# Supplementary material
Source: PubMed Central journal article supplement (PMC3725333)

## Supporting Information for

“Hexavalent Chromium-Induced Alteration of Proteomic Landscape in Human Skin Fibroblast Cells” by

Lei Guo, Yongsheng Xiao and Yinsheng Wang

*J. Proteome Res.*, 2013

### Table of Contents:

| Contents                                                                                                                                                                                                                  | Pages          |
|---------------------------------------------------------------------------------------------------------------------------------------------------------------------------------------------------------------------------|----------------|
| <b>Table S1.</b> List of primers used for real-time PCR.                                                                                                                                                                  | <b>2</b>       |
| <b>Table S2.</b> List of all proteins quantified and their expression ratios of cells treated with potassium dichromate versus untreated control cells from one set of forward and two sets of reverse SILAC experiments. | <b>3-171</b>   |
| <b>Table S3.</b> List of proteins whose expression was significantly changed upon K <sub>2</sub> Cr <sub>2</sub> O <sub>7</sub> treatment.                                                                                | <b>172-181</b> |
| <b>Table S4.</b> Pathways perturbed by potassium dichromate treatment, as identified by GenMAPP analysis. (A) Summary of significantly perturbed pathways. (B) List of proteins involved in the perturbed pathways.       | <b>182-183</b> |
| <b>Table S5.</b> GO annotation of significantly changed proteins by potassium dichromate treatment, as identified by GenMAPP analysis. (A) Summary of GO types. (B) List of proteins involved in different GO types.      | <b>184-192</b> |
| <b>Figure S1.</b> Cell viability test with MTT assay of GM00637 cells after 24 hrs of treatment with 0, 0.125, 0.5, 1, 2 μM potassium dichromate.                                                                         | <b>193</b>     |
| <b>Figure S2.</b> Determination of the threshold value of significantly changed proteins by Perseus.                                                                                                                      | <b>194</b>     |

**Table S1. List of primers used for real-time PCR as designed by Primer Premier 5.**

| <b>Genes</b>  | <b>Forward Primer</b>                     | <b>Reverse Primer</b>                |
|---------------|-------------------------------------------|--------------------------------------|
| <i>HMGCS1</i> | 5' - TGA AAA GCA CAG AAG AAC TTA CGC - 3' | 5' - TCT TGG CAG GGC TTG GAA TA - 3' |
| <i>HMGCR</i>  | 5' - TGG GGA ATT GTC ACT TAT GG - 3'      | 5' - GGG CTA TTC AGG CTG TCT TC - 3' |
| <i>FDPS</i>   | 5' - CAA AAT TGG CAC TGA CAT CC - 3'      | 5' - GCC ACT TTC TCA GCC TCC TT - 3' |
| <i>FDFT1</i>  | 5' - CAA GCA GTG ACC CTG ATG AT - 3'      | 5' - CTG AGT CGG GGA TTC TAT GA - 3' |
| <i>DHCR7</i>  | 5' - TGC CTT ATC TTT ACA CGC TG - 3'      | 5' - AAC AGG TCC TTC TGG TGG TT - 3' |

*HMGCS1*, 3-hydroxy-3-methylglutaryl-CoA synthase 1; *HMGCR*, 3-hydroxy-3-methylglutaryl-CoA reductase; *FDPS*, farnesyl diphosphate synthase; *FDFT1*, Squalene synthase ; *DHCR7*, 7-dehydrocholesterol reductase.

**Table S2.** List of all proteins quantified and their expression ratios of cells treated with potassium dichromate versus untreated control cells from one set of forward and two sets of reverse SILAC experiments. The average ratio and standard deviation (“S.D.”) of protein expression ratios derived from at least two sets of SILAC labeling experiments are listed. Shown also are the number of peptides identified for each protein (“Pep.”) and percentage sequence coverage (“Seq. Cov. (%)”).

| Protein IDs | Protein Names                                                          | Uniprot  | Ratio F1<br>(Treated/<br>Untreated) | Ratio R1<br>(Treated/<br>Untreated) | Ratio R2<br>(Treated/<br>Untreated) | Average<br>Ratio<br>(Treated/<br>Untreated) | S.D. | Pep. | Seq.<br>Cov.<br>(%) | PEP      |
|-------------|------------------------------------------------------------------------|----------|-------------------------------------|-------------------------------------|-------------------------------------|---------------------------------------------|------|------|---------------------|----------|
| IPI00000001 | Double-stranded RNA-binding protein Staufen homolog 1                  | O95793-1 | 1.24                                | 1.20                                | 1.13                                | 1.19                                        | 0.06 | 12   | 28.1                | 1E-182   |
| IPI00000005 | GTPase NRas                                                            | P01111   | 0.99                                | 1.09                                | 1.12                                | 1.07                                        | 0.07 | 7    | 40.2                | 3.2E-70  |
| IPI00000006 | c-H-ras                                                                | P01112   | 1.08                                | 1.00                                | 1.11                                | 1.06                                        | 0.06 | 7    | 40.2                | 2.19E-75 |
| IPI00000015 | Pre-mRNA-splicing factor SRP75                                         | Q08170   | 1.05                                | 0.90                                | 1.18                                | 1.04                                        | 0.14 | 11   | 20.6                | 3.2E-154 |
| IPI00000030 | PP2A B subunit isoform B56-delta                                       | Q14738-1 | 1.07                                | 1.26                                | 1.12                                | 1.15                                        | 0.10 | 13   | 25.2                | 4.29E-82 |
| IPI00000041 | Rho cDNA clone 6                                                       | P62745   | 0.94                                |                                     |                                     | 0.94                                        |      | 2    | 14.8                | 4.6E-175 |
| IPI00000051 | Prefoldin subunit 1                                                    | O60925   | 0.94                                | 0.79                                | 0.86                                | 0.87                                        | 0.08 | 4    | 32.8                | 2.45E-34 |
| IPI00000057 | Component of oligomeric Golgi complex 2                                | Q14746   |                                     |                                     | 0.98                                | 0.98                                        |      | 2    | 4.7                 | 3.8E-05  |
| IPI00000070 | Low-density lipoprotein receptor                                       | P01130   | 2.28                                | 4.07                                | 3.28                                | 3.21                                        | 0.90 | 3    | 5.1                 | 3.7E-102 |
| IPI00000075 | Latency-associated peptide                                             | P01137   |                                     |                                     | 0.75                                | 0.75                                        |      | 2    | 5.4                 | 0.002007 |
| IPI00000104 | GTP--RNA guanylyltransferase                                           | O60942-1 |                                     | 1.29                                |                                     | 1.29                                        |      | 2    | 4.4                 | 1.66E-06 |
| IPI00000105 | Lung resistance-related protein                                        | Q14764   | 1.34                                | 1.46                                | 1.45                                | 1.42                                        | 0.07 | 25   | 35.9                | 1.5E-189 |
| IPI00000138 | Alpha-1,3-mannosyl-glycoprotein 2-beta-N-acetylglucosaminyltransferase | P26572   | 0.74                                | 1.12                                | 0.65                                | 0.84                                        | 0.25 | 2    | 5.6                 | 1.55E-47 |
| IPI00000155 | 3-hydroxyisobutyrate dehydrogenase-like protein                        | Q49A26-1 |                                     | 1.41                                | 1.54                                | 1.47                                        | 0.09 | 3    | 7.4                 | 8.03E-32 |
| IPI00000162 | EIF4E-binding protein                                                  | Q8NEJ9-1 | 1.05                                | 0.89                                | 0.96                                | 0.96                                        | 0.08 | 5    | 14.6                | 2.59E-67 |
| IPI00000171 | TSC22 domain family protein 4                                          | Q9Y3Q8   | 2.01                                | 0.83                                | 0.75                                | 1.19                                        | 0.71 | 2    | 9.9                 | 8.63E-07 |
| IPI00000279 | DRG family-regulatory protein 1                                        | Q8WU90   | 0.79                                | 0.99                                | 0.96                                | 0.91                                        | 0.11 | 9    | 22.5                | 5.4E-130 |
| IPI00000330 | Sensor of single-strand DNA complex subunit C                          | Q9NRY2-1 |                                     | 1.02                                | 1.07                                | 1.04                                        | 0.03 | 1    | 12.5                | 2.18E-25 |
| IPI00000335 | HINT-3                                                                 | Q9BX68   | 1.10                                | 1.22                                | 1.34                                | 1.22                                        | 0.12 | 6    | 55.2                | 8E-206   |
| IPI00000398 | Nucleolar and spindle-associated protein 1                             | Q9BXS6-1 | 1.83                                | 1.55                                | 1.43                                | 1.60                                        | 0.20 | 7    | 23.8                | 2.03E-82 |
| IPI00000494 | 60S ribosomal protein L5                                               | P46777   | 0.81                                | 0.85                                | 0.88                                | 0.85                                        | 0.04 | 21   | 55.9                | 3.1E-217 |

|             |                                                                                    |          |      |      |      |      |      |    |      |          |
|-------------|------------------------------------------------------------------------------------|----------|------|------|------|------|------|----|------|----------|
| IPI00000581 | cDNA FLJ56307, highly similar to Ubiquitin thioesterase protein OTUB1 (EC 3.4.-.-) | B4DPD5   | 1.06 | 1.13 | 1.10 | 1.10 | 0.04 | 11 | 42.9 | 0        |
| IPI00000634 | Coiled-coil domain-containing protein 6                                            | Q16204   | 0.99 |      |      | 0.99 |      | 4  | 9.1  | 8.52E-70 |
| IPI00000643 | BAG family molecular chaperone regulator 2                                         | O95816   | 0.90 | 1.03 | 1.09 | 1.01 | 0.10 | 13 | 58.8 | 7.9E-160 |
| IPI00000684 | AGX-1                                                                              | Q16222-1 | 0.74 | 0.86 | 0.81 | 0.80 | 0.06 | 26 | 55.9 | 0        |
| IPI00000685 | 39 kDa protein kinase                                                              | P50613   |      | 1.11 | 1.00 | 1.05 | 0.07 | 3  | 10.7 | 6.02E-21 |
| IPI00000686 | Probable RNA-binding protein 19                                                    | Q9Y4C8   | 0.75 | 0.91 | 0.87 | 0.84 | 0.08 | 7  | 11.6 | 6.77E-73 |
| IPI00000690 | Apoptosis-inducing factor 1, mitochondrial                                         | O95831-1 | 1.00 | 0.87 | 1.00 | 0.96 | 0.07 | 18 | 37.2 | 4.4E-131 |
| IPI00000728 | Deubiquitinating enzyme 15                                                         | Q9Y4E8-1 | 0.83 | 1.00 | 0.78 | 0.87 | 0.11 | 11 | 13.6 | 7.25E-83 |
| IPI00000733 | U3 small nucleolar RNA-associated protein 18 homolog                               | Q9Y5J1   | 0.85 | 0.87 | 0.76 | 0.83 | 0.06 | 6  | 16.4 | 2.3E-103 |
| IPI00000760 | DDAHII                                                                             | O95865   | 1.45 | 1.25 | 1.29 | 1.33 | 0.11 | 12 | 48.4 | 0        |
| IPI00000769 | Kinesin-like DNA-binding protein                                                   | Q14807   | 0.98 | 1.47 | 1.35 | 1.26 | 0.25 | 5  | 12.5 | 5.3E-114 |
| IPI00000783 | Low molecular mass protein 7                                                       | P28062-1 | 0.97 | 1.05 | 1.28 | 1.10 | 0.16 | 5  | 17   | 1.97E-16 |
| IPI00000792 | NADPH:quinone reductase                                                            | Q08257   | 1.03 | 1.20 | 1.21 | 1.15 | 0.10 | 8  | 38   | 6.64E-84 |
| IPI00000811 | Macropain delta chain                                                              | P28072   | 0.96 | 1.04 | 1.06 | 1.02 | 0.05 | 7  | 33.5 | 4.15E-73 |
| IPI00000816 | 14-3-3 protein epsilon                                                             | P62258   | 1.04 | 1.03 | 1.06 | 1.04 | 0.01 | 28 | 77.3 | 0        |
| IPI00000821 | 39S ribosomal protein L16, mitochondrial                                           | Q9NX20   | 0.89 | 0.77 | 0.85 | 0.84 | 0.06 | 4  | 21.9 | 3.37E-56 |
| IPI00000858 | cDNA FLJ56180, highly similar to Negative elongation factor E                      | B4DYX9   | 1.12 | 1.10 | 1.14 | 1.12 | 0.02 | 4  | 13.4 | 7.12E-74 |
| IPI00000861 | LIM and SH3 domain protein 1                                                       | Q14847-1 | 1.03 | 1.12 | 1.17 | 1.11 | 0.07 | 19 | 68.2 | 6E-291   |
| IPI00000874 | Natural killer cell-enhancing factor A                                             | Q06830   | 1.02 | 1.15 | 1.16 | 1.11 | 0.08 | 19 | 60.8 | 1.8E-250 |
| IPI00000875 | cDNA FLJ56389, highly similar to Elongation factor 1-gamma                         | B4DTG2   | 0.76 | 0.87 | 0.82 | 0.81 | 0.05 | 27 | 53.6 | 0        |
| IPI00000877 | 150 kDa oxygen-regulated protein                                                   | Q9Y4L1   | 1.15 | 0.89 | 1.00 | 1.01 | 0.13 | 41 | 45.6 | 0        |
| IPI00000948 | Transducin beta-like protein 2                                                     | Q9Y4P3   | 0.87 | 1.09 | 0.94 | 0.97 | 0.11 | 8  | 20.6 | 5.25E-84 |
| IPI00001022 | Myofibrillogenesis regulator 1                                                     | Q8N490-2 | 1.11 | 1.32 |      | 1.22 | 0.15 | 3  | 30.3 | 8.54E-64 |
| IPI00001053 | Methylmalonic aciduria and homocystinuria type C protein                           | Q9Y4U1   | 1.29 | 1.03 | 0.84 | 1.05 | 0.22 | 2  | 14.2 | 1.9E-33  |
| IPI00001091 | AFG3-like protein 2                                                                | Q9Y4W6   | 1.04 | 0.92 | 0.86 | 0.94 | 0.09 | 12 | 14.7 | 1.7E-67  |
| IPI00001134 | RNA-binding motif protein 7                                                        | Q9Y580   |      | 1.22 |      | 1.22 |      | 2  | 6.4  | 0.000686 |
| IPI00001141 | Mitochondrial import inner membrane translocase subunit Tim22                      | Q9Y584   | 0.77 | 0.97 | 0.89 | 0.88 | 0.10 | 2  | 10.3 | 6.29E-17 |

|             |                                                               |          |      |      |      |      |      |    |      |          |
|-------------|---------------------------------------------------------------|----------|------|------|------|------|------|----|------|----------|
| IPI00001146 | U6 snRNA-associated Sm-like protein LSM6                      | P62312   | 0.91 | 1.11 | 1.07 | 1.03 | 0.11 | 5  | 48.8 | 2.03E-18 |
| IPI00001159 | GCN1-like protein 1                                           | Q92616   | 1.03 | 0.94 | 0.91 | 0.96 | 0.06 | 45 | 24   | 0        |
| IPI00001287 | Uncharacterized protein C20orf72                              | Q9BQP7   | 1.17 | 0.90 | 1.20 | 1.09 | 0.17 | 5  | 20.1 | 5.2E-47  |
| IPI00001364 | GC-rich sequence DNA-binding factor homolog                   | Q9Y5B6-1 |      | 1.04 |      | 1.04 |      | 3  | 3.3  | 0.000675 |
| IPI00001466 | Echinoderm microtubule-associated protein-like 4              | Q9HC35   | 1.00 | 0.89 | 1.01 | 0.97 | 0.06 | 8  | 10.5 | 1.56E-22 |
| IPI00001541 | Mitochondrial import inner membrane translocase subunit Tim9  | Q9Y5J7   | 0.69 | 0.61 | 0.85 | 0.71 | 0.12 | 4  | 47.2 | 8.96E-29 |
| IPI00001543 | Mitochondrial import inner membrane translocase subunit Tim10 | P62072   | 0.67 | 0.79 | 0.83 | 0.76 | 0.08 | 2  | 16.7 | 4.72E-38 |
| IPI00001546 | DDP-like protein                                              | Q9Y5J9   | 0.85 | 0.75 | 0.81 | 0.80 | 0.05 | 3  | 26.5 | 2.16E-15 |
| IPI00001560 | Cyclin-dependent kinase 4 inhibitor A                         | P42771-2 | 0.98 | 1.23 | 1.23 | 1.15 | 0.14 | 5  | 41.9 | 3.9E-120 |
| IPI00001568 | Vacuolar proton pump subunit D                                | Q9Y5K8   | 1.21 | 1.25 | 1.31 | 1.26 | 0.05 | 6  | 29.6 | 3.42E-73 |
| IPI00001578 | Uncharacterized protein C17orf62                              | Q9BQA9   | 1.02 | 1.28 |      | 1.15 | 0.18 | 3  | 13.4 | 5.33E-05 |
| IPI00001580 | FYVE and coiled-coil domain-containing protein 1              | Q9BQS8-1 |      | 0.93 |      | 0.93 |      | 2  | 3.2  | 0.011515 |
| IPI00001589 | Mitochondrial import inner membrane translocase subunit Tim13 | Q9Y5L4   | 0.76 | 0.69 | 0.81 | 0.75 | 0.06 | 3  | 41.1 | 4.73E-71 |
| IPI00001636 | Ataxin-10                                                     | Q9UBB4   | 0.81 | 1.22 | 1.15 | 1.06 | 0.22 | 16 | 44.8 | 0        |
| IPI00001639 | Importin subunit beta-1                                       | Q14974   | 0.92 | 1.10 | 1.11 | 1.04 | 0.11 | 30 | 42.5 | 0        |
| IPI00001641 | Origin recognition complex subunit 6                          | Q9Y5N6   |      | 1.47 | 1.18 | 1.32 | 0.20 | 2  | 11.1 | 6.53E-10 |
| IPI00001655 | Transcription factor IIB                                      | Q9Y6A4   | 1.01 | 1.24 | 1.17 | 1.14 | 0.12 | 7  | 29   | 3.92E-47 |
| IPI00001661 | RCC1-I                                                        | Q16269   | 0.94 | 1.01 | 0.98 | 0.97 | 0.04 | 9  | 30.3 | 4.4E-234 |
| IPI00001663 | High temperature requirement protein A2                       | O43464-1 | 1.14 |      |      | 1.14 |      | 3  | 7.9  | 3.65E-36 |
| IPI00001676 | Nuclear protein localization protein 4 homolog                | Q8TAT6-2 | 0.94 | 1.01 | 1.21 | 1.05 | 0.14 | 12 | 23.2 | 9.7E-156 |
| IPI00001690 | Cullin-7                                                      | Q14999   |      | 1.78 | 1.18 | 1.48 | 0.42 | 3  | 2.2  | 4.39E-10 |
| IPI00001710 | Another new gene 2 protein                                    | Q9UID3-1 |      | 0.86 | 1.05 | 0.95 | 0.13 | 4  | 7.9  | 3.86E-23 |
| IPI00001730 | FH1/FH2 domain-containing protein 1                           | Q9Y613   |      | 1.20 | 1.13 | 1.16 | 0.05 | 4  | 7.6  | 3.35E-48 |
| IPI00001734 | Phosphoserine aminotransferase                                | B4DHQ3   | 0.65 | 0.81 | 0.77 | 0.74 | 0.08 | 18 | 49.4 | 1.4E-255 |
| IPI00001738 | 88 kDa nucleoporin                                            | Q99567   | 0.82 | 0.98 | 0.90 | 0.90 | 0.08 | 8  | 18.8 | 4.1E-158 |
| IPI00001757 | Binder of OVCA1-1                                             | Q9Y5S9-1 | 1.03 | 1.06 | 0.98 | 1.02 | 0.04 | 8  | 33.3 | 4.8E-128 |
| IPI00001780 | Deubiquitinating enzyme 16                                    | Q9Y5T5-1 | 0.96 |      | 0.98 | 0.97 | 0.01 | 3  | 6    | 4.58E-14 |
| IPI00001871 | PRKC apoptosis WT1 regulator protein                          | Q96IZ0   | 0.78 | 0.86 | 0.75 | 0.80 | 0.06 | 10 | 41.2 | 1.3E-100 |

|             |                                                             |          |      |      |      |      |      |    |      |          |
|-------------|-------------------------------------------------------------|----------|------|------|------|------|------|----|------|----------|
| IPI00001883 | SH3 and PX domain-containing protein 1                      | Q9Y5X1   |      | 1.48 |      | 1.48 |      | 4  | 9.7  | 3E-133   |
| IPI00001891 | Ancient ubiquitous protein 1                                | Q9Y679-1 | 0.79 | 0.90 | 0.99 | 0.89 | 0.10 | 3  | 10.1 | 3.71E-91 |
| IPI00001914 | 23 kDa FK506-binding protein                                | Q9Y680-1 | 1.09 | 1.16 | 1.63 | 1.29 | 0.29 | 7  | 27.8 | 7.67E-40 |
| IPI00001960 | Chloride intracellular channel protein 4                    | Q9Y696   | 0.83 | 1.04 | 1.04 | 0.97 | 0.12 | 23 | 75.9 | 0        |
| IPI00001985 | Vacuolar protein sorting-associated protein 18 homolog      | Q9P253-1 |      | 1.47 | 0.95 | 1.21 | 0.37 | 5  | 8.4  | 8.78E-21 |
| IPI00001999 | Cancer/testis antigen 86                                    | O43482   | 0.74 | 1.08 | 0.77 | 0.86 | 0.18 | 2  | 18.8 | 7.39E-60 |
| IPI00002134 | 26S protease subunit S5 basic                               | Q16401   | 0.98 | 1.05 | 1.09 | 1.04 | 0.06 | 18 | 48.4 | 0        |
| IPI00002135 | Transforming, acidic coiled-coil containing protein 3       | Q9Y6A5   | 1.34 |      | 0.77 | 1.06 | 0.41 | 4  | 6.7  | 5.78E-13 |
| IPI00002149 | GTP-binding protein B                                       | Q9Y6B6   | 0.87 | 1.12 | 1.10 | 1.03 | 0.14 | 7  | 41.4 | 2.4E-148 |
| IPI00002186 | Brefeldin A-inhibited guanine nucleotide-exchange protein 2 | Q9Y6D5   | 0.86 | 1.28 | 1.40 | 1.18 | 0.29 | 4  | 3.1  | 6.9E-22  |
| IPI00002214 | Importin subunit alpha-2                                    | P52292   | 0.77 | 0.96 | 0.96 | 0.89 | 0.11 | 17 | 46.3 | 0        |
| IPI00002232 | Kinase from chicken homolog B                               | Q7L7X3-1 |      | 1.03 |      | 1.03 |      | 5  | 8.1  | 1.22E-17 |
| IPI00002255 | Beige-like protein                                          | P50851-1 |      |      | 0.84 | 0.84 |      | 2  | 0.9  | 2.57E-26 |
| IPI00002270 | UPF0364 protein C6orf211                                    | Q9H993   | 1.22 | 1.20 | 1.14 | 1.19 | 0.04 | 7  | 19   | 7.9E-110 |
| IPI00002324 | DTDP-4-keto-6-deoxy-D-glucose 4-reductase                   | Q9NZL9-1 | 1.04 | 1.11 | 1.20 | 1.12 | 0.08 | 9  | 30.8 | 7.7E-139 |
| IPI00002335 | Huntingtin                                                  | P42858   |      | 1.09 | 1.00 | 1.05 | 0.06 | 4  | 2.2  | 5.07E-25 |
| IPI00002349 | 82 kDa FMRP-interacting protein                             | Q7Z417   | 1.15 | 1.05 | 1.14 | 1.12 | 0.05 | 6  | 13.4 | 4.81E-58 |
| IPI00002372 | 70 kDa peroxisomal membrane protein                         | P28288-1 |      |      | 0.97 | 0.97 |      | 9  | 16.2 | 3.81E-28 |
| IPI00002408 | RNA polymerase II-associated protein 3                      | Q9H6T3-1 | 1.06 | 1.18 | 1.10 | 1.11 | 0.06 | 10 | 19.5 | 8.4E-189 |
| IPI00002459 | Annexin A6, isoform CRA_c                                   | A6NN80   | 1.06 | 1.05 | 1.01 | 1.04 | 0.03 | 60 | 78.3 | 0        |
| IPI00002460 | Annexin A7                                                  | P20073-1 | 1.05 | 1.17 | 1.23 | 1.15 | 0.09 | 10 | 21.7 | 2.28E-88 |
| IPI00002478 | Endothelin-converting enzyme 1                              | P42892-1 | 1.86 | 1.02 | 1.29 | 1.39 | 0.43 | 7  | 10.4 | 8.29E-44 |
| IPI00002496 | GDP-mannose pyrophosphorylase B                             | Q9Y5P6-2 | 0.93 | 1.05 |      | 0.99 | 0.09 | 11 | 38   | 4.8E-159 |
| IPI00002501 | Activating transcription factor 1                           | P18846   |      | 1.25 |      | 1.25 |      | 2  | 5.9  | 0.030704 |
| IPI00002506 | Asparagine-linked glycosylation protein 5 homolog           | Q9Y673   |      | 1.29 |      | 1.29 |      | 2  | 7.7  | 2.3E-05  |
| IPI00002519 | Glycine hydroxymethyltransferase                            | P34896-1 | 1.16 | 1.16 | 1.14 | 1.15 | 0.01 | 9  | 22.2 | 4.5E-183 |
| IPI00002520 | Glycine hydroxymethyltransferase                            | P34897   | 0.83 | 0.88 | 0.89 | 0.87 | 0.03 | 22 | 49.4 | 0        |
| IPI00002525 | Cell immortalization-related protein 2                      | Q9UMX5   | 1.45 | 1.02 | 0.93 | 1.13 | 0.28 | 6  | 45.9 | 3E-155   |

|             |                                                                              |          |      |      |      |      |      |    |      |          |
|-------------|------------------------------------------------------------------------------|----------|------|------|------|------|------|----|------|----------|
| IPI00002535 | 13 kDa FK506-binding protein                                                 | P26885   | 0.97 | 1.16 | 1.23 | 1.12 | 0.14 | 4  | 33.8 | 1.68E-21 |
| IPI00002557 | Coatomer subunit gamma-2                                                     | Q9UBF2   | 0.74 | 1.19 | 1.24 | 1.06 | 0.27 | 8  | 12.2 | 4E-122   |
| IPI00002564 | DNA repair protein XRCC1                                                     | P18887   | 0.95 | 1.19 | 1.19 | 1.11 | 0.13 | 9  | 18   | 5.78E-26 |
| IPI00002569 | Eukaryotic translation initiation factor 4E-binding protein 1                | Q13541   | 1.27 |      | 0.66 | 0.96 | 0.43 | 4  | 59.3 | 3.29E-61 |
| IPI00002580 | Phosphatidylinositol-4-phosphate 3-kinase C2 domain-containing subunit alpha | O00443   |      | 1.08 | 1.11 | 1.10 | 0.02 | 2  | 2.3  | 6E-145   |
| IPI00002707 | Spastic paraplegia 4 protein                                                 | Q9UBP0-1 | 1.02 |      |      | 1.02 |      | 2  | 5.2  | 0.000302 |
| IPI00002745 | Cathepsin P                                                                  | Q9UBR2   | 0.99 | 0.84 | 0.98 | 0.94 | 0.08 | 5  | 19.5 | 1.12E-42 |
| IPI00002790 | Protein sel-1 homolog 1                                                      | Q9UBV2-1 |      |      | 0.89 | 0.89 |      | 3  | 6.5  | 8.19E-63 |
| IPI00002802 | Lysyl oxidase                                                                | P28300   | 0.72 | 0.92 | 0.84 | 0.83 | 0.10 | 13 | 42.4 | 1.1E-72  |
| IPI00002804 | Protein kinase C-like 2                                                      | Q16513   | 0.99 | 1.14 | 1.06 | 1.06 | 0.07 | 19 | 28.8 | 7.8E-199 |
| IPI00002824 | Cysteine and glycine-rich protein 2                                          | Q16527   | 0.94 | 1.26 | 1.20 | 1.13 | 0.17 | 12 | 66.8 | 6.1E-268 |
| IPI00002853 | PP2A B subunit isoform B56-epsilon                                           | Q16537   | 1.17 |      | 0.99 | 1.08 | 0.13 | 6  | 15.8 | 7.3E-117 |
| IPI00002857 | Cytokine suppressive anti-inflammatory drug-binding protein                  | Q16539-1 | 1.05 | 1.15 | 1.16 | 1.12 | 0.06 | 8  | 31.9 | 4.02E-36 |
| IPI00002894 | DNA polymerase delta catalytic subunit                                       | P28340   |      | 1.09 |      | 1.09 |      | 17 | 16.4 | 3.4E-53  |
| IPI00002895 | DRB sensitivity-inducing factor 14 kDa subunit                               | P63272   | 0.80 |      |      | 0.80 |      | 2  | 13.7 | 0.006576 |
| IPI00002902 | Nucleolar protein 9                                                          | Q5SY16   | 1.12 | 1.10 | 1.03 | 1.08 | 0.04 | 4  | 11.4 | 3.39E-64 |
| IPI00002922 | F-box-like/WD repeat-containing protein TBL1XR1                              | Q9BZK7   | 0.92 | 1.23 | 1.16 | 1.10 | 0.16 | 5  | 13.6 | 6.1E-33  |
| IPI00002926 | ESCRT-I complex subunit VPS37B                                               | Q9H9H4   | 1.28 | 1.08 |      | 1.18 | 0.15 | 2  | 15.1 | 3.89E-75 |
| IPI00002938 | Activator of basal transcription 1                                           | Q9ULW3   | 1.23 |      | 0.88 | 1.06 | 0.25 | 3  | 16.9 | 6.12E-06 |
| IPI00002966 | Heat shock 70 kDa protein 4                                                  | P34932   | 0.91 | 1.02 | 0.99 | 0.97 | 0.06 | 53 | 69.5 | 0        |
| IPI00002968 | Molybdenum cofactor synthesis 2                                              | O96033   | 0.90 |      |      | 0.90 |      | 2  | 21.6 | 0.000368 |
| IPI00002993 | RNA polymerase II TBP-associated factor subunit G                            | Q16594   |      | 1.25 | 1.26 | 1.25 | 0.01 | 5  | 23.1 | 4.81E-18 |
| IPI00003004 | Glutamate/H(+) symporter 1                                                   | Q9H936   | 0.94 | 0.98 | 1.03 | 0.98 | 0.04 | 5  | 15.8 | 6.48E-42 |
| IPI00003027 | Gem-associated protein 7                                                     | Q9H840   |      |      | 0.76 | 0.76 |      | 3  | 26   | 4E-109   |
| IPI00003031 | Isochorismatase domain-containing protein 2, mitochondrial                   | Q96AB3-2 | 0.80 | 1.03 | 1.18 | 1.00 | 0.20 | 3  | 17.6 | 7E-34    |
| IPI00003168 | 41 kDa phosphoribosylpyrophosphate synthetase-associated protein             | O60256   | 0.96 | 1.25 | 1.12 | 1.11 | 0.15 | 8  | 27.1 | 1.1E-136 |
| IPI00003217 | Macropain chain Z                                                            | Q99436   | 0.98 | 1.06 | 1.04 | 1.03 | 0.04 | 7  | 27.4 | 5.89E-81 |

|             |                                                                         |          |      |      |      |      |      |    |      |          |
|-------------|-------------------------------------------------------------------------|----------|------|------|------|------|------|----|------|----------|
| IPI00003269 | Beta-actin-like protein 2                                               | Q562R1   | 1.13 | 0.88 | 0.97 | 0.99 | 0.12 | 10 | 19.9 | 0        |
| IPI00003309 | DNA-directed RNA polymerase II subunit H                                | P52434   | 0.98 | 1.07 | 1.12 | 1.06 | 0.07 | 5  | 32.7 | 4.8E-150 |
| IPI00003310 | RPB11a protein                                                          | Q9H1A6   | 0.73 |      |      | 0.73 |      | 2  | 15   | 7.02E-07 |
| IPI00003318 | Protein FON                                                             | Q9UHR6   |      | 0.91 | 0.85 | 0.88 | 0.04 | 2  | 5.7  | 1.18E-13 |
| IPI00003326 | ADP-ribosylation factor-like protein 2                                  | P36404   | 0.88 | 1.20 | 1.18 | 1.09 | 0.18 | 6  | 42.9 | 2.34E-56 |
| IPI00003327 | ADP-ribosylation factor-like protein 3                                  | P36405   | 1.19 | 1.12 | 1.17 | 1.16 | 0.03 | 7  | 46.2 | 1.6E-31  |
| IPI00003348 | G protein subunit beta-2                                                | P62879   | 1.20 | 1.58 | 1.40 | 1.39 | 0.19 | 12 | 40.9 | 6.9E-240 |
| IPI00003362 | 78 kDa glucose-regulated protein                                        | P11021   | 1.11 | 0.83 | 0.92 | 0.95 | 0.14 | 46 | 55.6 | 0        |
| IPI00003369 | LIM domain-containing protein 1                                         | Q9UGP4   | 1.02 | 1.41 | 1.19 | 1.21 | 0.19 | 4  | 9.5  | 3.6E-81  |
| IPI00003377 | Splicing factor 9G8                                                     | Q16629-1 | 1.05 | 0.96 | 0.96 | 0.99 | 0.05 | 10 | 33.6 | 2.7E-115 |
| IPI00003386 | Protein ZYP                                                             | P62877   |      |      | 1.06 | 1.06 |      | 1  | 7.4  | 0.003025 |
| IPI00003394 | Component of gems 1                                                     | Q16637-1 | 0.91 | 1.10 | 0.94 | 0.98 | 0.10 | 4  | 19.7 | 5.7E-107 |
| IPI00003406 | Developmentally-regulated brain protein                                 | Q16643-1 |      |      | 0.90 | 0.90 |      | 31 | 47.3 | 1.6E-271 |
| IPI00003419 | Small acidic protein                                                    | O00193   | 1.36 | 1.00 | 0.92 | 1.09 | 0.24 | 6  | 40.4 | 0        |
| IPI00003420 | APC-binding protein EB2                                                 | Q15555-1 | 1.05 | 1.39 | 1.10 | 1.18 | 0.18 | 11 | 39.4 | 1.41E-84 |
| IPI00003421 | T-box brain protein 1                                                   | Q16650   |      |      | 0.86 | 0.86 |      | 1  | 1.8  | 0.008442 |
| IPI00003438 | DnaJ homolog subfamily C member 8                                       | O75937   | 1.30 | 1.07 | 1.11 | 1.16 | 0.12 | 9  | 34.8 | 4.5E-168 |
| IPI00003443 | Gamma-interferon-inducible protein 16                                   | Q16666-1 | 1.04 | 1.22 | 1.15 | 1.14 | 0.09 | 13 | 20   | 2.83E-89 |
| IPI00003479 | Mitogen-activated protein kinase 1                                      | P28482   | 0.99 | 1.19 | 1.17 | 1.12 | 0.11 | 15 | 46.1 | 7E-106   |
| IPI00003482 | 2,4-dienoyl-CoA reductase [NADPH]                                       | Q16698   | 0.91 | 1.17 | 1.20 | 1.09 | 0.16 | 6  | 26   | 7E-106   |
| IPI00003494 | Esp1-associated protein                                                 | O95997   |      | 0.96 |      | 0.96 |      | 1  | 7.4  | 9.39E-20 |
| IPI00003505 | Human papillomavirus type 16 E1 protein-binding protein                 | Q15645-1 | 1.06 | 1.27 | 1.15 | 1.16 | 0.11 | 7  | 19.9 | 7.5E-102 |
| IPI00003515 | Clonal evolution-related gene on chromosome 14 protein                  | Q15643   |      | 1.16 |      | 1.16 |      | 2  | 1    | 0.006648 |
| IPI00003519 | 116 kDa U5 small nuclear ribonucleoprotein component                    | Q15029   | 0.93 | 0.93 | 0.94 | 0.93 | 0.01 | 38 | 46.7 | 0        |
| IPI00003527 | Ezrin-radixin-moesin-binding phosphoprotein 50                          | O14745   | 1.79 | 1.16 | 1.26 | 1.40 | 0.34 | 5  | 22.6 | 2.73E-62 |
| IPI00003565 | 26S proteasome non-ATPase regulatory subunit 10                         | O75832   | 0.97 | 1.14 | 1.12 | 1.08 | 0.09 | 7  | 37.6 | 2.87E-65 |
| IPI00003588 | Aminoacyl tRNA synthetase complex-interacting multifunctional protein 3 | O43324   | 0.89 | 1.08 | 0.98 | 0.99 | 0.09 | 4  | 20.1 | 9.36E-42 |
| IPI00003590 | Quiescinq Q6                                                            | O00391-1 |      |      | 1.20 | 1.20 |      | 4  | 8.3  | 2.56E-41 |



|             |                                                                   |          |      |      |      |      |      |    |      |          |
|-------------|-------------------------------------------------------------------|----------|------|------|------|------|------|----|------|----------|
| IPI00003627 | 53 kDa BRG1-associated factor A                                   | O96019-1 | 1.04 | 1.08 | 1.14 | 1.09 | 0.05 | 10 | 30.1 | 6E-118   |
| IPI00003704 | Lark homolog                                                      | Q9BWF3-1 | 0.79 | 1.10 | 0.95 | 0.95 | 0.15 | 15 | 50.8 | 1.5E-284 |
| IPI00003706 | RNA-binding motif, single-stranded-interacting protein 2          | Q15434   |      |      | 1.17 | 1.17 |      | 4  | 8.6  | 7.36E-05 |
| IPI00003739 | DEAD box protein 49                                               | Q9Y6V7   | 0.75 | 0.67 | 0.92 | 0.78 | 0.13 | 7  | 22.8 | 5.9E-101 |
| IPI00003765 | Calpain-7                                                         | Q9Y6W3   | 0.96 | 1.20 | 0.93 | 1.03 | 0.15 | 3  | 4.9  | 1.23E-08 |
| IPI00003766 | Ethylmalonic encephalopathy protein 1                             | O95571   | 0.96 | 1.01 | 0.88 | 0.95 | 0.07 | 8  | 37   | 1.24E-73 |
| IPI00003768 | Pescadillo homolog                                                | O00541-1 | 0.65 | 0.96 | 0.83 | 0.81 | 0.16 | 14 | 22.8 | 2.01E-51 |
| IPI00003783 | Dual specificity mitogen-activated protein kinase kinase 2        | P36507   | 0.96 | 1.14 | 1.09 | 1.06 | 0.09 | 13 | 42.8 | 0        |
| IPI00003802 | Alpha-mannosidase 2                                               | Q16706   | 0.89 | 0.97 | 1.01 | 0.95 | 0.06 | 9  | 8.9  | 4.02E-42 |
| IPI00003817 | Rho GDP dissociation inhibitor (GDI) beta                         | P52566   |      | 1.84 |      | 1.84 |      | 1  | 6.5  | 7.2E-07  |
| IPI00003833 | Met-induced mitochondrial protein                                 | Q9Y6C9   | 0.78 | 0.99 | 0.95 | 0.90 | 0.11 | 9  | 32   | 6.21E-96 |
| IPI00003848 | DnaJ homolog subfamily B member 4                                 | Q9UDY4   | 0.97 | 0.93 | 0.84 | 0.91 | 0.07 | 14 | 44.8 | 9.9E-228 |
| IPI00003856 | Vacuolar proton pump subunit E 1                                  | P36543   | 1.02 | 1.30 | 1.36 | 1.23 | 0.18 | 7  | 29.6 | 4.81E-41 |
| IPI00003865 | Heat shock 70 kDa protein 8                                       | P11142-1 | 0.93 | 0.91 | 0.94 | 0.93 | 0.02 | 50 | 69.5 | 0        |
| IPI00003870 | Endopeptidase Clp                                                 | Q16740   | 1.30 | 0.86 | 0.80 | 0.99 | 0.27 | 8  | 38.3 | 5.83E-94 |
| IPI00003881 | Heterogeneous nuclear ribonucleoprotein F                         | P52597   | 1.02 | 1.17 | 1.11 | 1.10 | 0.08 | 10 | 33.7 | 0        |
| IPI00003894 | RING finger protein 11                                            | Q9Y3C5   | 1.23 |      |      | 1.23 |      | 1  | 7.8  | 0.00117  |
| IPI00003918 | 60S ribosomal protein L1                                          | P36578   | 0.91 | 0.94 | 0.89 | 0.91 | 0.03 | 31 | 54.6 | 0        |
| IPI00003923 | OMPdecase                                                         | P11172-1 | 0.93 | 1.09 | 0.93 | 0.98 | 0.09 | 12 | 30.6 | 5.3E-136 |
| IPI00003925 | Pyruvate dehydrogenase E1 component subunit beta, mitochondrial   | P11177-1 | 0.98 | 1.10 | 1.09 | 1.05 | 0.07 | 11 | 34   | 3.4E-262 |
| IPI00003927 | 40 kDa peptidyl-prolyl cis-trans isomerase                        | Q08752   | 1.00 | 1.10 | 0.93 | 1.01 | 0.08 | 8  | 26.2 | 4.1E-32  |
| IPI00003933 | Glyoxalase II                                                     | Q16775-1 | 1.13 | 1.32 | 1.53 | 1.33 | 0.20 | 3  | 10.1 | 5.51E-57 |
| IPI00003935 | Histone H2B type 2-E                                              | Q16778   | 1.04 |      |      | 1.04 |      | 15 | 77.8 | 4.8E-177 |
| IPI00003944 | Branched-chain alpha-keto acid dehydrogenase complex component E2 | P11182   | 1.06 | 1.25 |      | 1.16 | 0.13 | 3  | 7.3  | 7E-135   |
| IPI00003949 | Bendless-like ubiquitin-conjugating enzyme                        | P61088   | 1.09 | 0.99 | 1.04 | 1.04 | 0.05 | 9  | 52.6 | 3.15E-76 |
| IPI00003965 | Deubiquitinating enzyme 7                                         | Q93009   | 0.98 | 1.03 | 1.00 | 1.00 | 0.03 | 20 | 23.8 | 4.3E-148 |
| IPI00003968 | Complex I-39kD                                                    | Q16795   | 0.87 | 0.93 | 1.03 | 0.94 | 0.08 | 8  | 30.2 | 6.07E-33 |
| IPI00003971 | Neuroendocrine-specific protein                                   | Q16799-1 |      | 0.97 |      | 0.97 |      | 3  | 4.4  | 0.004057 |

|             |                                                            |          |      |      |      |      |      |    |      |          |
|-------------|------------------------------------------------------------|----------|------|------|------|------|------|----|------|----------|
| IPI00003985 | BCS1-like protein                                          | Q9Y276   | 0.95 | 1.00 | 0.62 | 0.85 | 0.21 | 3  | 10.5 | 8.68E-53 |
| IPI00004233 | Antigen KI-67                                              | P46013-1 | 1.16 | 1.22 | 1.11 | 1.16 | 0.06 | 24 | 12.7 | 1.1E-201 |
| IPI00004273 | Arg/Glu/Asp-rich protein of 120 kDa                        | P49756-1 | 1.11 | 1.05 | 1.05 | 1.07 | 0.03 | 17 | 25.5 | 1E-100   |
| IPI00004290 | Digestive organ expansion factor homolog                   | Q68CQ4   | 0.84 |      | 0.95 | 0.89 | 0.08 | 3  | 5    | 1.99E-05 |
| IPI00004308 | Protein ftsJ homolog 1                                     | Q9UET6   | 0.93 |      | 1.20 | 1.06 | 0.19 | 3  | 13.7 | 1.51E-48 |
| IPI00004312 | Signal transducer and activator of transcription 2         | P52630-1 | 1.04 | 1.45 | 1.63 | 1.37 | 0.30 | 6  | 8.9  | 2E-43    |
| IPI00004324 | BET3 homolog                                               | O43617   | 0.86 | 1.10 | 1.02 | 0.99 | 0.12 | 6  | 33.9 | 1.96E-94 |
| IPI00004337 | Zinc finger and BTB domain-containing protein 11           | O95625   |      | 1.28 |      | 1.28 |      | 2  | 3    | 8.59E-16 |
| IPI00004358 | Glycogen phosphorylase, brain form                         | P11216   | 1.01 | 1.13 | 1.15 | 1.10 | 0.08 | 35 | 47.3 | 0        |
| IPI00004363 | DCHT                                                       | Q9UEW8   | 0.86 | 0.89 | 0.92 | 0.89 | 0.03 | 5  | 19   | 3.3E-34  |
| IPI00004392 | 7,8-dihydro-8-oxoguanine triphosphatase                    | P36639-1 | 1.03 | 1.24 | 1.26 | 1.18 | 0.13 | 4  | 20.8 | 1.3E-199 |
| IPI00004397 | cDNA FLJ55177, highly similar to Ras-related protein Ral-B | B4E040   | 1.14 | 1.24 | 1.24 | 1.21 | 0.06 | 9  | 32.9 | 7.4E-115 |
| IPI00004408 | Adducin-like protein 70                                    | Q9UEY8-1 | 1.25 | 1.55 | 1.19 | 1.33 | 0.20 | 4  | 7.2  | 1.05E-83 |
| IPI00004416 | Charged multivesicular body protein 2a                     | O43633   | 1.14 | 1.32 | 1.25 | 1.24 | 0.09 | 3  | 16.7 | 1.53E-44 |
| IPI00004436 | Cancer-associated Sm-like                                  | O15116   |      |      | 0.55 | 0.55 |      | 2  | 26.3 | 1.63E-06 |
| IPI00004459 | 18S rRNA dimethylase                                       | Q9UNQ2   | 0.59 | 0.55 | 0.72 | 0.62 | 0.09 | 7  | 26.5 | 8.06E-43 |
| IPI00004472 | Erythrocyte 65 kDa protein                                 | Q9H4A3-1 | 1.01 | 0.91 | 1.05 | 0.99 | 0.07 | 4  | 2.3  | 3.71E-20 |
| IPI00004497 | Breakpoint cluster region protein                          | P11274-1 |      | 1.06 |      | 1.06 |      | 2  | 1.6  | 0.018962 |
| IPI00004506 | BTB/POZ domain-containing protein KCTD5                    | Q9NXV2   |      | 0.83 |      | 0.83 |      | 2  | 12.4 | 1.33E-56 |
| IPI00004655 | FSHD region gene 1 protein                                 | Q14331   | 0.92 | 1.11 | 0.96 | 0.99 | 0.10 | 6  | 29.1 | 5.84E-95 |
| IPI00004668 | Alpha-(1,6)-fucosyltransferase                             | Q9BYC5-1 |      | 0.80 |      | 0.80 |      | 4  | 9.6  | 4.86E-07 |
| IPI00004669 | Polypeptide GalNAc transferase 2                           | Q10471   | 0.82 | 1.25 | 1.10 | 1.06 | 0.22 | 10 | 16.1 | 8.7E-129 |
| IPI00004712 | Checkpoint protein HUS1                                    | O60921   |      |      | 0.99 | 0.99 |      | 1  | 7.1  | 0.00036  |
| IPI00004758 | Autosomal recessive hypercholesterolemia protein           | Q5SW96   |      |      | 1.55 | 1.55 |      | 2  | 8.4  | 1.98E-05 |
| IPI00004795 | Chloride channel, nucleotide sensitive 1A                  | P54105   | 1.09 | 0.83 | 0.96 | 0.96 | 0.13 | 5  | 38.4 | 5.08E-68 |
| IPI00004838 | Adapter molecule crk                                       | P46108-1 | 1.17 | 1.07 | 1.06 | 1.10 | 0.06 | 13 | 55.9 | 5.7E-258 |
| IPI00004839 | Crk-like protein                                           | P46109   | 1.30 | 1.01 | 1.02 | 1.11 | 0.17 | 8  | 38.9 | 1.1E-117 |
| IPI00004845 | Protein NipSnap homolog 3A                                 | Q9UFN0   |      | 1.09 | 1.36 | 1.22 | 0.19 | 4  | 22.7 | 2.73E-14 |

|             |                                                                   |          |      |      |      |      |      |    |      |          |
|-------------|-------------------------------------------------------------------|----------|------|------|------|------|------|----|------|----------|
| IPI00004859 | Bloom syndrome protein                                            | P54132   |      |      | 0.86 | 0.86 |      | 3  | 2    | 0.009337 |
| IPI00004860 | Arginine--tRNA ligase                                             | P54136-1 | 0.85 | 0.97 | 0.94 | 0.92 | 0.06 | 37 | 53.5 | 0        |
| IPI00004928 | Egl nine homolog 1                                                | Q9GZT9-1 | 1.24 | 1.19 |      | 1.21 | 0.04 | 3  | 10.1 | 3.23E-42 |
| IPI00004942 | Nucleolar autoantigen 36                                          | Q9Y3S2   | 0.74 | 0.81 |      | 0.78 | 0.05 | 3  | 10.6 | 1.76E-32 |
| IPI00004962 | Golgi integral membrane protein 4                                 | O00461   | 0.55 | 0.58 | 0.63 | 0.59 | 0.04 | 12 | 19.5 | 2.5E-256 |
| IPI00004968 | Nuclear matrix protein 200                                        | Q9UMS4   | 0.95 | 1.07 | 1.00 | 1.01 | 0.06 | 17 | 43.8 | 1.3E-222 |
| IPI00005015 | CCR4-associated factor 3                                          | O75175-1 | 1.04 | 1.07 | 0.91 | 1.01 | 0.09 | 6  | 11.7 | 3.82E-60 |
| IPI00005030 | EH-binding protein 10                                             | Q9P0V3-1 | 0.94 | 1.15 | 1.07 | 1.05 | 0.11 | 13 | 17.3 | 9.96E-73 |
| IPI00005036 | RNA binding motif protein 5                                       | P52756-1 | 1.79 | 1.31 |      | 1.55 | 0.34 | 2  | 2.9  | 7.75E-05 |
| IPI00005038 | 14.5 kDa translational inhibitor protein                          | P52758   | 1.07 | 0.73 | 1.08 | 0.96 | 0.20 | 4  | 40.9 | 3.37E-74 |
| IPI00005039 | Translation initiation factor IF-2, mitochondrial                 | P46199   |      |      | 1.25 | 1.25 |      | 2  | 4.3  | 0.000566 |
| IPI00005050 | 28S ribosomal protein S14, mitochondrial                          | O60783   | 0.95 |      | 0.99 | 0.97 | 0.03 | 2  | 21.9 | 1.34E-29 |
| IPI00005055 | UPF0428 protein CXorf56                                           | Q9H5V9   | 0.97 | 1.20 | 1.07 | 1.08 | 0.11 | 4  | 21.2 | 1.24E-22 |
| IPI00005087 | Tropomodulin-3                                                    | Q9NYL9   | 0.98 | 1.06 | 1.05 | 1.03 | 0.05 | 16 | 51.4 | 0        |
| IPI00005102 | Spermidine aminopropyltransferase                                 | P52788-1 | 0.87 | 1.05 | 0.98 | 0.97 | 0.09 | 14 | 43.4 | 4.4E-204 |
| IPI00005107 | Niemann-Pick C1 protein                                           | O15118   |      | 0.45 | 1.41 | 0.93 | 0.68 | 2  | 2    | 3.6E-18  |
| IPI00005129 | Secretory carrier-associated membrane protein 1                   | O15126-1 |      | 0.79 | 1.08 | 0.93 | 0.20 | 3  | 14.8 | 1.69E-22 |
| IPI00005154 | Chromatin-specific transcription elongation factor 80 kDa subunit | Q08945   | 1.07 | 1.10 | 1.08 | 1.08 | 0.01 | 23 | 34.1 | 0        |
| IPI00005158 | Lon protease homolog, mitochondrial                               | P36776   | 0.94 | 0.80 | 0.85 | 0.86 | 0.08 | 21 | 26.7 | 1.1E-201 |
| IPI00005160 | Actin-related protein 2/3 complex subunit 1B                      | O15143   | 0.84 | 1.21 | 1.18 | 1.08 | 0.20 | 12 | 34.9 | 7.8E-130 |
| IPI00005161 | Actin-related protein 2/3 complex subunit 2                       | O15144   | 0.97 | 1.10 | 1.15 | 1.07 | 0.09 | 15 | 47.3 | 1.1E-153 |
| IPI00005163 | ADP-ribosylation factor-like protein 15                           | Q9NXU5   |      |      | 0.99 | 0.99 |      | 1  | 5.9  | 0.000734 |
| IPI00005179 | AC40                                                              | O15160-1 | 0.85 | 0.88 | 0.90 | 0.88 | 0.03 | 7  | 29.5 | 7.8E-150 |
| IPI00005181 | Ca(2+)-dependent phospholipid scramblase 1                        | O15162   | 1.25 | 0.99 | 1.29 | 1.18 | 0.16 | 2  | 7.2  | 1.65E-55 |
| IPI00005194 | Ubiquitin domain-containing protein UBFD1                         | O14562   | 1.20 | 1.07 | 0.72 | 1.00 | 0.25 | 3  | 11.6 | 3.6E-124 |
| IPI00005198 | Interleukin enhancer-binding factor 2                             | Q12905   | 1.07 | 1.09 | 1.05 | 1.07 | 0.02 | 15 | 50.3 | 0        |
| IPI00005202 | Membrane-associated progesterone receptor component 2             | O15173   | 1.25 | 0.93 | 1.00 | 1.06 | 0.17 | 11 | 36.4 | 1.2E-282 |
| IPI00005210 | Centrin-3                                                         | O15182   | 0.97 |      |      | 0.97 |      | 4  | 22.2 | 3.66E-14 |
| IPI00005218 | MOCO1-B                                                           | O96007   | 0.94 | 1.25 | 1.07 | 1.09 | 0.16 | 4  | 18.6 | 2.1E-106 |

|             |                                                     |          |      |      |      |      |      |     |      |          |
|-------------|-----------------------------------------------------|----------|------|------|------|------|------|-----|------|----------|
| IPI00005223 | Madh6                                               | O15198-1 | 1.15 |      |      | 1.15 |      | 1   | 2.8  | 9.34E-13 |
| IPI00005260 | Proteasome activator complex subunit 4              | Q14997-1 |      | 1.20 | 1.08 | 1.14 | 0.08 | 4   | 3.4  | 1.23E-56 |
| IPI00005490 | Coat protein GPP34                                  | Q9H4A6   | 0.93 | 1.06 | 1.04 | 1.01 | 0.07 | 4   | 15.1 | 1.74E-92 |
| IPI00005492 | BMP2-induced 3-kb gene protein                      | P61964   | 1.04 | 1.14 | 1.07 | 1.08 | 0.05 | 4   | 19.2 | 5.1E-38  |
| IPI00005511 | PHD finger-like domain-containing protein 5A        | Q7RTV0   | 0.81 | 1.05 | 1.04 | 0.97 | 0.13 | 6   | 61.8 | 1.3E-180 |
| IPI00005537 | 39S ribosomal protein L12, mitochondrial            | P52815   | 1.09 | 0.94 | 0.89 | 0.98 | 0.10 | 11  | 31.4 | 3.3E-165 |
| IPI00005573 | 5(3)-deoxyribonucleotidase, cytosolic type          | Q8TCD5-1 |      | 1.23 | 1.17 | 1.20 | 0.05 | 3   | 19.9 | 2.49E-14 |
| IPI00005578 | EH domain-containing protein 4                      | Q9H223   | 1.20 | 1.08 | 1.11 | 1.13 | 0.06 | 17  | 42   | 5.9E-278 |
| IPI00005585 | Glutaminase-interacting protein 3                   | O14907   | 1.01 |      | 1.12 | 1.06 | 0.08 | 1   | 13.7 | 1.12E-68 |
| IPI00005613 | Splicing factor U2AF 35 kDa subunit                 | Q01081   | 0.87 | 1.08 | 1.06 | 1.01 | 0.12 | 6   | 29.2 | 8.6E-118 |
| IPI00005614 | Beta-II spectrin                                    | Q01082-1 | 1.09 | 1.04 | 1.09 | 1.08 | 0.03 | 103 | 51.9 | 0        |
| IPI00005634 | Tetratricopeptide repeat protein 37                 | Q6PGP7   | 1.44 | 1.76 | 0.86 | 1.35 | 0.46 | 6   | 6.3  | 4.22E-83 |
| IPI00005648 | Scaffold attachment factor B2                       | Q14151   | 1.43 | 1.09 | 0.41 | 0.98 | 0.52 | 12  | 15.3 | 1.06E-75 |
| IPI00005657 | Prefoldin subunit 6                                 | O15212   | 1.10 | 0.84 | 0.89 | 0.94 | 0.14 | 6   | 39.5 | 2.4E-104 |
| IPI00005658 | Ubiquitin-like protein 4A                           | P11441   | 1.41 |      |      | 1.41 |      | 6   | 47.1 | 1.61E-98 |
| IPI00005677 | Acyl-CoA: dihydroxyacetonephosphate acyltransferase | O15228   | 0.90 | 0.86 | 0.94 | 0.90 | 0.04 | 5   | 9.1  | 7.11E-16 |
| IPI00005692 | 28S ribosomal protein S12, mitochondrial            | O15235   |      |      | 1.04 | 1.04 |      | 2   | 15.2 | 0.002058 |
| IPI00005715 | Homozygously deleted in neuroblastoma 1             | O95155-1 | 1.18 | 1.07 | 1.18 | 1.14 | 0.06 | 6   | 7.4  | 6.87E-89 |
| IPI00005719 | Ras-related protein Rab-1A                          | P62820-1 | 0.84 | 1.08 | 1.11 | 1.01 | 0.15 | 14  | 66.8 | 0        |
| IPI00005724 | 40 kDa erythrocyte membrane protein                 | O43813   | 1.01 | 0.98 | 1.33 | 1.10 | 0.19 | 5   | 17.3 | 1.45E-60 |
| IPI00005728 | Protein RER1                                        | O15258   |      | 1.25 |      | 1.25 |      | 2   | 13.6 | 1.17E-17 |
| IPI00005737 | Surfeit locus protein 4                             | O15260-1 |      | 0.44 | 1.44 | 0.94 | 0.71 | 2   | 11.5 | 1.48E-17 |
| IPI00005740 | Neighbor of COX4                                    | O43402   | 0.86 | 0.97 | 1.10 | 0.98 | 0.12 | 6   | 24.3 | 6.85E-23 |
| IPI00005745 | Long chain base biosynthesis protein 1              | O15269   | 0.89 | 1.15 | 1.06 | 1.03 | 0.13 | 11  | 25.4 | 3E-151   |
| IPI00005751 | Long chain base biosynthesis protein 2              | O15270   |      | 0.85 | 0.96 | 0.91 | 0.08 | 3   | 8.7  | 7.19E-33 |
| IPI00005777 | Chromosome 3p kinase                                | Q16644   |      | 1.01 |      | 1.01 |      | 2   | 8.1  | 0.004393 |
| IPI00005780 | O-GlcNAc transferase subunit p110                   | O15294-1 |      | 0.85 | 0.67 | 0.76 | 0.13 | 6   | 7.9  | 2.16E-56 |
| IPI00005791 | Highly expressed in cancer protein                  | O14777   | 1.46 | 1.42 | 1.14 | 1.34 | 0.17 | 14  | 26.9 | 9.87E-24 |
| IPI00005792 | Nuclear poly(A)-binding protein 1                   | Q86U42-1 | 1.06 | 1.23 | 1.16 | 1.15 | 0.09 | 5   | 27.1 | 7.23E-31 |
| IPI00005822 | Anaphase-promoting complex subunit 8                | Q9UJX2-1 |      | 0.82 | 0.93 | 0.88 | 0.08 | 7   | 13.1 | 3.52E-61 |

|             |                                                                   |          |      |      |      |      |      |    |      |          |
|-------------|-------------------------------------------------------------------|----------|------|------|------|------|------|----|------|----------|
| IPI00005826 | HECT domain and RCC1-like domain-containing protein 2             | O95714   |      | 0.83 | 0.96 | 0.89 | 0.09 | 3  | 0.8  | 6.53E-33 |
| IPI00005861 | Pre-mRNA-splicing factor 3                                        | O43395-1 | 0.97 | 1.05 | 1.07 | 1.03 | 0.05 | 10 | 20.5 | 1.1E-176 |
| IPI00005904 | Component of gems 3                                               | Q9UHI6   | 0.77 | 1.25 | 0.89 | 0.97 | 0.25 | 6  | 11.5 | 3.64E-22 |
| IPI00005914 | Carbohydrate kinase-like protein                                  | Q9UHI6   |      |      | 1.03 | 1.03 |      | 3  | 10.3 | 1.15E-29 |
| IPI00005948 | Mediator of RhoA-dependent invasion                               | Q9BV20-1 | 1.09 | 1.08 | 0.97 | 1.05 | 0.07 | 6  | 22.5 | 2.35E-27 |
| IPI00005966 | 13 kDa differentiation-associated protein                         | Q9UI09   | 1.20 | 0.75 | 1.30 | 1.09 | 0.30 | 2  | 19.9 | 8.18E-35 |
| IPI00005969 | CapZ alpha-1                                                      | P52907   | 1.12 | 1.00 | 1.04 | 1.05 | 0.06 | 14 | 67.5 | 0        |
| IPI00005978 | Protein PR264                                                     | Q01130   | 1.31 | 1.03 | 1.00 | 1.11 | 0.17 | 7  | 27.1 | 8.1E-108 |
| IPI00005996 | High mobility group AT-hook protein 2                             | P52926   | 1.45 |      | 0.95 | 1.20 | 0.35 | 6  | 58.7 | 0        |
| IPI00006025 | Squamous cell carcinoma antigen recognized by T-cells 3           | Q15020-1 | 0.96 | 1.08 | 1.04 | 1.02 | 0.07 | 15 | 21.2 | 1.4E-162 |
| IPI00006050 | Protein FAM115A                                                   | Q9Y4C2-1 | 0.74 |      |      | 0.74 |      | 2  | 4.2  | 0.005587 |
| IPI00006052 | Prefoldin subunit 2                                               | Q9UHV9   | 1.07 | 0.98 | 0.97 | 1.01 | 0.05 | 10 | 53.9 | 9.9E-229 |
| IPI00006079 | Bcl-2-associated transcription factor 1                           | Q9NYF8-1 | 1.19 | 0.98 | 0.97 | 1.05 | 0.13 | 13 | 14.2 | 5.7E-167 |
| IPI00006092 | Phosphomannomutase 2                                              | O15305   | 0.82 | 1.02 | 0.86 | 0.90 | 0.10 | 7  | 27.2 | 1.78E-62 |
| IPI00006099 | Ribosome assembly protein BMS1 homolog                            | Q14692   |      | 0.75 | 0.80 | 0.77 | 0.03 | 4  | 3.7  | 9.82E-09 |
| IPI00006103 | CD2 antigen cytoplasmic tail-binding protein 2                    | O95400   | 0.90 |      | 1.09 | 0.99 | 0.13 | 4  | 16.4 | 2.21E-28 |
| IPI00006113 | DNA-directed RNA polymerase II subunit I                          | P36954   |      | 0.91 | 0.95 | 0.93 | 0.03 | 2  | 24   | 8.73E-68 |
| IPI00006142 | ARM protein lost in epithelial cancers on chromosome X 2          | Q7L311   |      |      | 0.67 | 0.67 |      | 2  | 6.6  | 9E-17    |
| IPI00006164 | Integrin-linked kinase-associated serine/threonine phosphatase 2C | Q9H0C8   | 0.94 | 1.19 | 1.09 | 1.07 | 0.12 | 9  | 23   | 7.97E-67 |
| IPI00006167 | Protein phosphatase 1C                                            | O15355   | 1.03 | 1.27 | 1.05 | 1.12 | 0.13 | 10 | 26.2 | 6.9E-109 |
| IPI00006176 | Hepatocyte growth factor-regulated tyrosine kinase substrate      | O14964-1 | 0.80 | 1.07 | 1.07 | 0.98 | 0.16 | 7  | 10.2 | 2.37E-62 |
| IPI00006197 | Nuclear valosin-containing protein-like                           | O15381-1 | 0.82 |      | 0.97 | 0.89 | 0.11 | 2  | 4.1  | 6.5E-94  |
| IPI00006205 | Acetyl-coenzyme A transporter 1                                   | O00400   |      |      | 0.82 | 0.82 |      | 2  | 3.5  | 1.89E-20 |
| IPI00006207 | GC-binding factor 2                                               | Q32MZ4-2 | 1.10 | 0.94 | 1.06 | 1.03 | 0.08 | 9  | 17.1 | 6.6E-247 |
| IPI00006210 | Apoptosis inhibitor 4                                             | O15392-1 |      | 1.20 | 1.28 | 1.24 | 0.06 | 3  | 30.3 | 3.26E-82 |
| IPI00006211 | Vesicle-associated membrane protein-associated protein B/C        | O95292-1 | 1.02 | 1.06 | 1.05 | 1.04 | 0.02 | 14 | 55.1 | 2.2E-145 |
| IPI00006298 | CASP10                                                            | Q13427-1 |      | 0.87 |      | 0.87 |      | 2  | 3.4  | 4.2E-23  |

|             |                                                       |          |      |      |      |      |      |    |      |          |
|-------------|-------------------------------------------------------|----------|------|------|------|------|------|----|------|----------|
| IPI00006378 | Coiled-coil domain-containing protein 72              | Q9Y2S6   | 1.15 |      |      | 1.15 |      | 2  | 23.4 | 0.000229 |
| IPI00006379 | Nucleolar protein 5                                   | Q9Y2X3   | 0.83 | 0.86 | 0.86 | 0.85 | 0.01 | 21 | 38.4 | 0        |
| IPI00006408 | eNOS-interacting protein                              | Q9Y314   | 0.82 | 1.21 | 1.08 | 1.03 | 0.20 | 9  | 45.8 | 2.9E-252 |
| IPI00006440 | 28S ribosomal protein S7, mitochondrial               | Q9Y2R9   | 0.75 | 0.84 | 0.78 | 0.79 | 0.05 | 8  | 33.1 | 3.33E-44 |
| IPI00006442 | Coilin                                                | P38432   | 5.24 | 1.27 | 1.03 | 2.51 | 2.37 | 8  | 18.4 | 2.25E-52 |
| IPI00006451 | N-ethylmaleimide-sensitive fusion protein             | P46459   | 0.95 | 1.13 | 1.05 | 1.05 | 0.09 | 19 | 26.7 | 1.8E-208 |
| IPI00006504 | eIF-2B GDP-GTP exchange factor subunit gamma          | Q9NR50-1 | 0.77 | 0.92 | 0.82 | 0.84 | 0.07 | 7  | 18.8 | 3.12E-37 |
| IPI00006552 | BTG1-binding factor 1                                 | Q9UIV1   | 0.97 | 1.16 | 1.03 | 1.05 | 0.10 | 3  | 12.3 | 1.23E-27 |
| IPI00006558 | Bax-interacting factor 1                              | Q9Y371-1 | 0.90 |      | 1.12 | 1.01 | 0.15 | 14 | 29.9 | 5.9E-115 |
| IPI00006579 | Cytochrome c oxidase polypeptide IV                   | P13073   | 0.90 | 0.89 | 1.03 | 0.94 | 0.08 | 5  | 25.4 | 1.98E-21 |
| IPI00006586 | Epidermal Langerhans cell protein LCP1                | O94842   | 1.26 |      |      | 1.26 |      | 2  | 4.2  | 3.16E-12 |
| IPI00006592 | Peptide methionine sulfoxide reductase                | Q9UJ68   |      | 1.08 |      | 1.08 |      | 2  | 14   | 1.25E-10 |
| IPI00006606 | 28S ribosomal protein S13, mitochondrial              | Q9BYN8   | 1.04 | 0.91 | 1.00 | 0.99 | 0.07 | 9  | 45.9 | 2.13E-81 |
| IPI00006615 | Caseinolytic peptidase B protein homolog              | Q9H078-1 |      | 0.84 | 1.04 | 0.94 | 0.14 | 6  | 12.4 | 7.99E-58 |
| IPI00006657 | Protein FAM20B                                        | O75063   |      | 1.20 |      | 1.20 |      | 2  | 7.1  | 5.78E-05 |
| IPI00006658 | Parvulin-14                                           | Q9Y237-2 | 1.47 |      | 1.07 | 1.27 | 0.29 | 3  | 17.3 | 9.63E-97 |
| IPI00006663 | Aldehyde dehydrogenase, mitochondrial                 | P05091   | 1.01 | 1.28 | 1.29 | 1.19 | 0.16 | 10 | 26.9 | 5.6E-144 |
| IPI00006675 | ATP-binding cassette sub-family C member 4            | O15439-1 |      | 1.14 |      | 1.14 |      | 2  | 1.4  | 0.01485  |
| IPI00006713 | DnaJ homolog subfamily C member 3                     | Q13217   | 1.26 | 0.91 | 1.39 | 1.19 | 0.25 | 5  | 16.1 | 1.29E-40 |
| IPI00006715 | Double-strand-break repair protein rad21 homolog      | O60216   | 1.11 | 1.14 | 1.30 | 1.18 | 0.10 | 7  | 19   | 2.5E-59  |
| IPI00006723 | cDNA FLJ56825, highly similar to WD repeat protein 57 | B4DQJ1   | 0.87 | 1.03 | 1.10 | 1.00 | 0.12 | 11 | 31.3 | 3.3E-156 |
| IPI00006725 | 100 kDa U5 snRNP-specific protein                     | Q9BUQ8   | 1.17 | 1.18 | 1.17 | 1.18 | 0.00 | 14 | 20.1 | 3.83E-34 |
| IPI00006754 | DDB1- and CUL4-associated factor 7                    | P61962   | 0.88 | 0.62 | 0.99 | 0.83 | 0.19 | 2  | 9.4  | 8.02E-18 |
| IPI00006800 | APG5-like                                             | Q9H1Y0-1 | 1.53 | 1.09 | 1.20 | 1.27 | 0.23 | 3  | 17.1 | 3.33E-59 |
| IPI00006863 | Sperm-associated antigen 7                            | O75391   | 1.25 | 1.26 | 1.47 | 1.33 | 0.12 | 5  | 24.2 | 4.8E-169 |
| IPI00006865 | ER-Golgi SNARE of 24 kDa                              | O75396   | 0.97 | 1.05 | 1.08 | 1.03 | 0.06 | 12 | 46   | 0        |
| IPI00006900 | Charged amino acid-rich leucine zipper 1              | Q9NQZ2   | 1.01 | 0.95 | 0.99 | 0.98 | 0.03 | 7  | 16.1 | 2.49E-62 |
| IPI00006904 | Cell death regulator Aven                             | Q9NQS1   | 1.10 |      | 0.91 | 1.01 | 0.14 | 3  | 14.6 | 2.01E-73 |
| IPI00006907 | Probable fructose-2,6-bisphosphatase TIGAR            | Q9NQ88   | 0.77 | 1.10 | 1.02 | 0.96 | 0.17 | 9  | 38.5 | 1.9E-178 |

|             |                                                      |          |      |      |      |      |      |    |      |          |
|-------------|------------------------------------------------------|----------|------|------|------|------|------|----|------|----------|
| IPI00006932 | Putative RNA-binding protein Luc7-like 2             | Q9Y383-1 | 1.07 | 1.12 | 1.06 | 1.08 | 0.04 | 9  | 23.8 | 5.08E-50 |
| IPI00006952 | Beta-lactamase-like protein 2                        | Q53H82   | 0.67 | 0.98 | 0.88 | 0.84 | 0.15 | 3  | 12.8 | 2.29E-21 |
| IPI00006957 | Dehydrogenase/reductase SDR family member 7          | Q9Y394-1 | 0.94 | 1.13 | 1.15 | 1.07 | 0.12 | 4  | 21.5 | 3.03E-42 |
| IPI00006970 | 28S ribosomal protein S2, mitochondrial              | Q9Y399   | 0.80 | 0.80 | 0.74 | 0.78 | 0.04 | 3  | 8.8  | 1.55E-05 |
| IPI00006971 | Endosialin                                           | Q9HCU0-1 | 1.51 |      |      | 1.51 |      | 1  | 1.3  | 0.00408  |
| IPI00006980 | UPF0568 protein C14orf166                            | Q9Y224   | 0.85 | 1.00 | 0.94 | 0.93 | 0.07 | 16 | 60.2 | 1.4E-207 |
| IPI00006987 | ATP-dependent RNA helicase DDX24                     | Q9GZR7   | 0.76 | 1.13 | 0.99 | 0.96 | 0.19 | 9  | 19.6 | 6.9E-106 |
| IPI00007001 | 39S ribosomal protein L11, mitochondrial             | Q9Y3B7   | 0.97 | 1.00 | 1.03 | 1.00 | 0.03 | 16 | 65.1 | 0        |
| IPI00007004 | Ribosomal RNA-processing protein 15                  | Q9Y3B9   | 0.80 | 0.82 | 0.79 | 0.80 | 0.02 | 6  | 24.5 | 4.95E-64 |
| IPI00007019 | Peptidyl-prolyl cis-trans isomerase-like 1           | Q9Y3C6   | 0.98 | 1.07 | 1.09 | 1.05 | 0.06 | 6  | 37.3 | 7.71E-82 |
| IPI00007021 | Mediator complex subunit 31                          | Q9Y3C7   | 0.96 |      |      | 0.96 |      | 1  | 13   | 3.8E-168 |
| IPI00007024 | Protein FAM96B                                       | Q9Y3D0   | 1.02 | 1.17 | 1.14 | 1.11 | 0.08 | 4  | 52.1 | 2.4E-102 |
| IPI00007052 | FIS1 homolog                                         | Q9Y3D6   | 0.93 | 1.22 | 1.22 | 1.12 | 0.17 | 3  | 21.7 | 4.04E-70 |
| IPI00007057 | 110 kDa protein                                      | Q9H1K0   | 1.25 |      |      | 1.25 |      | 2  | 2.9  | 7.62E-06 |
| IPI00007058 | Coronin-1B                                           | Q9BR76   | 1.09 | 1.43 | 1.40 | 1.31 | 0.18 | 12 | 25.8 | 2.6E-101 |
| IPI00007063 | Hepatoma-derived growth factor 2                     | Q9Y3E1   | 1.41 |      | 1.10 | 1.25 | 0.22 | 4  | 17.2 | 2.31E-30 |
| IPI00007074 | Tyrosyl--tRNA ligase                                 | P54577   | 0.83 | 0.89 | 0.84 | 0.85 | 0.03 | 34 | 58.1 | 9.7E-239 |
| IPI00007088 | Anaphase-promoting complex subunit 10                | Q9UM13   | 0.97 | 0.97 |      | 0.97 | 0.00 | 2  | 14.6 | 0.000851 |
| IPI00007089 | Hairy cell leukemia protein 1                        | O95478   | 0.79 | 1.01 | 0.99 | 0.93 | 0.12 | 4  | 16.5 | 1.8E-09  |
| IPI00007102 | cDNA FLJ76436                                        | A8K8F0   | 1.15 | 1.28 | 1.23 | 1.22 | 0.07 | 15 | 28.4 | 2.73E-69 |
| IPI00007117 | Monocyte Arg-serpin                                  | P05120   | 0.86 | 0.71 | 0.81 | 0.79 | 0.07 | 6  | 20   | 5.2E-106 |
| IPI00007118 | Endothelial plasminogen activator inhibitor          | P05121   | 0.41 | 0.36 | 0.46 | 0.41 | 0.05 | 9  | 28.1 | 4.08E-42 |
| IPI00007123 | 90 kDa ribosomal protein S6 kinase 6                 | Q9UK32   |      | 0.77 |      | 0.77 |      | 2  | 3.5  | 0.00544  |
| IPI00007144 | 60S ribosomal protein L26-like 1                     | Q9UNX3   | 1.11 | 1.23 | 1.04 | 1.12 | 0.10 | 14 | 53.8 | 9.16E-35 |
| IPI00007146 | DNA replication complex GINS protein PSF2            | Q9Y248   | 1.12 | 1.06 | 0.69 | 0.96 | 0.24 | 3  | 18.4 | 1.13E-19 |
| IPI00007155 | ESCRT-I complex subunit VPS28                        | Q9UK41   |      | 1.04 |      | 1.04 |      | 8  | 40.3 | 8.5E-162 |
| IPI00007166 | Immediate early response 3-interacting protein 1     | Q9Y5U9   | 1.01 |      | 1.16 | 1.09 | 0.11 | 2  | 34.1 | 1E-115   |
| IPI00007174 | N-acetyltransferase 5                                | P61599   | 1.00 | 1.04 | 0.98 | 1.01 | 0.03 | 3  | 20.8 | 3.58E-31 |
| IPI00007175 | 60S ribosome subunit biogenesis protein NIP7 homolog | Q9Y221-1 |      | 0.78 |      | 0.78 |      | 2  | 10.6 | 0.000995 |

|             |                                                                                                             |          |      |      |      |      |      |    |      |          |
|-------------|-------------------------------------------------------------------------------------------------------------|----------|------|------|------|------|------|----|------|----------|
| IPI00007188 | Adenine nucleotide translocator 2                                                                           | P05141   | 0.77 | 0.99 | 0.86 | 0.87 | 0.11 | 16 | 43.6 | 4.79E-90 |
| IPI00007208 | DEAD box protein 41                                                                                         | Q9UJV9   |      | 1.11 | 1.15 | 1.13 | 0.03 | 3  | 7.1  | 2.89E-07 |
| IPI00007253 | Protein TRS85 homolog                                                                                       | Q9Y2L5-1 |      | 0.43 |      | 0.43 |      | 2  | 4    | 0.000343 |
| IPI00007264 | Alpha-crystallin C chain                                                                                    | Q9UJY1   |      | 0.99 | 1.17 | 1.08 | 0.13 | 2  | 11.2 | 5.63E-05 |
| IPI00007277 | Leucine-rich repeat flightless-interacting protein 2                                                        | Q9Y608-1 | 1.70 | 1.14 | 1.06 | 1.30 | 0.35 | 5  | 9.3  | 1.65E-67 |
| IPI00007283 | DNA-directed RNA polymerase II subunit D                                                                    | O15514   | 1.17 | 1.06 | 0.97 | 1.07 | 0.10 | 5  | 54.2 | 5.01E-72 |
| IPI00007304 | Protein ariadne-2 homolog                                                                                   | O95376   | 1.07 | 1.21 | 0.92 | 1.07 | 0.14 | 3  | 8.9  | 6.16E-79 |
| IPI00007309 | Mitochondrial import inner membrane translocase subunit Tim23                                               | O14925   |      |      | 0.82 | 0.82 |      | 2  | 12   | 1.2E-29  |
| IPI00007321 | cDNA FLJ60607, highly similar to Acyl-protein thioesterase 1 (EC 3.1.2.-)                                   | B4DJV9   | 0.83 | 1.00 | 0.96 | 0.93 | 0.09 | 5  | 26.2 | 1.62E-16 |
| IPI00007334 | Apoptotic chromatin condensation inducer in the nucleus                                                     | Q9UKV3-1 | 1.28 | 1.35 |      | 1.32 | 0.05 | 14 | 14.1 | 5.6E-258 |
| IPI00007346 | Peptidyl-prolyl cis-trans isomerase H                                                                       | O43447   | 0.98 | 1.19 | 1.14 | 1.10 | 0.11 | 8  | 47.5 | 6.43E-41 |
| IPI00007401 | Importin-8                                                                                                  | O15397   | 0.98 | 0.99 | 1.01 | 1.00 | 0.02 | 8  | 9.3  | 1.91E-53 |
| IPI00007402 | Importin-7                                                                                                  | O95373   | 0.81 | 0.86 | 0.89 | 0.85 | 0.04 | 22 | 26.5 | 0        |
| IPI00007404 | APG7-like                                                                                                   | O95352-1 | 1.00 | 0.84 | 1.00 | 0.95 | 0.09 | 4  | 9.4  | 1.31E-39 |
| IPI00007423 | Acidic leucine-rich nuclear phosphoprotein 32 family member B                                               | Q92688-1 | 1.03 | 1.05 | 1.01 | 1.03 | 0.02 | 13 | 38.6 | 6.6E-251 |
| IPI00007426 | ADP-ribosylation factor-like protein 6-interacting protein 5                                                | O75915   | 1.33 | 1.03 | 1.26 | 1.21 | 0.16 | 2  | 16   | 1.73E-43 |
| IPI00007611 | ATP synthase subunit O, mitochondrial                                                                       | P48047   | 1.04 | 0.94 | 1.01 | 0.99 | 0.05 | 10 | 57.7 | 1E-140   |
| IPI00007672 | DNA repair protein XRCC4                                                                                    | Q13426-1 |      |      | 0.80 | 0.80 |      | 2  | 10.4 | 2.27E-17 |
| IPI00007673 | Aging-associated gene 10 protein                                                                            | Q9Y6H1   | 1.14 | 0.94 | 0.92 | 1.00 | 0.12 | 4  | 33.8 | 5.3E-149 |
| IPI00007675 | Cytoplasmic dynein 1 light intermediate chain 1                                                             | Q9Y6G9   | 1.08 | 1.12 | 0.97 | 1.06 | 0.07 | 16 | 42.8 | 1.6E-233 |
| IPI00007676 | 17-beta-hydroxysteroid dehydrogenase 12                                                                     | Q53GQ0   | 0.81 | 1.05 | 1.11 | 0.99 | 0.16 | 8  | 28.2 | 4.4E-104 |
| IPI00007682 | Vacuolar ATPase isoform VA68                                                                                | P38606   | 1.12 | 1.19 | 1.13 | 1.15 | 0.04 | 17 | 36.3 | 0        |
| IPI00007691 | Hematopoietic stem/progenitor cell protein 172                                                              | Q9Y296   | 0.95 | 1.07 | 1.22 | 1.08 | 0.13 | 7  | 32.4 | 9.08E-79 |
| IPI00007694 | Protein phosphatase methylesterase 1                                                                        | Q9Y570-1 | 0.56 | 1.00 | 0.91 | 0.82 | 0.23 | 12 | 38.9 | 4.8E-150 |
| IPI00007722 | cDNA, FLJ95309, highly similar to Homo sapiens adenosine monophosphate deaminase 2 (isoform L)(AMPD2), mRNA | B2RB47   | 1.13 | 1.04 | 0.94 | 1.04 | 0.09 | 10 | 12.8 | 1.25E-50 |
| IPI00007729 | Nucleolar protein 7                                                                                         | Q9UMY1-1 | 0.94 | 0.92 | 0.90 | 0.92 | 0.02 | 5  | 23   | 1.54E-68 |



|             |                                                                                           |          |      |      |      |      |      |    |      |          |
|-------------|-------------------------------------------------------------------------------------------|----------|------|------|------|------|------|----|------|----------|
| IPI00007752 | Tubulin beta-2 chain                                                                      | P68371   | 1.07 | 1.13 | 1.13 | 1.11 | 0.03 | 34 | 75.5 | 0        |
| IPI00007755 | Ras-related protein Rab-21                                                                | Q9UL25   | 0.77 | 1.03 | 1.04 | 0.95 | 0.15 | 10 | 41.8 | 3.8E-181 |
| IPI00007756 | Ras-related protein Rab-22A                                                               | Q9UL26   | 1.13 | 1.20 | 1.23 | 1.18 | 0.05 | 5  | 28.9 | 6.66E-22 |
| IPI00007765 | 75 kDa glucose-regulated protein                                                          | P38646   | 0.90 | 0.84 | 0.89 | 0.87 | 0.03 | 40 | 52.7 | 0        |
| IPI00007797 | Epidermal-type fatty acid-binding protein                                                 | Q01469   | 0.79 | 1.00 | 0.92 | 0.90 | 0.11 | 12 | 65.9 | 2.6E-285 |
| IPI00007811 | Cell division protein kinase 4                                                            | P11802   | 0.78 | 0.98 | 0.97 | 0.91 | 0.12 | 14 | 56.8 | 3.6E-120 |
| IPI00007812 | Endomembrane proton pump 58 kDa subunit                                                   | P21281   | 1.07 | 1.10 | 1.19 | 1.12 | 0.06 | 14 | 38.2 | 3E-176   |
| IPI00007814 | Vacuolar proton pump subunit C 1                                                          | P21283   | 0.91 | 1.05 | 1.07 | 1.01 | 0.09 | 8  | 23.6 | 2.35E-58 |
| IPI00007818 | Cleavage and polyadenylation specificity factor 73 kDa subunit                            | Q9UKF6   | 0.88 | 1.06 | 0.94 | 0.96 | 0.09 | 6  | 10.7 | 5.54E-16 |
| IPI00007909 | PRA1 family protein 1                                                                     | Q9UI14   | 0.95 |      |      | 0.95 |      | 2  | 10.3 | 1.07E-44 |
| IPI00007926 | c-Myc-responsive protein Rcl                                                              | O43598   |      |      | 0.89 | 0.89 |      | 2  | 20.1 | 1.1E-26  |
| IPI00007927 | Chromosome-associated protein E                                                           | O95347-1 | 0.98 | 1.09 | 1.13 | 1.07 | 0.08 | 52 | 46.7 | 0        |
| IPI00007928 | 220 kDa U5 snRNP-specific protein                                                         | Q6P2Q9   | 0.84 | 1.05 | 0.96 | 0.95 | 0.11 | 46 | 23.3 | 0        |
| IPI00007935 | Enigma homolog                                                                            | Q96HC4   | 0.68 | 1.11 | 0.92 | 0.90 | 0.22 | 19 | 39.3 | 0        |
| IPI00007940 | cDNA, FLJ96656, highly similar to Homo sapiens SPFH domain family, member 1 (SPFH1), mRNA | B2RDK6   | 0.95 | 1.22 | 1.17 | 1.11 | 0.14 | 11 | 33   | 1.7E-135 |
| IPI00007941 | Cardiac lineage protein 1                                                                 | O94992   | 1.48 |      | 1.33 | 1.40 | 0.11 | 3  | 10.3 | 1.08E-64 |
| IPI00007943 | Associated molecule with the SH3 domain of STAM                                           | O95630   | 0.84 |      |      | 0.84 |      | 2  | 6.6  | 0.011023 |
| IPI00007948 | DNA-directed RNA polymerase III subunit C                                                 | Q9BU14   |      |      | 1.11 | 1.11 |      | 2  | 6.7  | 2.75E-12 |
| IPI00007956 | Thioredoxin-binding protein 2                                                             | Q9H3M7   | 2.15 |      |      | 2.15 |      | 2  | 7.2  | 4.42E-09 |
| IPI00008034 | Ras-related protein Rab-23                                                                | Q9ULC3   | 0.95 | 1.17 | 1.15 | 1.09 | 0.13 | 9  | 55.3 | 1.5E-116 |
| IPI00008164 | Post-proline cleaving enzyme                                                              | P48147   | 1.23 | 1.12 | 1.10 | 1.15 | 0.07 | 14 | 28.2 | 0        |
| IPI00008167 | Sodium/potassium-dependent ATPase subunit beta-3                                          | P54709   | 1.07 | 1.10 | 1.06 | 1.07 | 0.02 | 8  | 30.5 | 4.04E-84 |
| IPI00008207 | Endoplasmic reticulum mannosyl-oligosaccharide 1,2-alpha-mannosidase                      | Q9UKM7   | 0.88 |      |      | 0.88 |      | 2  | 6.4  | 7.95E-07 |
| IPI00008215 | Malic enzyme 1                                                                            | P48163   | 0.87 | 1.33 | 1.26 | 1.16 | 0.25 | 7  | 16.6 | 6.12E-22 |
| IPI00008219 | UV excision repair protein RAD23 homolog A                                                | P54725   | 1.30 | 1.00 | 1.05 | 1.12 | 0.16 | 5  | 24.5 | 3.7E-123 |
| IPI00008223 | UV excision repair protein RAD23 homolog B                                                | P54727   | 1.35 | 1.01 | 1.07 | 1.14 | 0.18 | 16 | 44.3 | 1.1E-177 |
| IPI00008234 | NADH-cytochrome b5 reductase 2                                                            | Q6BCY4-1 | 1.43 | 1.04 | 1.20 | 1.22 | 0.20 | 6  | 26.4 | 1.65E-12 |
| IPI00008240 | Methionine--tRNA ligase                                                                   | P56192   | 0.82 | 0.99 | 0.88 | 0.90 | 0.09 | 28 | 38.6 | 0        |

|             |                                                                         |          |      |      |      |      |      |    |      |          |
|-------------|-------------------------------------------------------------------------|----------|------|------|------|------|------|----|------|----------|
| IPI00008247 | Anaphase-promoting complex subunit 5                                    | Q9UJX4-1 |      |      | 0.77 | 0.77 |      | 1  | 2.4  | 1.44E-28 |
| IPI00008248 | Anaphase promoting complex subunit 7                                    | A5D8X2   | 0.72 | 0.97 | 0.98 | 0.89 | 0.15 | 3  | 7.2  | 2.22E-31 |
| IPI00008274 | Adenylyl cyclase-associated protein 1                                   | Q01518-1 | 1.04 | 1.07 | 1.08 | 1.06 | 0.02 | 32 | 62.5 | 0        |
| IPI00008380 | Replication protein C                                                   | P67775   | 0.86 | 1.14 | 0.96 | 0.99 | 0.14 | 16 | 58.3 | 0        |
| IPI00008418 | Diablo homolog, mitochondrial                                           | Q9NR28-1 | 1.09 | 0.98 | 0.99 | 1.02 | 0.06 | 7  | 22.5 | 2.95E-60 |
| IPI00008422 | ATP-dependent helicase 1                                                | Q9H4L7-2 | 0.72 | 0.99 | 0.81 | 0.84 | 0.13 | 2  | 3.6  | 8.21E-39 |
| IPI00008433 | 40S ribosomal protein S5                                                | P46782   | 0.82 | 0.91 | 0.87 | 0.87 | 0.05 | 13 | 45.1 | 0        |
| IPI00008437 | Probable ribosome biogenesis protein RLP24                              | Q9UHA3   | 0.80 |      |      | 0.80 |      | 3  | 22.1 | 7.58E-20 |
| IPI00008438 | 40S ribosomal protein S10                                               | P46783   | 0.89 | 0.88 | 0.88 | 0.88 | 0.01 | 16 | 61.8 | 2.2E-201 |
| IPI00008454 | APOBEC1-binding protein 2                                               | Q9UBS4   | 1.25 | 1.00 | 1.10 | 1.12 | 0.13 | 10 | 30.4 | 4E-268   |
| IPI00008475 | HMG-CoA synthase                                                        | Q01581   | 4.78 | 3.13 | 4.39 | 4.10 | 0.86 | 11 | 32.7 | 2.3E-157 |
| IPI00008485 | Citrate hydro-lyase                                                     | P21399   | 1.11 | 1.34 | 1.35 | 1.27 | 0.14 | 23 | 31.6 | 0        |
| IPI00008524 | Polyadenylate-binding protein 1                                         | P11940-1 | 0.84 | 0.90 | 0.89 | 0.88 | 0.03 | 35 | 57.9 | 0        |
| IPI00008527 | 60S acidic ribosomal protein P1                                         | P05386   | 0.97 | 0.75 | 0.82 | 0.85 | 0.11 | 2  | 51.8 | 1.7E-102 |
| IPI00008529 | 60S acidic ribosomal protein P2                                         | P05387   | 0.96 | 0.84 | 0.82 | 0.87 | 0.07 | 10 | 80.9 | 0        |
| IPI00008530 | 60S acidic ribosomal protein P0                                         | P05388   | 0.83 | 0.86 | 0.88 | 0.86 | 0.02 | 14 | 51.4 | 3.3E-233 |
| IPI00008531 | Protein CoREST                                                          | Q9UKL0   |      |      | 1.09 | 1.09 |      | 2  | 5.8  | 7.51E-32 |
| IPI00008536 | Glioma-amplified sequence 41                                            | O95619   |      |      | 0.96 | 0.96 |      | 2  | 9.7  | 3.9E-09  |
| IPI00008542 | F-box only protein 28                                                   | Q9NVF7   | 0.96 |      |      | 0.96 |      | 2  | 6.5  | 3.91E-29 |
| IPI00008552 | Glutaredoxin-3                                                          | O76003   | 0.89 | 0.96 | 0.91 | 0.92 | 0.04 | 7  | 26.9 | 3.12E-39 |
| IPI00008557 | Coding region determinant-binding protein                               | Q9NZI8   | 0.99 | 1.00 | 1.01 | 1.00 | 0.01 | 16 | 35.4 | 0        |
| IPI00008569 | Synaptobrevin homolog YKT6                                              | O15498   | 0.96 | 1.14 | 1.11 | 1.07 | 0.09 | 7  | 38.9 | 1.31E-72 |
| IPI00008575 | GAP-associated tyrosine phosphoprotein p62                              | Q07666-1 | 1.10 | 1.08 | 1.11 | 1.10 | 0.02 | 10 | 28.4 | 4.1E-119 |
| IPI00008599 | 3-beta-hydroxysteroid-delta(8),delta(7)-isomerase                       | Q15125   | 1.36 |      |      | 1.36 |      | 2  | 9.6  | 5.71E-23 |
| IPI00008613 | Interferon-induced 35 kDa protein                                       | P80217-1 | 1.35 | 1.32 | 1.35 | 1.34 | 0.02 | 5  | 21.9 | 1.09E-17 |
| IPI00008708 | CATX-11                                                                 | O76021   | 0.87 | 0.87 | 0.86 | 0.87 | 0.01 | 28 | 50.8 | 0        |
| IPI00008711 | Wolfraamin                                                              | O76024   |      |      | 0.68 | 0.68 |      | 2  | 3.1  | 4.46E-07 |
| IPI00008726 | Iron regulatory protein 2                                               | P48200   |      | 1.38 |      | 1.38 |      | 3  | 3.6  | 1.69E-10 |
| IPI00008728 | ATP-dependent Clp protease ATP-binding subunit clpX-like, mitochondrial | O76031   |      | 1.04 | 0.91 | 0.98 | 0.09 | 9  | 15.5 | 5.44E-40 |

|             |                                                                |          |      |      |      |      |      |    |      |          |
|-------------|----------------------------------------------------------------|----------|------|------|------|------|------|----|------|----------|
| IPI00008750 | Metallothionein-0                                              | P80294   | 0.67 | 0.65 |      | 0.66 | 0.01 | 2  | 32.8 | 4.21E-16 |
| IPI00008752 | Metallothionein-1G                                             | P13640-1 |      | 0.62 | 0.61 | 0.62 | 0.00 | 3  | 33.9 | 1.43E-24 |
| IPI00008770 | Glutathione S-transferase Mu 4                                 | Q03013-1 |      | 1.18 | 1.01 | 1.10 | 0.12 | 12 | 49.5 | 1.5E-187 |
| IPI00008791 | Probable cytosolic iron-sulfur protein assembly protein CIAO1  | O76071   | 0.88 | 1.21 | 1.05 | 1.05 | 0.17 | 3  | 15   | 6.58E-75 |
| IPI00008800 | Myc-associated zinc finger protein                             | P56270   | 1.03 | 0.77 | 0.93 | 0.91 | 0.13 | 2  | 6.8  | 1.14E-25 |
| IPI00008833 | Jumping translocation breakpoint protein                       | O76095   |      | 1.11 |      | 1.11 |      | 1  | 8.9  | 0.010297 |
| IPI00008868 | MAP1 light chain LC1                                           | P46821   | 0.96 | 1.09 | 1.17 | 1.08 | 0.11 | 33 | 23   | 0        |
| IPI00008918 | Epithelial protein lost in neoplasm                            | Q9UHB6-1 | 0.94 | 1.10 | 1.07 | 1.04 | 0.09 | 24 | 42.4 | 0        |
| IPI00008943 | ATP-dependent RNA helicase DDX19B                              | Q9UMR2-1 |      | 1.50 | 1.41 | 1.46 | 0.06 | 9  | 18.4 | 1.8E-109 |
| IPI00008961 | Telomeric repeat-binding factor 2-interacting protein 1        | Q9NYB0   |      | 1.28 | 1.23 | 1.25 | 0.03 | 2  | 11.8 | 1.85E-64 |
| IPI00008964 | Ras-related protein Rab-1B                                     | Q9H0U4   | 1.01 | 1.12 | 1.21 | 1.11 | 0.10 | 15 | 75.1 | 8.2E-269 |
| IPI00008965 | Activator protein 1                                            | P05412   | 0.90 | 1.06 |      | 0.98 | 0.11 | 4  | 15.4 | 1.06E-79 |
| IPI00008982 | Aldehyde dehydrogenase family 18 member A1                     | P54886-1 | 0.84 | 0.98 | 0.95 | 0.92 | 0.07 | 24 | 36.1 | 1.8E-166 |
| IPI00008991 | Down-regulator of transcription 1                              | Q01658   | 1.06 | 1.17 | 1.04 | 1.09 | 0.07 | 4  | 17.6 | 2.49E-09 |
| IPI00008998 | Butyrate-induced protein 1                                     | Q9P035   | 1.20 |      | 0.71 | 0.96 | 0.35 | 2  | 5.8  | 3.29E-10 |
| IPI00009009 | Protein CWC15 homolog                                          | Q9P013   | 1.25 | 1.03 | 1.01 | 1.10 | 0.13 | 6  | 28.4 | 1.43E-85 |
| IPI00009010 | TRM112-like protein                                            | Q9UI30   | 0.75 | 1.02 | 1.00 | 0.92 | 0.15 | 5  | 49.6 | 7.99E-85 |
| IPI00009032 | La autoantigen                                                 | P05455   | 1.06 | 1.05 | 1.07 | 1.06 | 0.01 | 31 | 56.1 | 0        |
| IPI00009057 | GAP SH3 domain-binding protein 2                               | Q9UN86-1 | 1.03 | 1.01 | 1.12 | 1.05 | 0.06 | 11 | 28.2 | 8.8E-156 |
| IPI00009070 | ERFS                                                           | Q9Y450-1 | 1.22 | 0.80 | 0.93 | 0.98 | 0.21 | 8  | 18.4 | 8.8E-119 |
| IPI00009104 | 48 kDa TATA box-binding protein-interacting protein            | Q9Y230   | 0.92 | 0.94 | 0.95 | 0.94 | 0.01 | 25 | 56.4 | 0        |
| IPI00009111 | ST4 oncofetal antigen                                          | Q13641   | 1.70 | 1.65 | 1.89 | 1.75 | 0.12 | 4  | 14   | 4.7E-182 |
| IPI00009123 | DNA-binding protein NEFA                                       | P80303-1 | 1.20 | 1.04 | 1.10 | 1.11 | 0.08 | 5  | 15.5 | 6.3E-119 |
| IPI00009137 | Cleavage and polyadenylation specificity factor 30 kDa subunit | O95639-1 |      | 1.14 | 0.96 | 1.05 | 0.12 | 5  | 21.9 | 5.35E-72 |
| IPI00009146 | Protein FLN29                                                  | O14545   |      | 1.24 | 0.89 | 1.06 | 0.25 | 3  | 5.8  | 2.32E-49 |
| IPI00009148 | Diadenosine 5,5'-P1,P6-hexaphosphate hydrolase 1               | O95989   | 1.11 | 0.99 | 1.20 | 1.10 | 0.10 | 4  | 23.3 | 2.93E-29 |
| IPI00009210 | Dual specificity protein phosphatase 12                        | Q9UNI6   | 0.85 | 1.19 | 0.99 | 1.01 | 0.17 | 4  | 13.8 | 3.9E-14  |

|             |                                                                    |          |      |      |      |      |      |    |      |          |
|-------------|--------------------------------------------------------------------|----------|------|------|------|------|------|----|------|----------|
| IPI00009225 | Syntaxin-8                                                         | Q9UNK0   | 1.09 | 1.08 | 1.08 | 1.09 | 0.01 | 6  | 39   | 1.7E-136 |
| IPI00009236 | Caveolin-1                                                         | Q03135-1 | 1.26 | 1.04 | 1.41 | 1.24 | 0.19 | 7  | 44.9 | 1.3E-103 |
| IPI00009253 | Alpha-soluble NSF attachment protein                               | P54920   | 0.87 | 1.16 | 1.14 | 1.06 | 0.16 | 16 | 64.4 | 5.4E-234 |
| IPI00009274 | Coatomer subunit zeta-2                                            | Q9P299   |      |      | 1.09 | 1.09 |      | 1  | 9    | 7.5E-204 |
| IPI00009276 | Activated protein C receptor                                       | Q9UNN8   |      | 0.73 | 1.01 | 0.87 | 0.20 | 2  | 9.5  | 7.48E-54 |
| IPI00009286 | ALL-1                                                              | Q03164-1 | 1.40 | 0.95 | 0.51 | 0.95 | 0.44 | 2  | 1.1  | 3.18E-22 |
| IPI00009301 | COP9 signalosome complex subunit 7b                                | Q9H9Q2-1 | 1.08 | 1.05 | 1.10 | 1.08 | 0.02 | 5  | 20.5 | 1.5E-100 |
| IPI00009305 | Glucosamine-6-phosphate deaminase 1                                | P46926   | 1.07 | 1.26 | 1.24 | 1.19 | 0.11 | 7  | 23.5 | 2.26E-85 |
| IPI00009315 | Acyl-CoA-binding domain-containing protein 3                       | Q9H3P7   | 0.98 | 1.03 | 0.99 | 1.00 | 0.03 | 9  | 29.4 | 1E-283   |
| IPI00009316 | Cyclophilin E                                                      | Q9UNP9-1 |      |      | 1.16 | 1.16 |      | 5  | 19.6 | 4.95E-18 |
| IPI00009328 | ATP-dependent RNA helicase DDX48                                   | P38919   | 1.06 | 1.11 | 1.17 | 1.11 | 0.05 | 21 | 38.4 | 8.8E-173 |
| IPI00009329 | Dystrophin-related protein 1                                       | P46939   | 0.99 | 1.15 | 1.15 | 1.10 | 0.09 | 24 | 11.4 | 7.9E-264 |
| IPI00009335 | Brain protein 16                                                   | Q9BTY7   | 0.73 | 0.73 | 0.70 | 0.72 | 0.02 | 6  | 19.5 | 8.72E-21 |
| IPI00009342 | p195                                                               | P46940   | 1.08 | 1.18 | 1.26 | 1.17 | 0.09 | 48 | 37.9 | 0        |
| IPI00009365 | Cytochrome c oxidase assembly protein COX16 homolog, mitochondrial | Q9P0S2   |      | 0.77 | 0.63 | 0.70 | 0.09 | 1  | 13.2 | 2.02E-16 |
| IPI00009368 | Sideroflexin-1                                                     | Q9H9B4   | 0.81 | 0.86 | 0.92 | 0.86 | 0.06 | 8  | 30.4 | 1.25E-86 |
| IPI00009373 | Chromatin modification-related protein MEAF6                       | Q9HAF1-3 |      | 1.18 |      | 1.18 |      | 1  | 6.5  | 0.004385 |
| IPI00009374 | GSK3-beta interaction protein                                      | Q9P0R6   | 0.93 |      |      | 0.93 |      | 2  | 15.1 | 1.16E-08 |
| IPI00009407 | Defender against cell death 1                                      | P61803   | 0.81 | 0.99 | 1.02 | 0.94 | 0.11 | 3  | 26.5 | 6.28E-28 |
| IPI00009456 | 5-nucleotidase                                                     | P21589   | 0.80 | 1.49 | 1.25 | 1.18 | 0.35 | 7  | 16   | 7.97E-76 |
| IPI00009464 | Autoantigen PM/Scl 2                                               | Q01780-1 | 0.86 | 1.32 | 1.05 | 1.08 | 0.23 | 15 | 23.4 | 6.9E-174 |
| IPI00009471 | WD repeat-containing protein 3                                     | Q9UNX4   | 0.85 | 0.97 | 0.86 | 0.89 | 0.07 | 8  | 14.6 | 5.12E-41 |
| IPI00009480 | COP9 homolog                                                       | Q99627   | 1.00 | 0.99 | 1.03 | 1.01 | 0.02 | 5  | 34.9 | 3.2E-188 |
| IPI00009505 | 59 kDa dystrophin-associated protein A1 basic component 2          | Q13425-1 |      | 0.80 | 1.42 | 1.11 | 0.44 | 3  | 9.6  | 9.07E-19 |
| IPI00009542 | 11B6                                                               | Q9UNF1-1 | 0.99 | 1.61 | 1.38 | 1.32 | 0.32 | 18 | 36   | 0        |
| IPI00009607 | Ras-related protein Rap-2c                                         | Q9Y3L5   | 1.09 | 1.12 | 1.01 | 1.07 | 0.06 | 5  | 34.4 | 1.76E-40 |
| IPI00009634 | Sulfide:quinone oxidoreductase, mitochondrial                      | Q9Y6N5   |      | 1.74 |      | 1.74 |      | 2  | 7.8  | 0.002489 |
| IPI00009659 | Cell cycle-related and expression-elevated protein in tumor        | Q9NQG5   | 1.03 | 1.10 | 1.11 | 1.08 | 0.04 | 12 | 44.8 | 0        |
| IPI00009668 | Centromere protein H                                               | Q9H3R5   | 1.06 | 1.00 |      | 1.03 | 0.04 | 2  | 14.2 | 1.27E-88 |

|             |                                                                                  |          |      |      |      |      |      |    |      |          |
|-------------|----------------------------------------------------------------------------------|----------|------|------|------|------|------|----|------|----------|
| IPI00009680 | 39S ribosomal protein L44, mitochondrial                                         | Q9H9J2   | 0.92 | 0.99 | 1.04 | 0.98 | 0.06 | 8  | 26.2 | 3.6E-121 |
| IPI00009688 | 1-phosphatidylinositol-5-phosphate 4-kinase 2-alpha                              | P48426   | 1.10 | 0.84 |      | 0.97 | 0.18 | 3  | 7.4  | 7.99E-30 |
| IPI00009700 | Rab-like protein 5                                                               | Q9H7X7-1 | 1.01 |      |      | 1.01 |      | 2  | 13.5 | 0.008085 |
| IPI00009726 | Nicotinamide mononucleotide adenylyltransferase 1                                | Q9HAN9   |      | 1.44 |      | 1.44 |      | 4  | 16.1 | 3.91E-07 |
| IPI00009737 | Ras-related GTP-binding protein D                                                | Q9NQL2-1 |      | 1.46 |      | 1.46 |      | 2  | 5.2  | 0.007831 |
| IPI00009747 | Lanosterol cyclase                                                               | P48449   | 1.69 | 1.66 | 1.63 | 1.66 | 0.03 | 16 | 27.2 | 5.9E-100 |
| IPI00009771 | Lamin-B2                                                                         | Q03252   | 1.27 | 1.05 | 1.12 | 1.14 | 0.11 | 43 | 62.7 | 0        |
| IPI00009790 | 6-phosphofructokinase type C                                                     | Q01813   | 0.87 | 1.04 | 0.98 | 0.96 | 0.09 | 25 | 36.1 | 0        |
| IPI00009803 | CD49 antigen-like family member D                                                | P13612   | 1.05 | 1.18 | 1.02 | 1.08 | 0.08 | 2  | 1.7  | 7.12E-05 |
| IPI00009805 | Homologous-pairing protein 2 homolog                                             | Q9P2W1-1 | 1.01 |      | 1.28 | 1.15 | 0.20 | 2  | 13.8 | 2.37E-53 |
| IPI00009822 | Signal recognition particle 54 kDa protein                                       | P61011   | 0.92 | 1.11 | 0.97 | 1.00 | 0.09 | 14 | 35.7 | 0        |
| IPI00009841 | cDNA FLJ31747 fis, clone NT2RI2007377, highly similar to RNA-BINDING PROTEIN EWS | Q96MX4   | 1.33 | 0.99 | 0.99 | 1.10 | 0.20 | 5  | 10.9 | 7E-189   |
| IPI00009885 | 19 kDa FK506-binding protein                                                     | Q9NYL4   | 0.93 | 1.00 | 1.08 | 1.00 | 0.07 | 4  | 14.4 | 2.83E-62 |
| IPI00009896 | Epoxide hydratase                                                                | P07099   | 1.18 | 1.37 | 1.34 | 1.30 | 0.10 | 4  | 15.6 | 2.96E-35 |
| IPI00009901 | Nuclear transport factor 2                                                       | P61970   | 0.90 | 1.12 | 1.10 | 1.04 | 0.12 | 5  | 56.7 | 1.74E-61 |
| IPI00009904 | Endoplasmic reticulum resident protein 70                                        | P13667   | 1.10 | 1.09 | 1.22 | 1.14 | 0.07 | 35 | 51.9 | 1.1E-293 |
| IPI00009906 | ARM protein lost in epithelial cancers on chromosome X 3                         | Q9UH62   | 0.99 | 1.23 | 1.40 | 1.21 | 0.20 | 6  | 19.5 | 2.86E-86 |
| IPI00009908 | ARM protein lost in epithelial cancers on chromosome X 1                         | Q9P291   | 1.31 |      | 1.24 | 1.27 | 0.05 | 2  | 7.9  | 3.22E-15 |
| IPI00009922 | SRA stem-loop-interacting RNA-binding protein, mitochondrial                     | Q9GZT3   | 0.80 | 0.81 | 0.80 | 0.80 | 0.00 | 8  | 68.8 | 2E-75    |
| IPI00009923 | Procollagen-proline,2-oxoglutarate-4-dioxygenase subunit alpha-1                 | P13674-1 | 1.35 | 1.08 |      | 1.21 | 0.19 | 20 | 41.4 | 9.4E-298 |
| IPI00009943 | Tumor protein, translationally-controlled 1                                      | Q5W0H4   | 0.72 | 0.75 | 0.76 | 0.74 | 0.02 | 11 | 70.7 | 1.3E-130 |
| IPI00009946 | Mitochondrial import receptor subunit TOM34                                      | Q15785   | 0.82 | 1.04 | 0.89 | 0.92 | 0.11 | 13 | 58.3 | 0        |
| IPI00009949 | Proteasome inhibitor PI31 subunit                                                | Q92530   | 1.00 | 1.08 | 0.94 | 1.01 | 0.07 | 6  | 38   | 1.35E-46 |
| IPI00009950 | Glycoprotein GP36b                                                               | Q12907   | 1.01 | 1.26 | 1.44 | 1.24 | 0.22 | 5  | 12.9 | 8.5E-18  |
| IPI00009958 | COP9 signalosome complex subunit 5                                               | Q92905   | 0.96 | 1.11 | 1.11 | 1.06 | 0.09 | 8  | 26.3 | 2.76E-66 |
| IPI00009960 | Cell proliferation-inducing gene 4/52 protein                                    | Q16891-1 | 0.93 | 0.96 | 1.00 | 0.97 | 0.03 | 29 | 40.4 | 0        |

|             |                                                                                 |          |      |      |      |      |      |    |      |          |
|-------------|---------------------------------------------------------------------------------|----------|------|------|------|------|------|----|------|----------|
| IPI00009976 | Interleukin-1 receptor-like 1 ligand                                            | Q13445   | 1.20 | 1.08 | 1.24 | 1.17 | 0.09 | 4  | 22   | 2.05E-35 |
| IPI00010080 | Oxidative stress-responsive 1 protein                                           | O95747   | 1.09 | 1.24 | 1.19 | 1.17 | 0.07 | 11 | 25.8 | 2.2E-190 |
| IPI00010090 | Gamma-ECS regulatory subunit                                                    | P48507   | 0.76 | 1.05 | 0.95 | 0.92 | 0.15 | 6  | 28.8 | 9.5E-127 |
| IPI00010105 | B(2)GCN homolog                                                                 | P56537   | 0.88 | 1.07 | 0.96 | 0.97 | 0.10 | 8  | 50.6 | 1.2E-229 |
| IPI00010130 | Glutamate decarboxylase                                                         | P15104   | 0.54 | 0.91 | 0.63 | 0.70 | 0.19 | 3  | 12.9 | 6.32E-65 |
| IPI00010133 | Coronin-1A                                                                      | P31146   | 1.76 | 1.35 | 0.92 | 1.34 | 0.42 | 7  | 21   | 7.66E-35 |
| IPI00010136 | C-terminal-binding protein 2                                                    | P56545-2 | 0.88 | 1.04 | 1.07 | 0.99 | 0.10 | 8  | 7.4  | 1.55E-12 |
| IPI00010141 | Arsenic-transactivated protein                                                  | Q9NRF9   | 1.03 |      | 1.10 | 1.07 | 0.05 | 7  | 49   | 5.95E-80 |
| IPI00010153 | 60S ribosomal protein L17                                                       | P62829   | 0.96 | 0.95 | 0.83 | 0.91 | 0.07 | 7  | 52.1 | 9.4E-181 |
| IPI00010154 | Guanosine diphosphate dissociation inhibitor 1                                  | P31150   | 0.94 | 1.09 | 1.10 | 1.04 | 0.09 | 16 | 43.2 | 3.2E-249 |
| IPI00010157 | Methionine adenosyltransferase 2                                                | P31153   | 0.83 | 0.92 | 0.90 | 0.88 | 0.05 | 16 | 38.5 | 1.2E-141 |
| IPI00010158 | Chromatin accessibility complex 15 kDa protein                                  | Q9NRG0   | 1.09 |      | 1.18 | 1.14 | 0.06 | 2  | 19.8 | 6.81E-46 |
| IPI00010190 | 2,4-dienoyl-CoA reductase 2                                                     | Q9NUI1-1 | 0.90 | 1.48 | 1.00 | 1.13 | 0.31 | 2  | 9.2  | 9.52E-05 |
| IPI00010201 | cDNA FLJ56327, highly similar to 26S proteasome non-ATPase regulatory subunit 8 | B4DX18   | 0.89 | 1.03 | 1.02 | 0.98 | 0.08 | 9  | 28.3 | 2E-40    |
| IPI00010204 | Pre-mRNA-splicing factor SRP20                                                  | P84103   | 1.10 | 1.00 | 0.94 | 1.02 | 0.08 | 13 | 49.4 | 9.5E-203 |
| IPI00010207 | Ubiquitin-fold modifier 1                                                       | P61960   | 0.84 | 1.01 | 0.98 | 0.94 | 0.09 | 2  | 27.1 | 2.14E-10 |
| IPI00010219 | Kinetochore protein Spc25                                                       | Q9HBM1   | 1.23 | 1.24 | 1.23 | 1.23 | 0.00 | 7  | 39.7 | 1.5E-153 |
| IPI00010232 | Peroxin-3                                                                       | P56589   |      | 1.08 | 0.63 | 0.85 | 0.32 | 2  | 7.5  | 0.00472  |
| IPI00010244 | 28S ribosomal protein S11, mitochondrial                                        | P82912-1 | 0.74 |      | 0.96 | 0.85 | 0.16 | 4  | 22.2 | 2.49E-74 |
| IPI00010252 | E3 ubiquitin-protein ligase TRIM33                                              | Q9UPN9-1 | 1.43 | 1.09 | 0.97 | 1.16 | 0.24 | 4  | 3.3  | 1.21E-17 |
| IPI00010270 | GX                                                                              | P15153   | 0.91 | 1.10 | 1.05 | 1.02 | 0.10 | 10 | 54.7 | 8E-137   |
| IPI00010278 | 28S ribosomal protein S30, mitochondrial                                        | Q9NP92   | 1.04 | 0.93 | 0.93 | 0.97 | 0.06 | 3  | 14.6 | 1.8E-102 |
| IPI00010320 | Chromobox protein homolog 1                                                     | P83916   | 1.19 |      |      | 1.19 |      | 12 | 45.9 | 0        |
| IPI00010346 | Angiotensin-binding protein                                                     | Q9BYT8   | 0.77 | 0.98 | 0.97 | 0.91 | 0.12 | 8  | 14.8 | 4.02E-51 |
| IPI00010348 | Acid DNase                                                                      | O00115   |      | 1.07 |      | 1.07 |      | 2  | 5.3  | 3.39E-05 |
| IPI00010349 | Aging-associated gene 5 protein                                                 | O00116   | 0.80 | 0.92 | 0.97 | 0.90 | 0.09 | 15 | 30.1 | 6.1E-265 |
| IPI00010388 | Centromere protein B                                                            | P07199   | 1.39 |      | 1.38 | 1.38 | 0.01 | 2  | 4    | 3.43E-10 |
| IPI00010400 | 1-phosphatidylinositol-4,5-bisphosphate phosphodiesterase beta-3                | Q01970   | 1.11 | 1.14 | 0.91 | 1.05 | 0.12 | 9  | 11.8 | 1.8E-232 |
| IPI00010402 | Putative uncharacterized protein                                                | Q86Z22   | 1.02 | 1.17 | 1.13 | 1.11 | 0.08 | 6  | 18.1 | 7.2E-114 |

|             |                                                             |          |      |      |      |      |      |    |      |          |
|-------------|-------------------------------------------------------------|----------|------|------|------|------|------|----|------|----------|
| IPI00010404 | Pre-mRNA-splicing factor SF3b 10 kDa subunit                | Q9BWJ5   | 1.09 | 0.96 | 0.93 | 0.99 | 0.08 | 3  | 45.3 | 4.53E-52 |
| IPI00010414 | C-terminal LIM domain protein 1                             | O00151   | 1.07 | 0.99 | 0.97 | 1.01 | 0.05 | 17 | 64.4 | 1.5E-217 |
| IPI00010415 | Acyl-CoA thioesterase 7                                     | O00154-1 | 0.99 | 1.05 | 0.99 | 1.01 | 0.03 | 16 | 40.5 | 0        |
| IPI00010427 | Transmembrane protein 93                                    | Q9BV81   | 0.91 | 0.93 |      | 0.92 | 0.02 | 2  | 20   | 0.000113 |
| IPI00010428 | Cell division cycle-associated protein 3                    | Q99618   | 1.36 |      |      | 1.36 |      | 3  | 23.9 | 6.63E-79 |
| IPI00010438 | Synaptosomal-associated protein 23                          | O00161-1 | 1.29 | 1.17 | 1.10 | 1.19 | 0.10 | 11 | 65.9 | 0        |
| IPI00010460 | Aryl-hydrocarbon receptor interacting protein               | A3RDR9   |      | 1.31 |      | 1.31 |      | 1  | 26.5 | 7.99E-33 |
| IPI00010463 | GTP-binding protein 1                                       | O00178   | 0.95 | 1.10 | 1.17 | 1.07 | 0.11 | 4  | 12.7 | 2.68E-26 |
| IPI00010544 | Protein incorporated later into tight junctions             | Q5JTD0-1 |      |      | 1.02 | 1.02 |      | 2  | 4.7  | 0.002778 |
| IPI00010586 | Androgen receptor coactivator 160 kDa protein               | P82094-2 | 0.97 | 1.15 | 1.10 | 1.07 | 0.09 | 3  | 4    | 5.63E-24 |
| IPI00010676 | Monocyte activation antigen Mo3                             | Q03405-1 | 0.48 | 0.48 | 0.50 | 0.49 | 0.01 | 4  | 18.2 | 4.2E-14  |
| IPI00010700 | HLA-B-associated transcript 2                               | P48634-1 | 1.52 | 0.89 | 0.82 | 1.08 | 0.38 | 11 | 9.6  | 1.26E-80 |
| IPI00010706 | Glutathione synthase                                        | P48637   | 1.07 | 1.19 | 1.09 | 1.12 | 0.06 | 11 | 27.6 | 4.8E-132 |
| IPI00010717 | Mevalonate kinase                                           | Q03426   |      |      | 2.04 | 2.04 |      | 2  | 10.4 | 5.1E-15  |
| IPI00010720 | CCT-epsilon                                                 | P48643   | 0.86 | 0.98 | 0.95 | 0.93 | 0.06 | 32 | 58.2 | 1.5E-288 |
| IPI00010740 | 100 kDa DNA-pairing protein                                 | P23246-1 | 1.09 | 0.92 | 0.92 | 0.98 | 0.10 | 33 | 40.6 | 0        |
| IPI00010779 | TM30p1                                                      | P67936-1 | 1.00 | 0.96 | 1.00 | 0.98 | 0.02 | 42 | 86.3 | 0        |
| IPI00010796 | Cellular thyroid hormone-binding protein                    | P07237   | 1.22 | 1.06 | 1.15 | 1.15 | 0.08 | 38 | 70.3 | 0        |
| IPI00010800 | Nestin                                                      | P48681   | 1.38 | 0.92 | 1.26 | 1.19 | 0.24 | 3  | 2    | 0.000653 |
| IPI00010810 | Electron transfer flavoprotein subunit alpha, mitochondrial | P13804   | 0.89 | 1.01 | 1.05 | 0.99 | 0.08 | 12 | 48.3 | 2.8E-215 |
| IPI00010833 | Transcription factor ZBP-89                                 | Q9UQR1   | 1.38 | 0.76 |      | 1.07 | 0.44 | 2  | 4.7  | 2.43E-54 |
| IPI00010845 | Complex I-23kD                                              | O00217   | 1.03 | 0.97 | 1.03 | 1.01 | 0.04 | 4  | 17.6 | 4.6E-147 |
| IPI00010860 | 26S proteasome non-ATPase regulatory subunit 9              | O00233-1 | 1.12 | 1.00 | 1.05 | 1.06 | 0.06 | 11 | 50.7 | 6.4E-161 |
| IPI00010863 | Copper transport protein ATOX1                              | O00244   | 1.15 |      | 1.07 | 1.11 | 0.06 | 4  | 45.6 | 9.83E-08 |
| IPI00010882 | DNA fragmentation factor 45 kDa subunit                     | O00273-1 |      | 0.90 | 0.89 | 0.89 | 0.01 | 7  | 26.6 | 2.32E-90 |
| IPI00010896 | Chloride channel ABP                                        | O00299   | 0.96 | 1.10 | 1.07 | 1.04 | 0.07 | 17 | 77.2 | 0        |
| IPI00010948 | Acid finger protein                                         | Q12899   | 1.09 | 1.33 | 1.15 | 1.19 | 0.12 | 3  | 9.1  | 8.87E-24 |
| IPI00011069 | Uracil-DNA glycosylase                                      | P13051-1 | 1.01 | 0.95 |      | 0.98 | 0.04 | 2  | 17.3 | 5.42E-23 |
| IPI00011102 | Casein kinase I isoform delta                               | P48730-1 |      | 1.51 | 1.13 | 1.32 | 0.27 | 3  | 9.4  | 9.37E-13 |

|             |                                                                                    |          |      |      |      |      |      |    |      |          |
|-------------|------------------------------------------------------------------------------------|----------|------|------|------|------|------|----|------|----------|
| IPI00011107 | ICD-M                                                                              | P48735   | 0.82 | 1.34 | 1.40 | 1.19 | 0.32 | 10 | 27   | 9.4E-31  |
| IPI00011115 | Basic transcription element-binding protein 4                                      | Q9BXX1   | 0.83 | 0.87 | 0.92 | 0.87 | 0.04 | 3  | 21.4 | 4.9E-181 |
| IPI00011118 | Putative uncharacterized protein RRM2                                              | C9JXC1   | 1.13 | 1.66 | 1.47 | 1.42 | 0.27 | 12 | 30.3 | 5.8E-141 |
| IPI00011126 | 26S protease regulatory subunit 4                                                  | P62191   | 1.00 | 1.01 | 1.05 | 1.02 | 0.03 | 23 | 48.4 | 0        |
| IPI00011200 | D-3-phosphoglycerate dehydrogenase                                                 | O43175   | 0.93 | 1.07 | 1.12 | 1.04 | 0.10 | 18 | 45.8 | 0        |
| IPI00011201 | Malic enzyme 2                                                                     | P23368   | 0.83 | 0.94 | 0.92 | 0.90 | 0.06 | 10 | 27.1 | 3.56E-84 |
| IPI00011209 | BTB/POZ domain-containing protein KCTD10                                           | Q9H3F6-1 | 0.69 | 1.40 |      | 1.05 | 0.50 | 2  | 6.5  | 4.09E-05 |
| IPI00011217 | Complex I-18 kDa                                                                   | O43181   |      |      | 1.08 | 1.08 |      | 2  | 14.9 | 1.83E-08 |
| IPI00011229 | Cathepsin D                                                                        | P07339   | 0.91 | 0.94 | 1.07 | 0.97 | 0.09 | 11 | 32.5 | 7E-158   |
| IPI00011250 | Ubiquitin carboxyl-terminal hydrolase isozyme L3                                   | P15374   | 0.93 | 0.96 | 0.96 | 0.95 | 0.01 | 8  | 50.9 | 5E-172   |
| IPI00011253 | 40S ribosomal protein S3                                                           | P23396   | 0.82 | 0.85 | 0.85 | 0.84 | 0.02 | 22 | 77.8 | 8.2E-303 |
| IPI00011268 | Autoantigen p542                                                                   | Q9UKM9-1 | 1.16 | 1.09 | 1.12 | 1.12 | 0.04 | 19 | 58   | 5E-208   |
| IPI00011274 | AU-rich element RNA-binding factor                                                 | O14979-1 | 1.08 | 0.93 | 0.96 | 0.99 | 0.08 | 12 | 26.7 | 4.1E-176 |
| IPI00011276 | 2-oxoisovalerate dehydrogenase subunit beta, mitochondrial                         | P21953   | 0.88 |      | 1.26 | 1.07 | 0.27 | 2  | 8.2  | 2.68E-27 |
| IPI00011284 | Catechol O-methyltransferase                                                       | P21964-1 | 0.98 | 1.13 | 1.09 | 1.07 | 0.08 | 6  | 25.5 | 5.91E-64 |
| IPI00011285 | Calcium-activated neutral proteinase 1                                             | P07384   | 1.14 | 1.32 | 1.24 | 1.23 | 0.09 | 22 | 36.4 | 3.3E-183 |
| IPI00011302 | 1F5 antigen                                                                        | P13987   | 1.11 | 1.00 | 1.08 | 1.07 | 0.06 | 6  | 28.1 | 6E-121   |
| IPI00011307 | Bifunctional methylenetetrahydrofolate dehydrogenase/cyclohydrolase, mitochondrial | P13995   | 0.68 | 0.68 | 0.75 | 0.71 | 0.04 | 6  | 24.3 | 3.15E-81 |
| IPI00011416 | Delta(3,5)-Delta(2,4)-dienoyl-CoA isomerase, mitochondrial                         | Q13011   | 0.95 | 1.10 | 1.12 | 1.06 | 0.10 | 9  | 33.2 | 7.6E-122 |
| IPI00011454 | Alpha-glucosidase 2                                                                | Q14697-2 | 1.10 | 1.06 | 1.13 | 1.10 | 0.04 | 47 | 52.9 | 0        |
| IPI00011461 | Cell cycle autoantigen SG2NA                                                       | Q13033-1 |      |      | 1.01 | 1.01 |      | 3  | 3.9  | 3.95E-12 |
| IPI00011488 | Mammalian STE20-like protein kinase 1                                              | Q13043-1 | 0.80 | 0.94 | 0.86 | 0.87 | 0.07 | 5  | 13.8 | 2.35E-40 |
| IPI00011511 | Cat eye syndrome critical region protein 5                                         | Q9BXW7-1 | 1.30 | 0.80 | 0.83 | 0.97 | 0.28 | 7  | 20.3 | 3.97E-37 |
| IPI00011528 | CF-1 50 kDa subunit                                                                | Q05048   | 0.81 | 1.08 | 3.24 | 1.71 | 1.33 | 4  | 10.2 | 2.5E-22  |
| IPI00011590 | Fos-related antigen 1                                                              | P15407   | 0.87 |      | 0.80 | 0.83 | 0.05 | 2  | 11.4 | 5.36E-08 |
| IPI00011592 | Cytoplasmic dynein 1 light intermediate chain 2                                    | O43237   | 0.95 | 1.29 | 0.99 | 1.08 | 0.18 | 6  | 15.9 | 4.73E-96 |
| IPI00011603 | 26S proteasome non-ATPase regulatory subunit 3                                     | O43242   | 1.10 | 0.95 | 1.02 | 1.02 | 0.07 | 26 | 48.7 | 0        |



|             |                                                                                                              |          |      |      |      |      |      |    |      |          |
|-------------|--------------------------------------------------------------------------------------------------------------|----------|------|------|------|------|------|----|------|----------|
| IPI00011604 | Glycine cleavage system H protein, mitochondrial                                                             | P23434   | 1.02 | 0.94 |      | 0.98 | 0.06 | 1  | 5.8  | 0.000149 |
| IPI00011609 | E6AP ubiquitin-protein ligase                                                                                | Q05086-1 | 0.79 | 1.02 | 0.93 | 0.91 | 0.12 | 5  | 6.7  | 3E-103   |
| IPI00011619 | 3-phosphoadenosine-5-phosphosulfate synthase                                                                 | O43252   | 1.04 | 1.26 | 1.18 | 1.16 | 0.11 | 12 | 23.9 | 6.4E-144 |
| IPI00011631 | Centromere/kinetochore protein zw10 homolog                                                                  | O43264   | 0.91 | 0.96 | 0.89 | 0.92 | 0.04 | 10 | 18.9 | 8.3E-172 |
| IPI00011675 | Lysp100b                                                                                                     | P23497-1 |      | 0.94 | 1.22 | 1.08 | 0.20 | 6  | 5.3  | 1.29E-10 |
| IPI00011676 | Neural Wiskott-Aldrich syndrome protein                                                                      | O00401   | 2.09 |      | 1.24 | 1.67 | 0.60 | 4  | 18   | 7.67E-59 |
| IPI00011689 | Calcium/calmodulin-dependent eukaryotic elongation factor 2 kinase                                           | O00418   |      | 0.93 |      | 0.93 |      | 2  | 4.1  | 0.000112 |
| IPI00011698 | 18 kDa Sin3-associated polypeptide                                                                           | O00422   | 1.11 | 1.17 | 1.22 | 1.17 | 0.06 | 6  | 27.9 | 2.5E-156 |
| IPI00011702 | Uncharacterized protein KIAA0406                                                                             | O43156   | 0.88 | 1.14 | 1.09 | 1.04 | 0.14 | 3  | 5.1  | 1.48E-17 |
| IPI00011736 | Phosphatidylinositol 3-kinase 85 kDa regulatory subunit beta                                                 | O00459   | 1.97 | 1.32 | 1.28 | 1.52 | 0.39 | 4  | 11.7 | 1.34E-25 |
| IPI00011770 | Complex I-MLRQ                                                                                               | O00483   | 0.75 | 0.98 | 1.03 | 0.92 | 0.15 | 3  | 37   | 1.2E-14  |
| IPI00011857 | Chromatin assembly factor 1 subunit B                                                                        | Q13112   | 1.00 | 1.23 | 1.19 | 1.14 | 0.12 | 8  | 22.2 | 2.17E-70 |
| IPI00011876 | cDNA FLJ59758, highly similar to S-methyl-5-thioadenosine phosphorylase (EC 2.4.2.28)                        | B4DUC8   | 0.91 | 1.13 | 1.09 | 1.04 | 0.11 | 15 | 54   | 0        |
| IPI00011898 | eIF-2B GDP-GTP exchange factor subunit epsilon                                                               | Q13144   | 0.81 | 1.03 | 1.01 | 0.95 | 0.12 | 6  | 10.3 | 1E-49    |
| IPI00011913 | Heterogeneous nuclear ribonucleoprotein A0                                                                   | Q13151   | 1.09 | 1.06 | 1.14 | 1.10 | 0.04 | 11 | 42   | 1.2E-216 |
| IPI00011919 | FAS-associated death domain protein                                                                          | Q13158   |      | 1.10 | 1.02 | 1.06 | 0.05 | 4  | 23.6 | 3.73E-82 |
| IPI00011937 | Antioxidant enzyme AOE372                                                                                    | Q13162   | 1.04 | 1.06 | 1.05 | 1.05 | 0.01 | 14 | 65.3 | 4.8E-190 |
| IPI00011970 | 17-beta-hydroxysteroid dehydrogenase 7                                                                       | P56937-1 |      | 1.25 |      | 1.25 |      | 2  | 6.2  | 0.000657 |
| IPI00011996 | Uba6-specific E2 conjugating enzyme 1                                                                        | Q9H832-1 | 0.99 | 1.12 | 1.25 | 1.12 | 0.13 | 5  | 13.8 | 2.09E-58 |
| IPI00012007 | Adenosylhomocysteinase                                                                                       | P23526   | 0.88 | 1.03 | 0.99 | 0.97 | 0.08 | 20 | 40   | 9.1E-201 |
| IPI00012011 | 18 kDa phosphoprotein                                                                                        | P23528   | 0.98 | 1.20 | 1.17 | 1.12 | 0.12 | 25 | 85.5 | 0        |
| IPI00012066 | cDNA FLJ77432, highly similar to Homo sapiens poly(rC) binding protein 2 (PCBP2), transcript variant 2, mRNA | A8K7X6   | 0.98 | 1.14 | 1.11 | 1.07 | 0.08 | 15 | 52.5 | 0        |
| IPI00012069 | Azoreductase                                                                                                 | P15559   | 0.81 | 1.66 | 1.99 | 1.49 | 0.61 | 9  | 25.9 | 8.18E-82 |
| IPI00012074 | Heterogeneous nuclear ribonucleoprotein R                                                                    | O43390-1 | 1.09 | 1.04 | 1.10 | 1.08 | 0.03 | 27 | 44.5 | 0        |
| IPI00012079 | Eukaryotic translation initiation factor 4B                                                                  | P23588   | 1.10 | 0.86 | 0.85 | 0.94 | 0.15 | 19 | 32.8 | 6.6E-294 |
| IPI00012149 | M phase phosphoprotein 10                                                                                    | O00566   | 1.15 | 0.89 | 0.90 | 0.98 | 0.14 | 10 | 22.5 | 1.5E-106 |
| IPI00012197 | dCTP pyrophosphatase 1                                                                                       | Q9H773   | 1.04 | 0.89 | 0.87 | 0.93 | 0.09 | 7  | 47.6 | 5.1E-115 |

|             |                                                                                           |          |      |      |      |      |      |    |      |          |
|-------------|-------------------------------------------------------------------------------------------|----------|------|------|------|------|------|----|------|----------|
| IPI00012198 | Uncharacterized protein C1orf50                                                           | Q9BV19   |      |      | 0.90 | 0.90 |      | 1  | 8    | 1.84E-42 |
| IPI00012199 | Coiled-coil domain-containing protein 86                                                  | Q9H6F5   | 0.87 | 0.69 | 0.67 | 0.74 | 0.11 | 5  | 20.6 | 2.01E-17 |
| IPI00012202 | Androgen receptor cofactor p44                                                            | Q9BQA1   | 0.78 | 1.01 | 0.81 | 0.87 | 0.13 | 7  | 22.5 | 4.8E-126 |
| IPI00012215 | UPF0184 protein C9orf16                                                                   | Q9BUW7   | 0.47 |      |      | 0.47 |      | 2  | 30.1 | 3.68E-06 |
| IPI00012268 | 26S proteasome non-ATPase regulatory subunit 2                                            | Q13200   | 0.81 | 0.94 | 0.91 | 0.89 | 0.07 | 37 | 47.7 | 0        |
| IPI00012315 | DR-nm23                                                                                   | Q13232   | 1.19 | 1.24 |      | 1.21 | 0.03 | 2  | 16   | 6.57E-59 |
| IPI00012340 | Pre-mRNA-splicing factor SRp30C                                                           | Q13242   | 0.91 | 0.93 | 0.92 | 0.92 | 0.01 | 16 | 61.1 | 4.8E-99  |
| IPI00012341 | Delayed-early protein HRS                                                                 | Q13243-1 | 1.23 | 1.06 | 1.13 | 1.14 | 0.08 | 7  | 25.4 | 3.7E-71  |
| IPI00012345 | Pre-mRNA-splicing factor SRP55                                                            | Q13247-1 | 1.10 | 0.99 | 1.02 | 1.04 | 0.06 | 13 | 33.4 | 5.95E-65 |
| IPI00012347 | Adhesion protein with leucine-rich repeats and immunoglobulin domains related to perlecan | Q9NR99   |      |      | 0.84 | 0.84 |      | 1  | 0.7  | 0.01653  |
| IPI00012369 | Mitotic arrest deficient 2-like protein 1                                                 | Q13257   | 0.92 | 1.04 | 1.06 | 1.01 | 0.07 | 8  | 32.2 | 4.88E-91 |
| IPI00012382 | U1 small nuclear ribonucleoprotein A                                                      | P09012   | 1.22 | 1.06 | 1.07 | 1.12 | 0.09 | 7  | 29.4 | 6.58E-76 |
| IPI00012426 | Retinoid-inducible serine carboxypeptidase                                                | Q9HB40-1 | 0.82 | 0.79 | 0.77 | 0.80 | 0.02 | 3  | 7.1  | 3.7E-09  |
| IPI00012440 | Alpha-L-fucoside fucohydrolase 2                                                          | Q9BTY2   |      |      | 1.21 | 1.21 |      | 2  | 6.9  | 4.95E-18 |
| IPI00012442 | ATP-dependent DNA helicase VIII                                                           | Q13283   | 1.03 | 0.85 | 0.90 | 0.92 | 0.09 | 19 | 53.4 | 0        |
| IPI00012443 | Acidic fibroblast growth factor intracellular-binding protein                             | O43427-1 | 0.71 | 1.09 |      | 0.90 | 0.27 | 3  | 10.7 | 1.34E-06 |
| IPI00012451 | Guanine nucleotide-binding protein subunit beta-4                                         | Q9HAV0   | 1.16 | 1.49 | 1.29 | 1.31 | 0.16 | 8  | 26.5 | 2.86E-61 |
| IPI00012462 | Putative uncharacterized protein EIF2A                                                    | C9JWR7   | 0.86 | 1.00 |      | 0.93 | 0.10 | 17 | 42   | 1.4E-173 |
| IPI00012490 | Matrix-remodeling-associated protein 1                                                    | P23634-1 | 1.19 | 1.04 | 1.09 | 1.11 | 0.08 | 18 | 17.4 | 3.6E-242 |
| IPI00012497 | Beta-adrenergic receptor kinase 1                                                         | P25098   | 1.38 |      | 1.14 | 1.26 | 0.17 | 4  | 6.7  | 2.41E-36 |
| IPI00012512 | Ras-like protein TC21                                                                     | P62070   | 1.19 | 1.03 | 1.10 | 1.11 | 0.08 | 12 | 47.1 | 9.9E-264 |
| IPI00012535 | DnaJ homolog subfamily A member 1                                                         | P31689   | 0.67 | 0.91 | 0.80 | 0.79 | 0.12 | 20 | 63.5 | 3.5E-271 |
| IPI00012545 | TGN38 homolog                                                                             | O43493-1 | 0.98 |      | 0.96 | 0.97 | 0.02 | 6  | 16.2 | 8.49E-78 |
| IPI00012578 | Importin alpha Q1                                                                         | O00629   | 0.86 | 1.03 | 1.10 | 0.99 | 0.12 | 7  | 21.9 | 4.9E-252 |
| IPI00012585 | Beta-hexosaminidase subunit beta                                                          | P07686   | 1.07 | 0.99 | 1.08 | 1.05 | 0.05 | 16 | 29.7 | 1.9E-102 |
| IPI00012645 | Beta-III spectrin                                                                         | O15020-1 | 1.18 |      |      | 1.18 |      | 8  | 3.3  | 4.74E-18 |
| IPI00012669 | Protein SMG9                                                                              | Q9HOW8-1 | 0.90 | 1.04 | 1.01 | 0.99 | 0.07 | 4  | 15.4 | 9.83E-68 |
| IPI00012728 | Acyl-CoA synthetase 1                                                                     | P33121-1 | 1.12 | 0.91 | 1.03 | 1.02 | 0.10 | 3  | 7.4  | 3.68E-08 |

|             |                                                             |          |      |      |      |      |      |    |      |          |
|-------------|-------------------------------------------------------------|----------|------|------|------|------|------|----|------|----------|
| IPI00012750 | 40S ribosomal protein S25                                   | P62851   | 0.90 | 0.90 | 0.89 | 0.90 | 0.00 | 12 | 49.6 | 1.2E-156 |
| IPI00012756 | Interferon-induced protein with tetratricopeptide repeats 5 | Q13325   | 0.85 | 0.79 | 1.06 | 0.90 | 0.14 | 5  | 11   | 1.53E-59 |
| IPI00012772 | 60S ribosomal protein L8                                    | P62917   | 0.86 | 0.88 | 0.89 | 0.87 | 0.01 | 16 | 45.1 | 5.4E-102 |
| IPI00012788 | A34.5                                                       | O15446-2 | 1.14 | 0.71 | 0.71 | 0.85 | 0.25 | 6  | 21.9 | 2.3E-101 |
| IPI00012795 | eIF3 p36                                                    | Q13347   | 0.70 | 0.92 | 0.88 | 0.83 | 0.12 | 11 | 49.2 | 6.9E-113 |
| IPI00012828 | 3-ketoacyl-CoA thiolase, peroxisomal                        | P09110   | 0.87 | 1.09 | 1.09 | 1.02 | 0.13 | 5  | 13.4 | 4.45E-62 |
| IPI00012831 | Hepatitis B virus X-interacting protein                     | O43504   |      |      | 0.83 | 0.83 |      | 1  | 11.6 | 1.34E-08 |
| IPI00012833 | Protein phosphatase X                                       | P60510   | 0.79 | 1.10 | 1.11 | 1.00 | 0.18 | 6  | 24.4 | 4.6E-121 |
| IPI00012835 | C-terminal-binding protein 1                                | Q13363   | 1.01 | 1.19 | 1.15 | 1.12 | 0.09 | 9  | 23.9 | 4.09E-32 |
| IPI00012837 | Conventional kinesin heavy chain                            | P33176   | 0.93 | 1.06 | 1.08 | 1.02 | 0.08 | 43 | 51.9 | 0        |
| IPI00012855 | Protein PM1                                                 | P17152   | 0.72 | 0.96 | 0.97 | 0.88 | 0.14 | 4  | 19.3 | 1.82E-24 |
| IPI00012866 | Protein kinase B                                            | P31749   | 1.28 | 1.59 | 1.60 | 1.49 | 0.18 | 3  | 9.6  | 1.62E-37 |
| IPI00012887 | Cathepsin L1                                                | P07711   | 0.98 |      |      | 0.98 |      | 1  | 4.2  | 1.29E-09 |
| IPI00012912 | Carnitine O-palmitoyltransferase 2, mitochondrial           | P23786   | 1.04 | 1.08 | 1.23 | 1.12 | 0.10 | 3  | 6.8  | 5.56E-71 |
| IPI00012989 | Lysosomal acid alpha-mannosidase                            | O00754   | 0.84 |      | 0.97 | 0.91 | 0.09 | 5  | 7    | 2.1E-168 |
| IPI00013002 | UbcH10                                                      | O00762   | 0.88 | 0.99 | 1.02 | 0.96 | 0.08 | 5  | 26.3 | 6.99E-63 |
| IPI00013004 | Pyridoxal kinase                                            | O00764-1 | 0.96 | 1.03 | 1.13 | 1.04 | 0.08 | 11 | 33.7 | 7.4E-232 |
| IPI00013068 | eIF-3 p48                                                   | P60228   | 0.81 | 0.91 | 0.91 | 0.88 | 0.06 | 15 | 40.7 | 7.3E-151 |
| IPI00013070 | Adenovirus early region 1B-associated protein 5             | Q9BUJ2-1 | 1.08 | 1.29 | 1.12 | 1.17 | 0.11 | 17 | 29.3 | 7.2E-249 |
| IPI00013079 | Elastin microfibril interface-located protein 1             | Q9Y6C2   |      | 0.83 |      | 0.83 |      | 3  | 5.1  | 9.7E-08  |
| IPI00013122 | Hsp90 chaperone protein kinase-targeting subunit            | Q16543   | 0.98 | 1.05 | 0.95 | 0.99 | 0.05 | 16 | 44.2 | 9.3E-232 |
| IPI00013146 | 28S ribosomal protein S22, mitochondrial                    | P82650   | 1.02 | 0.84 | 0.82 | 0.89 | 0.11 | 11 | 38.6 | 2.81E-78 |
| IPI00013160 | Hepatocellular carcinoma-associated antigen 56              | P41214-1 | 0.91 | 0.88 | 0.94 | 0.91 | 0.03 | 4  | 9.1  | 1.6E-131 |
| IPI00013167 | 28S ribosomal protein S25, mitochondrial                    | P82663   | 1.05 | 0.90 | 0.96 | 0.97 | 0.07 | 6  | 45.1 | 7.32E-34 |
| IPI00013174 | Paraspeckle protein 2                                       | Q96PK6-1 | 0.95 | 0.71 | 0.80 | 0.82 | 0.12 | 12 | 22.7 | 4.1E-242 |
| IPI00013180 | Protein BUD31 homolog                                       | P41223   |      | 1.13 |      | 1.13 |      | 11 | 58.3 | 1.85E-31 |
| IPI00013184 | N-alpha-acetyltransferase 10, NatA catalytic subunit        | P41227   | 0.87 | 0.94 |      | 0.91 | 0.05 | 11 | 41.7 | 2.3E-191 |
| IPI00013195 | 39S ribosomal protein L49, mitochondrial                    | Q13405   | 1.06 | 0.91 | 1.00 | 0.99 | 0.07 | 3  | 23.5 | 9.8E-173 |

|             |                                                                                                                                  |          |      |      |      |      |      |    |      |          |
|-------------|----------------------------------------------------------------------------------------------------------------------------------|----------|------|------|------|------|------|----|------|----------|
| IPI00013212 | C- <i>Src</i> kinase                                                                                                             | P41240   | 1.02 | 1.23 | 1.01 | 1.08 | 0.12 | 4  | 9.6  | 1.8E-23  |
| IPI00013214 | cDNA, FLJ93378, highly similar to Homo sapiens MCM3 minichromosome maintenance deficient 3 ( <i>S. cerevisiae</i> ) (MCM3), mRNA | B2R7C5   | 1.10 | 1.25 | 1.21 | 1.19 | 0.08 | 33 | 42.3 | 0        |
| IPI00013217 | CAAT box DNA-binding protein subunit B                                                                                           | P25208   | 1.15 |      | 1.10 | 1.13 | 0.04 | 2  | 11.6 | 6.5E-36  |
| IPI00013219 | 59 kDa serine/threonine-protein kinase                                                                                           | Q13418   | 0.83 | 1.17 | 1.21 | 1.07 | 0.21 | 15 | 33.4 | 2.16E-39 |
| IPI00013241 | Ubiquitin-like protein 5                                                                                                         | Q9BZL1   | 0.77 | 1.28 | 1.14 | 1.06 | 0.26 | 6  | 43.8 | 4.08E-41 |
| IPI00013269 | Uncharacterized protein C6orf106                                                                                                 | Q9H6K1-1 | 1.24 |      |      | 1.24 |      | 1  | 6.7  | 4.51E-08 |
| IPI00013290 | Hepatoma-derived growth factor 2                                                                                                 | Q7Z4V5-1 | 1.44 | 1.02 | 1.02 | 1.16 | 0.24 | 6  | 12.1 | 2.5E-33  |
| IPI00013296 | 40S ribosomal protein S18                                                                                                        | P62269   | 0.91 | 0.85 | 0.90 | 0.88 | 0.03 | 18 | 58.6 | 4.8E-241 |
| IPI00013297 | 28 kDa heat- and acid-stable phosphoprotein                                                                                      | Q13442   | 1.19 | 0.94 | 0.97 | 1.04 | 0.14 | 11 | 48.6 | 1.9E-273 |
| IPI00013396 | U1 small nuclear ribonucleoprotein C                                                                                             | P09234   |      |      | 1.05 | 1.05 |      | 6  | 31.4 | 7.79E-30 |
| IPI00013404 | Deletion target in pancreatic carcinoma 4                                                                                        | Q13485   |      |      | 0.92 | 0.92 |      | 4  | 12   | 1.65E-05 |
| IPI00013415 | 40S ribosomal protein S7                                                                                                         | P62081   | 0.86 | 0.89 | 0.88 | 0.87 | 0.02 | 17 | 69.6 | 5.3E-173 |
| IPI00013452 | Bifunctional aminoacyl-tRNA synthetase                                                                                           | P07814   | 0.86 | 1.03 | 0.94 | 0.94 | 0.08 | 43 | 37.6 | 0        |
| IPI00013455 | CAP-Gly domain-containing linker protein 1                                                                                       | P30622-3 | 1.23 | 0.82 | 0.75 | 0.93 | 0.26 | 8  | 6.6  | 5.74E-64 |
| IPI00013466 | Arsenical pump-driving ATPase                                                                                                    | O43681   | 1.03 | 0.98 | 0.99 | 1.00 | 0.03 | 10 | 32.8 | 3.5E-129 |
| IPI00013468 | Mitotic checkpoint protein BUB3                                                                                                  | O43684   | 0.91 | 1.04 | 1.00 | 0.98 | 0.07 | 13 | 46.3 | 5.3E-183 |
| IPI00013475 | Tubulin beta-2A chain                                                                                                            | Q13885   | 1.14 | 1.07 | 1.20 | 1.14 | 0.06 | 31 | 76.4 | 0        |
| IPI00013485 | 40S ribosomal protein S2                                                                                                         | P15880   | 0.82 | 0.80 | 0.87 | 0.83 | 0.04 | 13 | 40.3 | 8.2E-114 |
| IPI00013508 | Alpha-actinin cytoskeletal isoform                                                                                               | P12814   |      | 0.92 | 0.94 | 0.93 | 0.02 | 76 | 76.5 | 0        |
| IPI00013678 | Metaxin-1                                                                                                                        | Q13505-1 | 0.86 | 1.14 | 1.03 | 1.01 | 0.14 | 6  | 18   | 3.63E-83 |
| IPI00013679 | Deoxyuridine 5-triphosphate nucleotidohydrolase, mitochondrial                                                                   | P33316-1 | 1.56 | 1.06 |      | 1.31 | 0.35 | 13 | 55.2 | 5.5E-193 |
| IPI00013683 | Tubulin beta-3 chain                                                                                                             | Q13509   | 0.92 | 1.12 | 1.09 | 1.04 | 0.11 | 28 | 63.6 | 0        |
| IPI00013706 | 39S ribosomal protein L20, mitochondrial                                                                                         | Q9BYC9   | 0.91 | 0.94 | 0.95 | 0.94 | 0.02 | 7  | 37.6 | 7.03E-21 |
| IPI00013721 | PRP4 kinase                                                                                                                      | Q13523   |      |      | 0.95 | 0.95 |      | 4  | 5.6  | 2E-34    |
| IPI00013723 | Peptidyl-prolyl cis-trans isomerase NIMA-interacting 1                                                                           | Q13526   | 1.10 | 1.24 | 1.19 | 1.18 | 0.07 | 7  | 43.6 | 8E-262   |
| IPI00013735 | FAST kinase domain-containing protein 2                                                                                          | Q9NYY8-1 |      | 0.35 | 0.85 | 0.60 | 0.35 | 3  | 5.8  | 1.5E-100 |
| IPI00013773 | Cell death protein RIP                                                                                                           | Q13546-1 |      | 1.30 | 0.98 | 1.14 | 0.23 | 9  | 17.1 | 8.37E-93 |
| IPI00013774 | Histone deacetylase 1                                                                                                            | Q13547   | 1.08 | 1.28 | 1.22 | 1.19 | 0.10 | 6  | 19.9 | 3.16E-91 |

|             |                                                     |          |      |      |      |      |      |    |      |          |
|-------------|-----------------------------------------------------|----------|------|------|------|------|------|----|------|----------|
| IPI00013788 | HIV Tat-specific factor 1                           | O43719   | 1.09 | 1.22 | 1.13 | 1.15 | 0.07 | 6  | 8.1  | 4.2E-55  |
| IPI00013789 | Protein NN8-4AG                                     | Q6GMV2   | 1.11 | 1.33 | 1.05 | 1.16 | 0.15 | 4  | 15.8 | 1.87E-21 |
| IPI00013808 | Alpha-actinin-4                                     | O43707   | 0.85 | 0.97 | 0.99 | 0.94 | 0.08 | 84 | 79.4 | 0        |
| IPI00013830 | Nuclear protein SkiP                                | Q13573   | 1.21 | 1.22 | 1.07 | 1.17 | 0.08 | 11 | 25.4 | 4.1E-96  |
| IPI00013832 | GatC-like protein                                   | O43716   | 0.94 | 0.71 | 0.80 | 0.81 | 0.12 | 6  | 55.1 | 2.59E-16 |
| IPI00013847 | Complex III subunit 1                               | P31930   | 0.98 | 1.01 | 0.97 | 0.99 | 0.02 | 19 | 49.8 | 3.2E-299 |
| IPI00013860 | 3-hydroxyisobutyrate dehydrogenase, mitochondrial   | P31937   | 1.09 | 1.34 | 1.32 | 1.25 | 0.14 | 2  | 8.6  | 1.51E-72 |
| IPI00013862 | dTMP kinase                                         | P23919   | 0.91 | 1.24 | 1.17 | 1.11 | 0.17 | 13 | 52.8 | 5.43E-52 |
| IPI00013871 | Ribonucleoside-diphosphate reductase large subunit  | P23921   | 0.95 | 1.31 | 1.18 | 1.15 | 0.18 | 16 | 25.3 | 4.7E-135 |
| IPI00013877 | Heterogeneous nuclear ribonucleoprotein 2H9         | P31942-1 | 1.04 | 0.98 | 0.95 | 0.99 | 0.05 | 8  | 29.5 | 3.7E-226 |
| IPI00013890 | 14-3-3 protein sigma                                | P31947-1 |      | 1.00 | 1.17 | 1.09 | 0.12 | 8  | 25.4 | 5.3E-111 |
| IPI00013891 | Transformer-2 protein homolog A                     | Q13595-1 | 0.90 | 0.99 | 1.00 | 0.96 | 0.06 | 4  | 14.9 | 1.71E-42 |
| IPI00013894 | Hsc70/Hsp90-organizing protein                      | P31948   | 0.96 | 1.00 | 0.97 | 0.98 | 0.02 | 51 | 63.7 | 0        |
| IPI00013895 | Calgizzarin                                         | P31949   | 0.93 | 1.27 | 1.20 | 1.14 | 0.18 | 7  | 56.2 | 9.3E-230 |
| IPI00013917 | 40S ribosomal protein S12                           | P25398   | 0.67 | 0.93 | 0.84 | 0.81 | 0.13 | 12 | 65.2 | 4.5E-160 |
| IPI00013925 | Galactose-1-phosphate uridylyltransferase           | P07902   |      | 0.98 |      | 0.98 |      | 2  | 7.7  | 0.001861 |
| IPI00013930 | Syntaxin-6                                          | O43752   | 1.21 |      |      | 1.21 |      | 2  | 12.9 | 2.7E-07  |
| IPI00013933 | 250/210 kDa paraneoplastic pemphigus antigen        | P15924-1 | 0.70 | 0.89 | 0.75 | 0.78 | 0.09 | 20 | 10.3 | 0        |
| IPI00013940 | Synaptogyrin-1                                      | O43759-1 | 0.96 | 0.80 |      | 0.88 | 0.11 | 2  | 10.3 | 1.87E-11 |
| IPI00013949 | Alpha-SGT                                           | O43765   | 1.06 | 0.84 | 0.99 | 0.96 | 0.11 | 12 | 35.1 | 6.4E-165 |
| IPI00013976 | Laminin B1 chain                                    | P07942   | 1.18 | 1.03 | 1.09 | 1.10 | 0.08 | 8  | 7.7  | 4E-32    |
| IPI00013981 | p61-Yes                                             | P07947   | 1.11 | 1.31 | 1.28 | 1.23 | 0.11 | 6  | 14.9 | 7.62E-21 |
| IPI00014053 | Mitochondrial import receptor subunit TOM40 homolog | O96008-1 | 0.84 | 0.84 | 0.84 | 0.84 | 0.00 | 9  | 36.8 | 8.4E-169 |
| IPI00014068 | p21-activated kinase 4                              | O96013-1 | 1.05 | 1.20 | 1.19 | 1.15 | 0.09 | 6  | 17.1 | 6.5E-99  |
| IPI00014137 | Oxysterol-binding protein-related protein 2         | Q9H1P3-1 | 1.09 |      |      | 1.09 |      | 2  | 5.4  | 0.007699 |
| IPI00014147 | Hepatitis C virus NS5A-transactivated protein 9     | Q15004   |      |      | 1.20 | 1.20 |      | 4  | 40.5 | 4.37E-19 |
| IPI00014149 | Tetratricopeptide repeat protein 35                 | Q15006   | 1.05 | 1.03 | 1.02 | 1.04 | 0.02 | 9  | 34   | 4.8E-155 |
| IPI00014151 | 26S proteasome non-ATPase regulatory subunit 6      | Q15008   |      | 1.04 | 0.96 | 1.00 | 0.06 | 18 | 45.8 | 1.6E-226 |

|             |                                                                         |          |      |      |      |      |      |    |      |          |
|-------------|-------------------------------------------------------------------------|----------|------|------|------|------|------|----|------|----------|
| IPI00014165 | Histone H2A                                                             | Q92646   | 1.12 | 0.90 |      | 1.01 | 0.16 | 1  | 8.7  | 9.77E-09 |
| IPI00014172 | Golgi 4-transmembrane-spanning transporter MTP                          | Q15012   |      |      | 2.01 | 2.01 |      | 2  | 17.2 | 0.00055  |
| IPI00014174 | MORF-related gene X protein                                             | Q15014   | 1.04 | 0.96 | 1.16 | 1.05 | 0.10 | 6  | 20.8 | 1.52E-14 |
| IPI00014194 | UPF0760 protein C2orf29                                                 | Q9UKZ1   | 1.11 |      | 1.05 | 1.08 | 0.04 | 2  | 6.3  | 1.7E-11  |
| IPI00014197 | Protein CDV3 homolog                                                    | Q9UKY7-1 | 1.20 | 0.88 | 0.84 | 0.97 | 0.19 | 9  | 69   | 6.5E-221 |
| IPI00014198 | Exosome complex exonuclease RRP42                                       | Q15024   | 0.89 | 0.89 | 0.89 | 0.89 | 0.00 | 6  | 25.4 | 5E-126   |
| IPI00014213 | Leucine--tRNA ligase                                                    | Q15031   |      | 1.23 | 0.76 | 1.00 | 0.33 | 2  | 2.5  | 1.39E-05 |
| IPI00014219 | Sorting nexin-17                                                        | Q15036   |      | 1.39 | 1.09 | 1.24 | 0.21 | 2  | 7    | 1.04E-22 |
| IPI00014220 | HAUS augmin-like complex subunit 5                                      | O94927-1 |      |      | 1.07 | 1.07 |      | 2  | 3.6  | 5.66E-06 |
| IPI00014230 | Complement component 1 Q subcomponent-binding protein, mitochondrial    | Q07021   | 1.01 | 0.75 | 0.78 | 0.85 | 0.14 | 7  | 28.4 | 3.8E-213 |
| IPI00014232 | ADP-ribosylation factor-like protein 6-interacting protein 1            | Q15041   | 0.91 | 1.02 | 1.19 | 1.04 | 0.14 | 6  | 23.2 | 1.04E-09 |
| IPI00014236 | LIV-1 subfamily of ZIP zinc transporter 4                               | Q15043-1 | 0.71 | 0.74 | 0.80 | 0.75 | 0.05 | 2  | 6.7  | 6.2E-170 |
| IPI00014253 | Ribosome biogenesis regulatory protein homolog                          | Q15050   | 0.72 | 0.80 | 0.76 | 0.76 | 0.04 | 12 | 37.5 | 4.2E-109 |
| IPI00014263 | Eukaryotic translation initiation factor 4H                             | Q15056-1 | 1.05 | 1.02 | 0.97 | 1.01 | 0.04 | 17 | 58.9 | 5.6E-284 |
| IPI00014264 | Arf-GAP with coiled-coil, ANK repeat and PH domain-containing protein 2 | Q15057   |      |      | 1.43 | 1.43 |      | 3  | 4.9  | 5E-47    |
| IPI00014298 | Keratinocyte protein IEF SSP 9502                                       | Q13610   |      | 0.71 | 1.02 | 0.87 | 0.22 | 2  | 6.4  | 5.72E-31 |
| IPI00014301 | Hsa                                                                     | Q15070-1 | 0.80 | 0.90 | 0.86 | 0.86 | 0.05 | 3  | 10.1 | 1.84E-15 |
| IPI00014307 | Myotubularin-related protein 2                                          | Q13614   | 0.90 |      | 0.97 | 0.94 | 0.05 | 2  | 6.4  | 1.92E-21 |
| IPI00014310 | Cullin-1                                                                | Q13616   | 0.86 | 1.03 | 0.19 | 0.69 | 0.45 | 7  | 11.9 | 1.48E-28 |
| IPI00014311 | Cullin-2                                                                | Q13617   | 1.54 | 0.96 | 0.92 | 1.14 | 0.35 | 4  | 4.6  | 0.00031  |
| IPI00014312 | Cullin-3                                                                | Q13618-1 | 0.97 | 1.03 | 0.88 | 0.96 | 0.07 | 14 | 20.3 | 1.4E-160 |
| IPI00014361 | GDP-4-keto-6-deoxy-D-mannose-3,5-epimerase-4-reductase                  | Q13630   | 0.98 | 1.03 | 1.15 | 1.05 | 0.09 | 7  | 26.5 | 3.08E-89 |
| IPI00014377 | Ras-related protein Rab-32                                              | Q13637   | 1.00 | 1.01 | 1.04 | 1.02 | 0.02 | 11 | 58.7 | 6.7E-217 |
| IPI00014399 | Four and a half LIM domains protein 3                                   | Q13643   | 0.89 | 0.80 | 0.78 | 0.82 | 0.06 | 8  | 47.5 | 7.91E-71 |
| IPI00014400 | DnaJ homolog subfamily B member 12                                      | B7Z7I3   |      | 1.06 |      | 1.06 |      | 3  | 11.7 | 0.011848 |
| IPI00014424 | Elongation factor 1-alpha 2                                             | Q05639   | 0.64 | 0.97 | 0.93 | 0.85 | 0.18 | 17 | 34.8 | 5.6E-179 |
| IPI00014439 | Dihydropteridine reductase                                              | P09417   | 0.95 | 1.12 | 1.02 | 1.03 | 0.09 | 8  | 43.9 | 1.4E-194 |

|             |                                                                      |          |      |      |      |      |      |     |      |          |
|-------------|----------------------------------------------------------------------|----------|------|------|------|------|------|-----|------|----------|
| IPI00014454 | Ras and Rab interactor 1                                             | Q13671-1 |      | 1.25 | 0.77 | 1.01 | 0.34 | 7   | 15.1 | 1.7E-124 |
| IPI00014456 | Striatin                                                             | O43815-1 | 1.18 | 1.35 | 1.21 | 1.25 | 0.09 | 7   | 13.7 | 1.3E-152 |
| IPI00014458 | Protein SCO2 homolog, mitochondrial                                  | O43819   |      |      | 0.90 | 0.90 |      | 2   | 10.5 | 1.49E-21 |
| IPI00014474 | A-kinase anchor protein 8                                            | O43823   | 1.49 | 1.02 | 1.12 | 1.21 | 0.25 | 6   | 13.9 | 2.61E-89 |
| IPI00014516 | Caldesmon                                                            | Q05682-1 |      | 0.69 | 0.77 | 0.73 | 0.06 | 48  | 39.3 | 0        |
| IPI00014533 | Autoantigen NOR-90                                                   | P17480-1 | 1.19 | 1.25 | 1.29 | 1.24 | 0.05 | 13  | 21.3 | 4.64E-42 |
| IPI00014572 | Basement-membrane protein 40                                         | P09486   | 1.11 | 1.28 | 1.63 | 1.34 | 0.27 | 7   | 23.4 | 1.98E-39 |
| IPI00014577 | Ras-related protein Rab-18                                           | Q9NP72   | 0.87 | 0.93 | 0.93 | 0.91 | 0.04 | 8   | 45.1 | 2.3E-200 |
| IPI00014587 | Clathrin light chain A                                               | P09496-1 | 1.26 | 1.06 | 1.08 | 1.13 | 0.11 | 9   | 29.8 | 1.2E-142 |
| IPI00014589 | Clathrin light chain B                                               | P09497-1 | 1.34 | 0.90 | 0.95 | 1.06 | 0.24 | 8   | 24.5 | 1.76E-26 |
| IPI00014624 | Adapter-related protein complex 3 sigma-1 subunit                    | Q92572   | 0.97 | 1.05 | 1.04 | 1.02 | 0.04 | 5   | 22.5 | 3E-100   |
| IPI00014808 | PAF acetylhydrolase 29 kDa subunit                                   | Q15102   | 1.31 | 1.11 | 1.05 | 1.16 | 0.14 | 8   | 33.8 | 2.77E-31 |
| IPI00014825 | BTB/POZ domain-containing protein KCTD9                              | Q7L273   | 1.05 |      |      | 1.05 |      | 3   | 9.5  | 6.75E-36 |
| IPI00014831 | [Pyruvate dehydrogenase [lipoamide]] kinase isozyme 1, mitochondrial | Q15118   |      | 1.19 | 0.93 | 1.06 | 0.19 | 3   | 8.5  | 2.15E-35 |
| IPI00014843 | CARMIL homolog                                                       | Q5VZK9-1 |      | 0.96 |      | 0.96 |      | 2   | 1.6  | 0.017378 |
| IPI00014877 | Glutaminyl-peptide cyclotransferase-like protein                     | Q9NXS2-2 | 1.21 |      |      | 1.21 |      | 2   | 5.8  | 3.69E-05 |
| IPI00014898 | Hemidesmosomal protein 1                                             | Q15149-1 | 1.50 | 1.16 | 1.17 | 1.28 | 0.19 | 213 | 50.7 | 0        |
| IPI00014980 | PP2A B subunit isoform B56-beta                                      | Q15173-1 |      |      | 1.15 | 1.15 |      | 3   | 6.8  | 0.000252 |
| IPI00015011 | F-box and leucine-rich repeat protein 12                             | Q9NXK8-1 |      | 1.25 | 1.26 | 1.25 | 0.01 | 2   | 10.4 | 1.1E-125 |
| IPI00015018 | Inorganic pyrophosphatase                                            | Q15181   | 0.88 | 0.94 | 0.91 | 0.91 | 0.03 | 12  | 53.3 | 1.2E-232 |
| IPI00015101 | Torsin family protein C9orf167                                       | Q9NXH8   | 0.99 |      |      | 0.99 |      | 2   | 6.4  | 0.001333 |
| IPI00015102 | Activated leukocyte cell adhesion molecule                           | Q13740-1 | 1.08 | 0.79 | 1.04 | 0.97 | 0.16 | 15  | 31.9 | 9.9E-148 |
| IPI00015143 | Origin recognition complex subunit 5                                 | O43913   |      | 1.59 | 0.97 | 1.28 | 0.44 | 2   | 5.3  | 2.78E-11 |
| IPI00015147 | Activating transcription factor 7                                    | P17544-1 |      |      | 0.84 | 0.84 |      | 2   | 13.4 | 7.87E-06 |
| IPI00015148 | GTP-binding protein smg p21B                                         | P61224   | 0.87 | 1.06 | 1.05 | 0.99 | 0.11 | 13  | 44.6 | 1.2E-242 |
| IPI00015161 | Protein p17                                                          | O43924   | 0.99 | 1.26 |      | 1.12 | 0.19 | 2   | 20.7 | 2.22E-23 |
| IPI00015195 | CF-1 77 kDa subunit                                                  | Q12996   | 1.16 | 1.02 | 1.02 | 1.07 | 0.08 | 9   | 17.6 | 4.35E-92 |
| IPI00015213 | DAP-like kinase                                                      | O43293   | 0.94 |      |      | 0.94 |      | 2   | 6.4  | 6.03E-15 |
| IPI00015285 | CTP:phosphoethanolamine cytidylyltransferase                         | Q99447   | 1.55 | 1.67 | 1.94 | 1.72 | 0.20 | 6   | 19.5 | 1.96E-64 |

|             |                                                                                    |          |      |      |      |      |      |    |      |          |
|-------------|------------------------------------------------------------------------------------|----------|------|------|------|------|------|----|------|----------|
| IPI00015351 | UPF0424 protein C1orf128                                                           | Q9GZP4-1 | 0.90 | 1.16 | 1.41 | 1.15 | 0.26 | 3  | 20.4 | 1.48E-09 |
| IPI00015361 | C-Myc-binding protein Mm-1                                                         | Q99471   | 0.96 |      | 0.98 | 0.97 | 0.01 | 5  | 31.8 | 2E-191   |
| IPI00015602 | Mitochondrial import receptor subunit TOM70                                        | O94826   | 0.72 | 0.95 | 0.87 | 0.85 | 0.12 | 18 | 37.5 | 9.9E-156 |
| IPI00015609 | DDB1- and CUL4-associated factor 16                                                | Q9NXF7   | 1.10 | 1.10 | 0.84 | 1.01 | 0.15 | 4  | 19.4 | 1.63E-37 |
| IPI00015671 | Tubulin alpha chain-like 3                                                         | A6NHL2-1 | 0.98 |      |      | 0.98 |      | 5  | 10.3 | 1.23E-53 |
| IPI00015713 | CDK5 regulatory subunit-associated protein 1-like 1                                | Q5VV42-1 | 0.62 | 0.35 | 0.80 | 0.59 | 0.23 | 3  | 6.7  | 2.06E-08 |
| IPI00015736 | ThiFP1                                                                             | Q9GZZ9-1 | 0.89 | 0.57 | 0.79 | 0.75 | 0.16 | 4  | 15.6 | 7.33E-63 |
| IPI00015773 | COMM domain-containing protein 3                                                   | Q9UBI1   | 1.64 | 1.26 | 1.15 | 1.35 | 0.26 | 4  | 27.7 | 1.16E-20 |
| IPI00015806 | General transcription factor 3C polypeptide 3                                      | Q9Y5Q9-1 |      | 1.36 | 1.25 | 1.31 | 0.08 | 4  | 6.5  | 2.34E-42 |
| IPI00015808 | Autoantigen NGP-1                                                                  | Q13823   | 0.91 | 0.83 | 0.94 | 0.89 | 0.06 | 9  | 17   | 1.39E-45 |
| IPI00015809 | Probable O-sialoglycoprotein endopeptidase                                         | Q9NPF4   | 0.99 | 1.10 | 1.02 | 1.04 | 0.06 | 5  | 14.9 | 3.9E-107 |
| IPI00015836 | Adapter protein containing PH domain, PTB domain and leucine zipper motif 1        | Q9UKG1   | 1.18 | 1.11 | 1.27 | 1.19 | 0.08 | 5  | 9.4  | 4.39E-72 |
| IPI00015838 | Cell growth-regulating nucleolar protein                                           | Q9NX58   | 0.88 | 0.83 | 0.82 | 0.84 | 0.04 | 8  | 15.3 | 3.4E-201 |
| IPI00015842 | Reticulocalbin-1                                                                   | Q15293   | 1.40 | 1.04 | 1.17 | 1.20 | 0.18 | 16 | 62.5 | 6.5E-295 |
| IPI00015856 | Aspartyl aminopeptidase                                                            | Q9ULA0   | 1.09 | 1.09 | 0.92 | 1.03 | 0.09 | 12 | 38.9 | 2.9E-119 |
| IPI00015865 | [Protein ADP-ribosylarginine] hydrolase-like protein 2                             | Q9NX46   | 1.14 | 1.03 | 1.16 | 1.11 | 0.07 | 7  | 23.4 | 1.7E-138 |
| IPI00015866 | ADP-ribosylation factor-like protein 2-binding protein                             | Q9Y2Y0-1 | 1.20 | 1.30 | 1.34 | 1.28 | 0.07 | 2  | 12.9 | 3.79E-14 |
| IPI00015891 | Prefoldin subunit 4                                                                | Q9NQP4   | 1.09 | 0.90 | 0.86 | 0.95 | 0.12 | 5  | 30.6 | 3.2E-120 |
| IPI00015894 | Binder of Rho GTPases 4                                                            | Q9H3Q1   | 1.19 |      |      | 1.19 |      | 1  | 5.3  | 3.91E-59 |
| IPI00015897 | CHORD domain-containing protein 1                                                  | Q9UHD1-1 | 0.68 | 0.85 | 0.84 | 0.79 | 0.09 | 14 | 48.5 | 0        |
| IPI00015905 | Exosome complex exonuclease RRP4                                                   | Q13868   | 1.05 | 1.05 | 0.98 | 1.03 | 0.04 | 5  | 25.6 | 1.47E-52 |
| IPI00015911 | Dihydrolipoamide dehydrogenase                                                     | P09622   | 1.03 | 1.10 | 1.10 | 1.07 | 0.04 | 12 | 25.3 | 3.2E-198 |
| IPI00015916 | Bone-derived growth factor                                                         | Q13876   |      | 0.73 |      | 0.73 |      | 1  | 2.4  | 1.54E-16 |
| IPI00015924 | Septin and tuftelin-interacting protein 1                                          | Q9UBB9-1 |      | 0.96 |      | 0.96 |      | 2  | 2.7  | 0.000199 |
| IPI00015947 | DnaJ homolog subfamily B member 1                                                  | P25685   | 1.11 | 1.16 | 1.09 | 1.12 | 0.04 | 17 | 51.2 | 2.6E-252 |
| IPI00015952 | cDNA FLJ59571, highly similar to Eukaryotic translation initiation factor 4gamma 2 | B4DZF2   | 0.76 | 0.93 | 0.88 | 0.86 | 0.09 | 26 | 32.2 | 2.5E-273 |
| IPI00015953 | DEAD box protein 21                                                                | Q9NR30-1 | 0.67 | 0.72 | 0.64 | 0.68 | 0.04 | 33 | 45.6 | 0        |



|             |                                                           |          |      |      |      |      |      |    |      |          |
|-------------|-----------------------------------------------------------|----------|------|------|------|------|------|----|------|----------|
| IPI00015954 | COPII-associated small GTPase                             | Q9NR31   | 0.90 | 1.06 | 1.12 | 1.03 | 0.11 | 9  | 39.9 | 2.5E-162 |
| IPI00015956 | Exosome complex exonuclease RRP40                         | Q9NQ75   | 1.01 |      |      | 1.01 |      | 2  | 7.6  | 2.03E-15 |
| IPI00015972 | Cytochrome c oxidase polypeptide VIc                      | P09669   | 0.85 | 0.95 | 0.96 | 0.92 | 0.06 | 3  | 32   | 8.88E-05 |
| IPI00015973 | Band 4.1-like protein 2                                   | O43491   | 1.19 | 1.08 | 0.99 | 1.09 | 0.10 | 26 | 33.1 | 0        |
| IPI00015990 | Eyes absent homolog 3                                     | Q99504-1 |      | 1.22 | 0.97 | 1.10 | 0.18 | 1  | 4.5  | 1.46E-09 |
| IPI00016014 | Cerebral protein 14                                       | Q9NQX7-1 | 2.87 |      |      | 2.87 |      | 1  | 7.5  | 6.35E-20 |
| IPI00016046 | Protein MGR2 homolog                                      | P60602-1 | 0.62 |      |      | 0.62 |      | 2  | 24.1 | 4.04E-63 |
| IPI00016074 | M-phase phosphoprotein 6                                  | Q99547   | 1.20 | 1.08 | 0.71 | 1.00 | 0.25 | 4  | 22.5 | 2.48E-18 |
| IPI00016077 | Glioblastoma-amplified sequence                           | O75323   | 1.17 | 1.13 | 0.97 | 1.09 | 0.10 | 5  | 19.9 | 1.08E-24 |
| IPI00016112 | Melanoma-associated antigen MG50                          | Q92626-1 | 0.98 | 1.24 | 1.54 | 1.25 | 0.28 | 6  | 6.9  | 1.05E-68 |
| IPI00016179 | Protein S100-A13                                          | Q99584   | 1.28 | 1.25 | 1.45 | 1.33 | 0.11 | 5  | 48   | 5.11E-36 |
| IPI00016207 | Inner membrane preprotein translocase Tim17a              | Q99595   |      |      | 0.73 | 0.73 |      | 2  | 24.6 | 0.017696 |
| IPI00016249 | Fragile X mental retardation syndrome-related protein 1   | P51114-1 | 0.86 | 1.09 |      | 0.98 | 0.16 | 16 | 33.2 | 4.2E-116 |
| IPI00016250 | Fragile X mental retardation syndrome-related protein 2   | P51116   | 0.85 | 1.23 | 1.05 | 1.04 | 0.19 | 11 | 22.5 | 5.1E-94  |
| IPI00016334 | Cell surface glycoprotein MUC18                           | P43121-1 | 0.42 |      |      | 0.42 |      | 3  | 6.3  | 4.24E-15 |
| IPI00016339 | L1880                                                     | P51148   | 1.05 | 1.09 | 1.11 | 1.08 | 0.03 | 11 | 67.1 | 0        |
| IPI00016342 | Ras-related protein Rab-7a                                | P51149   | 0.93 | 0.95 | 1.00 | 0.96 | 0.03 | 18 | 82.6 | 0        |
| IPI00016346 | Proline synthase co-transcribed bacterial homolog protein | O94903   | 0.97 | 1.18 | 1.22 | 1.12 | 0.13 | 9  | 37.8 | 2.23E-58 |
| IPI00016372 | Ras-related protein Rab-9A                                | P51151   | 1.02 | 1.09 | 1.04 | 1.05 | 0.03 | 6  | 35.8 | 1.4E-103 |
| IPI00016373 | Cell growth-inhibiting gene 4 protein                     | P51153   | 0.85 | 1.13 | 1.14 | 1.04 | 0.16 | 9  | 39.4 | 3.7E-83  |
| IPI00016377 | Ras-related protein Rab-28                                | P51157-1 |      |      | 1.02 | 1.02 |      | 2  | 14   | 0.003069 |
| IPI00016381 | GTP-binding protein Ram                                   | P51159-1 | 0.83 | 1.71 | 1.34 | 1.29 | 0.44 | 4  | 20.4 | 2.09E-06 |
| IPI00016387 | Pre-mRNA cleavage complex 2 protein Pcf11                 | O94913   |      |      | 0.98 | 0.98 |      | 2  | 1.8  | 2.79E-06 |
| IPI00016441 | Pro-rich, PH and SH2 domain-containing signaling mediator | Q9NRF2-1 |      |      | 2.29 | 2.29 |      | 2  | 3.6  | 0.017266 |
| IPI00016457 | Carnitine acetyltransferase                               | P43155-1 |      | 1.36 |      | 1.36 |      | 2  | 3.7  | 1.35E-05 |
| IPI00016481 | Dim1-like protein                                         | Q9NX01   |      | 1.02 |      | 1.02 |      | 2  | 18.8 | 1.9E-09  |
| IPI00016513 | Ras-related protein Rab-10                                | P61026   | 0.93 | 1.07 | 1.05 | 1.02 | 0.07 | 11 | 51.5 | 3.03E-98 |
| IPI00016532 | UPF0609 protein C4orf27                                   | Q9NWY4   | 1.16 | 1.20 | 1.20 | 1.18 | 0.02 | 6  | 22.5 | 8.26E-83 |

|             |                                                                                                     |          |      |      |      |      |      |    |      |          |
|-------------|-----------------------------------------------------------------------------------------------------|----------|------|------|------|------|------|----|------|----------|
| IPI00016542 | WD repeat-containing protein 76                                                                     | Q9H967   |      |      | 1.53 | 1.53 |      | 3  | 6.9  | 1.05E-10 |
| IPI00016559 | Interphase cytoplasmic foci protein 45                                                              | Q9NWX6   | 0.74 | 0.98 |      | 0.86 | 0.17 | 3  | 12.8 | 1.08E-07 |
| IPI00016568 | Adenylate kinase 3-like                                                                             | P27144   | 1.03 | 0.83 | 0.85 | 0.90 | 0.11 | 6  | 41.3 | 1E-52    |
| IPI00016597 | Ceroid-lipofuscinosis neuronal protein 6                                                            | Q9NWW5   |      |      | 0.96 | 0.96 |      | 2  | 10.3 | 1.72E-12 |
| IPI00016605 | UPF0587 protein C1orf123                                                                            | Q9NWW4   | 1.06 | 1.26 | 1.19 | 1.17 | 0.10 | 4  | 39.4 | 2.09E-17 |
| IPI00016608 | Membrane protein p24A                                                                               | Q15363   | 0.93 | 1.17 | 1.20 | 1.10 | 0.15 | 4  | 22.4 | 3.68E-10 |
| IPI00016610 | Alpha-CP1                                                                                           | Q15365   | 1.03 | 1.07 | 1.03 | 1.04 | 0.02 | 15 | 68.3 | 0        |
| IPI00016613 | cDNA, FLJ92904, highly similar to Homo sapiens casein kinase 2, alpha 1 polypeptide (CSNK2A1), mRNA | B2R6D7   | 1.04 | 0.94 | 1.00 | 0.99 | 0.05 | 14 | 45.8 | 0        |
| IPI00016621 | 100 kDa coated vesicle protein C                                                                    | O94973-2 | 1.10 | 1.20 |      | 1.15 | 0.07 | 18 | 24.9 | 4.3E-245 |
| IPI00016634 | Protein C20orf11                                                                                    | Q9NWU2   | 0.77 | 1.17 | 1.08 | 1.01 | 0.21 | 5  | 26.3 | 8.32E-58 |
| IPI00016639 | Atypical protein kinase C-lambda/iota                                                               | P41743   | 0.89 | 0.94 | 1.03 | 0.95 | 0.07 | 4  | 9.2  | 0        |
| IPI00016669 | GTP-binding protein Rheb                                                                            | Q15382   | 0.86 | 1.04 | 1.11 | 1.00 | 0.13 | 9  | 38   | 9.7E-136 |
| IPI00016670 | p27Kip1-releasing factor from RhoA                                                                  | Q6IAA8   | 1.16 | 1.18 | 1.17 | 1.17 | 0.01 | 6  | 44.7 | 1.66E-78 |
| IPI00016676 | Mitochondrial 20 kDa outer membrane protein                                                         | Q15388   | 0.74 | 0.95 |      | 0.84 | 0.15 | 5  | 25.5 | 3.49E-12 |
| IPI00016680 | Transcription factor SOX-30                                                                         | O94993-1 |      | 1.07 |      | 1.07 |      | 2  | 2.7  | 0.016878 |
| IPI00016702 | GAP and centrosome-associated protein                                                               | Q9Y3P9-1 | 1.15 | 1.10 | 1.13 | 1.12 | 0.02 | 12 | 14.4 | 2.42E-74 |
| IPI00016703 | Desmosterol reductase                                                                               | Q15392   | 1.66 |      | 2.45 | 2.05 | 0.56 | 2  | 3.3  | 3.12E-07 |
| IPI00016726 | Uncharacterized protein C14orf119                                                                   | Q9NWQ9   | 0.87 |      | 0.97 | 0.92 | 0.08 | 2  | 17.1 | 2.98E-16 |
| IPI00016745 | Folypoly-gamma-glutamate synthetase                                                                 | Q05932-1 | 0.55 | 1.06 | 0.78 | 0.80 | 0.26 | 2  | 6    | 3.99E-19 |
| IPI00016746 | Core-binding factor subunit beta                                                                    | Q13951-1 | 0.90 |      | 1.15 | 1.03 | 0.18 | 5  | 30.8 | 3E-135   |
| IPI00016801 | Glutamate dehydrogenase 1, mitochondrial                                                            | P00367   | 0.99 | 1.14 | 1.09 | 1.07 | 0.08 | 15 | 32.1 | 1.6E-139 |
| IPI00016807 | NAD-dependent deacetylase sirtuin-5                                                                 | Q9NXA8-1 |      | 1.51 |      | 1.51 |      | 2  | 10.6 | 6.34E-49 |
| IPI00016862 | Glutathione reductase, mitochondrial                                                                | P00390-1 | 0.94 | 1.18 | 1.23 | 1.12 | 0.16 | 7  | 25.1 | 1.73E-38 |
| IPI00016868 | Protein clk-2 homolog                                                                               | Q9Y4R8   | 0.75 | 1.18 | 1.26 | 1.07 | 0.28 | 3  | 4.7  | 9.81E-93 |
| IPI00016891 | Ras-related protein Rab-6B                                                                          | Q9NRW1   | 1.75 |      | 1.17 | 1.46 | 0.41 | 7  | 35.1 | 1.9E-33  |
| IPI00016910 | eIF3 p110                                                                                           | Q99613   | 0.82 | 0.99 | 0.94 | 0.92 | 0.09 | 24 | 24.2 | 0        |
| IPI00016912 | Tetratricopeptide repeat protein 1                                                                  | Q99614   | 1.20 | 0.70 | 0.83 | 0.91 | 0.26 | 9  | 45.9 | 8.1E-113 |
| IPI00016915 | IGFBP-rP1                                                                                           | Q16270   | 0.41 | 1.07 | 1.09 | 0.86 | 0.39 | 4  | 20.9 | 7.7E-23  |
| IPI00016925 | Protein C10                                                                                         | Q99622   | 0.93 | 0.92 | 1.11 | 0.99 | 0.11 | 4  | 50.8 | 7.8E-109 |

|             |                                                              |          |      |      |      |      |      |    |      |          |
|-------------|--------------------------------------------------------------|----------|------|------|------|------|------|----|------|----------|
| IPI00016932 | Inositol polyphosphate phosphatase-like protein 1            | O15357-1 | 1.00 | 1.46 | 1.32 | 1.26 | 0.23 | 2  | 2.5  | 5.15E-36 |
| IPI00017160 | Dopamine-responsive gene 1 protein                           | Q9NP79   | 0.89 | 1.05 | 0.96 | 0.97 | 0.08 | 6  | 28.3 | 4.6E-154 |
| IPI00017184 | EH domain-containing protein 1                               | Q9H4M9   | 1.14 | 1.08 | 1.14 | 1.12 | 0.03 | 26 | 56.9 | 0        |
| IPI00017256 | Ras suppressor protein 1                                     | Q15404   |      | 1.03 |      | 1.03 |      | 10 | 36.8 | 2.4E-76  |
| IPI00017283 | Isoleucine--tRNA ligase                                      | Q9NSE4   | 1.04 | 0.96 | 0.99 | 0.99 | 0.04 | 12 | 14.5 | 4E-52    |
| IPI00017289 | Nucleic acid-binding protein RY-1                            | Q8WVK2   |      | 1.19 | 1.03 | 1.11 | 0.11 | 4  | 24.5 | 1.13E-57 |
| IPI00017292 | Beta-catenin                                                 | P35222-1 | 0.74 | 1.07 | 0.97 | 0.92 | 0.17 | 18 | 28.2 | 1.4E-253 |
| IPI00017303 | DNA mismatch repair protein Msh2                             | P43246   | 1.00 | 1.10 | 1.08 | 1.06 | 0.05 | 30 | 33.1 | 0        |
| IPI00017334 | Prohibitin                                                   | P35232   | 0.88 | 0.87 | 0.91 | 0.88 | 0.02 | 19 | 64   | 0        |
| IPI00017339 | Pre-mRNA-splicing factor SF3b 49 kDa subunit                 | Q15427   | 1.17 | 1.08 | 1.13 | 1.13 | 0.04 | 5  | 21   | 7.2E-123 |
| IPI00017341 | SF3a66                                                       | Q15428   | 1.08 | 0.99 | 0.90 | 0.99 | 0.09 | 7  | 14.1 | 1.05E-42 |
| IPI00017342 | Rho-related GTP-binding protein RhoG                         | P84095   | 1.09 | 1.09 | 1.06 | 1.08 | 0.02 | 12 | 56   | 0        |
| IPI00017344 | Ras-related protein Rab-5B                                   | P61020   | 1.46 | 1.56 | 1.43 | 1.48 | 0.07 | 8  | 47.9 | 6.6E-190 |
| IPI00017367 | Radixin isoform b                                            | A7YIJ8   | 1.06 | 1.11 | 1.13 | 1.10 | 0.03 | 42 | 55.8 | 0        |
| IPI00017373 | Replication factor A protein 3                               | P35244   |      | 1.79 | 1.26 | 1.52 | 0.38 | 2  | 21.5 | 1.78E-13 |
| IPI00017375 | Protein transport protein Sec23A                             | Q15436   | 0.94 | 1.18 | 1.11 | 1.07 | 0.12 | 20 | 34.4 | 0        |
| IPI00017376 | Protein transport protein Sec23B                             | Q15437   |      | 0.98 | 0.76 | 0.87 | 0.16 | 9  | 14.9 | 4.9E-156 |
| IPI00017381 | Activator 1 37 kDa subunit                                   | P35249   | 1.06 | 1.23 | 1.16 | 1.15 | 0.09 | 18 | 56.5 | 7E-202   |
| IPI00017412 | Activator 1 40 kDa subunit                                   | P35250-1 | 1.02 | 1.26 | 1.13 | 1.13 | 0.12 | 11 | 43.8 | 1.5E-158 |
| IPI00017448 | 40S ribosomal protein S21                                    | P63220   | 0.74 | 0.84 | 0.82 | 0.80 | 0.05 | 6  | 68.7 | 2.9E-124 |
| IPI00017450 | General transcription factor IIF 74 kDa subunit              | P35269   | 1.22 | 0.91 | 0.78 | 0.97 | 0.23 | 6  | 15.5 | 3.11E-64 |
| IPI00017451 | SF3a120                                                      | Q15459   | 1.11 | 1.03 | 1.05 | 1.06 | 0.04 | 29 | 38.1 | 0        |
| IPI00017469 | Sepiapterin reductase                                        | P35270   |      | 1.18 | 0.95 | 1.06 | 0.16 | 3  | 18.8 | 1.99E-59 |
| IPI00017504 | Uncharacterized protein C9orf40                              | Q8IXQ3   | 1.38 | 1.26 | 1.06 | 1.23 | 0.16 | 3  | 27.8 | 5.71E-47 |
| IPI00017510 | Cytochrome c oxidase polypeptide II                          | P00403   | 1.05 | 0.91 | 1.00 | 0.99 | 0.07 | 3  | 14.5 | 1.5E-84  |
| IPI00017567 | Endoglin                                                     | P17813-1 | 0.88 | 0.93 | 0.95 | 0.92 | 0.04 | 3  | 7    | 2.7E-21  |
| IPI00017592 | LETM1 and EF-hand domain-containing protein 1, mitochondrial | O95202-1 | 1.05 | 0.95 | 1.00 | 1.00 | 0.05 | 12 | 21.1 | 2.2E-139 |
| IPI00017596 | APC-binding protein EB1                                      | Q15691   | 0.93 | 1.22 | 1.16 | 1.10 | 0.15 | 12 | 49.3 | 4.7E-289 |
| IPI00017598 | GPI ethanolamine phosphate transferase 1                     | O95427   |      |      | 1.14 | 1.14 |      | 1  | 1.7  | 0.011904 |

|             |                                                       |          |      |      |      |      |      |    |      |          |
|-------------|-------------------------------------------------------|----------|------|------|------|------|------|----|------|----------|
| IPI00017617 | DEAD box protein 5                                    | P17844   | 0.78 | 0.87 | 0.90 | 0.85 | 0.06 | 36 | 52.6 | 0        |
| IPI00017669 | BRG1-associated factor 57                             | Q969G3-1 | 0.97 | 0.99 | 1.02 | 1.00 | 0.03 | 9  | 23.8 | 4.23E-69 |
| IPI00017672 | Inosine phosphorylase                                 | P00491   | 0.84 | 0.98 | 0.97 | 0.93 | 0.08 | 12 | 47.4 | 1.9E-139 |
| IPI00017704 | Coactosin-like protein                                | Q14019   | 0.75 | 1.17 | 1.12 | 1.02 | 0.23 | 13 | 59.2 | 6E-130   |
| IPI00017726 | 17-beta-hydroxysteroid dehydrogenase 10               | Q99714-1 | 0.86 | 0.91 | 0.93 | 0.90 | 0.04 | 15 | 73.9 | 0        |
| IPI00017763 | Nucleosome assembly protein 1-like 4                  | A8CGI3   | 1.25 | 1.00 | 1.03 | 1.10 | 0.14 | 13 | 42.7 | 5.4E-262 |
| IPI00017816 | ATP synthase subunit s, mitochondrial                 | Q99766   | 1.03 | 0.97 |      | 1.00 | 0.04 | 5  | 21.9 | 1.16E-12 |
| IPI00017895 | Glycerol-3-phosphate dehydrogenase, mitochondrial     | P43304-1 | 1.00 | 1.02 | 1.13 | 1.05 | 0.07 | 12 | 19.9 | 1.43E-70 |
| IPI00017963 | Small nuclear ribonucleoprotein Sm D2                 | P62316   | 0.96 | 1.05 | 0.98 | 1.00 | 0.05 | 10 | 61.9 | 0        |
| IPI00018009 | Enhancer of mRNA-decapping protein 3                  | Q96F86   |      | 1.11 | 1.03 | 1.07 | 0.06 | 4  | 9.3  | 7.44E-84 |
| IPI00018040 | Mediator complex subunit 22                           | Q15528-1 |      |      | 0.98 | 0.98 |      | 3  | 15   | 6.11E-25 |
| IPI00018098 | Pre-mRNA-splicing factor 38B                          | Q5VTL8-1 | 0.93 | 0.94 | 0.87 | 0.91 | 0.04 | 3  | 5.3  | 1.25E-09 |
| IPI00018120 | 28S ribosomal protein S29, mitochondrial              | P51398   | 0.76 | 0.86 | 0.77 | 0.80 | 0.05 | 7  | 25.4 | 2.8E-125 |
| IPI00018140 | Glycine- and tyrosine-rich RNA-binding protein        | O60506-1 | 1.08 | 0.96 | 1.00 | 1.01 | 0.06 | 29 | 51.5 | 0        |
| IPI00018146 | 14-3-3 protein tau                                    | P27348   | 0.96 | 1.10 | 1.11 | 1.06 | 0.08 | 27 | 81.6 | 0        |
| IPI00018188 | Adaptin ear-binding coat-associated protein 2         | Q9NVZ3-1 | 1.04 | 1.16 | 1.16 | 1.12 | 0.07 | 4  | 29.7 | 3.16E-82 |
| IPI00018192 | NOP seven-associated protein 1                        | Q6RFH5-1 | 0.79 | 0.91 | 0.74 | 0.81 | 0.09 | 4  | 13.5 | 4.18E-65 |
| IPI00018195 | Mitogen-activated protein kinase 3                    | P27361   |      | 1.30 | 1.51 | 1.40 | 0.15 | 7  | 23.5 | 8.55E-67 |
| IPI00018196 | Notchless protein homolog 1                           | Q9NVX2   | 0.76 |      | 0.94 | 0.85 | 0.12 | 6  | 15.7 | 1.05E-44 |
| IPI00018198 | Centrosomal protein of 27 kDa                         | Q9NVX0-1 | 0.76 | 0.97 |      | 0.86 | 0.15 | 2  | 9.4  | 1.68E-13 |
| IPI00018206 | Aspartate aminotransferase, mitochondrial             | P00505   | 0.86 | 1.02 | 1.01 | 0.96 | 0.09 | 15 | 35.6 | 2.6E-228 |
| IPI00018214 | Class D basic helix-loop-helix protein 4              | P61244-1 | 1.00 |      | 0.84 | 0.92 | 0.11 | 3  | 25   | 4.59E-87 |
| IPI00018219 | Kerato-epithelin                                      | Q15582   | 0.42 | 0.39 | 0.73 | 0.51 | 0.18 | 4  | 10.5 | 2.56E-14 |
| IPI00018235 | PEF protein with a long N-terminal hydrophobic domain | Q9UBV8   | 0.95 | 1.23 | 1.03 | 1.07 | 0.14 | 3  | 12   | 8.86E-57 |
| IPI00018236 | Cerebroside sulfate activator protein                 | P17900   | 0.93 | 1.05 |      | 0.99 | 0.09 | 2  | 8.8  | 0.008666 |
| IPI00018240 | Nucleolar protein 130                                 | Q9NVU7-1 | 0.74 | 0.60 | 1.01 | 0.78 | 0.20 | 3  | 5.8  | 1.72E-28 |
| IPI00018260 | Armadillo repeat-containing protein 1                 | Q9NVT9   | 0.84 | 1.11 |      | 0.97 | 0.19 | 2  | 13.1 | 2.84E-10 |
| IPI00018272 | Pyridoxamine-phosphate oxidase                        | Q9NVS9   |      | 1.08 | 0.92 | 1.00 | 0.11 | 3  | 18.4 | 1.09E-17 |
| IPI00018274 | Epidermal growth factor receptor                      | P00533-1 | 1.19 | 1.02 | 1.30 | 1.17 | 0.14 | 7  | 10.4 | 1.43E-70 |

|             |                                                                          |          |      |      |      |      |      |    |      |          |
|-------------|--------------------------------------------------------------------------|----------|------|------|------|------|------|----|------|----------|
| IPI00018288 | DNA-directed RNA polymerase II 33 kDa polypeptide                        | P19387   | 0.96 | 0.99 |      | 0.98 | 0.02 | 7  | 36.4 | 2.85E-85 |
| IPI00018311 | Neuroplastin                                                             | Q9Y639-2 | 1.60 | 1.14 | 1.38 | 1.37 | 0.23 | 2  | 7.5  | 0.000179 |
| IPI00018331 | SNARE-associated protein Snapin                                          | O95295   | 0.96 |      | 1.19 | 1.07 | 0.16 | 3  | 26.5 | 6.5E-108 |
| IPI00018349 | CDC21 homolog                                                            | P33991   | 1.12 | 1.21 | 1.18 | 1.17 | 0.04 | 33 | 43.2 | 0        |
| IPI00018350 | CDC46 homolog                                                            | P33992   | 1.14 | 1.20 | 1.18 | 1.17 | 0.03 | 32 | 47   | 8.3E-153 |
| IPI00018352 | Neuron cytoplasmic protein 9.5                                           | P09936   | 1.01 | 1.22 | 1.24 | 1.15 | 0.12 | 14 | 65   | 0        |
| IPI00018364 | Ras-related protein Rap-2b                                               | P61225   | 1.28 |      | 1.35 | 1.31 | 0.04 | 6  | 37.2 | 2.4E-119 |
| IPI00018398 | 26S protease regulatory subunit 6A                                       | P17980   | 1.01 | 1.00 | 1.05 | 1.02 | 0.03 | 22 | 54.2 | 0        |
| IPI00018404 | Elongin 110 kDa subunit                                                  | Q14241   |      | 1.54 |      | 1.54 |      | 2  | 4.1  | 1.35E-34 |
| IPI00018434 | ESCRT-I complex subunit TSG101                                           | Q99816-1 | 1.30 | 1.17 | 1.08 | 1.18 | 0.11 | 5  | 17.2 | 5.47E-51 |
| IPI00018465 | CCT-eta                                                                  | Q99832   | 0.82 | 0.95 | 0.93 | 0.90 | 0.07 | 28 | 60.4 | 0        |
| IPI00018522 | Interferon receptor 1-bound protein 4                                    | Q99873-1 | 0.91 | 1.00 | 0.91 | 0.94 | 0.06 | 16 | 40.4 | 2.1E-280 |
| IPI00018627 | N-acetyltransferase 13                                                   | Q9GZZ1-1 | 0.88 | 0.96 | 0.89 | 0.91 | 0.04 | 14 | 55   | 4.4E-199 |
| IPI00018689 | Centromere protein Q                                                     | Q7L2Z9   |      |      | 1.34 | 1.34 |      | 1  | 5.2  | 0.000146 |
| IPI00018768 | Translin                                                                 | Q15631   | 0.93 | 1.05 | 1.04 | 1.01 | 0.07 | 13 | 52.6 | 2E-233   |
| IPI00018783 | Inosine triphosphate pyrophosphatase                                     | Q9BY32   | 0.81 | 1.03 | 1.07 | 0.97 | 0.13 | 4  | 24.2 | 2.92E-85 |
| IPI00018798 | DnaJ homolog subfamily C member 17                                       | Q9NVM6   | 1.09 | 1.19 | 0.99 | 1.09 | 0.10 | 5  | 22.4 | 1.1E-200 |
| IPI00018801 | Eva-1 homolog B                                                          | Q9NVM1   | 2.21 | 1.67 | 1.48 | 1.79 | 0.38 | 3  | 46.1 | 1.6E-130 |
| IPI00018813 | Alien homolog                                                            | P61201-2 | 0.98 | 1.06 | 1.11 | 1.05 | 0.07 | 14 | 42.7 | 9.7E-228 |
| IPI00018871 | cDNA FLJ56285, highly similar to ADP-ribosylation factor-like protein 8B | B4E1J8   | 1.04 | 1.27 | 1.29 | 1.20 | 0.13 | 6  | 22.3 | 3.45E-35 |
| IPI00018873 | Nicotinamide phosphoribosyltransferase                                   | P43490   | 1.01 | 1.17 | 1.20 | 1.13 | 0.10 | 12 | 36   | 0        |
| IPI00018914 | Protein-tyrosine phosphatase pez                                         | Q15678   |      | 1.18 | 1.10 | 1.14 | 0.06 | 3  | 3.9  | 5.13E-08 |
| IPI00018931 | Maternal-embryonic 3                                                     | Q96QK1   | 1.11 | 1.20 | 1.20 | 1.17 | 0.05 | 15 | 22.4 | 0        |
| IPI00018946 | cDNA FLJ56439, highly similar to Pantothenate kinase 4 (EC 2.7.1.33)     | B4DHW9   | 1.60 | 1.10 | 1.00 | 1.23 | 0.32 | 4  | 10.1 | 5.12E-49 |
| IPI00018963 | Actopaxin                                                                | Q9NVD7-1 | 0.92 | 1.05 | 1.22 | 1.06 | 0.15 | 12 | 30.4 | 7.6E-293 |
| IPI00018971 | 52 kDa ribonucleoprotein autoantigen Ro/SS-A                             | P19474   | 1.06 | 1.26 | 1.33 | 1.21 | 0.14 | 6  | 16.8 | 4.75E-25 |
| IPI00019004 | Translocation protein 1                                                  | Q99442   | 0.59 | 0.81 | 0.74 | 0.72 | 0.11 | 3  | 7.3  | 8.56E-08 |
| IPI00019046 | Pre-mRNA-splicing factor RBM22                                           | Q9NW64-1 | 0.91 | 1.25 | 0.99 | 1.05 | 0.18 | 4  | 12.1 | 7.08E-32 |

|             |                                                                        |          |      |      |      |      |      |     |      |          |
|-------------|------------------------------------------------------------------------|----------|------|------|------|------|------|-----|------|----------|
| IPI00019141 | 1-acylglycerol-3-phosphate O-acyltransferase 1                         | Q99943   | 1.34 | 0.95 | 1.22 | 1.17 | 0.20 | 2   | 10.6 | 1.63E-21 |
| IPI00019148 | B-cell signal transduction molecule alpha 4                            | P78318   | 1.12 | 0.94 | 0.95 | 1.00 | 0.10 | 7   | 21.8 | 6.12E-85 |
| IPI00019157 | Chondroitin sulfate proteoglycan 4                                     | Q6UVK1   |      |      | 0.88 | 0.88 |      | 4   | 2.8  | 1.1E-41  |
| IPI00019169 | cDNA, FLJ96508, Homo sapiens SH3-domain GRB2-like 1 (SH3GL1), mRNA     | Q6FGM0   | 1.11 | 1.13 | 1.02 | 1.09 | 0.06 | 12  | 32.6 | 9.9E-115 |
| IPI00019178 | L-3-phosphoserine phosphatase                                          | P78330   | 0.77 | 0.98 | 0.90 | 0.88 | 0.11 | 5   | 24.9 | 3.08E-29 |
| IPI00019226 | Bromodomain-containing protein 8                                       | Q9H0E9-1 |      | 1.28 |      | 1.28 |      | 2   | 3.2  | 2.72E-16 |
| IPI00019269 | Meiotic recombination REC14 protein homolog                            | Q9GZS3   | 0.75 | 1.27 | 1.07 | 1.03 | 0.26 | 5   | 26.2 | 1.58E-39 |
| IPI00019276 | UBX domain-containing protein 1                                        | Q9BZV1-1 | 1.02 | 1.46 | 1.27 | 1.25 | 0.22 | 4   | 20   | 2.92E-61 |
| IPI00019326 | Adrenal ferredoxin                                                     | P10109   | 0.89 | 0.85 | 0.82 | 0.85 | 0.04 | 2   | 9.8  | 6.72E-06 |
| IPI00019329 | 8 kDa dynein light chain                                               | P63167   | 0.81 |      | 0.97 | 0.89 | 0.11 | 4   | 51.7 | 6.1E-128 |
| IPI00019345 | C21KG                                                                  | P62834   | 1.03 | 1.02 |      | 1.02 | 0.00 | 10  | 44   | 5.47E-96 |
| IPI00019353 | Acylglycerol kinase, mitochondrial                                     | Q53H12-1 | 1.62 | 0.83 | 1.22 | 1.22 | 0.39 | 2   | 11.1 | 3.48E-24 |
| IPI00019355 | Cerebral protein 2                                                     | Q15714-2 | 2.31 |      |      | 2.31 |      | 2   | 19.4 | 3.25E-70 |
| IPI00019376 | Septin-11                                                              | Q9NVA2-2 | 0.97 | 1.11 | 1.18 | 1.09 | 0.11 | 18  | 41.9 | 0        |
| IPI00019380 | 80 kDa nuclear cap-binding protein                                     | Q09161   | 0.96 | 1.01 | 1.01 | 0.99 | 0.03 | 14  | 22.2 | 5.1E-120 |
| IPI00019383 | cDNA FLJ56840, highly similar to Galactokinase (EC 2.7.1.6)            | B4E1G6   | 1.19 | 1.23 | 1.13 | 1.18 | 0.05 | 12  | 28.9 | 1.22E-81 |
| IPI00019385 | Signal sequence receptor subunit delta                                 | P51571   | 0.94 | 1.04 | 1.01 | 1.00 | 0.05 | 5   | 29.9 | 1.5E-196 |
| IPI00019400 | Thiopurine methyltransferase                                           | P51580   |      | 1.23 | 1.27 | 1.25 | 0.03 | 4   | 14.7 | 0.001289 |
| IPI00019407 | NAD(P)H steroid dehydrogenase                                          | Q15738   | 1.36 | 1.47 | 1.53 | 1.45 | 0.09 | 10  | 34.9 | 2.1E-120 |
| IPI00019432 | EGR-1-binding protein 2                                                | Q15742-1 |      | 0.92 | 1.03 | 0.97 | 0.07 | 2   | 8.8  | 5.57E-25 |
| IPI00019450 | 60 kDa SS-A/Ro ribonucleoprotein                                       | P10155-1 | 0.95 | 1.17 | 1.16 | 1.09 | 0.13 | 7   | 14.9 | 1.05E-59 |
| IPI00019451 | MRG-binding protein                                                    | Q9NV56   | 1.47 | 1.31 | 1.20 | 1.33 | 0.13 | 3   | 15.7 | 1.71E-74 |
| IPI00019459 | Mitogen-activated protein kinase kinase kinase 7-interacting protein 1 | Q15750   | 1.11 | 1.19 | 1.10 | 1.13 | 0.05 | 7   | 21   | 7.7E-189 |
| IPI00019463 | Eukaryotic translation initiation factor 2-alpha kinase 2              | P19525   | 0.93 | 1.15 | 1.15 | 1.08 | 0.13 | 17  | 32.5 | 9.9E-248 |
| IPI00019472 | Baboon M7 virus receptor                                               | Q15758   | 0.81 | 0.72 | 0.78 | 0.77 | 0.05 | 7   | 14.8 | 5.3E-218 |
| IPI00019488 | BRMS2                                                                  | Q9NV31   | 0.99 | 0.77 | 1.01 | 0.93 | 0.13 | 8   | 38   | 1.22E-82 |
| IPI00019495 | Dynein light chain Tctex-type 1                                        | P63172   | 0.82 |      |      | 0.82 |      | 1   | 14.2 | 4.75E-92 |
| IPI00019502 | Cellular myosin heavy chain, type A                                    | P35579-1 | 0.89 | 0.88 | 0.99 | 0.92 | 0.06 | 205 | 73.7 | 0        |

|             |                                                                           |          |      |      |      |      |      |    |      |          |
|-------------|---------------------------------------------------------------------------|----------|------|------|------|------|------|----|------|----------|
| IPI00019548 | JV18-1                                                                    | Q15796-1 |      |      | 1.30 | 1.30 |      | 3  | 8.1  | 6.05E-32 |
| IPI00019551 | Beckwith-Wiedemann syndrome chromosomal region 1 candidate gene C protein | Q53GA4   |      |      | 1.67 | 1.67 |      | 3  | 34.2 | 5.94E-08 |
| IPI00019560 | Uncharacterized protein C6orf64                                           | Q9NPB0-1 | 1.18 |      |      | 1.18 |      | 1  | 15.3 | 2.33E-16 |
| IPI00019600 | DDVit 1                                                                   | Q15819   | 1.20 | 1.05 | 1.06 | 1.10 | 0.08 | 10 | 54.5 | 7.3E-221 |
| IPI00019640 | Serine/threonine-protein kinase VRK1                                      | Q99986   | 0.74 | 1.08 | 0.98 | 0.93 | 0.17 | 4  | 11.6 | 2.81E-38 |
| IPI00019642 | CAP-Gly domain-containing linker protein 2                                | Q9UDT6-1 | 1.32 | 1.33 | 0.86 | 1.17 | 0.27 | 5  | 6.6  | 1.16E-31 |
| IPI00019733 | mRNA export factor                                                        | P78406   | 0.90 | 1.10 | 0.98 | 1.00 | 0.10 | 9  | 28.8 | 8.31E-76 |
| IPI00019755 | Glutathione S-transferase omega-1                                         | P78417   | 0.87 | 1.22 | 1.13 | 1.07 | 0.18 | 8  | 29.9 | 1.06E-50 |
| IPI00019770 | 40S ribosomal protein S30                                                 | P62861   | 0.89 | 0.85 | 0.78 | 0.84 | 0.06 | 3  | 21.8 | 5.06E-07 |
| IPI00019812 | Protein phosphatase T                                                     | P53041   | 0.96 | 1.20 | 1.25 | 1.13 | 0.16 | 9  | 21   | 2.4E-183 |
| IPI00019835 | Bcl-2-like protein 12                                                     | Q9HB09-1 | 0.64 | 0.84 |      | 0.74 | 0.14 | 3  | 9.6  | 1.68E-10 |
| IPI00019848 | C1 factor                                                                 | P51610-1 | 1.26 | 1.12 | 1.12 | 1.17 | 0.08 | 21 | 16.8 | 5.2E-170 |
| IPI00019903 | Coiled-coil domain-containing protein 44                                  | Q9BSH4   | 0.97 | 0.89 | 0.85 | 0.90 | 0.06 | 4  | 20.5 | 7E-34    |
| IPI00019912 | 17-beta-hydroxysteroid dehydrogenase 4                                    | P51659   | 1.02 | 1.16 | 1.15 | 1.11 | 0.07 | 25 | 40.8 | 4.6E-240 |
| IPI00019918 | ATP-dependent RNA helicase DDX19A                                         | Q9NUU7   | 1.03 | 1.26 | 1.09 | 1.13 | 0.12 | 10 | 23.6 | 9E-126   |
| IPI00019924 | Tubulin-folding cofactor C                                                | Q15814   | 1.07 | 1.29 | 1.54 | 1.30 | 0.23 | 4  | 14.7 | 1.19E-84 |
| IPI00019927 | 26S proteasome non-ATPase regulatory subunit 7                            | P51665   | 1.09 | 1.11 | 1.03 | 1.08 | 0.04 | 10 | 30.6 | 2.6E-183 |
| IPI00019962 | UPF0534 protein C4orf43                                                   | Q96EY4   | 0.79 | 0.87 | 0.84 | 0.83 | 0.04 | 4  | 23.2 | 8.1E-162 |
| IPI00019971 | cDNA FLJ54775, highly similar to Syntaxin-binding protein 2               | B4E175   |      | 1.16 | 0.86 | 1.01 | 0.21 | 3  | 7.5  | 1.17E-08 |
| IPI00019977 | General transcription factor IIE 56 kDa subunit                           | P29083   | 0.94 | 1.05 | 1.08 | 1.03 | 0.07 | 3  | 10.7 | 1.99E-24 |
| IPI00019981 | General transcription factor IIE subunit 2                                | P29084   | 0.89 | 0.91 | 1.24 | 1.01 | 0.20 | 3  | 13.4 | 7.67E-64 |
| IPI00019983 | Apoptosis regulator Bcl-X                                                 | Q07817-1 | 1.04 | 1.49 | 1.25 | 1.26 | 0.23 | 3  | 14.2 | 7.18E-18 |
| IPI00019994 | Gamma-taxilin                                                             | Q9NUQ3   | 0.96 | 0.98 | 0.87 | 0.94 | 0.06 | 6  | 13.8 | 3.93E-11 |
| IPI00019997 | Mammalian lin-seven protein 3                                             | Q9NUP9   | 0.95 | 1.05 | 1.00 | 1.00 | 0.05 | 5  | 26.4 | 7.21E-13 |
| IPI00020004 | Protein MAC30                                                             | Q5BJF2   | 1.16 |      |      | 1.16 |      | 2  | 10.2 | 0.010063 |
| IPI00020008 | NEDD8                                                                     | Q15843   | 1.08 | 1.05 | 1.06 | 1.06 | 0.02 | 4  | 49.4 | 4.14E-48 |
| IPI00020021 | Protein DEK                                                               | P35659   | 1.27 | 1.24 | 1.27 | 1.26 | 0.02 | 16 | 36.8 | 5.6E-136 |
| IPI00020042 | 26S protease regulatory subunit 6B                                        | P43686-1 | 0.97 | 1.03 | 1.04 | 1.01 | 0.04 | 29 | 67.5 | 0        |
| IPI00020050 | Mitochondrial DEAD box protein 28                                         | Q9NUL7   |      |      | 1.05 | 1.05 |      | 2  | 5.2  | 0.000219 |

|             |                                                                                                     |          |      |      |      |      |      |    |      |          |
|-------------|-----------------------------------------------------------------------------------------------------|----------|------|------|------|------|------|----|------|----------|
| IPI00020075 | Abhydrolase domain-containing protein 10, mitochondrial                                             | Q9NUJ1   | 0.93 | 1.04 | 1.08 | 1.02 | 0.08 | 6  | 23.2 | 5.3E-263 |
| IPI00020101 | Histone H2B type 1-C/E/F/G/I                                                                        | P62807   | 1.22 |      |      | 1.22 |      | 16 | 77.8 | 3.8E-191 |
| IPI00020127 | Replication factor A protein 1                                                                      | P27694   | 1.13 | 1.31 | 1.33 | 1.26 | 0.11 | 20 | 42.7 | 0        |
| IPI00020128 | Hepatocellular carcinoma-associated antigen 66                                                      | Q9NYH9   | 0.82 | 0.88 | 0.90 | 0.87 | 0.04 | 7  | 15.1 | 4.3E-152 |
| IPI00020164 | Protein tyrosine phosphatase type IVA 1                                                             | Q93096   | 0.74 | 0.94 |      | 0.84 | 0.15 | 6  | 36.4 | 2.5E-104 |
| IPI00020178 | Signal transducing adapter molecule 1                                                               | Q92783-1 |      | 1.15 |      | 1.15 |      | 3  | 7    | 1.78E-17 |
| IPI00020191 | HU-PP-1                                                                                             | Q12974-1 | 0.88 | 1.34 | 1.09 | 1.10 | 0.23 | 5  | 30.5 | 2.52E-74 |
| IPI00020196 | Armadillo repeat-containing protein 6                                                               | Q6NXE6   | 0.76 | 1.13 | 0.95 | 0.95 | 0.18 | 6  | 16.4 | 4.8E-160 |
| IPI00020226 | Branched-chain acyl-CoA oxidase                                                                     | O15254-1 |      | 0.65 | 1.12 | 0.89 | 0.33 | 2  | 4.1  | 2.68E-27 |
| IPI00020356 | MAP1 light chain LC2                                                                                | P78559   |      | 0.92 | 1.28 | 1.10 | 0.25 | 3  | 1.1  | 9.38E-07 |
| IPI00020418 | p23                                                                                                 | P10301   | 1.23 | 1.20 | 1.19 | 1.21 | 0.02 | 11 | 50.5 | 8.1E-147 |
| IPI00020436 | GTP-binding protein YPT3                                                                            | Q15907   | 1.12 | 1.12 | 1.17 | 1.14 | 0.03 | 12 | 57.8 | 3E-169   |
| IPI00020451 | Imprinted and ancient gene protein homolog                                                          | Q9P2X3-1 |      | 1.30 |      | 1.30 |      | 2  | 6.6  | 0.001343 |
| IPI00020454 | Deoxycytidine kinase                                                                                | P27707   | 0.93 | 1.27 | 1.20 | 1.13 | 0.18 | 10 | 35.4 | 8.12E-85 |
| IPI00020472 | Transmembrane protein 111                                                                           | Q9P0I2-1 | 1.00 | 1.04 | 1.03 | 1.02 | 0.02 | 5  | 24.5 | 1.3E-141 |
| IPI00020508 | N(2),N(2)-dimethylguanosine tRNA methyltransferase                                                  | Q9NXH9-1 | 0.71 | 0.87 | 0.78 | 0.78 | 0.08 | 13 | 27.9 | 3.91E-80 |
| IPI00020515 | p31                                                                                                 | Q9NZ43-1 |      | 1.06 | 1.13 | 1.10 | 0.05 | 2  | 11.2 | 2.47E-06 |
| IPI00020530 | Acyl-coenzyme A thioesterase 13                                                                     | Q9NPJ3   |      | 1.23 | 1.17 | 1.20 | 0.05 | 2  | 15.7 | 2.61E-39 |
| IPI00020540 | Transmembrane protein 126B                                                                          | Q8IUX1-1 | 0.89 | 0.85 | 0.74 | 0.83 | 0.08 | 1  | 6.1  | 3.58E-05 |
| IPI00020557 | Alpha-2-macroglobulin receptor                                                                      | Q07954   | 1.53 | 1.11 | 0.99 | 1.21 | 0.29 | 6  | 1.7  | 9.37E-56 |
| IPI00020567 | CDC42 GTPase-activating protein                                                                     | Q07960   | 1.13 | 1.05 | 1.26 | 1.15 | 0.11 | 9  | 28.2 | 7.7E-105 |
| IPI00020578 | cDNA FLJ53211, highly similar to A-Raf proto-oncogene serine/threonine-protein kinase (EC 2.7.11.1) | B4DV85   |      | 1.09 |      | 1.09 |      | 2  | 3.6  | 2E-06    |
| IPI00020599 | Calregulin                                                                                          | P27797   | 1.15 | 0.96 | 1.05 | 1.05 | 0.10 | 31 | 75.5 | 0        |
| IPI00020602 | Casein kinase II subunit alpha                                                                      | P19784   | 1.07 | 1.16 | 1.00 | 1.08 | 0.08 | 8  | 30.9 | 1E-166   |
| IPI00020672 | Dipeptidyl aminopeptidase III                                                                       | Q9NY33-1 | 1.16 | 1.15 | 1.18 | 1.16 | 0.02 | 21 | 38.5 | 4.3E-291 |
| IPI00020701 | ERI1 exoribonuclease 3                                                                              | O43414-1 |      | 1.18 | 1.04 | 1.11 | 0.10 | 2  | 6.2  | 9.82E-05 |
| IPI00020719 | CARD adapter inducing interferon beta                                                               | Q7Z434-1 | 1.49 |      | 1.18 | 1.33 | 0.22 | 7  | 28.5 | 3.84E-64 |
| IPI00020887 | Synaptobrevin-like protein 1                                                                        | P51809-1 |      | 1.32 |      | 1.32 |      | 2  | 7.7  | 8.33E-06 |



|             |                                                                               |          |      |      |      |      |      |    |      |          |
|-------------|-------------------------------------------------------------------------------|----------|------|------|------|------|------|----|------|----------|
| IPI00020898 | 90 kDa ribosomal protein S6 kinase 3                                          | P51812   | 1.18 | 1.19 | 1.27 | 1.21 | 0.05 | 6  | 11.4 | 2.01E-21 |
| IPI00020928 | Mitochondrial transcription factor 1                                          | Q00059   | 1.08 | 0.93 | 0.94 | 0.98 | 0.08 | 10 | 39.4 | 1.8E-54  |
| IPI00020944 | Squalene synthase                                                             | P37268   | 3.42 | 4.45 | 4.69 | 4.19 | 0.67 | 11 | 28.3 | 1.6E-169 |
| IPI00020956 | Hepatoma-derived growth factor                                                | P51858   | 1.50 | 1.13 | 1.14 | 1.26 | 0.21 | 22 | 75.8 | 0        |
| IPI00020965 | UbcH2                                                                         | P62256   | 0.88 |      | 1.03 | 0.95 | 0.10 | 4  | 21.3 | 1.16E-90 |
| IPI00020984 | cDNA FLJ55574, highly similar to Calnexin                                     | B4DGP8   | 1.17 | 0.87 | 1.00 | 1.01 | 0.15 | 26 | 42.4 | 0        |
| IPI00020985 | E1A-associated protein p300                                                   | Q09472   |      | 1.28 | 0.98 | 1.13 | 0.21 | 3  | 2.3  | 2.22E-10 |
| IPI00020991 | CDKN2A-interacting protein                                                    | Q9NXV6   | 1.13 | 1.05 | 1.20 | 1.13 | 0.08 | 8  | 21.7 | 5E-137   |
| IPI00021033 | Collagen alpha-1(III) chain                                                   | P02461-1 | 2.59 | 1.60 | 2.24 | 2.14 | 0.50 | 9  | 8.5  | 1.5E-33  |
| IPI00021048 | Fer-1-like protein 3                                                          | Q9NZM1-1 | 0.95 | 1.05 | 1.07 | 1.02 | 0.06 | 29 | 20.7 | 1.3E-285 |
| IPI00021106 | Endonuclease G-like 1                                                         | Q9Y2C4-1 | 0.97 | 0.69 | 0.90 | 0.86 | 0.15 | 3  | 10.6 | 5.3E-18  |
| IPI00021129 | Adapter-related protein complex 3 subunit beta-1                              | O00203-1 | 1.14 | 1.20 | 1.06 | 1.13 | 0.07 | 12 | 13.7 | 4.38E-81 |
| IPI00021147 | Cell migration-inducing gene 15 protein                                       | O15121   |      | 1.00 | 1.07 | 1.03 | 0.05 | 1  | 5.6  | 1.37E-31 |
| IPI00021167 | Interferon-inducible double stranded RNA-dependent protein kinase activator A | O75569-1 | 1.02 | 1.21 | 1.14 | 1.13 | 0.10 | 5  | 22   | 4.08E-57 |
| IPI00021175 | Cdc2-related kinase, arginine/serine-rich                                     | Q9NYV4-1 | 1.60 | 0.87 |      | 1.24 | 0.52 | 3  | 2.6  | 4.61E-07 |
| IPI00021187 | 49 kDa TATA box-binding protein-interacting protein                           | Q9Y265-1 | 0.89 | 0.93 | 0.91 | 0.91 | 0.02 | 19 | 51.5 | 1.4E-304 |
| IPI00021248 | Polo-like kinase 1                                                            | P53350   | 0.78 | 0.93 | 0.95 | 0.89 | 0.10 | 8  | 18.6 | 8.9E-242 |
| IPI00021258 | ADP-ribosylation factor-interacting protein 1                                 | P53367-1 | 1.11 |      | 1.01 | 1.06 | 0.07 | 5  | 22.3 | 9.8E-68  |
| IPI00021263 | 14-3-3 protein zeta/delta                                                     | P63104   | 1.05 | 1.08 | 1.12 | 1.08 | 0.04 | 30 | 81.6 | 0        |
| IPI00021264 | Basic calponin                                                                | P51911   | 1.01 | 1.34 |      | 1.17 | 0.23 | 3  | 14.5 | 1.25E-41 |
| IPI00021266 | 60S ribosomal protein L23a                                                    | P62750   | 0.96 | 0.90 | 0.92 | 0.93 | 0.03 | 12 | 44.2 | 2.77E-89 |
| IPI00021267 | Ephrin type-A receptor 2                                                      | P29317   | 0.67 | 1.01 | 0.78 | 0.82 | 0.17 | 11 | 13.9 | 8.17E-72 |
| IPI00021277 | Cytosolic Fe-S cluster assembly factor NUBP1                                  | P53384-1 | 0.93 | 1.22 | 1.02 | 1.06 | 0.15 | 5  | 23.8 | 1.33E-68 |
| IPI00021290 | ATP-citrate (pro-S)-lyase                                                     | P53396   |      | 1.26 | 1.23 | 1.24 | 0.02 | 42 | 42.9 | 0        |
| IPI00021305 | Cyclin-H                                                                      | P51946   | 0.77 |      |      | 0.77 |      | 4  | 16.1 | 2.92E-40 |
| IPI00021320 | 7SK snRNA methylphosphate capping enzyme                                      | Q7L2J0   |      |      | 1.28 | 1.28 |      | 3  | 7.4  | 0.000452 |
| IPI00021326 | SHC-transforming protein 1                                                    | B5BU19   | 1.15 | 0.83 | 1.04 | 1.01 | 0.17 | 2  | 9.2  | 2.19E-21 |
| IPI00021327 | Adapter protein GRB2                                                          | P62993-1 | 0.87 | 1.00 | 1.06 | 0.98 | 0.10 | 9  | 40.1 | 3.2E-46  |

|             |                                                               |          |      |      |      |      |      |     |      |          |
|-------------|---------------------------------------------------------------|----------|------|------|------|------|------|-----|------|----------|
| IPI00021329 | WD repeat domain phosphoinositide-interacting protein 3       | Q5MNZ6   |      |      | 1.09 | 1.09 |      | 1   | 4.1  | 0.000925 |
| IPI00021338 | 70 kDa mitochondrial autoantigen of primary biliary cirrhosis | P10515   | 1.02 | 0.95 | 1.07 | 1.01 | 0.06 | 12  | 25.7 | 1.2E-209 |
| IPI00021346 | UbcH6                                                         | P51965   | 1.07 | 1.23 | 0.93 | 1.08 | 0.15 | 4   | 31.1 | 3.43E-17 |
| IPI00021347 | L-UBC                                                         | P68036   |      | 1.04 | 0.98 | 1.01 | 0.04 | 13  | 81.8 | 2E-102   |
| IPI00021370 | Huntingtin-interacting protein 2                              | P61086-1 | 1.08 | 0.96 | 1.03 | 1.02 | 0.06 | 9   | 44   | 1.5E-151 |
| IPI00021389 | Copper chaperone for superoxide dismutase                     | O14618   | 1.06 | 1.14 | 1.00 | 1.07 | 0.07 | 5   | 25.5 | 3.07E-62 |
| IPI00021405 | 70 kDa lamin                                                  | P02545-1 | 1.33 | 1.19 | 1.28 | 1.27 | 0.07 | 64  | 78.9 | 0        |
| IPI00021408 | Diadenosine 5,5'-P1,P6-hexaphosphate hydrolase 2              | Q9NZJ9-2 |      | 1.05 | 1.00 | 1.03 | 0.03 | 5   | 20.4 | 2.4E-23  |
| IPI00021417 | SNU66 homolog                                                 | O43290   | 1.02 | 0.97 | 1.03 | 1.01 | 0.03 | 19  | 31   | 0        |
| IPI00021435 | 26S protease regulatory subunit 7                             | P35998   | 1.02 | 1.06 | 1.12 | 1.07 | 0.05 | 24  | 51.3 | 1E-275   |
| IPI00021453 | Lipid phosphate phosphohydrolase 3                            | O14495   | 0.92 |      | 1.19 | 1.05 | 0.19 | 1   | 4.2  | 0.001333 |
| IPI00021458 | EH domain-containing protein 3                                | Q9NZN3   | 1.03 | 1.29 |      | 1.16 | 0.18 | 12  | 28   | 1.56E-62 |
| IPI00021475 | Ras-related protein Rab-33B                                   | Q9H082   |      |      | 1.05 | 1.05 |      | 2   | 10   | 5.11E-17 |
| IPI00021537 | Opioid growth factor receptor                                 | Q9NZT2-1 | 1.00 | 1.11 | 1.04 | 1.05 | 0.05 | 6   | 12.4 | 4.2E-156 |
| IPI00021570 | Endothelial differentiation-related factor 1                  | O60869-1 | 1.12 | 1.21 | 1.11 | 1.14 | 0.06 | 6   | 43.2 | 4.08E-38 |
| IPI00021626 | RNA-binding motif protein 42                                  | Q9BTD8-1 | 1.02 | 1.13 | 1.05 | 1.07 | 0.05 | 5   | 12.7 | 4.03E-53 |
| IPI00021634 | Kinesin light chain 2                                         | Q9H0B6   | 0.92 | 1.08 | 1.00 | 1.00 | 0.08 | 14  | 25.7 | 6.92E-67 |
| IPI00021685 | ADP-ribosylation factor-like protein 6                        | Q9H0F7   |      | 0.47 |      | 0.47 |      | 2   | 11.8 | 0.000468 |
| IPI00021695 | Plasma membrane calcium ATPase isoform 1                      | P20020-1 |      | 1.12 | 1.08 | 1.10 | 0.03 | 12  | 12.8 | 3.3E-176 |
| IPI00021700 | Cyclin                                                        | P12004   | 1.08 | 1.19 | 1.17 | 1.15 | 0.06 | 16  | 60.5 | 0        |
| IPI00021728 | Eukaryotic translation initiation factor 2 subunit 2          | P20042   | 0.96 | 0.93 | 0.89 | 0.92 | 0.04 | 21  | 57.7 | 0        |
| IPI00021766 | Foocen                                                        | Q9NQC3-1 | 1.17 |      | 0.95 | 1.06 | 0.16 | 7   | 9.6  | 3.2E-129 |
| IPI00021785 | Cytochrome c oxidase polypeptide Vb                           | P10606   | 1.04 | 1.03 | 1.05 | 1.04 | 0.01 | 5   | 24   | 9.06E-19 |
| IPI00021805 | Microsomal glutathione S-transferase 1                        | P10620   | 0.77 | 1.21 |      | 0.99 | 0.31 | 4   | 22.6 | 2.14E-31 |
| IPI00021807 | Acid beta-glucosidase                                         | P04062-1 | 1.17 | 1.52 | 1.35 | 1.35 | 0.18 | 5   | 11.9 | 5.01E-92 |
| IPI00021808 | Histidine--tRNA ligase                                        | P12081   | 0.89 | 1.01 | 1.01 | 0.97 | 0.07 | 21  | 43.6 | 3.9E-213 |
| IPI00021812 | Desmoyokin                                                    | Q09666   | 1.32 | 0.95 | 0.99 | 1.09 | 0.20 | 196 | 59.2 | 0        |
| IPI00021828 | CPI-B                                                         | P04080   | 1.09 | 1.15 | 1.15 | 1.13 | 0.03 | 4   | 55.1 | 2.2E-63  |

|             |                                                                            |          |      |      |      |      |      |    |      |          |
|-------------|----------------------------------------------------------------------------|----------|------|------|------|------|------|----|------|----------|
| IPI00021831 | cAMP-dependent protein kinase type I-alpha regulatory subunit              | P10644   | 1.03 | 1.19 | 1.14 | 1.12 | 0.08 | 13 | 36   | 3.3E-110 |
| IPI00021840 | 40S ribosomal protein S6                                                   | P62753   | 0.77 | 0.91 | 0.88 | 0.85 | 0.07 | 14 | 34.5 | 2.5E-211 |
| IPI00021888 | Histidine-rich membrane protein Ke4                                        | Q92504   | 0.82 | 1.14 | 0.91 | 0.95 | 0.16 | 1  | 3    | 3.01E-26 |
| IPI00021924 | Histone H1x                                                                | Q92522   | 1.60 | 1.24 | 1.40 | 1.41 | 0.18 | 8  | 32.4 | 8.94E-68 |
| IPI00021954 | Golgi-specific brefeldin A-resistance guanine nucleotide exchange factor 1 | Q92538   | 0.97 | 1.19 | 1.11 | 1.09 | 0.11 | 7  | 4.3  | 3.83E-33 |
| IPI00021978 | Peroxin-11B                                                                | O96011   | 1.06 | 1.26 | 1.18 | 1.17 | 0.10 | 4  | 15.4 | 2.82E-12 |
| IPI00021983 | Nicestrin                                                                  | Q92542-1 | 1.29 | 0.91 |      | 1.10 | 0.27 | 2  | 2.8  | 6.16E-05 |
| IPI00021985 | Transmembrane 9 superfamily member 4                                       | Q92544   |      |      | 0.78 | 0.78 |      | 2  | 5.6  | 1.44E-13 |
| IPI00022002 | cDNA FLJ54536, highly similar to Mitochondrial 28S ribosomal protein S27   | B4DRT2   | 0.83 | 0.88 | 0.95 | 0.89 | 0.06 | 7  | 21.5 | 1.5E-101 |
| IPI00022019 | 30 kDa Sin3-associated polypeptide                                         | O75446   |      |      | 1.18 | 1.18 |      | 3  | 16.4 | 0.016072 |
| IPI00022033 | Gamma-SNAP-associated factor 1                                             | Q9BXF6   |      |      | 0.89 | 0.89 |      | 1  | 4.3  | 1.23E-10 |
| IPI00022048 | CD9 partner 1                                                              | Q9P2B2   | 0.76 |      |      | 0.76 |      | 2  | 2.5  | 1.5E-05  |
| IPI00022078 | Differentiation-related gene 1 protein                                     | Q92597   | 1.50 | 1.87 | 1.60 | 1.65 | 0.19 | 3  | 13.7 | 6.72E-69 |
| IPI00022091 | Anaphase-promoting complex subunit 6                                       | Q13042-1 |      | 1.29 | 0.97 | 1.13 | 0.22 | 3  | 4.8  | 1.92E-19 |
| IPI00022095 | Embryonal carcinoma differentiation-regulated protein                      | Q86TG7-1 |      | 1.00 | 1.06 | 1.03 | 0.04 | 4  | 7.5  | 1.8E-139 |
| IPI00022133 | Erythrocyte membrane protein band 4.1-like 2                               | Q5JRN3   | 0.96 |      |      | 0.96 |      | 7  | 43.2 | 1.36E-70 |
| IPI00022145 | Nuclear ubiquitous casein and cyclin-dependent kinases substrate           | Q9H1E3-1 | 1.55 | 1.51 | 1.52 | 1.53 | 0.02 | 2  | 11.1 | 4.12E-22 |
| IPI00022164 | Leukemia-associated RhoGEF                                                 | Q9NZN5-1 | 0.85 | 1.13 |      | 0.99 | 0.20 | 2  | 2.8  | 1.7E-05  |
| IPI00022200 | Collagen alpha-3(VI) chain                                                 | P12111-1 | 0.93 | 0.77 | 0.86 | 0.85 | 0.08 | 86 | 35.4 | 0        |
| IPI00022202 | Phosphate carrier protein, mitochondrial                                   | Q00325-1 | 0.92 | 0.94 |      | 0.93 | 0.01 | 12 | 31.8 | 4.9E-136 |
| IPI00022215 | Activity-dependent neuroprotective protein                                 | Q9H2P0   | 1.05 | 1.12 | 1.03 | 1.07 | 0.05 | 11 | 15.9 | 5.55E-49 |
| IPI00022228 | High density lipoprotein-binding protein                                   | Q00341   | 0.84 | 0.98 | 0.97 | 0.93 | 0.08 | 33 | 32.2 | 0        |
| IPI00022229 | Apolipoprotein B-100                                                       | P04114   |      |      | 1.07 | 1.07 |      | 3  | 0.5  | 0.017366 |
| IPI00022239 | Methionine aminopeptidase 1                                                | P53582   | 0.86 | 1.12 | 1.04 | 1.01 | 0.13 | 10 | 35   | 5.6E-166 |
| IPI00022254 | APG3-like                                                                  | Q9NT62-1 | 0.88 | 1.09 | 0.91 | 0.96 | 0.11 | 7  | 25.5 | 7.63E-98 |
| IPI00022256 | Adapter-related protein complex 2 mu subunit                               | Q96CW1-1 |      | 1.12 | 1.17 | 1.15 | 0.04 | 15 | 36.8 | 1.6E-149 |
| IPI00022265 | Coiled-coil domain-containing protein 22                                   | O60826   | 1.12 | 0.93 | 1.10 | 1.05 | 0.11 | 3  | 8.9  | 1.31E-59 |

|             |                                                                                              |          |      |      |      |      |      |    |      |          |
|-------------|----------------------------------------------------------------------------------------------|----------|------|------|------|------|------|----|------|----------|
| IPI00022275 | Phosphatidylinositide phosphatase SAC1                                                       | Q9NTJ5   | 0.88 | 0.82 | 1.02 | 0.91 | 0.10 | 8  | 12.6 | 9.86E-94 |
| IPI00022277 | Coiled-coil domain-containing protein 56                                                     | Q9Y2R0   | 0.92 | 0.85 |      | 0.88 | 0.05 | 3  | 26.4 | 5.58E-06 |
| IPI00022305 | Basic leucine zipper and W2 domain-containing protein 2                                      | Q9Y6E2   | 0.86 | 0.92 | 1.12 | 0.97 | 0.14 | 7  | 18.4 | 2E-183   |
| IPI00022314 | Superoxide dismutase [Mn], mitochondrial                                                     | P04179   | 1.08 | 0.98 | 1.03 | 1.03 | 0.05 | 6  | 27.5 | 8.96E-35 |
| IPI00022316 | 28S ribosomal protein S18-2, mitochondrial                                                   | Q9Y676   | 0.83 | 0.90 | 1.00 | 0.91 | 0.09 | 6  | 34.5 | 3.86E-77 |
| IPI00022334 | Ornithine aminotransferase, hepatic form                                                     | P04181   | 1.03 | 1.22 | 1.27 | 1.18 | 0.12 | 12 | 37.1 | 7.2E-138 |
| IPI00022386 | ATP-binding protein associated with cell differentiation                                     | O14530   | 0.82 | 0.92 | 0.87 | 0.87 | 0.05 | 8  | 35.8 | 1.35E-47 |
| IPI00022403 | 39S ribosomal protein L13, mitochondrial                                                     | Q9BYD1   | 1.00 | 0.90 | 0.98 | 0.96 | 0.05 | 8  | 48.9 | 2.36E-36 |
| IPI00022418 | Anastellin                                                                                   | P02751-1 |      | 1.08 | 1.14 | 1.11 | 0.04 | 81 | 42   | 0        |
| IPI00022421 | COX7a-related protein                                                                        | O14548   |      |      | 0.95 | 0.95 |      | 2  | 40.4 | 2.25E-23 |
| IPI00022442 | Acyl carrier protein, mitochondrial                                                          | O14561   |      | 0.93 | 0.89 | 0.91 | 0.03 | 3  | 15.4 | 3.38E-27 |
| IPI00022462 | p90                                                                                          | P02786   | 0.80 | 0.68 | 0.88 | 0.79 | 0.10 | 13 | 23.4 | 0        |
| IPI00022477 | B-cell CLL/lymphoma 10                                                                       | O95999   | 1.01 | 1.29 | 1.30 | 1.20 | 0.17 | 5  | 18.9 | 1.03E-33 |
| IPI00022498 | Metallothionein-2                                                                            | P02795   | 0.53 |      |      | 0.53 |      | 4  | 50.8 | 4.05E-31 |
| IPI00022536 | 90 kDa ribosomal protein S6 kinase 4                                                         | O75676-1 | 0.74 | 1.18 |      | 0.96 | 0.31 | 3  | 3.8  | 1.79E-06 |
| IPI00022542 | p160 ROCK-1                                                                                  | Q13464   | 1.15 | 1.13 | 1.14 | 1.14 | 0.01 | 12 | 11.1 | 2.6E-40  |
| IPI00022543 | GPI8 homolog                                                                                 | Q92643   | 1.10 | 1.14 | 1.32 | 1.19 | 0.12 | 4  | 10.9 | 1.25E-29 |
| IPI00022558 | Myelin protein zero-like protein 1                                                           | O95297-1 | 1.21 | 1.13 | 1.21 | 1.18 | 0.05 | 4  | 17.1 | 8.93E-47 |
| IPI00022597 | NEDD8 carrier protein                                                                        | P61081   | 0.92 | 1.09 | 0.98 | 1.00 | 0.09 | 12 | 51.9 | 6.2E-134 |
| IPI00022613 | Nucleolar complex protein 14                                                                 | P78316-1 | 1.00 | 1.02 | 0.89 | 0.97 | 0.07 | 4  | 6.1  | 4.16E-13 |
| IPI00022628 | cDNA, FLJ93207, highly similar to Homo sapiens microtubule-associated protein 7 (MAP7), mRNA | B2R704   |      | 0.37 |      | 0.37 |      | 2  | 3.2  | 0.021431 |
| IPI00022629 | Protein regulator of cytokinesis 1                                                           | O43663-1 | 1.31 |      | 1.91 | 1.61 | 0.42 | 3  | 7.9  | 4.58E-07 |
| IPI00022648 | Eukaryotic translation initiation factor 5                                                   | P55010   | 0.73 | 0.99 | 0.90 | 0.87 | 0.13 | 10 | 24.1 | 2.21E-53 |
| IPI00022661 | Herpes virus entry mediator B                                                                | Q92692-1 | 1.01 |      |      | 1.01 |      | 2  | 4.1  | 5.75E-06 |
| IPI00022664 | Geranylgeranyl transferase type II subunit alpha                                             | Q92696   |      | 0.75 | 1.40 | 1.08 | 0.46 | 3  | 9.7  | 6.64E-18 |
| IPI00022694 | 26S proteasome non-ATPase regulatory subunit 4                                               | P55036-1 | 1.01 | 1.08 | 1.08 | 1.06 | 0.04 | 12 | 42.4 | 2.6E-198 |
| IPI00022697 | Developmentally-regulated GTP-binding protein 2                                              | P55039   | 0.87 | 1.10 | 1.09 | 1.02 | 0.13 | 2  | 8.5  | 1.6E-84  |

|             |                                                                |          |       |      |      |       |      |    |      |          |
|-------------|----------------------------------------------------------------|----------|-------|------|------|-------|------|----|------|----------|
| IPI00022744 | Cellular apoptosis susceptibility protein                      | P55060-1 | 0.99  | 1.02 | 1.02 | 1.01  | 0.02 | 36 | 38.9 | 0        |
| IPI00022745 | Mevalonate-PP decarboxylase                                    | P53602   | 1.62  | 1.29 | 1.85 | 1.59  | 0.28 | 2  | 5.8  | 6.9E-131 |
| IPI00022774 | 15S Mg(2+)-ATPase p97 subunit                                  | P55072   | 1.01  | 1.11 | 1.11 | 1.07  | 0.06 | 53 | 75.2 | 0        |
| IPI00022790 | Microfibrillar-associated protein 1                            | P55081   | 1.23  | 1.17 | 1.10 | 1.16  | 0.07 | 5  | 13.2 | 3.93E-34 |
| IPI00022793 | 3-ketoacyl-CoA thiolase                                        | P55084   | 1.15  | 0.95 | 1.21 | 1.11  | 0.14 | 8  | 22.2 | 8.99E-29 |
| IPI00022810 | Cathepsin C                                                    | P53634   | 0.91  | 0.67 | 0.88 | 0.82  | 0.13 | 3  | 9.3  | 7.16E-62 |
| IPI00022820 | General transcription factor TFIIB                             | Q00403   | 0.82  | 1.22 | 1.22 | 1.09  | 0.23 | 8  | 30.4 | 3E-102   |
| IPI00022824 | Bax-interacting factor 1                                       | Q9Y371-2 |       | 1.25 |      | 1.25  |      | 14 | 39.4 | 1.3E-165 |
| IPI00022827 | CTCL tumor antigen se20-9                                      | Q9H2G2-1 |       | 1.01 | 1.03 | 1.02  | 0.01 | 4  | 3.6  | 0.00104  |
| IPI00022865 | Cyclin-A2                                                      | P20248   |       |      | 1.43 | 1.43  |      | 2  | 7.9  | 6.25E-21 |
| IPI00022887 | Endoplasmic reticulum-Golgi intermediate compartment protein 1 | Q969X5-1 | 0.89  | 1.03 | 0.95 | 0.96  | 0.07 | 4  | 14.8 | 4.26E-85 |
| IPI00022892 | CDw90                                                          | P04216   | 1.08  | 1.07 | 1.09 | 1.08  | 0.01 | 2  | 18   | 1.91E-88 |
| IPI00022919 | Gene-rich cluster gene A protein                               | Q16538-1 | 0.92  |      |      | 0.92  |      | 2  | 3.7  | 0.004684 |
| IPI00022963 | CCNDBP1-interactor                                             | O95926   | 1.01  | 1.17 |      | 1.09  | 0.12 | 4  | 16.5 | 3.68E-39 |
| IPI00022990 | Statherin                                                      | P02808   | 11.11 |      |      | 11.11 |      | 3  | 54.8 | 1.32E-13 |
| IPI00023001 | E2-induced gene 5 protein                                      | Q96A26   | 1.12  |      | 0.86 | 0.99  | 0.18 | 6  | 40.3 | 3.58E-17 |
| IPI00023006 | Actin, alpha cardiac muscle 1                                  | P68032   | 0.87  | 0.98 | 0.99 | 0.95  | 0.07 | 28 | 56.5 | 0        |
| IPI00023020 | Alpha-inhibin-31                                               | P04279-1 |       |      | 0.36 | 0.36  |      | 3  | 10.8 | 6.9E-189 |
| IPI00023064 | Hormone-regulated proliferation-associated protein of 20 kDa   | Q9P032   | 0.89  | 0.77 | 0.79 | 0.82  | 0.06 | 5  | 28.6 | 7.12E-65 |
| IPI00023086 | 39S ribosomal protein L15, mitochondrial                       | Q9P015   | 0.87  | 0.96 | 0.96 | 0.93  | 0.05 | 7  | 31.4 | 5.09E-94 |
| IPI00023087 | Cell proliferation-inducing gene 50 protein                    | Q9NPD8   | 0.91  | 1.28 | 1.15 | 1.11  | 0.18 | 5  | 22.8 | 1.73E-14 |
| IPI00023095 | Myelodysplasia-myeloid leukemia factor 2                       | Q15773   |       |      | 1.18 | 1.18  |      | 1  | 4.8  | 9.99E-06 |
| IPI00023101 | Cell differentiation protein RCD1 homolog                      | Q92600   |       | 1.06 | 1.04 | 1.05  | 0.01 | 6  | 23.1 | 4.07E-56 |
| IPI00023103 | DSH homolog 2                                                  | O14641   | 0.94  | 1.52 | 1.28 | 1.25  | 0.29 | 4  | 7.6  | 1.04E-15 |
| IPI00023122 | LIM mineralization protein                                     | Q9NR12-1 | 0.80  | 0.97 | 0.91 | 0.89  | 0.08 | 17 | 55.6 | 1.4E-129 |
| IPI00023126 | WD repeat-containing protein 46                                | O15213   | 0.81  | 0.94 | 0.94 | 0.89  | 0.07 | 6  | 17.2 | 9.1E-151 |
| IPI00023138 | p21-Rac3                                                       | P60763   |       |      | 1.23 | 1.23  |      | 8  | 40.6 | 2.8E-129 |
| IPI00023161 | 39S ribosomal protein L46, mitochondrial                       | Q9H2W6   |       | 1.07 | 0.88 | 0.98  | 0.13 | 6  | 27.2 | 6.71E-79 |
| IPI00023177 | Chromatin assembly factor 1 subunit A                          | Q13111-1 | 1.15  |      | 1.12 | 1.13  | 0.02 | 3  | 7.2  | 1.54E-09 |

|             |                                                                                                        |          |      |      |      |      |      |    |      |          |
|-------------|--------------------------------------------------------------------------------------------------------|----------|------|------|------|------|------|----|------|----------|
| IPI00023191 | cDNA FLJ54710, highly similar to Target of Myb protein 1                                               | B4DKQ5   | 1.14 | 1.67 | 1.42 | 1.41 | 0.26 | 2  | 8    | 3.32E-56 |
| IPI00023205 | PRO2620                                                                                                | Q9H384   | 0.98 | 1.07 | 1.14 | 1.06 | 0.08 | 2  | 6.1  | 4.23E-46 |
| IPI00023234 | Anthracycline-associated resistance ARX                                                                | Q9UBT2   | 1.08 | 1.10 | 1.13 | 1.11 | 0.02 | 18 | 37.7 | 2.3E-184 |
| IPI00023322 | Apoptosis response zinc finger protein                                                                 | Q92785   | 1.00 | 1.07 | 0.83 | 0.97 | 0.12 | 3  | 13.3 | 5.71E-90 |
| IPI00023330 | LisH domain and HEAT repeat-containing protein KIAA1468                                                | Q9P260-2 | 0.93 |      | 1.23 | 1.08 | 0.21 | 4  | 4.6  | 3.03E-37 |
| IPI00023334 | 39S ribosomal protein L4, mitochondrial                                                                | Q9BYD3-1 | 1.02 | 0.80 | 0.87 | 0.90 | 0.11 | 4  | 18   | 4.3E-138 |
| IPI00023344 | Symplekin                                                                                              | Q92797-1 | 1.11 | 1.19 | 1.10 | 1.13 | 0.05 | 8  | 12.1 | 1.2E-170 |
| IPI00023406 | Cytochrome c-type heme lyase                                                                           | P53701   | 0.85 | 0.94 | 0.88 | 0.89 | 0.05 | 5  | 18.7 | 1.51E-27 |
| IPI00023409 | Nonsense mRNA reducing factor 3B                                                                       | Q9BZI7-1 |      | 1.28 | 1.41 | 1.34 | 0.09 | 5  | 10.6 | 1.01E-33 |
| IPI00023510 | Ras-related protein Rab-5A                                                                             | P20339   | 1.04 | 1.19 | 1.12 | 1.12 | 0.07 | 10 | 65.1 | 1E-270   |
| IPI00023529 | Cell division protein kinase 6                                                                         | Q00534   | 0.47 | 0.68 | 0.69 | 0.61 | 0.12 | 7  | 28.5 | 6.64E-63 |
| IPI00023530 | Cell division protein kinase 5                                                                         | Q00535   | 0.85 | 1.09 | 1.13 | 1.02 | 0.15 | 7  | 26   | 1.06E-45 |
| IPI00023532 | cDNA FLJ59743, weakly similar to Mus musculus spermatogenesis associated, serine-rich 2 (Spats2), mRNA | B4DRE6   | 0.98 | 1.18 | 1.00 | 1.05 | 0.11 | 8  | 18   | 4.35E-75 |
| IPI00023542 | Glycoprotein 25L2                                                                                      | Q9BVK6   | 0.87 | 1.00 | 1.05 | 0.97 | 0.09 | 9  | 40.4 | 1.5E-135 |
| IPI00023556 | RNA polymerase II subunit A C-terminal domain phosphatase SSU72                                        | Q9NP77-1 | 0.72 | 1.22 | 1.21 | 1.05 | 0.28 | 3  | 16.5 | 1.03E-55 |
| IPI00023591 | Purine-rich single-stranded DNA-binding protein alpha                                                  | Q00577   | 1.16 | 0.98 | 1.05 | 1.06 | 0.09 | 7  | 28.3 | 2.8E-110 |
| IPI00023598 | Tubulin 5 beta                                                                                         | P04350   | 0.96 | 1.13 | 1.10 | 1.06 | 0.09 | 28 | 69.4 | 0        |
| IPI00023605 | Binder of Rho GTPases 5                                                                                | Q00587-1 | 1.05 | 0.95 | 0.93 | 0.97 | 0.06 | 4  | 18.4 | 1.97E-54 |
| IPI00023640 | Programmed cell death protein 5                                                                        | O14737   |      | 0.88 | 0.78 | 0.83 | 0.07 | 6  | 48   | 2.5E-286 |
| IPI00023647 | Monocyte protein 4                                                                                     | A0AVT1-1 | 0.95 | 1.02 | 1.04 | 1.01 | 0.05 | 32 | 36.7 | 1.3E-288 |
| IPI00023649 | Monocyte protein 3                                                                                     | A3KN83-1 | 1.13 | 1.36 | 0.92 | 1.14 | 0.22 | 4  | 4.8  | 3.46E-70 |
| IPI00023704 | LIM domain-containing preferred translocation partner in lipoma                                        | Q93052   | 0.75 | 1.02 | 0.91 | 0.90 | 0.14 | 15 | 45.8 | 2.1E-170 |
| IPI00023728 | Conjugase                                                                                              | Q92820   | 1.08 | 0.87 | 1.00 | 0.98 | 0.11 | 5  | 20.4 | 6.79E-60 |
| IPI00023832 | Adapter protein HOFI                                                                                   | A1X283   | 1.34 | 1.44 |      | 1.39 | 0.07 | 4  | 7    | 9.71E-92 |
| IPI00023860 | NAP-1-related protein                                                                                  | P55209   | 0.89 | 0.88 | 0.88 | 0.88 | 0.01 | 10 | 25.8 | 7.5E-272 |
| IPI00023876 | Apoptotic protease Mch-2                                                                               | P55212-1 | 0.92 | 1.33 | 1.07 | 1.10 | 0.21 | 5  | 20.8 | 3.54E-14 |
| IPI00023919 | 26S protease regulatory subunit 8                                                                      | P62195   | 0.96 | 1.05 | 1.05 | 1.02 | 0.05 | 20 | 56.9 | 0        |

|             |                                                                      |          |      |      |      |      |      |    |      |          |
|-------------|----------------------------------------------------------------------|----------|------|------|------|------|------|----|------|----------|
| IPI00023939 | Guanine nucleotide exchange factor MSS4                              | P47224   | 1.14 |      | 1.22 | 1.18 | 0.06 | 1  | 8.9  | 0.002376 |
| IPI00023972 | DEAD box protein 47                                                  | Q9H0S4   | 0.89 | 0.92 | 1.07 | 0.96 | 0.10 | 10 | 31.2 | 4.6E-123 |
| IPI00023974 | Pituitary tumor-transforming gene 1 protein-interacting protein      | P53801   | 1.29 | 1.12 | 1.22 | 1.21 | 0.09 | 3  | 20.6 | 6.02E-89 |
| IPI00023987 | Phosphopantothenate--cysteine ligase                                 | Q9HAB8   | 1.30 | 1.11 | 1.17 | 1.19 | 0.10 | 6  | 20.9 | 2.38E-17 |
| IPI00024006 | Phosphoinositide 3-kinase adaptor protein                            | Q99570   | 1.10 | 1.13 | 0.92 | 1.05 | 0.11 | 4  | 3.9  | 1.67E-53 |
| IPI00024067 | Clathrin heavy chain 1                                               | Q00610-1 | 1.00 | 1.00 | 1.00 | 1.00 | 0.00 | 77 | 47   | 0        |
| IPI00024129 | Cyclophilin C                                                        | P45877   | 1.16 | 1.26 | 1.42 | 1.28 | 0.13 | 4  | 18.4 | 6.62E-56 |
| IPI00024143 | Adracalin                                                            | Q9NRG9   | 0.73 | 1.01 | 0.83 | 0.86 | 0.14 | 9  | 20   | 4.6E-60  |
| IPI00024157 | 25 kDa FK506-binding protein                                         | Q00688   | 1.34 | 1.05 | 1.07 | 1.15 | 0.16 | 16 | 49.6 | 9.5E-282 |
| IPI00024163 | DNA-directed RNA polymerase III largest subunit                      | O14802   |      |      | 1.08 | 1.08 |      | 1  | 1.4  | 2.09E-10 |
| IPI00024167 | ABT1-associated protein                                              | Q9H501   | 0.86 | 0.76 | 0.98 | 0.86 | 0.11 | 6  | 6.8  | 4.63E-15 |
| IPI00024175 | Proteasome subunit alpha type-7                                      | O14818-1 | 1.00 | 1.05 | 1.03 | 1.02 | 0.03 | 19 | 65.7 | 0        |
| IPI00024255 | G patch domain and KOW motifs-containing protein                     | Q92917   | 0.98 | 1.20 | 0.99 | 1.06 | 0.12 | 10 | 31.9 | 1.9E-102 |
| IPI00024279 | HEAT repeat-containing protein 1                                     | Q9H583   | 0.83 | 0.67 | 0.77 | 0.75 | 0.08 | 10 | 5.7  | 8.06E-67 |
| IPI00024281 | Component of gems 2                                                  | O14893-1 |      | 1.00 |      | 1.00 |      | 3  | 12.9 | 1.22E-05 |
| IPI00024282 | Ras-related protein Rab-8B                                           | Q92930   | 1.16 | 1.42 | 1.48 | 1.35 | 0.17 | 9  | 44.4 | 2.3E-108 |
| IPI00024283 | FENS-1                                                               | Q8IWB7   | 0.87 | 0.92 | 1.10 | 0.96 | 0.12 | 6  | 20.7 | 1.37E-55 |
| IPI00024284 | Basement membrane-specific heparan sulfate proteoglycan core protein | P98160   | 0.59 | 1.15 | 0.83 | 0.86 | 0.28 | 4  | 1.2  | 2.18E-17 |
| IPI00024291 | Bcl2 antagonist of cell death                                        | Q92934   | 1.50 |      | 1.19 | 1.34 | 0.22 | 1  | 9.5  | 4.57E-17 |
| IPI00024307 | Ephrin-B1                                                            | P98172   | 1.63 |      |      | 1.63 |      | 2  | 9    | 1.09E-15 |
| IPI00024320 | Putative RNA-binding protein 3                                       | P98179   | 0.96 | 1.06 | 1.06 | 1.03 | 0.06 | 6  | 39.5 | 2.2E-99  |
| IPI00024364 | Importin beta-2                                                      | Q92973-1 | 0.82 | 1.00 | 0.98 | 0.93 | 0.10 | 19 | 25.2 | 0        |
| IPI00024401 | Deubiquitinating enzyme 13                                           | Q92995   | 1.13 | 0.90 | 0.87 | 0.97 | 0.14 | 3  | 7.2  | 6.5E-38  |
| IPI00024403 | Copine III                                                           | O75131   | 1.10 | 1.22 | 1.12 | 1.15 | 0.07 | 17 | 40.2 | 2.2E-114 |
| IPI00024417 | Huntingtin-interacting protein 12                                    | O75146   | 0.87 | 1.11 |      | 0.99 | 0.17 | 2  | 3    | 8.13E-62 |
| IPI00024425 | Putative uncharacterized protein KIAA0664                            | C9J6D7   | 0.73 |      |      | 0.73 |      | 6  | 5.2  | 5E-17    |
| IPI00024462 | Dihydroorotate dehydrogenase, mitochondrial                          | Q02127   | 1.18 | 0.60 | 0.65 | 0.81 | 0.32 | 3  | 11.4 | 1.39E-11 |
| IPI00024466 | UDP--Glc:glycoprotein glucosyltransferase                            | Q9NYU2-1 | 1.13 | 1.07 | 1.10 | 1.10 | 0.03 | 23 | 22.1 | 0        |
| IPI00024502 | Ataxin-1 ubiquitin-like-interacting protein A1U                      | Q9NRR5   | 1.57 |      | 1.14 | 1.35 | 0.31 | 4  | 10.6 | 1.25E-24 |

|             |                                                    |          |      |      |      |      |      |    |      |          |
|-------------|----------------------------------------------------|----------|------|------|------|------|------|----|------|----------|
| IPI00024523 | DnaJ homolog subfamily B member 6                  | O75190-1 | 1.00 | 1.18 | 1.22 | 1.13 | 0.12 | 3  | 10.4 | 1.02E-15 |
| IPI00024524 | RNA-binding protein PNO1                           | Q9NRX1   | 0.66 | 0.90 | 0.85 | 0.80 | 0.12 | 5  | 26.2 | 4.6E-100 |
| IPI00024551 | UPF0480 protein C15orf24                           | Q9NPA0   | 0.99 | 0.92 | 1.01 | 0.97 | 0.04 | 5  | 24.8 | 2.24E-17 |
| IPI00024579 | E3 ubiquitin-protein ligase RAD18                  | Q9NS91   | 0.80 | 0.53 | 0.82 | 0.72 | 0.16 | 3  | 8.9  | 3.4E-29  |
| IPI00024620 | Enhancer of yellow 2 transcription factor homolog  | Q9NPA8   | 1.00 | 1.10 | 1.06 | 1.05 | 0.05 | 4  | 37.6 | 9.01E-35 |
| IPI00024642 | Coiled-coil domain-containing protein 47           | Q96A33-1 | 0.94 | 0.99 | 1.03 | 0.99 | 0.04 | 9  | 19.5 | 9.54E-38 |
| IPI00024658 | Cellular zinc finger anti-NF-kappa-B protein       | Q6GQQ9   |      | 1.29 | 1.09 | 1.19 | 0.14 | 4  | 10.1 | 5.09E-62 |
| IPI00024661 | Protein transport protein Sec24C                   | P53992   | 0.96 | 1.20 | 1.05 | 1.07 | 0.12 | 13 | 17.6 | 8.64E-52 |
| IPI00024662 | Antigen p25                                        | P45973   | 1.18 | 1.36 | 1.36 | 1.30 | 0.10 | 14 | 56.5 | 5.3E-154 |
| IPI00024664 | Deubiquitinating enzyme 5                          | P45974-1 | 1.02 | 1.20 | 1.15 | 1.12 | 0.09 | 25 | 41.6 | 0        |
| IPI00024670 | Polyposis locus protein 1                          | Q00765   | 0.82 | 1.16 | 1.19 | 1.06 | 0.21 | 9  | 31.2 | 2.29E-56 |
| IPI00024674 | c-Jun N-terminal kinase kinase 1                   | B2R7N7   | 1.05 | 1.19 | 1.24 | 1.16 | 0.10 | 6  | 19   | 4.23E-59 |
| IPI00024698 | 38 kDa nuclear protein containing a WW domain      | O60828-1 | 0.93 | 1.02 | 0.86 | 0.94 | 0.08 | 5  | 30.6 | 1.5E-160 |
| IPI00024705 | GAIP C-terminus-interacting protein                | O14908   | 1.13 | 1.02 | 0.99 | 1.05 | 0.07 | 7  | 27   | 3.36E-56 |
| IPI00024719 | Histone acetyltransferase type B catalytic subunit | O14929   | 1.05 | 1.20 | 1.13 | 1.12 | 0.08 | 15 | 43.7 | 0        |
| IPI00024742 | Complex III subunit 8                              | O14949   | 0.98 | 0.92 | 0.99 | 0.96 | 0.04 | 4  | 24.4 | 1.37E-19 |
| IPI00024775 | Rab-7-like protein 1                               | O14966   | 1.11 |      |      | 1.11 |      | 2  | 10.3 | 1.06E-13 |
| IPI00024781 | Gastric cancer-related protein VRG107              | P84101   | 1.14 | 1.43 | 1.18 | 1.25 | 0.16 | 2  | 32.2 | 8.57E-06 |
| IPI00024816 | Mitochondrial fission factor                       | Q9GZY8-2 |      |      | 0.86 | 0.86 |      | 5  | 33   | 2.13E-16 |
| IPI00024821 | 26S proteasome non-ATPase regulatory subunit 14    | O00487   | 0.94 | 1.05 | 1.07 | 1.02 | 0.07 | 5  | 31   | 4.76E-83 |
| IPI00024871 | Core-binding factor subunit beta                   | Q13951-2 | 0.88 | 1.14 | 1.10 | 1.04 | 0.14 | 6  | 34.2 | 8.4E-202 |
| IPI00024911 | Endoplasmic reticulum resident protein 28          | P30040   | 1.24 | 1.05 | 1.13 | 1.14 | 0.10 | 15 | 49.8 | 3.8E-214 |
| IPI00024913 | ES1 protein homolog, mitochondrial                 | P30042-1 | 0.85 | 1.03 |      | 0.94 | 0.12 | 3  | 22.8 | 2.44E-55 |
| IPI00024915 | Alu corepressor 1                                  | P30044-1 | 1.13 | 1.23 | 1.26 | 1.21 | 0.07 | 12 | 57.5 | 1.1E-240 |
| IPI00024919 | Antioxidant protein 1                              | P30048   | 0.95 | 1.02 | 1.06 | 1.01 | 0.05 | 8  | 37.5 | 1.7E-103 |
| IPI00024920 | ATP synthase subunit delta, mitochondrial          | P30049   | 1.14 | 0.96 | 0.87 | 0.99 | 0.14 | 3  | 17.3 | 1.18E-48 |
| IPI00024933 | 60S ribosomal protein L12                          | P30050-1 | 0.88 | 0.90 | 0.87 | 0.88 | 0.01 | 10 | 64.8 | 0        |
| IPI00024934 | Methylmalonyl-CoA isomerase                        | P22033   | 1.00 | 1.29 | 1.45 | 1.25 | 0.23 | 5  | 6.7  | 9.46E-14 |
| IPI00024971 | Oxysterol-binding protein 1                        | P22059-1 | 1.05 | 1.04 | 1.11 | 1.07 | 0.04 | 8  | 16.2 | 1.5E-103 |



|             |                                                    |          |      |      |      |      |      |    |      |          |
|-------------|----------------------------------------------------|----------|------|------|------|------|------|----|------|----------|
| IPI00024975 | Kinesin-like protein 2                             | Q9NS87-1 | 0.96 | 1.35 | 1.01 | 1.11 | 0.21 | 4  | 3.3  | 7.06E-64 |
| IPI00024976 | 1C9-2                                              | Q9NS69   | 0.96 | 0.85 | 0.86 | 0.89 | 0.06 | 4  | 51.4 | 2.2E-210 |
| IPI00024993 | Enoyl-CoA hydratase 1                              | P30084   | 0.94 | 1.09 | 1.07 | 1.04 | 0.08 | 14 | 53.8 | 3.2E-257 |
| IPI00025019 | Macropain subunit C5                               | P20618   | 0.93 | 1.01 | 1.05 | 1.00 | 0.06 | 11 | 47.3 | 5.7E-193 |
| IPI00025039 | 34 kDa nucleolar scleroderma antigen               | P22087   | 0.91 | 0.81 | 0.87 | 0.87 | 0.05 | 14 | 42.4 | 1.1E-157 |
| IPI00025049 | 46 kDa mannose 6-phosphate receptor                | P20645   | 1.22 | 1.06 | 1.12 | 1.13 | 0.08 | 5  | 24.9 | 1.1E-145 |
| IPI00025050 | Tryptophanyl tRNA synthetase 2, mitochondrial      | Q9UGM6   | 0.91 |      | 0.19 | 0.55 | 0.51 | 6  | 17.8 | 1.3E-19  |
| IPI00025081 | Ran guanine nucleotide release factor              | Q9HD47-1 |      |      | 0.86 | 0.86 |      | 2  | 16.7 | 3.09E-05 |
| IPI00025084 | Calcium-activated neutral proteinase small subunit | P04632   | 1.01 | 1.12 | 1.13 | 1.09 | 0.07 | 15 | 71.3 | 0        |
| IPI00025086 | Cytochrome c oxidase polypeptide Va                | P20674   | 0.94 | 1.00 | 0.95 | 0.96 | 0.03 | 6  | 37.3 | 1.22E-51 |
| IPI00025087 | Antigen NY-CO-13                                   | P04637-1 | 1.21 | 1.35 | 1.34 | 1.30 | 0.08 | 15 | 37.9 | 9.8E-134 |
| IPI00025091 | 40S ribosomal protein S11                          | P62280   | 0.78 | 0.98 | 0.92 | 0.89 | 0.10 | 20 | 72.8 | 5E-181   |
| IPI00025156 | Antigen NY-CO-7                                    | Q9UNE7-1 | 1.04 | 1.19 | 1.16 | 1.13 | 0.08 | 6  | 21.5 | 2.73E-85 |
| IPI00025158 | Cohesin subunit SA-1                               | Q8WVM7   |      | 0.99 |      | 0.99 |      | 3  | 3.7  | 0.00661  |
| IPI00025174 | Antigen NY-CO-10                                   | Q6UX04-1 | 1.08 | 1.03 | 1.01 | 1.04 | 0.03 | 4  | 12.9 | 1.65E-75 |
| IPI00025176 | 30 kDa splicing factor SMNrp                       | O75940   | 1.40 | 1.04 | 0.89 | 1.11 | 0.26 | 4  | 34   | 1.08E-51 |
| IPI00025178 | Breast carcinoma-amplified sequence 2              | O75934   | 0.95 | 0.96 | 0.93 | 0.94 | 0.02 | 12 | 48.4 | 4.3E-125 |
| IPI00025239 | Complex I-49kD                                     | O75306   | 0.84 | 1.08 | 1.13 | 1.01 | 0.16 | 6  | 16.6 | 3.85E-73 |
| IPI00025244 | Zinc finger protein 259                            | O75312   | 0.95 | 0.85 | 0.86 | 0.89 | 0.06 | 9  | 19.4 | 5.9E-249 |
| IPI00025252 | 58 kDa glucose-regulated protein                   | P30101   | 1.10 | 1.07 | 1.14 | 1.10 | 0.04 | 38 | 72.9 | 0        |
| IPI00025257 | Semaphorin 7A                                      | O75326   |      | 0.62 |      | 0.62 |      | 1  | 2.3  | 0.000515 |
| IPI00025273 | 5-phosphoribosylglycinamide transformylase         | P22102-1 | 0.89 | 0.94 | 0.92 | 0.92 | 0.03 | 30 | 42   | 3.1E-193 |
| IPI00025277 | Apoptosis-linked gene 2 protein                    | O75340   | 1.10 | 1.16 | 1.15 | 1.14 | 0.04 | 8  | 52.4 | 1.39E-69 |
| IPI00025285 | Vacuolar proton pump subunit G 1                   | O75348   | 0.99 | 1.22 | 1.05 | 1.09 | 0.12 | 4  | 25.4 | 3.7E-109 |
| IPI00025318 | SH3 domain-binding glutamic acid-rich-like protein | O75368   | 1.14 | 1.37 | 1.38 | 1.30 | 0.14 | 14 | 85.1 | 1E-217   |
| IPI00025329 | 60S ribosomal protein L19                          | P84098   | 0.89 | 0.89 | 0.85 | 0.88 | 0.03 | 13 | 36.2 | 6.4E-212 |
| IPI00025340 | Pyridoxal phosphate phosphatase                    | Q96GD0   |      | 1.15 | 1.06 | 1.10 | 0.07 | 6  | 25.3 | 1.5E-104 |
| IPI00025344 | Complex I-13kD-A                                   | O75380   | 1.10 | 0.92 | 1.16 | 1.06 | 0.13 | 2  | 23.4 | 3.49E-17 |
| IPI00025346 | Peroxin-14                                         | O75381-1 | 1.43 | 0.97 | 1.04 | 1.15 | 0.25 | 3  | 9.8  | 7.33E-23 |

|             |                                                                               |          |      |      |      |      |      |    |      |          |
|-------------|-------------------------------------------------------------------------------|----------|------|------|------|------|------|----|------|----------|
| IPI00025347 | Nucleolar protein EMG1 homolog                                                | Q92979   | 0.79 | 0.97 | 0.89 | 0.89 | 0.09 | 5  | 28.7 | 2.85E-61 |
| IPI00025366 | Citrate synthase, mitochondrial                                               | O75390   | 0.88 | 0.96 | 0.98 | 0.94 | 0.05 | 14 | 26.4 | 1.11E-91 |
| IPI00025418 | Collagen alpha-1(VII) chain                                                   | Q02388-1 | 1.36 | 0.84 | 0.89 | 1.03 | 0.28 | 4  | 2.6  | 7.31E-29 |
| IPI00025491 | ATP-dependent RNA helicase eIF4A-1                                            | P60842   | 0.86 | 0.87 | 0.92 | 0.88 | 0.03 | 27 | 61.3 | 0        |
| IPI00025512 | 28 kDa heat shock protein                                                     | P04792   | 1.09 | 0.98 | 1.01 | 1.03 | 0.06 | 22 | 84.9 | 0        |
| IPI00025616 | DNA polymerase delta subunit 2                                                | P49005   | 0.84 | 0.96 | 1.13 | 0.98 | 0.15 | 4  | 14.9 | 5E-118   |
| IPI00025710 | Uncharacterized protein C21orf59                                              | P57076   | 0.76 |      |      | 0.76 |      | 4  | 18.6 | 1.11E-47 |
| IPI00025712 | TAK1-like protein                                                             | P57077-1 |      |      | 1.12 | 1.12 |      | 1  | 5    | 0.000965 |
| IPI00025717 | Metaxin-2                                                                     | O75431   | 0.84 | 1.00 | 1.00 | 0.95 | 0.09 | 7  | 29.3 | 4.8E-221 |
| IPI00025718 | tRNA (guanine-N(7)-)-methyltransferase subunit WDR4                           | P57081-1 | 0.72 | 0.97 | 0.78 | 0.82 | 0.13 | 3  | 13.8 | 9.26E-52 |
| IPI00025721 | COP9 signalosome complex subunit 3                                            | Q9UNS2   | 0.87 | 1.07 | 1.00 | 0.98 | 0.10 | 9  | 27.9 | 1.2E-235 |
| IPI00025796 | Complex I-30kD                                                                | O75489   | 1.11 | 0.97 | 1.04 | 1.04 | 0.07 | 14 | 50   | 4.9E-212 |
| IPI00025807 | SPR-2                                                                         | Q02447-1 |      |      | 0.98 | 0.98 |      | 2  | 3.2  | 3.3E-51  |
| IPI00025815 | TAR DNA-binding protein 43                                                    | Q13148   | 0.95 | 1.23 | 1.19 | 1.12 | 0.15 | 10 | 38.5 | 7.3E-243 |
| IPI00025849 | Acidic leucine-rich nuclear phosphoprotein 32 family member A                 | P39687   | 1.10 | 1.00 | 1.02 | 1.04 | 0.05 | 15 | 43   | 0        |
| IPI00025874 | Dolichyl-diphosphooligosaccharide--protein glycosyltransferase 67 kDa subunit | P04843   | 1.03 | 0.86 | 1.10 | 1.00 | 0.12 | 29 | 55   | 0        |
| IPI00025890 | Mitochondrial distribution and morphology protein 20                          | Q14CX7-1 | 1.04 | 1.04 | 0.86 | 0.98 | 0.11 | 10 | 13.8 | 2.19E-33 |
| IPI00025974 | Charged multivesicular body protein 4b                                        | Q9H444   | 1.39 | 1.09 | 1.15 | 1.21 | 0.16 | 5  | 27.2 | 1.3E-187 |
| IPI00026054 | MAP kinase-activated protein kinase 2                                         | P49137-1 | 1.03 |      |      | 1.03 |      | 2  | 5    | 0.01539  |
| IPI00026087 | Barrier-to-autointegration factor                                             | O75531   | 0.88 | 1.15 | 1.14 | 1.06 | 0.15 | 4  | 42.7 | 1.4E-73  |
| IPI00026089 | Pre-mRNA-splicing factor SF3b 155 kDa subunit                                 | O75533   | 1.09 | 1.05 | 1.09 | 1.08 | 0.02 | 35 | 31.7 | 2.2E-248 |
| IPI00026105 | Non-specific lipid-transfer protein                                           | P22307-1 | 0.88 | 1.05 | 1.12 | 1.01 | 0.13 | 11 | 13.9 | 6.3E-101 |
| IPI00026111 | Transmembrane and coiled-coil domain-containing protein 1                     | Q9UM00-1 | 0.70 | 1.02 | 1.19 | 0.97 | 0.25 | 7  | 29.3 | 4.81E-26 |
| IPI00026154 | cDNA FLJ59211, highly similar to Glucosidase 2 subunit beta                   | B4DJQ5   | 1.30 | 0.97 | 1.02 | 1.09 | 0.18 | 22 | 45.4 | 0        |
| IPI00026182 | CapZ alpha-2                                                                  | P47755   | 1.03 | 1.11 | 1.18 | 1.11 | 0.08 | 12 | 56.6 | 8.8E-219 |
| IPI00026202 | 60S ribosomal protein L18a                                                    | Q02543   | 0.80 | 0.94 | 0.88 | 0.87 | 0.07 | 10 | 43.2 | 5.1E-149 |
| IPI00026215 | DNase IV                                                                      | P39748   | 1.24 | 1.37 | 1.29 | 1.30 | 0.07 | 15 | 43.7 | 0        |

|             |                                                                  |          |      |      |      |      |      |    |      |          |
|-------------|------------------------------------------------------------------|----------|------|------|------|------|------|----|------|----------|
| IPI00026216 | Puromycin-sensitive aminopeptidase                               | P55786   | 1.14 | 1.12 | 1.17 | 1.14 | 0.02 | 23 | 32.5 | 0        |
| IPI00026219 | Cleavage and polyadenylation specificity factor 160 kDa subunit  | Q10570   | 1.17 | 1.01 | 1.06 | 1.08 | 0.08 | 6  | 5.9  | 1.3E-114 |
| IPI00026230 | FTP-3                                                            | P55795   | 1.16 | 1.39 | 1.02 | 1.19 | 0.19 | 12 | 36.3 | 0        |
| IPI00026262 | p120GAP                                                          | P20936-1 | 0.97 | 0.92 | 1.04 | 0.98 | 0.06 | 6  | 7.4  | 5.13E-84 |
| IPI00026268 | Guanine nucleotide-binding protein G(I)/G(S)/G(T) subunit beta-1 | P62873   | 1.18 | 1.51 | 1.43 | 1.37 | 0.17 | 12 | 50.3 | 0        |
| IPI00026271 | 40S ribosomal protein S14                                        | P62263   | 0.81 | 0.90 | 0.80 | 0.84 | 0.05 | 11 | 43   | 2.2E-101 |
| IPI00026272 | Histone H2A type 1-B/E                                           | P04908   |      | 1.02 | 1.11 | 1.07 | 0.07 | 5  | 35.4 | 5.5E-181 |
| IPI00026302 | 60S ribosomal protein L31                                        | P62899   |      |      | 0.85 | 0.85 |      | 7  | 46.4 | 1.4E-103 |
| IPI00026307 | Cell division cycle 40 homolog                                   | O60508   | 0.86 | 1.30 | 1.20 | 1.12 | 0.23 | 3  | 8.8  | 2.08E-22 |
| IPI00026309 | Geminin                                                          | O75496   | 1.29 |      |      | 1.29 |      | 3  | 19.1 | 1.07E-05 |
| IPI00026314 | Actin-depolymerizing factor                                      | P06396-1 | 1.31 | 1.45 | 1.55 | 1.44 | 0.12 | 19 | 32.9 | 0        |
| IPI00026320 | E3 ubiquitin-protein ligase UBR5                                 | O95071   | 0.94 | 0.92 | 1.10 | 0.99 | 0.10 | 3  | 1.9  | 6.08E-35 |
| IPI00026328 | Endoplasmic reticulum resident protein 18                        | O95881   | 1.25 | 1.07 | 1.07 | 1.13 | 0.10 | 9  | 47.1 | 6.5E-116 |
| IPI00026337 | Ran-binding protein 3                                            | Q9H6Z4-1 | 1.41 | 1.12 | 1.06 | 1.20 | 0.19 | 9  | 20.6 | 1E-101   |
| IPI00026448 | Mitochondrial fission factor                                     | Q9GZY8-1 | 0.68 | 1.00 |      | 0.84 | 0.23 | 3  | 19.6 | 1.55E-22 |
| IPI00026496 | Nucleoplasmin-3                                                  | O75607   | 1.07 | 0.72 | 0.82 | 0.87 | 0.18 | 2  | 14.6 | 5.43E-08 |
| IPI00026512 | Conserved ERA-like GTPase                                        | O75616-1 |      | 0.96 |      | 0.96 |      | 4  | 9.6  | 4.62E-07 |
| IPI00026513 | Phosphoriboisomerase                                             | P49247   | 0.98 | 0.81 | 0.98 | 0.92 | 0.10 | 5  | 19.3 | 9E-18    |
| IPI00026516 | 3-oxoacid-CoA transferase 1                                      | P55809   |      | 1.23 | 1.18 | 1.21 | 0.03 | 5  | 13.5 | 2.58E-21 |
| IPI00026519 | Cyclophilin F                                                    | P30405   | 0.82 | 0.93 | 0.91 | 0.89 | 0.06 | 7  | 32.9 | 1.1E-58  |
| IPI00026530 | ER-Golgi intermediate compartment 53 kDa protein                 | P49257   | 1.10 | 1.01 | 1.04 | 1.05 | 0.05 | 14 | 32.5 | 1.9E-111 |
| IPI00026546 | PAF acetylhydrolase 30 kDa subunit                               | P68402   | 1.16 | 1.18 | 1.16 | 1.16 | 0.01 | 6  | 26.2 | 3.82E-80 |
| IPI00026555 | Mitochondrial tRNA-specific 2-thiouridylase 1                    | O75648-1 | 1.01 |      |      | 1.01 |      | 2  | 6.9  | 0.000118 |
| IPI00026570 | Cytochrome c oxidase subunit 7A2, mitochondrial                  | P14406   |      |      | 0.96 | 0.96 |      | 2  | 20   | 1.79E-36 |
| IPI00026606 | Surfeit locus protein 6                                          | O75683   | 1.08 | 0.96 | 1.11 | 1.05 | 0.08 | 5  | 22.7 | 1.85E-19 |
| IPI00026612 | Protein phosphatase 1B                                           | O75688-1 | 1.02 | 1.51 | 1.19 | 1.24 | 0.25 | 5  | 10.6 | 1.1E-153 |
| IPI00026625 | 155 kDa nucleoporin                                              | O75694-1 | 0.94 | 0.96 | 0.90 | 0.93 | 0.03 | 15 | 12.9 | 1.5E-229 |
| IPI00026627 | Protein XRP2                                                     | O75695   | 1.10 | 1.14 | 1.38 | 1.21 | 0.15 | 5  | 11.7 | 2.02E-26 |

|             |                                                                                       |          |      |      |      |      |      |    |      |          |
|-------------|---------------------------------------------------------------------------------------|----------|------|------|------|------|------|----|------|----------|
| IPI00026665 | cDNA FLJ75085, highly similar to Homo sapiens glutaminyl-tRNA synthetase (QARS), mRNA | A8K3A8   | 0.88 | 1.07 | 0.97 | 0.98 | 0.10 | 26 | 37.7 | 1.9E-198 |
| IPI00026669 | Membrane-anchored ubiquitin-fold protein                                              | O95164   | 1.03 |      |      | 1.03 |      | 2  | 23.1 | 1.35E-65 |
| IPI00026670 | Elongin 18 kDa subunit                                                                | Q15370   |      |      | 1.18 | 1.18 |      | 8  | 97.5 | 2.72E-54 |
| IPI00026689 | Cell division control protein 2 homolog                                               | P06493-1 | 1.08 | 1.21 | 1.22 | 1.17 | 0.07 | 14 | 50.8 | 2.2E-275 |
| IPI00026781 | [Acyl-carrier-protein] S-acetyltransferase                                            | P49327   | 1.62 | 1.27 | 1.38 | 1.42 | 0.18 | 78 | 40.3 | 0        |
| IPI00026813 | CAAX farnesyltransferase subunit alpha                                                | P49354-1 | 1.30 | 1.13 | 1.26 | 1.23 | 0.09 | 9  | 31.7 | 3.7E-114 |
| IPI00026824 | Heme oxygenase 2                                                                      | P30519   | 0.99 | 1.20 | 1.02 | 1.07 | 0.11 | 8  | 29.5 | 3.2E-108 |
| IPI00026829 | Deoxyhypusine synthase                                                                | P49366-1 |      | 0.95 | 0.81 | 0.88 | 0.10 | 5  | 19.5 | 9.5E-119 |
| IPI00026833 | Adenylosuccinate synthetase isozyme 2                                                 | P30520   | 0.96 | 1.12 | 1.06 | 1.05 | 0.08 | 15 | 38.8 | 4.4E-219 |
| IPI00026848 | Alpha-2-macroglobulin receptor-associated protein                                     | P30533   | 1.52 | 1.13 | 1.25 | 1.30 | 0.20 | 15 | 37.5 | 2.4E-142 |
| IPI00026940 | 50 kDa nucleoporin                                                                    | Q9UKX7   | 0.90 | 1.09 | 0.99 | 0.99 | 0.10 | 12 | 41.2 | 1.1E-144 |
| IPI00026942 | Endoplasmic reticulum lipid raft-associated protein 2                                 | O94905-1 | 1.29 | 1.17 | 1.21 | 1.22 | 0.06 | 9  | 21.8 | 5.7E-105 |
| IPI00026964 | Complex III subunit 5                                                                 | P47985   | 0.86 | 0.82 | 0.82 | 0.83 | 0.02 | 9  | 29.6 | 2.2E-264 |
| IPI00026969 | p125                                                                                  | Q9Y6Y8-1 | 0.96 | 1.17 | 1.22 | 1.12 | 0.14 | 6  | 8    | 4.35E-17 |
| IPI00026970 | Chromatin-specific transcription elongation factor 140 kDa subunit                    | Q9Y5B9   | 1.01 | 1.13 | 1.07 | 1.07 | 0.06 | 30 | 32.5 | 0        |
| IPI00026993 | E3 ubiquitin-protein ligase RING2                                                     | Q99496   | 1.12 | 1.43 |      | 1.28 | 0.22 | 3  | 12.8 | 2.12E-07 |
| IPI00026994 | PRA1 family protein 2                                                                 | O60831   | 1.04 | 1.10 | 1.14 | 1.09 | 0.05 | 3  | 22.5 | 2.98E-28 |
| IPI00027009 | Protein kinase C and casein kinase substrate in neurons protein 2                     | Q9UNF0-1 | 1.03 | 1.13 | 1.12 | 1.09 | 0.06 | 12 | 25.9 | 8.08E-93 |
| IPI00027014 | Dynactin complex subunit 22 kDa subunit                                               | O75935-1 | 1.12 | 1.13 | 1.12 | 1.12 | 0.01 | 6  | 26.3 | 2.76E-12 |
| IPI00027032 | Acyl-protein thioesterase 2                                                           | O95372   | 0.93 | 0.86 | 1.10 | 0.96 | 0.12 | 3  | 14.7 | 3E-10    |
| IPI00027035 | cDNA FLJ61157, highly similar to XPA-binding protein 1                                | B4DQM4   | 0.94 | 1.18 | 1.06 | 1.06 | 0.12 | 3  | 12.1 | 4.61E-47 |
| IPI00027078 | Carboxypeptidase D                                                                    | O75976   |      |      | 0.87 | 0.87 |      | 3  | 4.8  | 8.18E-33 |
| IPI00027096 | 39S ribosomal protein L15, mitochondrial                                              | P49406   | 0.84 | 0.92 | 0.93 | 0.90 | 0.05 | 5  | 17.8 | 5.02E-12 |
| IPI00027107 | Elongation factor Tu, mitochondrial                                                   | P49411   | 0.90 | 0.95 | 0.93 | 0.93 | 0.02 | 25 | 58.2 | 0        |
| IPI00027139 | Inositol polyphosphate 1-phosphatase                                                  | P49441   | 0.88 | 1.19 | 1.25 | 1.10 | 0.20 | 2  | 7.3  | 3.44E-89 |
| IPI00027142 | Ribonuclease P protein subunit p20                                                    | O75817   | 0.87 |      | 1.12 | 1.00 | 0.17 | 1  | 10.7 | 7.46E-40 |
| IPI00027166 | TIMP metalloproteinase inhibitor 2                                                    | P16035   | 1.25 |      | 1.77 | 1.51 | 0.36 | 4  | 22.7 | 7.19E-35 |

|             |                                                                                                                                                                   |          |      |      |      |      |      |    |      |          |
|-------------|-------------------------------------------------------------------------------------------------------------------------------------------------------------------|----------|------|------|------|------|------|----|------|----------|
| IPI00027175 | 22 kDa protein                                                                                                                                                    | P30626   | 0.98 | 1.12 | 1.00 | 1.03 | 0.07 | 10 | 52   | 2.3E-145 |
| IPI00027180 | CAAX prenyl protease 1 homolog                                                                                                                                    | O75844   | 0.77 | 0.97 | 1.13 | 0.96 | 0.18 | 5  | 9.5  | 5.1E-144 |
| IPI00027192 | cDNA, FLJ92537, highly similar to Homo sapiens procollagen-lysine, 2-oxoglutarate 5-dioxygenase (lysine hydroxylase, Ehlers-Danlos syndrome type VI) (PLOD), mRNA | B2R5M9   | 1.18 | 1.08 | 1.22 | 1.16 | 0.07 | 30 | 47.4 | 0        |
| IPI00027194 | Cell growth-inhibiting gene 9 protein                                                                                                                             | Q9P2W9   |      | 1.10 |      | 1.10 |      | 1  | 6.3  | 1.58E-08 |
| IPI00027223 | Cytosolic NADP-isocitrate dehydrogenase                                                                                                                           | O75874   | 1.43 | 1.69 | 1.67 | 1.60 | 0.15 | 22 | 57   | 0        |
| IPI00027228 | Cytochrome oxidase assembly factor PET112 homolog                                                                                                                 | O75879   | 0.89 |      |      | 0.89 |      | 2  | 4.7  | 5.13E-15 |
| IPI00027230 | 94 kDa glucose-regulated protein                                                                                                                                  | P14625   | 1.11 | 1.00 | 1.06 | 1.06 | 0.05 | 67 | 65.1 | 0        |
| IPI00027233 | Protein SCO1 homolog, mitochondrial                                                                                                                               | O75880   | 0.90 | 0.99 | 1.01 | 0.97 | 0.06 | 3  | 11   | 7.5E-17  |
| IPI00027240 | Guanine nucleotide-binding protein G(I)/G(S)/G(O) subunit gamma-5                                                                                                 | P63218   | 1.92 |      | 1.94 | 1.93 | 0.01 | 3  | 26.5 | 0.000257 |
| IPI00027251 | NDR1 protein kinase                                                                                                                                               | Q15208   | 1.12 | 1.19 | 1.34 | 1.21 | 0.12 | 5  | 17.8 | 1.05E-12 |
| IPI00027252 | B-cell receptor-associated protein BAP37                                                                                                                          | Q99623   | 0.93 | 0.85 | 0.94 | 0.91 | 0.05 | 19 | 64.9 | 0        |
| IPI00027253 | GABA(A) receptor-associated protein                                                                                                                               | O95166   | 1.05 | 1.21 |      | 1.13 | 0.11 | 2  | 19.7 | 4.71E-05 |
| IPI00027255 | Myosin light chain 1 slow-twitch muscle A isoform                                                                                                                 | P14649   |      | 0.85 |      | 0.85 |      | 9  | 46.6 | 1.1E-134 |
| IPI00027269 | Casitas B-lineage lymphoma proto-oncogene                                                                                                                         | P22681   | 1.15 | 1.17 | 0.84 | 1.05 | 0.18 | 10 | 14.6 | 1.56E-22 |
| IPI00027270 | 60S ribosomal protein L26                                                                                                                                         | P61254   | 0.91 | 0.94 | 0.93 | 0.93 | 0.02 | 16 | 55.9 | 4.18E-51 |
| IPI00027280 | DNA topoisomerase 2-beta                                                                                                                                          | Q02880-1 | 1.15 | 1.12 | 1.16 | 1.14 | 0.02 | 19 | 14.5 | 1.3E-303 |
| IPI00027342 | Adenylyl cyclase-associated protein 2                                                                                                                             | P40123   | 0.88 | 1.12 | 1.03 | 1.01 | 0.12 | 9  | 26.4 | 2.59E-83 |
| IPI00027350 | Natural killer cell-enhancing factor B                                                                                                                            | P32119   | 1.27 | 1.15 | 1.19 | 1.21 | 0.06 | 7  | 33.8 | 2.4E-106 |
| IPI00027415 | DEAH box protein 36                                                                                                                                               | Q9H2U1-1 | 0.90 | 1.05 | 0.96 | 0.97 | 0.08 | 10 | 12.8 | 2.4E-139 |
| IPI00027434 | Rho cDNA clone 9                                                                                                                                                  | P08134   | 0.86 | 1.16 | 1.09 | 1.04 | 0.16 | 12 | 49.2 | 1.9E-211 |
| IPI00027438 | Flotillin-1                                                                                                                                                       | O75955   | 1.19 | 0.99 | 1.19 | 1.12 | 0.12 | 3  | 9.1  | 1.46E-42 |
| IPI00027442 | Alanine--tRNA ligase                                                                                                                                              | P49588   | 0.83 | 1.05 | 1.10 | 0.99 | 0.15 | 27 | 33.9 | 0        |
| IPI00027443 | cDNA FLJ54534, highly similar to Homo sapiens cysteinyl-tRNA synthetase (CARS), transcript variant 3, mRNA                                                        | B4DPV7   | 0.98 | 0.92 | 0.94 | 0.95 | 0.03 | 15 | 23.3 | 8.43E-69 |
| IPI00027444 | Leukocyte elastase inhibitor                                                                                                                                      | P30740   | 1.43 | 1.44 | 1.40 | 1.42 | 0.02 | 6  | 24.5 | 3.31E-62 |
| IPI00027445 | Histidine--tRNA ligase                                                                                                                                            | P49590   |      |      | 1.17 | 1.17 |      | 9  | 17.8 | 7.28E-28 |
| IPI00027448 | ATP synthase subunit g, mitochondrial                                                                                                                             | O75964   | 1.01 | 0.92 | 0.88 | 0.94 | 0.07 | 5  | 47.6 | 1.79E-38 |

|             |                                                                                                               |          |       |      |      |       |      |    |      |          |
|-------------|---------------------------------------------------------------------------------------------------------------|----------|-------|------|------|-------|------|----|------|----------|
| IPI00027462 | Calgranulin-B                                                                                                 | P06702   | 10.60 |      |      | 10.60 |      | 2  | 24.6 | 0.000148 |
| IPI00027463 | Calcyclin                                                                                                     | P06703   | 1.46  |      |      | 1.46  |      | 4  | 32.2 | 1.44E-07 |
| IPI00027505 | Integrin alpha-V                                                                                              | P06756-1 | 0.99  | 0.76 | 0.87 | 0.88  | 0.11 | 5  | 8.5  | 1.1E-195 |
| IPI00027569 | Heterogeneous nuclear ribonucleoprotein C-like 1                                                              | O60812   | 1.00  |      |      | 1.00  |      | 12 | 22.9 | 8.4E-136 |
| IPI00027626 | Acute morphine dependence-related protein 2                                                                   | P40227   | 0.85  | 0.98 | 0.94 | 0.92  | 0.07 | 26 | 52.2 | 0        |
| IPI00027681 | Nicotinamide N-methyltransferase                                                                              | P40261   | 0.87  | 1.08 | 1.00 | 0.98  | 0.11 | 10 | 47   | 0        |
| IPI00027693 | Nuclear body protein SP140-like protein                                                                       | Q9H930-1 |       | 0.55 | 0.55 | 0.55  | 0.00 | 4  | 5    | 1.16E-06 |
| IPI00027704 | DNA primase 49 kDa subunit                                                                                    | P49642   | 0.92  | 0.98 | 0.91 | 0.94  | 0.04 | 5  | 15   | 2.06E-46 |
| IPI00027705 | DNA primase 58 kDa subunit                                                                                    | P49643-1 | 0.76  | 1.09 | 0.83 | 0.89  | 0.17 | 6  | 15.7 | 6.68E-29 |
| IPI00027713 | Cyclic AMP-responsive element-binding protein 1                                                               | P16220-1 | 1.43  |      |      | 1.43  |      | 3  | 8.8  | 7.27E-42 |
| IPI00027717 | Component of gems 4                                                                                           | P57678   |       | 0.97 | 1.07 | 1.02  | 0.07 | 8  | 7.1  | 4.2E-12  |
| IPI00027718 | DWF-1                                                                                                         | P57679   |       |      | 1.07 | 1.07  |      | 1  | 1.6  | 0.009227 |
| IPI00027745 | Beta-G1                                                                                                       | P08236-1 |       | 1.08 |      | 1.08  |      | 2  | 2.8  | 0.028168 |
| IPI00027808 | DNA-directed RNA polymerase II 140 kDa polypeptide                                                            | P30876   | 0.85  | 1.08 | 1.04 | 0.99  | 0.12 | 24 | 24.4 | 3.66E-98 |
| IPI00027831 | Glutamate-rich WD repeat-containing protein 1                                                                 | Q9BQ67   | 0.90  | 0.83 | 0.87 | 0.87  | 0.04 | 7  | 23.1 | 8.59E-91 |
| IPI00027834 | Heterogeneous nuclear ribonucleoprotein L                                                                     | P14866   | 0.99  | 1.06 | 1.03 | 1.03  | 0.04 | 22 | 52.3 | 0        |
| IPI00027838 | RNA-binding motif protein 30                                                                                  | Q9BQ04   | 1.09  |      |      | 1.09  |      | 10 | 28.4 | 1.1E-122 |
| IPI00027851 | cDNA FLJ53927, highly similar to Beta-hexosaminidase alpha chain (EC 3.2.1.52)                                | B4DVA7   | 1.28  |      |      | 1.28  |      | 3  | 8.1  | 6.67E-08 |
| IPI00027898 | Uncharacterized protein C21orf70                                                                              | Q9NSI2-1 | 0.67  | 0.89 | 0.78 | 0.78  | 0.11 | 4  | 32.2 | 1.74E-41 |
| IPI00027996 | 70 kDa WD repeat tumor rejection antigen homolog                                                              | P57737-1 | 1.05  |      | 1.26 | 1.16  | 0.14 | 3  | 8.8  | 2.39E-05 |
| IPI00028004 | Proteasome chain 13                                                                                           | P49720   | 1.21  | 1.07 | 1.11 | 1.13  | 0.07 | 8  | 33.2 | 6.8E-138 |
| IPI00028005 | 107 kDa nucleoporin                                                                                           | P57740   | 0.87  | 1.10 | 1.02 | 1.00  | 0.12 | 11 | 17.1 | 1.9E-178 |
| IPI00028006 | Macropain subunit C7-l                                                                                        | P49721   | 0.91  | 1.01 | 1.03 | 0.99  | 0.06 | 10 | 45.3 | 8.6E-146 |
| IPI00028031 | cDNA FLJ56425, highly similar to Very-long-chain specific acyl-CoA dehydrogenase, mitochondrial (EC 1.3.99.-) | B4DEA8   | 0.86  | 1.04 | 1.14 | 1.01  | 0.14 | 22 | 39.4 | 0        |
| IPI00028055 | 21 kDa transmembrane-trafficking protein                                                                      | P49755   | 0.98  | 1.12 | 1.31 | 1.14  | 0.16 | 10 | 38.4 | 2.2E-157 |
| IPI00028059 | Protein numb homolog                                                                                          | P49757-1 |       |      | 1.11 | 1.11  |      | 2  | 3.8  | 2.8E-06  |
| IPI00028065 | Cytoplasmic protein NCK1                                                                                      | P16333   |       | 0.95 | 1.23 | 1.09  | 0.20 | 3  | 8.5  | 0.000222 |

|             |                                                                               |          |      |      |      |      |      |    |      |          |
|-------------|-------------------------------------------------------------------------------|----------|------|------|------|------|------|----|------|----------|
| IPI00028083 | eIF-2B GDP-GTP exchange factor subunit beta                                   | P49770   | 0.76 | 1.06 | 1.00 | 0.94 | 0.16 | 5  | 19.4 | 1.24E-98 |
| IPI00028091 | Actin-like protein 3                                                          | P61158   | 0.92 | 1.13 | 1.10 | 1.05 | 0.11 | 21 | 60.5 | 0        |
| IPI00028099 | Choroideraemia protein                                                        | P24386   | 1.09 | 1.00 | 1.08 | 1.06 | 0.05 | 6  | 12.7 | 1.7E-28  |
| IPI00028122 | CLL-associated antigen KW-7                                                   | O75475-1 | 1.62 | 1.28 | 1.35 | 1.41 | 0.18 | 19 | 39.1 | 0        |
| IPI00028160 | Hydroxymethylbilane synthase                                                  | P08397-1 | 1.08 | 0.82 | 1.02 | 0.97 | 0.13 | 2  | 11.1 | 2.1E-237 |
| IPI00028264 | Exocyst complex 84 kDa subunit                                                | Q8IYI6   |      | 0.96 | 0.60 | 0.78 | 0.25 | 3  | 7.6  | 3.19E-33 |
| IPI00028279 | Testis-specific Y-encoded-like protein 5                                      | Q86VY4   | 1.22 |      | 0.93 | 1.08 | 0.20 | 3  | 8.9  | 6.39E-18 |
| IPI00028357 | Exportin-4                                                                    | Q9C0E2   |      | 0.75 | 0.75 | 0.75 | 0.00 | 3  | 3.2  | 6.11E-22 |
| IPI00028366 | Histone H3-K4 methyltransferase SETD7                                         | Q8WTS6   | 0.92 | 0.59 | 0.97 | 0.82 | 0.21 | 3  | 8.7  | 1.93E-25 |
| IPI00028376 | Deafness dystonia protein 1                                                   | O60220   | 0.85 | 0.82 | 0.85 | 0.84 | 0.02 | 3  | 34   | 9.09E-17 |
| IPI00028387 | DDRGK domain-containing protein 1                                             | Q96HY6-1 |      | 1.04 | 1.04 | 1.04 | 0.00 | 6  | 33.8 | 1.47E-64 |
| IPI00028390 | 39S ribosomal protein L34, mitochondrial                                      | Q9BQ48   | 0.99 |      | 0.70 | 0.85 | 0.20 | 2  | 23.9 | 1.71E-05 |
| IPI00028412 | Autoantigen p27                                                               | O60232   | 0.77 | 0.92 | 0.85 | 0.85 | 0.07 | 8  | 63.3 | 7E-217   |
| IPI00028419 | Adenovirus E1B19K-binding protein B5                                          | O60238   | 1.49 | 1.53 |      | 1.51 | 0.03 | 3  | 16.1 | 3.32E-35 |
| IPI00028481 | Oncogene c-mel                                                                | P61006   | 1.00 | 1.17 | 1.09 | 1.08 | 0.08 | 11 | 48.3 | 1.1E-293 |
| IPI00028520 | Complex I-51kD                                                                | P49821-1 | 0.91 | 0.94 | 0.97 | 0.94 | 0.03 | 11 | 33.6 | 3.3E-143 |
| IPI00028564 | GTP-binding protein 1                                                         | P32455   | 0.73 | 1.07 | 1.20 | 1.00 | 0.24 | 19 | 27.2 | 1.2E-100 |
| IPI00028635 | Dolichyl-diphosphooligosaccharide--protein glycosyltransferase 63 kDa subunit | P04844   | 1.00 | 0.96 | 1.13 | 1.03 | 0.09 | 14 | 36   | 0        |
| IPI00028883 | Complex I-ASHI                                                                | O95169   | 1.41 | 1.08 | 1.04 | 1.18 | 0.20 | 3  | 23.7 | 1.61E-07 |
| IPI00028888 | AU-rich element RNA-binding protein 1                                         | Q14103-1 | 1.14 | 1.02 | 1.02 | 1.06 | 0.07 | 23 | 46.2 | 0        |
| IPI00028911 | Alpha-dystroglycan                                                            | Q14118   | 1.38 |      |      | 1.38 |      | 1  | 1.2  | 2.42E-05 |
| IPI00028912 | Putative transcription factor DB1                                             | Q14119   |      | 0.97 |      | 0.97 |      | 1  | 2.7  | 3.34E-08 |
| IPI00028955 | Block of proliferation 1 protein                                              | Q14137   | 0.79 | 0.84 | 0.70 | 0.78 | 0.07 | 14 | 26.1 | 3.3E-129 |
| IPI00028957 | Ubiquitin conjugation factor E4 A                                             | Q14139-2 | 0.84 | 1.19 | 1.13 | 1.05 | 0.19 | 5  | 6.4  | 2.49E-82 |
| IPI00028980 | Unhealthy ribosome biogenesis protein 2 homolog                               | Q14146   |      | 0.34 |      | 0.34 |      | 2  | 1.8  | 0.000391 |
| IPI00029002 | SFT2 domain-containing protein 2                                              | O95562   | 1.08 | 1.40 |      | 1.24 | 0.23 | 2  | 6.9  | 0.000293 |
| IPI00029012 | eIF3 p167                                                                     | Q14152   | 0.95 | 0.88 | 0.94 | 0.92 | 0.04 | 47 | 32.8 | 0        |
| IPI00029015 | 3-dehydrosphinganine reductase                                                | Q06136   |      | 1.37 |      | 1.37 |      | 2  | 8.1  | 0.000214 |
| IPI00029046 | Malectin                                                                      | Q14165   | 1.11 | 1.05 | 1.22 | 1.13 | 0.09 | 10 | 31.8 | 0        |

|             |                                                                                                    |          |      |      |      |      |      |    |      |          |
|-------------|----------------------------------------------------------------------------------------------------|----------|------|------|------|------|------|----|------|----------|
| IPI00029048 | Tubulin--tyrosine ligase-like protein 12                                                           | Q14166   | 0.88 | 0.99 | 0.79 | 0.88 | 0.10 | 11 | 25   | 2.38E-72 |
| IPI00029054 | Cytosolic 5-nucleotidase II                                                                        | P49902   |      | 1.06 |      | 1.06 |      | 2  | 8.2  | 3.76E-08 |
| IPI00029056 | Selenide, water dikinase 1                                                                         | P49903   |      | 0.80 |      | 0.80 |      | 4  | 18.1 | 1.51E-83 |
| IPI00029079 | Glutamine amidotransferase                                                                         | P49915   | 0.90 | 0.97 | 0.93 | 0.93 | 0.04 | 33 | 58.3 | 0        |
| IPI00029081 | DNA ligase 3                                                                                       | P49916-1 | 0.92 | 0.97 | 0.87 | 0.92 | 0.05 | 10 | 12.2 | 1.31E-43 |
| IPI00029091 | Putative nucleoside diphosphate kinase                                                             | O60361   | 0.84 | 1.03 |      | 0.94 | 0.13 | 6  | 40.9 | 6.5E-136 |
| IPI00029111 | Collapsin response mediator protein 4 long variant                                                 | B3SXQ8   | 1.33 | 1.27 | 1.28 | 1.30 | 0.03 | 32 | 52   | 0        |
| IPI00029133 | ATP synthase subunit b, mitochondrial                                                              | P24539   | 1.04 | 0.93 | 1.05 | 1.01 | 0.07 | 12 | 35.5 | 8.3E-281 |
| IPI00029144 | PP2A subunit B isoform PR72/PR130                                                                  | Q06190-1 | 1.52 |      |      | 1.52 |      | 2  | 1.7  | 0.001679 |
| IPI00029159 | cDNA FLJ38069 fis, clone CTONG2015434, highly similar to DOUBLE-STRAND BREAK REPAIR PROTEIN MRE11A | B3KTC7   | 0.94 | 1.23 | 1.19 | 1.12 | 0.15 | 6  | 10.1 | 1.71E-81 |
| IPI00029264 | Complex III subunit 4                                                                              | P08574   | 1.17 | 0.73 | 1.02 | 0.97 | 0.22 | 6  | 25.8 | 1.19E-34 |
| IPI00029266 | Sm protein E                                                                                       | P62304   | 0.94 | 1.03 | 0.99 | 0.99 | 0.05 | 3  | 29.3 | 4.49E-64 |
| IPI00029267 | U2 small nuclear ribonucleoprotein B                                                               | P08579   | 1.09 | 1.07 | 1.11 | 1.09 | 0.02 | 6  | 32   | 1.54E-94 |
| IPI00029275 | Melanoma-associated antigen p97                                                                    | P08582-1 | 1.12 | 1.13 | 1.33 | 1.19 | 0.12 | 5  | 9.2  | 3.73E-24 |
| IPI00029400 | Zinc finger protein 265                                                                            | O95218-1 | 1.17 | 0.48 | 0.81 | 0.82 | 0.35 | 6  | 19.1 | 1.41E-18 |
| IPI00029403 | Sorting nexin-4                                                                                    | O95219   | 0.91 | 1.19 | 1.20 | 1.10 | 0.17 | 5  | 14.2 | 2.3E-205 |
| IPI00029422 | GG10_2                                                                                             | O95235   | 0.91 | 1.22 | 1.32 | 1.15 | 0.21 | 9  | 13.8 | 2.1E-161 |
| IPI00029444 | UPF0160 protein MYG1, mitochondrial                                                                | Q9HB07   | 0.98 | 1.02 | 0.95 | 0.99 | 0.04 | 9  | 30.9 | 5.48E-71 |
| IPI00029447 | 28 kDa cis-Golgi SNARE p28                                                                         | O95249   | 0.85 | 0.69 | 1.02 | 0.85 | 0.16 | 3  | 14.4 | 3.49E-07 |
| IPI00029468 | Actin-RPV                                                                                          | P61163   | 1.18 | 1.08 | 0.96 | 1.08 | 0.11 | 10 | 36.4 | 2.1E-216 |
| IPI00029473 | Protein Njmu-R1                                                                                    | Q9HAS0   | 0.88 |      |      | 0.88 |      | 2  | 6.3  | 2.74E-30 |
| IPI00029513 | Nucleolar protein 10                                                                               | Q9BSC4-1 |      | 0.90 | 0.87 | 0.88 | 0.02 | 8  | 11.9 | 1.23E-13 |
| IPI00029534 | Amidophosphoribosyltransferase                                                                     | Q06203   | 0.74 | 0.88 | 0.83 | 0.81 | 0.07 | 6  | 19.1 | 5.6E-120 |
| IPI00029557 | GrpE protein homolog 1, mitochondrial                                                              | Q9HAV7   | 0.81 | 0.78 | 0.85 | 0.81 | 0.03 | 11 | 59.9 | 7.4E-188 |
| IPI00029558 | Complex I-B14.5b                                                                                   | O95298   | 0.72 | 0.97 |      | 0.84 | 0.18 | 2  | 16.8 | 3.25E-05 |
| IPI00029601 | Amplaxin                                                                                           | Q14247   | 1.16 | 1.03 | 1.02 | 1.07 | 0.08 | 25 | 50.2 | 1.8E-295 |
| IPI00029605 | Chondroitinsulfatase                                                                               | P34059   | 1.34 |      | 1.56 | 1.45 | 0.16 | 1  | 2.9  | 7.62E-07 |
| IPI00029623 | 27 kDa prosomal protein                                                                            | P60900   | 0.87 | 1.06 | 1.03 | 0.99 | 0.10 | 15 | 59.3 | 1.5E-211 |
| IPI00029629 | E3 ubiquitin/ISG15 ligase TRIM25                                                                   | Q14258   | 1.02 | 1.32 | 1.15 | 1.16 | 0.15 | 13 | 22.4 | 9E-200   |



|             |                                                                                                       |          |      |      |      |      |      |    |      |          |
|-------------|-------------------------------------------------------------------------------------------------------|----------|------|------|------|------|------|----|------|----------|
| IPI00029631 | Enhancer of rudimentary homolog                                                                       | P84090   | 1.02 | 1.10 | 1.01 | 1.04 | 0.05 | 6  | 40.4 | 1.1E-164 |
| IPI00029643 | Human cervical cancer suppressor gene 4 protein                                                       | Q9NYL2-2 | 0.72 | 1.11 | 0.92 | 0.92 | 0.19 | 9  | 27.9 | 1.6E-204 |
| IPI00029656 | Inversely correlated with estrogen receptor expression 1                                              | O60443-1 |      |      | 1.51 | 1.51 |      | 2  | 8.3  | 4.93E-19 |
| IPI00029665 | Cob(II)alamin adenosyltransferase                                                                     | Q96EY8   | 1.53 | 1.44 | 1.42 | 1.46 | 0.06 | 3  | 14.4 | 7.36E-09 |
| IPI00029697 | Autoantigen PM/Scl 1                                                                                  | Q06265-2 | 0.92 | 1.13 | 1.04 | 1.03 | 0.11 | 4  | 11   | 3.76E-51 |
| IPI00029723 | Follistatin-like protein 1                                                                            | Q12841   | 1.15 | 1.08 | 1.20 | 1.14 | 0.06 | 10 | 39.3 | 1.7E-162 |
| IPI00029728 | Basic transcription factor 2 80 kDa subunit                                                           | P18074   |      |      | 0.31 | 0.31 |      | 2  | 4.6  | 0.002019 |
| IPI00029730 | Renal carcinoma antigen NY-REN-31                                                                     | Q12846   | 1.25 | 1.19 | 1.22 | 1.22 | 0.03 | 4  | 16.2 | 1.5E-28  |
| IPI00029731 | 60S ribosomal protein L35a                                                                            | P18077   | 0.80 | 0.86 | 0.84 | 0.84 | 0.03 | 8  | 40   | 2.07E-82 |
| IPI00029733 | 20-alpha-hydroxysteroid dehydrogenase                                                                 | Q04828   | 0.64 | 1.58 | 1.76 | 1.33 | 0.60 | 14 | 49.5 | 7.2E-189 |
| IPI00029737 | Long-chain acyl-CoA synthetase 4                                                                      | O60488-1 | 1.21 | 1.35 | 1.25 | 1.27 | 0.07 | 17 | 28.8 | 1.5E-154 |
| IPI00029744 | PWP1-interacting protein 17                                                                           | Q04837   | 0.89 | 0.93 | 1.04 | 0.95 | 0.08 | 7  | 51.4 | 3.9E-251 |
| IPI00029764 | SF3a60                                                                                                | Q12874   | 0.91 | 1.08 | 1.10 | 1.03 | 0.11 | 14 | 30.1 | 0        |
| IPI00029997 | 6-phosphogluconolactonase                                                                             | O95336   | 1.05 | 1.05 | 1.05 | 1.05 | 0.00 | 14 | 66.7 | 1.4E-301 |
| IPI00030098 | Protein FAM50A                                                                                        | Q14320   | 1.13 | 1.12 | 0.92 | 1.06 | 0.12 | 9  | 27.7 | 4.72E-59 |
| IPI00030116 | cDNA FLJ13370 fis, clone PLACE1000653, highly similar to Phosphoacetylglucosamine mutase (EC 5.4.2.3) | B3KN28   | 0.90 | 1.07 | 1.07 | 1.02 | 0.10 | 11 | 20.7 | 2.7E-161 |
| IPI00030131 | Lamina-associated polypeptide 2, isoforms beta/gamma                                                  | P42167-1 | 1.56 | 1.13 | 1.09 | 1.26 | 0.26 | 19 | 56.2 | 0        |
| IPI00030182 | Guanidinoacetate N-methyltransferase                                                                  | Q14353   | 1.18 | 1.00 | 1.07 | 1.08 | 0.09 | 4  | 27.5 | 2.34E-31 |
| IPI00030207 | GDP-D-mannose dehydratase                                                                             | O60547   |      | 1.13 |      | 1.13 |      | 2  | 7.8  | 1.18E-16 |
| IPI00030255 | Lysyl hydroxylase 3                                                                                   | O60568   | 1.10 | 1.10 | 1.16 | 1.12 | 0.04 | 14 | 23   | 2.9E-253 |
| IPI00030275 | Heat shock protein 75 kDa, mitochondrial                                                              | Q12931   | 0.88 | 0.81 | 0.88 | 0.86 | 0.04 | 25 | 39.5 | 0        |
| IPI00030320 | ATP-dependent RNA helicase p54                                                                        | P26196   | 1.10 | 1.18 | 1.10 | 1.13 | 0.05 | 14 | 33.7 | 5E-286   |
| IPI00030328 | Serine racemase                                                                                       | Q9GZT4   | 0.97 |      |      | 0.97 |      | 3  | 14.1 | 5.69E-33 |
| IPI00030355 | Hemochromatosis candidate gene V protein                                                              | O60927   | 1.03 |      |      | 1.03 |      | 3  | 40.5 | 2.69E-39 |
| IPI00030362 | Differentiation-dependent protein A4                                                                  | Q04941   | 2.74 |      |      | 2.74 |      | 2  | 18.4 | 2.71E-41 |
| IPI00030363 | Acetoacetyl-CoA thiolase                                                                              | P24752   | 0.92 | 1.00 | 0.98 | 0.97 | 0.04 | 22 | 53.9 | 0        |
| IPI00030364 | STAF28                                                                                                | Q12962   | 1.39 | 1.12 | 0.94 | 1.15 | 0.23 | 2  | 15.6 | 1.8E-218 |
| IPI00030371 | RING finger protein 87                                                                                | Q9C037-1 | 0.96 |      |      | 0.96 |      | 2  | 4.8  | 0.001187 |

|             |                                                                |          |      |      |      |      |      |    |      |          |
|-------------|----------------------------------------------------------------|----------|------|------|------|------|------|----|------|----------|
| IPI00030380 | Basic transcription factor 2 62 kDa subunit                    | P32780   |      | 0.79 |      | 0.79 |      | 2  | 10.4 | 0.000647 |
| IPI00030383 | Activator of RNA decay                                         | Q12972-1 | 1.32 | 1.18 | 1.08 | 1.19 | 0.12 | 4  | 17.4 | 8.09E-33 |
| IPI00030389 | Active breakpoint cluster region-related protein               | Q12979-1 |      | 1.15 | 1.10 | 1.13 | 0.04 | 5  | 8.1  | 2.12E-82 |
| IPI00030397 | BCL2/adenovirus E1B 19 kDa protein-interacting protein 1       | Q12981-1 |      | 1.03 | 0.93 | 0.98 | 0.06 | 6  | 25.8 | 1.44E-26 |
| IPI00030481 | Mediator complex subunit 10                                    | Q9BTT4   | 1.10 |      |      | 1.10 |      | 2  | 21.5 | 0.003314 |
| IPI00030654 | Cleavage and polyadenylation specificity factor 68 kDa subunit | Q16630-2 | 1.16 | 1.09 | 1.02 | 1.09 | 0.07 | 10 | 21.1 | 7.5E-233 |
| IPI00030702 | Isocitrate dehydrogenase [NAD] subunit alpha, mitochondrial    | P50213-1 | 0.74 | 0.92 | 0.99 | 0.88 | 0.13 | 8  | 26.8 | 1.52E-94 |
| IPI00030706 | Activator of 90 kDa heat shock protein ATPase homolog 1        | O95433   | 0.90 | 1.09 | 0.96 | 0.98 | 0.10 | 10 | 33.4 | 1E-123   |
| IPI00030770 | Chromosome 21 leucine-rich protein                             | O95456-1 | 0.73 | 1.01 | 0.90 | 0.88 | 0.14 | 7  | 23.6 | 2.38E-85 |
| IPI00030781 | Signal transducer and activator of transcription 1-alpha/beta  | P42224-1 | 1.03 | 1.26 | 1.26 | 1.18 | 0.13 | 18 | 28.8 | 1.3E-119 |
| IPI00030783 | Signal transducer and activator of transcription 5A            | P42229   | 0.86 |      | 0.86 | 0.86 | 0.00 | 2  | 3.7  | 2.41E-49 |
| IPI00030820 | 39S ribosomal protein L47, mitochondrial                       | Q9HD33-1 | 0.97 | 0.83 | 0.93 | 0.91 | 0.07 | 4  | 16.8 | 9.43E-40 |
| IPI00030851 | Protein transport protein Sec24B                               | O95487-1 | 0.91 | 0.99 | 0.98 | 0.96 | 0.05 | 6  | 7.4  | 3.6E-191 |
| IPI00030877 | 15 kDa selenoprotein                                           | O60613-1 | 0.58 | 0.55 | 0.55 | 0.56 | 0.02 | 3  | 24.8 | 1.32E-48 |
| IPI00030915 | Deubiquitinating enzyme 8                                      | P40818   |      | 1.23 | 0.92 | 1.07 | 0.22 | 9  | 10.7 | 2.23E-23 |
| IPI00030920 | GDP-mannose pyrophosphorylase B                                | Q9Y5P6-1 |      |      | 1.08 | 1.08 |      | 11 | 36.4 | 2E-166   |
| IPI00030968 | Uncharacterized protein C9orf142                               | Q9BUH6-1 | 1.27 | 1.04 | 0.95 | 1.09 | 0.16 | 3  | 19.6 | 1.18E-35 |
| IPI00030985 | Protein FAM96A                                                 | Q9H5X1   |      |      | 1.14 | 1.14 |      | 3  | 21.2 | 2.71E-30 |
| IPI00031000 | Vitamin K epoxide reductase complex subunit 1                  | Q9BQB6-1 |      | 1.00 | 1.14 | 1.07 | 0.10 | 1  | 8    | 2.58E-25 |
| IPI00031023 | Protein flightless-1 homolog                                   | Q13045   | 0.97 | 1.12 | 1.05 | 1.05 | 0.08 | 23 | 25.9 | 0        |
| IPI00031064 | Transmembrane protein 126A                                     | Q9H061   | 0.87 | 0.93 | 0.94 | 0.92 | 0.04 | 8  | 23.1 | 1.31E-55 |
| IPI00031109 | B17.2-like                                                     | Q8N183   | 1.23 | 0.78 | 0.82 | 0.94 | 0.25 | 11 | 63.3 | 1.4E-85  |
| IPI00031115 | Golgin subfamily A member 1                                    | Q92805   | 1.12 |      |      | 1.12 |      | 2  | 2.7  | 5.89E-05 |
| IPI00031118 | Alkylated DNA repair protein alkB homolog 7                    | Q9BT30   |      | 1.18 | 1.14 | 1.16 | 0.03 | 2  | 20.8 | 1.84E-48 |
| IPI00031127 | Protein YIPF4                                                  | Q9BSR8   |      | 0.92 | 1.16 | 1.04 | 0.17 | 2  | 7.4  | 0.002898 |
| IPI00031131 | Adipocyte plasma membrane-associated protein                   | Q9HDC9-1 | 0.98 | 1.10 | 1.22 | 1.10 | 0.12 | 16 | 45.2 | 1.9E-121 |
| IPI00031138 | Protease-associated domain-containing protein of 21 kDa        | Q9BSG0   |      | 1.03 |      | 1.03 |      | 1  | 6.4  | 8.13E-06 |

|             |                                                                      |          |      |      |      |      |      |    |      |          |
|-------------|----------------------------------------------------------------------|----------|------|------|------|------|------|----|------|----------|
| IPI00031169 | Ras-related protein Rab-2A                                           | P61019   | 0.97 | 1.02 | 1.12 | 1.04 | 0.08 | 12 | 64.6 | 1.3E-302 |
| IPI00031242 | Protein transport protein Sec16A                                     | O15027-5 | 1.12 |      |      | 1.12 |      | 4  | 4.5  | 5.46E-14 |
| IPI00031357 | Protoporphyrinogen oxidase                                           | P50336   | 1.13 |      |      | 1.13 |      | 2  | 7.8  | 1.57E-11 |
| IPI00031370 | Tubulin beta-2B chain                                                | Q9BVA1   | 1.13 |      | 1.09 | 1.11 | 0.03 | 30 | 76.4 | 0        |
| IPI00031397 | Long-chain acyl-CoA synthetase 3                                     | O95573   | 1.53 | 1.31 | 1.36 | 1.40 | 0.12 | 21 | 35.3 | 3.1E-207 |
| IPI00031420 | UDP-glucose 6-dehydrogenase                                          | O60701   | 1.06 | 1.31 | 1.31 | 1.22 | 0.14 | 25 | 62.1 | 0        |
| IPI00031461 | cDNA FLJ60299, highly similar to Rab GDP dissociation inhibitor beta | B4DLV7   | 1.01 | 1.08 | 1.02 | 1.04 | 0.04 | 25 | 67.3 | 0        |
| IPI00031479 | Protein disulfide isomerase-related protein                          | Q14554   |      | 1.22 | 1.37 | 1.30 | 0.11 | 5  | 10.2 | 7.49E-36 |
| IPI00031508 | ATP-dependent RNA helicase DHX8                                      | Q14562   | 1.15 | 1.38 | 0.90 | 1.15 | 0.24 | 4  | 5.4  | 1.55E-20 |
| IPI00031514 | Activator 1 36 kDa subunit                                           | P40937   |      | 1.24 | 1.01 | 1.13 | 0.16 | 8  | 31.5 | 5.05E-90 |
| IPI00031516 | GA-binding protein subunit beta-1                                    | Q06547-1 |      |      | 1.18 | 1.18 |      | 1  | 2.3  | 0.003971 |
| IPI00031517 | DNA replication licensing factor MCM6                                | Q14566   | 1.09 | 1.21 | 1.17 | 1.16 | 0.06 | 33 | 40.2 | 3E-269   |
| IPI00031519 | CXXC-type zinc finger protein 9                                      | P26358-1 |      | 0.97 | 0.99 | 0.98 | 0.01 | 27 | 19.4 | 9.7E-192 |
| IPI00031521 | Activator 1 38 kDa subunit                                           | P40938   | 0.95 | 1.12 | 1.13 | 1.07 | 0.10 | 10 | 34.6 | 4.1E-208 |
| IPI00031522 | 78 kDa gastrin-binding protein                                       | P40939   | 0.93 | 1.14 | 1.14 | 1.07 | 0.12 | 26 | 41.8 | 0        |
| IPI00031526 | Uncharacterized protein C19orf43                                     | Q9BQ61   | 1.27 | 1.06 | 1.09 | 1.14 | 0.12 | 12 | 49.4 | 1.67E-65 |
| IPI00031527 | Protein MIS12 homolog                                                | Q9H081   |      | 1.17 | 1.47 | 1.32 | 0.21 | 3  | 14.6 | 2.08E-24 |
| IPI00031554 | ATP-dependent RNA helicase DDX50                                     | Q9BQ39   | 1.21 | 0.98 | 1.00 | 1.06 | 0.13 | 5  | 9.6  | 4.88E-76 |
| IPI00031556 | Splicing factor U2AF 65 kDa subunit                                  | P26368-1 | 1.00 | 0.97 | 0.99 | 0.99 | 0.01 | 10 | 34.1 | 3.8E-194 |
| IPI00031558 | Adenosine diphosphoribose pyrophosphatase                            | Q9BW91-1 | 0.94 |      |      | 0.94 |      | 2  | 7.4  | 4.66E-10 |
| IPI00031563 | DET1- and DDB1-associated protein 1                                  | Q9BW61   |      |      | 1.17 | 1.17 |      | 2  | 29.4 | 4.34E-05 |
| IPI00031564 | Cytochrome c-releasing factor 21                                     | O75223-1 | 1.03 | 1.08 | 1.01 | 1.04 | 0.04 | 8  | 37.8 | 9.3E-111 |
| IPI00031566 | Centromere protein M                                                 | Q9NSP4-1 |      | 1.20 |      | 1.20 |      | 3  | 18.3 | 2.62E-14 |
| IPI00031612 | rRNA-processing protein UTP23 homolog                                | Q9BRU9-1 |      |      | 0.88 | 0.88 |      | 1  | 4.4  | 2.36E-21 |
| IPI00031614 | DNA replication complex GINS protein SLD5                            | Q9BRT9-1 | 1.07 | 1.07 | 1.07 | 1.07 | 0.00 | 7  | 39.9 | 1.97E-55 |
| IPI00031615 | Protein LAPS18-like                                                  | Q9BRT6   | 1.07 |      | 0.68 | 0.88 | 0.27 | 2  | 10.9 | 9.76E-24 |
| IPI00031616 | HBV XAg-transactivated protein 4                                     | Q9BRT3   |      | 1.28 |      | 1.28 |      | 1  | 5.3  | 3.95E-05 |
| IPI00031617 | Breast cancer-associated protein SGA-81M                             | Q9BRT2   | 0.97 |      |      | 0.97 |      | 3  | 25.4 | 7.68E-28 |
| IPI00031618 | Protein DDI1 homolog 2                                               | Q5TDH0-3 |      |      | 1.19 | 1.19 |      | 1  | 4.5  | 7.44E-30 |

|             |                                                                 |          |      |      |      |      |      |    |      |          |
|-------------|-----------------------------------------------------------------|----------|------|------|------|------|------|----|------|----------|
| IPI00031622 | Coiled-coil-helix-coiled-coil-helix domain-containing protein 6 | Q9BRQ6   | 1.21 | 1.06 | 0.97 | 1.08 | 0.12 | 10 | 52.8 | 1.3E-135 |
| IPI00031627 | DNA-directed RNA polymerase II subunit A                        | P24928   | 0.82 | 0.99 | 1.24 | 1.02 | 0.21 | 14 | 10.5 | 1.3E-216 |
| IPI00031629 | HTPHLP                                                          | Q9H2J4   | 0.80 | 0.85 | 0.85 | 0.83 | 0.03 | 5  | 25.1 | 2.36E-35 |
| IPI00031647 | Programmed cell death protein 2-like                            | Q9BRP1   |      | 1.06 |      | 1.06 |      | 2  | 7.8  | 0.001583 |
| IPI00031650 | NUDT16-like protein 1                                           | Q9BRJ7-1 | 0.99 | 1.11 | 1.18 | 1.09 | 0.10 | 6  | 33.2 | 3.52E-25 |
| IPI00031651 | Uncharacterized protein C7orf50                                 | Q9BRJ6   | 1.11 | 1.00 | 0.98 | 1.03 | 0.07 | 10 | 48.5 | 3.99E-92 |
| IPI00031655 | Dermal papilla-derived protein 9                                | Q9BRG1   | 0.86 | 1.13 | 1.01 | 1.00 | 0.13 | 5  | 23.9 | 3.25E-67 |
| IPI00031661 | NOC4-like protein                                               | Q9BVI4   | 0.96 | 0.89 | 0.80 | 0.88 | 0.08 | 8  | 26.2 | 2.1E-131 |
| IPI00031670 | Nervous system over-expressed protein 20                        | Q8IWE2   | 1.12 | 1.25 | 1.17 | 1.18 | 0.07 | 14 | 36.8 | 1E-245   |
| IPI00031679 | Uncharacterized protein C3orf26                                 | Q9BQ75   |      | 0.80 | 0.70 | 0.75 | 0.07 | 5  | 17.9 | 2.73E-09 |
| IPI00031680 | Acyl-CoA-binding domain-containing protein 6                    | Q9BR61   | 1.69 | 1.19 |      | 1.44 | 0.35 | 3  | 15.2 | 9.96E-86 |
| IPI00031681 | Cell division protein kinase 2                                  | P24941   | 1.05 | 1.42 | 1.36 | 1.28 | 0.20 | 10 | 42.3 | 7.59E-98 |
| IPI00031691 | 60S ribosomal protein L9                                        | P32969   | 0.81 | 0.95 | 0.89 | 0.88 | 0.07 | 8  | 37   | 1.68E-45 |
| IPI00031697 | Mitsugumin-23                                                   | Q9BVC6   | 1.29 | 1.07 | 1.20 | 1.19 | 0.11 | 6  | 13.2 | 9.6E-66  |
| IPI00031708 | Beta-diketonase                                                 | P16930   | 0.80 | 1.14 | 1.09 | 1.01 | 0.18 | 7  | 20.3 | 2.23E-82 |
| IPI00031768 | Protein Hook homolog 3                                          | Q86VS8   | 0.97 | 1.10 | 1.13 | 1.07 | 0.08 | 10 | 19.5 | 4.6E-138 |
| IPI00031801 | Cold shock domain-containing protein A                          | P16989-1 | 0.87 | 0.73 | 0.73 | 0.78 | 0.08 | 11 | 45.7 | 0        |
| IPI00031812 | CCAAT-binding transcription factor I subunit A                  | P67809   | 1.09 | 0.76 | 0.80 | 0.88 | 0.18 | 20 | 64.2 | 0        |
| IPI00031820 | CML33                                                           | Q9Y285   | 0.96 | 0.89 | 0.91 | 0.92 | 0.03 | 9  | 19.7 | 6.8E-139 |
| IPI00031836 | Developmentally-regulated GTP-binding protein 1                 | Q9Y295   | 0.83 | 0.99 | 0.93 | 0.92 | 0.08 | 17 | 49   | 0        |
| IPI00031960 | A190                                                            | O95602   |      | 0.82 | 0.86 | 0.84 | 0.02 | 3  | 2.6  | 8.8E-19  |
| IPI00032003 | Emerin                                                          | P50402   | 1.24 | 1.05 | 1.04 | 1.11 | 0.11 | 12 | 46.9 | 6.3E-286 |
| IPI00032038 | Carnitine O-palmitoyltransferase 1, liver isoform               | P50416-1 | 0.63 | 0.78 | 0.92 | 0.78 | 0.14 | 5  | 7.4  | 1.84E-48 |
| IPI00032064 | AKAP-KL                                                         | Q9Y2D5-4 | 1.02 | 0.76 | 0.88 | 0.89 | 0.13 | 9  | 12.8 | 9.8E-260 |
| IPI00032134 | Cytoplasmic antiproteinase 2                                    | P50452   | 0.94 | 1.31 | 1.29 | 1.18 | 0.20 | 5  | 14.2 | 3.52E-77 |
| IPI00032140 | 47 kDa heat shock protein                                       | P50454   | 1.11 | 1.00 | 1.16 | 1.09 | 0.08 | 28 | 64.8 | 0        |
| IPI00032206 | LIM protein RIL                                                 | P50479-1 | 0.80 | 1.00 | 0.96 | 0.92 | 0.10 | 10 | 41.2 | 7.92E-81 |
| IPI00032230 | 4.1B                                                            | Q9Y2J2-1 | 0.97 | 1.22 | 1.00 | 1.06 | 0.14 | 11 | 13.7 | 1.29E-45 |
| IPI00032293 | Cystatin-3                                                      | P01034   | 1.16 | 1.72 | 1.35 | 1.41 | 0.28 | 2  | 19.2 | 3E-05    |

|             |                                                   |          |      |      |      |      |      |    |      |          |
|-------------|---------------------------------------------------|----------|------|------|------|------|------|----|------|----------|
| IPI00032304 | Intestine-specific plastin                        | Q14651   |      | 1.05 |      | 1.05 |      | 7  | 11.3 | 7.24E-91 |
| IPI00032314 | L antigen family member 3                         | Q14657   | 1.20 |      | 0.98 | 1.09 | 0.16 | 2  | 27.3 | 8.15E-72 |
| IPI00032342 | TRIP12 protein                                    | Q14CA3   | 0.72 | 0.93 | 0.96 | 0.87 | 0.13 | 9  | 6    | 2.3E-252 |
| IPI00032355 | Pumilio homolog 1 (Drosophila)                    | Q5T1Z8   | 0.78 | 1.12 | 0.94 | 0.95 | 0.17 | 9  | 9.6  | 3.55E-43 |
| IPI00032387 | DNA replication complex GINS protein PSF1         | Q14691   | 1.07 | 1.20 | 1.03 | 1.10 | 0.09 | 4  | 20.9 | 1.2E-113 |
| IPI00032406 | Cell cycle progression restoration gene 3 protein | O60884   | 0.81 | 1.12 | 1.06 | 0.99 | 0.17 | 10 | 25.5 | 3.4E-40  |
| IPI00032423 | ATP-dependent RNA helicase ROK1-like              | Q9Y2R4   | 0.70 | 1.18 | 1.06 | 0.98 | 0.25 | 6  | 18.4 | 6.5E-181 |
| IPI00032459 | Adapter-related protein complex 3 mu-1 subunit    | Q9Y2T2   | 1.03 | 1.23 | 1.50 | 1.25 | 0.24 | 5  | 20.1 | 1.6E-31  |
| IPI00032460 | Protein G7b                                       | Q9Y333   | 0.80 | 1.04 |      | 0.92 | 0.16 | 4  | 40   | 1.78E-90 |
| IPI00032491 | Inner nuclear membrane protein Man1               | Q9Y2U8   |      |      | 0.97 | 0.97 |      | 5  | 8.8  | 1.84E-11 |
| IPI00032498 | Dynactin subunit 5                                | Q9BTE1   |      | 1.17 |      | 1.17 |      | 3  | 15.4 | 5.62E-09 |
| IPI00032533 | WD repeat-containing protein 18                   | Q9BV38   | 0.86 | 1.05 | 1.03 | 0.98 | 0.10 | 6  | 13.4 | 1.1E-12  |
| IPI00032561 | Calcium-binding protein 39                        | Q9Y376   | 0.89 | 0.89 | 0.96 | 0.92 | 0.04 | 16 | 34.9 | 1.8E-285 |
| IPI00032563 | GC-box-binding zinc finger protein 1              | Q9Y2X9   | 0.84 | 0.90 | 0.84 | 0.86 | 0.03 | 4  | 8.9  | 1.38E-46 |
| IPI00032597 | RNA-binding motif protein, X-linked 2             | Q9Y388   | 1.10 |      | 1.06 | 1.08 | 0.03 | 3  | 10.9 | 6.36E-21 |
| IPI00032635 | Protein FAM61B                                    | Q9BX40-1 | 1.24 | 1.03 | 0.83 | 1.03 | 0.20 | 2  | 9.6  | 2.92E-45 |
| IPI00032780 | Intersex-like protein                             | Q9NX70   |      | 0.83 | 1.12 | 0.98 | 0.21 | 3  | 17.6 | 1.9E-149 |
| IPI00032791 | Ribonuclease P protein subunit p29                | O95707   | 1.08 | 1.16 |      | 1.12 | 0.06 | 3  | 15   | 3.4E-101 |
| IPI00032799 | Gastric cancer antigen Zg14                       | Q9Y3A4   | 0.75 |      | 0.77 | 0.76 | 0.01 | 4  | 16   | 1.31E-45 |
| IPI00032808 | Ras-related protein Rab-3D                        | O95716   | 1.26 | 1.27 | 1.18 | 1.24 | 0.05 | 8  | 37   | 4.7E-137 |
| IPI00032823 | 3-5 exoribonuclease CSL4 homolog                  | Q9Y3B2   | 0.89 | 1.02 | 1.03 | 0.98 | 0.07 | 5  | 35.4 | 9.5E-164 |
| IPI00032826 | Hsc70-interacting protein                         | P50502   | 1.08 | 0.90 | 1.01 | 1.00 | 0.09 | 12 | 31.7 | 2.3E-190 |
| IPI00032827 | Pre-mRNA branch site protein p14                  | Q9Y3B4   | 0.91 | 1.20 | 1.09 | 1.07 | 0.15 | 4  | 39.2 | 2.85E-84 |
| IPI00032830 | Oligoribonuclease, mitochondrial                  | Q9Y3B8-1 | 0.80 | 0.96 | 0.94 | 0.90 | 0.09 | 13 | 39.7 | 1.06E-65 |
| IPI00032831 | Soluble 29 kDa NSF attachment protein             | O95721   | 1.16 | 1.09 | 1.09 | 1.11 | 0.04 | 9  | 43   | 6.41E-78 |
| IPI00032848 | Coiled-coil domain-containing protein 53          | Q9Y3C0   |      | 1.29 |      | 1.29 |      | 1  | 7.2  | 3.95E-24 |
| IPI00032849 | HBV pre-S2 trans-regulated protein 3              | Q9Y3C1   | 0.94 | 0.77 | 0.78 | 0.83 | 0.10 | 6  | 38.2 | 6.5E-113 |
| IPI00032851 | Coatomer subunit zeta-1                           | P61923   | 0.96 | 0.86 | 1.07 | 0.96 | 0.10 | 5  | 31.6 | 2.7E-227 |
| IPI00032853 | H/ACA ribonucleoprotein complex subunit 3         | Q9NPE3   | 0.81 | 0.91 | 0.77 | 0.83 | 0.07 | 3  | 62.5 | 5.48E-15 |
| IPI00032872 | 28S ribosomal protein S16, mitochondrial          | Q9Y3D3   |      | 0.78 |      | 0.78 |      | 2  | 22.6 | 1.1E-21  |

|             |                                                                         |          |      |      |      |      |      |    |      |          |
|-------------|-------------------------------------------------------------------------|----------|------|------|------|------|------|----|------|----------|
| IPI00032875 | Electron transfer flavoprotein-ubiquinone oxidoreductase, mitochondrial | Q16134   |      |      | 0.81 | 0.81 |      | 1  | 3.4  | 7.23E-05 |
| IPI00032879 | Adenylate kinase isoenzyme 6                                            | Q9Y3D8   |      | 0.79 | 0.70 | 0.74 | 0.06 | 3  | 19.8 | 7.69E-56 |
| IPI00032881 | 28S ribosomal protein S23, mitochondrial                                | Q9Y3D9   | 0.97 | 0.81 | 0.89 | 0.89 | 0.08 | 8  | 53.7 | 2.3E-111 |
| IPI00032911 | 21 kDa TBP-like protein                                                 | P62380   | 0.97 |      | 1.16 | 1.07 | 0.13 | 2  | 16.1 | 1.09E-72 |
| IPI00032955 | RING finger protein 114                                                 | Q9Y508-1 | 0.78 | 1.08 | 1.00 | 0.95 | 0.15 | 8  | 39.5 | 1E-165   |
| IPI00032959 | Glycerol-3-phosphate dehydrogenase 1-like protein                       | Q8N335   | 1.06 |      | 1.11 | 1.08 | 0.03 | 2  | 5.4  | 5.43E-05 |
| IPI00032966 | Bridging integrator 3                                                   | Q9NQY0-1 |      |      | 1.05 | 1.05 |      | 2  | 8.7  | 2.29E-11 |
| IPI00032970 | Oxysterol-binding protein-related protein 11                            | Q9BXB4   | 1.25 | 1.52 | 1.20 | 1.32 | 0.17 | 5  | 9.1  | 2.51E-25 |
| IPI00032995 | LanC-like protein 2                                                     | Q9NS86   | 0.86 | 1.22 | 1.10 | 1.06 | 0.18 | 7  | 20   | 5.4E-170 |
| IPI00033022 | Dynamin-2                                                               | P50570-1 | 1.14 |      | 1.12 | 1.13 | 0.01 | 19 | 28.9 | 3.8E-243 |
| IPI00033030 | 110 kDa cell membrane glycoprotein                                      | Q16186   | 0.95 | 1.14 | 0.99 | 1.02 | 0.10 | 7  | 15   | 3.24E-72 |
| IPI00033036 | Initiation factor 2-associated 67 kDa glycoprotein                      | P50579   | 0.86 | 1.10 | 0.98 | 0.98 | 0.12 | 22 | 53.3 | 0        |
| IPI00033054 | CTD small phosphatase-like protein 2                                    | Q05D32-1 |      | 1.18 | 1.38 | 1.28 | 0.15 | 4  | 7.9  | 2.66E-44 |
| IPI00033130 | SUMO-activating enzyme subunit 1                                        | Q9UBE0   | 1.03 | 1.06 | 1.13 | 1.07 | 0.05 | 17 | 54.6 | 1.3E-201 |
| IPI00033132 | CKII beta-binding protein 1                                             | Q9UBF6-1 |      |      | 1.19 | 1.19 |      | 2  | 18.6 | 3.45E-58 |
| IPI00033143 | eIF-3 p25                                                               | Q9UBQ5   | 0.85 | 0.90 | 1.00 | 0.91 | 0.08 | 5  | 26.1 | 1.6E-170 |
| IPI00033153 | mRNA export factor TAP                                                  | Q9UBU9   | 0.94 | 1.16 | 1.12 | 1.07 | 0.12 | 10 | 24.7 | 1E-124   |
| IPI00033466 | C-type lectin domain family 11 member A                                 | Q9Y240   |      | 0.90 |      | 0.90 |      | 3  | 13.3 | 4.91E-09 |
| IPI00033516 | Gamma-ring complex protein 104 kDa                                      | Q96CW5-1 | 1.01 | 1.33 |      | 1.17 | 0.23 | 2  | 4.6  | 4.42E-10 |
| IPI00033561 | RNA-binding protein with serine-rich domain 1                           | Q15287-1 | 1.43 | 1.06 | 1.04 | 1.17 | 0.22 | 2  | 10.2 | 7.7E-52  |
| IPI00033600 | Protein phosphatase 1 regulatory subunit 22                             | Q15435-1 | 1.21 | 1.17 | 1.21 | 1.20 | 0.02 | 8  | 30.3 | 2.4E-205 |
| IPI00033892 | GDNF-inducible zinc finger protein 1                                    | Q9H116   |      | 1.25 |      | 1.25 |      | 2  | 1.4  | 0.029171 |
| IPI00034006 | His domain-containing protein tyrosine phosphatase                      | Q9H3S7   | 1.03 | 1.17 | 1.14 | 1.11 | 0.07 | 6  | 5.7  | 4.7E-38  |
| IPI00034049 | ATP-dependent helicase RENT1                                            | Q92900-1 | 0.93 | 1.05 | 1.06 | 1.01 | 0.07 | 36 | 37.2 | 0        |
| IPI00034069 | Dimethyladenosine transferase 2, mitochondrial                          | Q9H5Q4   |      |      | 0.79 | 0.79 |      | 3  | 8.3  | 6.15E-10 |
| IPI00034181 | B5T-overexpressed gene protein                                          | O75884-1 | 1.01 |      |      | 1.01 |      | 2  | 11.3 | 0.004445 |
| IPI00034277 | Probable cation-transporting ATPase 13A1                                | Q9HD20-1 | 0.98 | 0.93 | 0.89 | 0.93 | 0.05 | 3  | 3.5  | 5.68E-07 |
| IPI00034319 | Acetylcholinesterase-associated protein                                 | O60888-2 | 1.24 | 1.17 | 1.03 | 1.15 | 0.11 | 2  | 14.1 | 8.92E-17 |

|             |                                                                |          |      |      |      |      |      |    |      |          |
|-------------|----------------------------------------------------------------|----------|------|------|------|------|------|----|------|----------|
| IPI00035167 | Ribosomal protein L1                                           | A8MXH3   |      |      | 1.36 | 1.36 |      | 6  | 17.1 | 1.07E-16 |
| IPI00036742 | Protein virilizer homolog                                      | Q69YN4-1 |      | 1.10 | 1.25 | 1.17 | 0.11 | 5  | 3.8  | 1.07E-40 |
| IPI00037448 | Glyoxylate reductase/hydroxypyruvate reductase                 | Q9UBQ7   | 0.95 | 1.03 | 0.99 | 0.99 | 0.04 | 14 | 48.2 | 0        |
| IPI00037599 | Alpha-globin transcription factor CP2                          | Q12800-1 | 1.05 | 1.13 | 0.84 | 1.01 | 0.15 | 4  | 11.4 | 1.03E-43 |
| IPI00038378 | 2,3-diketo-5-methylthio-1-phosphopentane phosphatase           | Q9UHY7-1 | 0.97 | 1.12 | 1.07 | 1.05 | 0.08 | 6  | 21.5 | 2.1E-152 |
| IPI00041127 | Anti-silencing function protein 1 homolog B                    | Q9NVP2   | 1.52 | 1.79 | 1.75 | 1.69 | 0.15 | 3  | 28.7 | 7.32E-81 |
| IPI00041325 | H/ACA ribonucleoprotein complex subunit 2                      | Q9NX24   | 0.98 | 0.91 | 0.87 | 0.92 | 0.05 | 7  | 39.2 | 3.3E-289 |
| IPI00042099 | Pygopus homolog 2                                              | Q9BRQ0   | 1.62 |      | 1.33 | 1.47 | 0.20 | 2  | 8.4  | 1.13E-07 |
| IPI00042580 | Apolipoprotein O                                               | Q9BUR5-1 | 0.99 | 1.07 | 1.05 | 1.04 | 0.04 | 5  | 23.7 | 7.55E-33 |
| IPI00043563 | LisH domain-containing protein C16orf63                        | Q96NB1   | 0.79 |      |      | 0.79 |      | 1  | 8.6  | 4.22E-05 |
| IPI00043565 | Coiled-coil domain-containing protein 16                       | Q96NB3   | 1.64 | 1.28 | 1.43 | 1.45 | 0.18 | 4  | 13.4 | 8.19E-69 |
| IPI00043598 | Inhibitor of nuclear factor kappa-B kinase-interacting protein | Q70UQ0-4 | 0.92 | 0.90 | 0.89 | 0.90 | 0.02 | 13 | 38.5 | 7.9E-165 |
| IPI00043622 | FERM domain-containing protein 6                               | Q96NE9-1 |      |      | 1.50 | 1.50 |      | 2  | 5.8  | 4.49E-17 |
| IPI00044761 | Pseudouridylate synthase 7 homolog                             | Q96PZ0   |      | 0.80 | 0.71 | 0.76 | 0.07 | 3  | 7.7  | 6.31E-67 |
| IPI00045051 | Purine-rich element-binding protein B                          | Q96QR8   | 0.93 | 1.19 | 1.06 | 1.06 | 0.13 | 7  | 35.9 | 1.8E-106 |
| IPI00045207 | BTB/POZ domain-containing protein 14B                          | Q96RE7   |      | 1.58 | 1.07 | 1.33 | 0.36 | 2  | 6.1  | 2.44E-08 |
| IPI00045219 | SH3 and PX domain-containing protein 3B                        | Q96RF0-1 | 1.32 | 0.92 | 0.79 | 1.01 | 0.28 | 2  | 4.6  | 5.73E-25 |
| IPI00045496 | Deubiquitinating enzyme 28                                     | Q96RU2-1 | 1.04 | 1.25 |      | 1.15 | 0.15 | 4  | 5.7  | 1.22E-15 |
| IPI00045511 | Chloride channel CLIC-like protein 1                           | Q96S66-1 | 1.16 | 1.23 | 1.05 | 1.14 | 0.09 | 3  | 9.8  | 6.4E-116 |
| IPI00045550 | Neurabin-2                                                     | Q96SB3   | 1.27 | 1.28 | 1.01 | 1.19 | 0.16 | 4  | 9.2  | 1.9E-114 |
| IPI00045839 | Growth suppressor 1                                            | Q32P28-3 |      |      | 1.24 | 1.24 |      | 16 | 26.9 | 1.6E-175 |
| IPI00045914 | Msx2-interacting protein                                       | Q96T58   | 3.40 |      | 0.91 | 2.15 | 1.76 | 2  | 0.9  | 1.94E-15 |
| IPI00045917 | Protein cereblon                                               | Q96SW2-1 | 0.91 |      | 0.82 | 0.87 | 0.06 | 3  | 9.3  | 6.32E-05 |
| IPI00045946 | ATP-dependent metalloprotease FtsH1                            | Q96TA2-1 | 0.72 | 0.99 | 1.05 | 0.92 | 0.18 | 6  | 13.1 | 1.3E-211 |
| IPI00046057 | Syntaxin binding protein 1                                     | P61764-2 |      |      | 1.33 | 1.33 |      | 4  | 7    | 7.7E-11  |
| IPI00046828 | Coiled-coil domain-containing protein 58                       | Q4VC31   | 0.74 | 0.86 | 0.85 | 0.82 | 0.07 | 3  | 25.7 | 8.31E-40 |
| IPI00054042 | Bruton tyrosine kinase-associated protein 135                  | P78347-1 | 1.07 | 1.09 | 1.08 | 1.08 | 0.01 | 31 | 34.4 | 6.4E-138 |
| IPI00055405 | Alkylated DNA repair protein alkB homolog 2                    | Q6NS38   | 0.90 |      |      | 0.90 |      | 1  | 8.8  | 1.59E-94 |

|             |                                                            |          |      |      |      |      |      |    |      |          |
|-------------|------------------------------------------------------------|----------|------|------|------|------|------|----|------|----------|
| IPI00056334 | Cavin-3                                                    | Q969G5   | 1.46 | 1.10 | 1.19 | 1.25 | 0.19 | 11 | 49.8 | 1.1E-100 |
| IPI00056357 | Interleukin-25                                             | Q969H8   | 0.92 | 1.14 | 1.11 | 1.06 | 0.12 | 4  | 23.7 | 5.49E-60 |
| IPI00056496 | Ras-related protein Rab-24                                 | Q969Q5   | 1.00 |      | 1.04 | 1.02 | 0.03 | 2  | 12.3 | 2.08E-14 |
| IPI00056499 | Zinc finger protein 622                                    | Q969S3   | 1.52 | 1.17 | 0.86 | 1.18 | 0.33 | 2  | 6.1  | 9.54E-24 |
| IPI00056505 | Cytosolic 5-nucleotidase III-like protein                  | Q969T7   |      |      | 0.99 | 0.99 |      | 2  | 5.8  | 0.007086 |
| IPI00057097 | Deoxynucleotidyltransferase terminal-interacting protein 1 | Q9H147   | 1.19 |      |      | 1.19 |      | 2  | 8.8  | 7.05E-34 |
| IPI00058192 | GDP-fucose protein O-fucosyltransferase 1                  | Q9H488-1 | 0.98 | 1.00 | 1.21 | 1.06 | 0.13 | 5  | 17.5 | 6.12E-43 |
| IPI00059242 | Synapse-associated protein 1                               | Q96A49   | 0.95 | 0.93 | 0.91 | 0.93 | 0.02 | 13 | 39.2 | 1.2E-278 |
| IPI00059264 | Vacuolar protein sorting-associated protein 26B            | Q4G0F5   | 1.20 | 0.81 |      | 1.00 | 0.28 | 3  | 10.7 | 2.8E-13  |
| IPI00059279 | Exocyst complex component 4                                | Q96A65   | 0.84 | 1.02 | 1.03 | 0.96 | 0.11 | 4  | 6.3  | 4.24E-28 |
| IPI00059292 | Protein mago nashi homolog 2                               | Q96A72   | 1.01 | 1.01 | 0.96 | 0.99 | 0.03 | 8  | 58.8 | 5.83E-98 |
| IPI00059762 | Lysophospholipase-like protein 1                           | Q5VWZ2-1 | 0.83 |      | 1.09 | 0.96 | 0.19 | 3  | 15.2 | 2.39E-07 |
| IPI00059764 | Enzyme-like protein PIT13                                  | Q96B54-1 |      | 1.31 | 1.11 | 1.21 | 0.14 | 2  | 16.5 | 8.21E-42 |
| IPI00060031 | ADP-ribosylation factor-like protein 10B                   | Q96BM9   | 1.35 |      |      | 1.35 |      | 4  | 22.6 | 5.13E-25 |
| IPI00060148 | Coiled-coil domain-containing protein 127                  | Q96BQ5   |      | 0.57 |      | 0.57 |      | 2  | 8.1  | 0.011216 |
| IPI00060181 | EF-hand domain-containing protein D2                       | Q96C19   | 1.20 | 1.07 | 1.06 | 1.11 | 0.08 | 18 | 54.2 | 2.9E-230 |
| IPI00060200 | Aldose 1-epimerase                                         | Q96C23   | 1.35 | 1.28 | 1.25 | 1.29 | 0.05 | 4  | 16.4 | 3.88E-36 |
| IPI00060423 | Collagen triple helix repeat-containing protein 1          | Q96CG8-1 |      | 1.20 | 1.23 | 1.21 | 0.02 | 5  | 23.9 | 2.54E-30 |
| IPI00060521 | FLYWCH family member 2                                     | Q96CP2   | 1.64 | 1.31 | 1.16 | 1.37 | 0.25 | 6  | 66.4 | 9.88E-16 |
| IPI00060545 | Mitochondrial intramembrane cleaving protease PARL         | Q9H300-1 |      | 0.97 | 0.92 | 0.95 | 0.03 | 2  | 8.7  | 4.31E-24 |
| IPI00060569 | 2-arachidonoylglycerol hydrolase                           | Q8N2K0-2 | 1.14 | 1.17 | 1.25 | 1.19 | 0.05 | 3  | 9.2  | 5.24E-45 |
| IPI00060627 | Coiled-coil domain-containing protein 124                  | Q96CT7   | 1.33 | 1.13 | 1.02 | 1.16 | 0.16 | 8  | 33.2 | 1.07E-50 |
| IPI00061108 | Ribosome-recycling factor, mitochondrial                   | Q96E11-1 | 0.84 | 0.73 | 0.81 | 0.79 | 0.05 | 5  | 21.4 | 1.45E-39 |
| IPI00061111 | BLM-associated protein of 18 kDa                           | Q96E14-1 | 1.65 | 1.54 | 1.61 | 1.60 | 0.06 | 2  | 16.3 | 0.000134 |
| IPI00061168 | Ankyrin repeat domain-containing protein 40                | Q6AI12   | 1.00 |      |      | 1.00 |      | 2  | 9.2  | 1.19E-34 |
| IPI00061245 | 28S ribosomal protein S10, mitochondrial                   | P82664   | 1.00 |      |      | 1.00 |      | 1  | 6    | 0.000122 |
| IPI00061356 | Arsenite-related gene 1 protein                            | Q96EA4-1 |      |      | 1.00 | 1.00 |      | 2  | 5    | 0.000318 |
| IPI00061492 | Uncharacterized protein C7orf30                            | Q96EH3   | 1.05 | 0.79 | 0.92 | 0.92 | 0.13 | 1  | 9    | 1.19E-19 |
| IPI00061525 | Glucosamine 6-phosphate N-acetyltransferase                | Q96EK6   | 0.78 | 0.99 | 0.92 | 0.90 | 0.11 | 6  | 39.7 | 2.6E-150 |



|             |                                                                        |          |      |      |      |      |      |    |      |          |
|-------------|------------------------------------------------------------------------|----------|------|------|------|------|------|----|------|----------|
| IPI00061528 | Protein KTI12 homolog                                                  | Q96EK9   |      | 1.06 | 1.06 | 1.06 | 0.00 | 3  | 12.4 | 1.26E-73 |
| IPI00061531 | 39S ribosomal protein L53, mitochondrial                               | Q96EL3   | 0.79 | 0.94 | 0.93 | 0.89 | 0.08 | 6  | 49.1 | 7.51E-68 |
| IPI00061623 | Beta-SGT                                                               | Q96EQ0   | 0.95 |      |      | 0.95 |      | 4  | 15.1 | 3.38E-06 |
| IPI00061780 | Atrophin-1-interacting protein 4                                       | Q96J02-1 | 1.00 | 1.04 | 1.01 | 1.02 | 0.02 | 9  | 13   | 6.78E-70 |
| IPI00062120 | Aging-associated gene 13 protein                                       | Q96FQ6   | 1.14 | 1.17 | 1.32 | 1.21 | 0.09 | 6  | 38.8 | 8.11E-41 |
| IPI00062599 | 60 kDa BRG-1/Brm-associated factor subunit A                           | Q96GM5-1 |      | 1.10 | 1.00 | 1.05 | 0.07 | 4  | 10   | 3.8E-108 |
| IPI00062866 | Zinc finger CCCH-type antiviral protein 1-like                         | Q96H79-1 | 1.03 | 0.97 | 1.12 | 1.04 | 0.07 | 4  | 18.7 | 2.38E-14 |
| IPI00063130 | Transmembrane protein 205                                              | Q6UW68   | 1.01 | 0.76 | 0.89 | 0.89 | 0.12 | 2  | 16.9 | 3.25E-09 |
| IPI00063213 | Mediator complex subunit 30                                            | Q96HR3   | 1.50 |      | 1.58 | 1.54 | 0.06 | 2  | 11.8 | 8.32E-31 |
| IPI00063219 | H/ACA ribonucleoprotein complex non-core subunit NAF1                  | Q96HR8   | 1.12 |      |      | 1.12 |      | 2  | 5.3  | 7.61E-08 |
| IPI00063334 | Transmembrane protein 41A                                              | Q96HV5   |      | 0.93 |      | 0.93 |      | 2  | 10.6 | 0.001814 |
| IPI00063667 | Biorientation defective protein 1                                      | Q96IK1-1 | 1.16 |      |      | 1.16 |      | 3  | 23.8 | 3.18E-11 |
| IPI00063729 | hTREX45                                                                | Q96J01   | 0.79 |      | 1.14 | 0.97 | 0.25 | 5  | 17.2 | 3.51E-18 |
| IPI00063784 | Vesicle transport through interaction with t-SNAREs homolog 1B         | Q9UEU0-1 | 1.18 | 1.26 | 1.23 | 1.22 | 0.04 | 4  | 23.3 | 1.4E-184 |
| IPI00063827 | Abhydrolase domain-containing protein 14B                              | Q96IU4-1 |      | 1.19 |      | 1.19 |      | 2  | 16.7 | 1.42E-28 |
| IPI00063903 | HCV F-transactivated protein 2                                         | Q96IX5   | 1.05 |      |      | 1.05 |      | 2  | 27.6 | 3.6E-215 |
| IPI00063962 | Protein DPCD                                                           | Q9BVM2   |      | 0.88 |      | 0.88 |      | 2  | 10.3 | 4.19E-06 |
| IPI00064086 | EEF1D protein                                                          | Q4VBZ6   | 0.97 | 0.85 | 0.79 | 0.87 | 0.09 | 13 | 58.4 | 0        |
| IPI00064158 | Brain-derived tau kinase                                               | Q5TCY1-1 |      |      | 1.01 | 1.01 |      | 2  | 2.2  | 0.009079 |
| IPI00064162 | Deubiquitinating protein VCIP135                                       | Q96JH7   |      | 1.12 | 1.17 | 1.14 | 0.03 | 6  | 6.5  | 2.75E-39 |
| IPI00064193 | Protein disulfide-isomerase TMX3                                       | Q96JJ7-1 | 1.03 | 0.97 | 1.03 | 1.01 | 0.03 | 11 | 30.2 | 6.4E-194 |
| IPI00064212 | Zinc finger protein 828                                                | Q96JM3   | 1.08 | 1.56 | 1.32 | 1.32 | 0.24 | 5  | 8.9  | 2.87E-13 |
| IPI00064767 | Rho GTPase-activating protein 17                                       | Q68EM7-1 | 1.22 | 1.12 | 1.23 | 1.19 | 0.06 | 14 | 28.3 | 1.2E-100 |
| IPI00065276 | Alveolar soft part sarcoma chromosomal region candidate gene 1 protein | Q9BZE9-2 | 1.09 | 1.08 | 0.99 | 1.05 | 0.05 | 9  | 25.7 | 2.5E-106 |
| IPI00065500 | BRO1 domain-containing protein BROX                                    | Q5VW32   | 1.18 | 1.24 | 1.23 | 1.22 | 0.03 | 4  | 15.3 | 9.4E-110 |
| IPI00065671 | Cytidine monophosphokinase 2                                           | Q9BZX2-1 | 0.59 | 0.83 | 0.79 | 0.74 | 0.13 | 7  | 41   | 2.2E-123 |
| IPI00068506 | ATP-binding cassette, sub-family F (GCN20), member 2, isoform CRA_d    | Q75MJ1   | 0.72 | 0.97 |      | 0.84 | 0.17 | 3  | 5.5  | 1.71E-11 |
| IPI00069084 | 350/400 kDa PCAF-associated factor                                     | Q9Y4A5-1 | 0.17 |      |      | 0.17 |      | 3  | 0.9  | 0.000272 |

|             |                                                             |          |      |      |      |      |      |    |      |          |
|-------------|-------------------------------------------------------------|----------|------|------|------|------|------|----|------|----------|
| IPI00069309 | Leucine-rich repeat and WD repeat-containing protein 1      | Q9UFC0   | 1.18 | 1.00 | 1.17 | 1.12 | 0.10 | 3  | 6.7  | 4.55E-08 |
| IPI00069734 | Zinc finger matrin-type protein 2                           | Q96NC0   | 1.21 | 1.20 | 1.33 | 1.25 | 0.07 | 7  | 28.6 | 2.32E-11 |
| IPI00069817 | Bromodomain adjacent to zinc finger domain protein 1B       | Q9UIG0-1 | 0.90 | 1.19 | 1.03 | 1.04 | 0.14 | 15 | 13.8 | 1E-131   |
| IPI00070643 | FAS-associated factor 1                                     | Q9UNN5-1 | 0.85 | 0.81 | 0.92 | 0.86 | 0.05 | 4  | 6.5  | 1.83E-09 |
| IPI00070943 | Phosphatidylinositol 4-kinase alpha                         | P42356-1 |      |      | 1.01 | 1.01 |      | 2  | 1.6  | 0.020429 |
| IPI00071189 | Cell division cycle 2-like protein kinase 1                 | P21127-1 | 1.21 | 1.17 | 1.03 | 1.14 | 0.09 | 11 | 14.1 | 3.16E-45 |
| IPI00071318 | Putative RNA-binding protein Luc7-like 1                    | Q9NQ29-1 | 1.02 | 0.81 | 0.90 | 0.91 | 0.11 | 9  | 27.2 | 3.4E-158 |
| IPI00071697 | CAAT box DNA-binding protein subunit C                      | Q13952-1 |      |      | 1.27 | 1.27 |      | 2  | 4.6  | 0.000246 |
| IPI00071824 | CTCL tumor antigen se20-10                                  | Q8WWK9-1 | 0.87 | 1.41 | 1.31 | 1.19 | 0.29 | 3  | 6.1  | 4.16E-25 |
| IPI00072044 | Ester hydrolase C11orf54                                    | Q9H0W9-1 | 1.17 |      |      | 1.17 |      | 3  | 10.5 | 1.16E-05 |
| IPI00072534 | GCUNC-45                                                    | Q9H3U1-1 |      | 1.38 | 1.26 | 1.32 | 0.08 | 5  | 6.9  | 2.38E-36 |
| IPI00073179 | Vacuolar protein sorting-associated protein 33A             | Q96AX1   | 0.77 |      | 0.94 | 0.86 | 0.13 | 4  | 10.1 | 1.19E-11 |
| IPI00073602 | Exosome complex exonuclease MTR3                            | Q5RKV6   | 1.12 | 0.95 | 0.98 | 1.02 | 0.09 | 11 | 40.8 | 2E-135   |
| IPI00073779 | 28S ribosomal protein S28, mitochondrial                    | P82673-1 | 0.97 | 0.93 | 0.74 | 0.88 | 0.13 | 4  | 21.4 | 4.37E-27 |
| IPI00073958 | CB1 cannabinoid receptor-interacting protein 1              | Q96F85-1 | 0.89 | 0.99 | 1.05 | 0.98 | 0.08 | 7  | 58.5 | 5.96E-90 |
| IPI00074010 | Putative uncharacterized protein QTRTD1                     | C9JJ71   | 1.03 | 1.03 | 0.88 | 0.98 | 0.09 | 6  | 21.1 | 3.82E-64 |
| IPI00074258 | Microtubule-associated serine/threonine-protein kinase-like | Q96GX5-1 |      | 1.27 |      | 1.27 |      | 2  | 3.3  | 1.07E-11 |
| IPI00074587 | 40 kDa SR-repressor protein                                 | O75494-1 | 1.17 | 1.07 | 0.93 | 1.06 | 0.12 | 5  | 21.8 | 6.45E-35 |
| IPI00074604 | FK506-binding protein-associated protein                    | Q92990-1 |      | 1.13 | 0.97 | 1.05 | 0.12 | 5  | 10.6 | 1.1E-35  |
| IPI00075081 | Fanconi anemia group D2 protein                             | Q9BXW9-1 |      | 1.12 | 1.11 | 1.12 | 0.01 | 4  | 3.3  | 2.17E-06 |
| IPI00083708 | BAT2 domain-containing protein 1                            | Q9Y520-7 |      |      | 0.80 | 0.80 |      | 19 | 8.8  | 1.88E-55 |
| IPI00084571 | 39S ribosomal protein L39, mitochondrial                    | Q9NYK5-2 | 0.80 | 0.96 | 0.94 | 0.90 | 0.09 | 5  | 16.1 | 2.48E-26 |
| IPI00084828 | Syntaxin binding protein 1                                  | P61764-1 |      | 1.39 |      | 1.39 |      | 2  | 3.2  | 0.000224 |
| IPI00090327 | Vacuolar protein sorting-associated protein 45              | Q9NRW7   | 0.79 | 1.04 | 1.22 | 1.02 | 0.22 | 6  | 14.4 | 2.88E-16 |
| IPI00093057 | Coproporphyrinogen-III oxidase, mitochondrial               | P36551   | 0.91 | 1.04 | 0.99 | 0.98 | 0.06 | 13 | 31.7 | 5.2E-205 |
| IPI00094740 | RING finger protein 31                                      | Q96EP0-1 | 0.81 | 0.76 |      | 0.79 | 0.03 | 3  | 4.9  | 3.59E-12 |
| IPI00095891 | Adenylate cyclase-stimulating G alpha protein               | Q5JWF2-1 | 1.25 |      | 1.18 | 1.21 | 0.05 | 9  | 11.4 | 8.7E-46  |

|             |                                                                     |          |      |      |      |      |      |    |      |          |
|-------------|---------------------------------------------------------------------|----------|------|------|------|------|------|----|------|----------|
| IPI00096066 | GTP-specific succinyl-CoA synthetase subunit beta                   | Q96I99   | 1.04 | 1.18 | 1.10 | 1.11 | 0.07 | 10 | 23.4 | 4E-102   |
| IPI00097490 | UPF0407 protein C2orf39                                             | Q96MC2   | 1.18 |      |      | 1.18 |      | 2  | 2.7  | 0.003177 |
| IPI00097495 | Prostate antigen recognized and identified by SEREX 1               | Q9BYX2   | 1.12 |      | 0.95 | 1.04 | 0.12 | 3  | 4.1  | 6.18E-10 |
| IPI00098524 | Enzyme-like protein PIT13                                           | B5MDW3   | 1.55 |      |      | 1.55 |      | 1  | 6.6  | 0.00071  |
| IPI00098827 | Heat shock protein beta-11                                          | Q9Y547   | 1.07 | 1.28 | 1.22 | 1.19 | 0.11 | 3  | 27.8 | 1.02E-54 |
| IPI00099131 | Rotavirus X-associated non-structural protein                       | Q9UGR2-1 | 0.91 | 1.11 | 1.06 | 1.03 | 0.11 | 4  | 6    | 3.51E-44 |
| IPI00099311 | tRNA (adenine-N(1)-)-methyltransferase non-catalytic subunit TRM6   | Q9UJA5-1 |      | 0.90 | 0.81 | 0.86 | 0.06 | 2  | 7.2  | 1.77E-28 |
| IPI00099463 | Sphingosine-1-phosphate aldolase                                    | O95470   |      |      | 1.19 | 1.19 |      | 2  | 6.2  | 7.5E-08  |
| IPI00099497 | Transcription factor MafF                                           | Q9ULX9   | 1.30 |      | 1.76 | 1.53 | 0.32 | 5  | 39   | 1.11E-31 |
| IPI00099550 | Protein linking IAP with cytoskeleton 1                             | Q9UMX0-1 | 1.22 | 0.97 | 0.94 | 1.04 | 0.15 | 7  | 14.8 | 9.1E-161 |
| IPI00099871 | 39S ribosomal protein L40, mitochondrial                            | Q9NQ50   | 1.45 | 0.99 | 0.96 | 1.13 | 0.27 | 4  | 24.8 | 3.26E-12 |
| IPI00099986 | Fructosamine-3-kinase-related protein                               | Q9HA64   | 1.04 | 1.43 | 1.21 | 1.23 | 0.20 | 5  | 15.9 | 4.09E-12 |
| IPI00099996 | HBV pre-S2 trans-regulated protein 2                                | Q7L0Y3   | 0.80 | 0.87 | 0.99 | 0.89 | 0.10 | 8  | 25.8 | 2E-124   |
| IPI00100030 | GPI transamidase component PIG-T                                    | Q969N2-1 | 1.06 |      | 1.13 | 1.10 | 0.05 | 5  | 8    | 3.9E-28  |
| IPI00100106 | Protein Ric-8A                                                      | Q9NPQ8-3 | 0.86 |      |      | 0.86 |      | 10 | 27.2 | 5.2E-219 |
| IPI00100151 | 5-3 exoribonuclease 2                                               | Q9H0D6-1 | 0.90 | 1.08 | 1.05 | 1.01 | 0.10 | 19 | 21.8 | 8E-160   |
| IPI00100160 | Cullin-associated and neddylation-dissociated protein 1             | Q86VP6-1 | 1.02 | 1.00 | 1.08 | 1.04 | 0.04 | 48 | 41.6 | 0        |
| IPI00100213 | p53-inducible ribonucleotide reductase small subunit 2-like protein | Q7LG56-1 |      | 1.33 | 2.03 | 1.68 | 0.49 | 4  | 14.8 | 9.88E-12 |
| IPI00100239 | DORA reverse strand protein                                         | Q9H1A3-1 |      | 1.00 |      | 1.00 |      | 2  | 8.2  | 4.11E-05 |
| IPI00100247 | Thioredoxin domain-containing protein 13                            | Q9H1E5   | 1.27 | 1.10 |      | 1.19 | 0.12 | 1  | 3.7  | 1.41E-08 |
| IPI00100313 | CSN12-like protein                                                  | Q5JVF3-4 | 0.73 | 1.18 |      | 0.95 | 0.31 | 3  | 8.4  | 1.14E-40 |
| IPI00100460 | Aspartate--tRNA ligase                                              | Q6PI48   | 0.79 | 0.91 | 1.01 | 0.90 | 0.11 | 7  | 15.3 | 5.56E-37 |
| IPI00100656 | Synaptic glycoprotein SC2                                           | Q9NZ01-1 |      | 0.89 |      | 0.89 |      | 3  | 9.4  | 5.97E-05 |
| IPI00100673 | Charged multivesicular body protein 3                               | Q9Y3E7   |      | 1.16 | 1.18 | 1.17 | 0.01 | 4  | 18.9 | 2.85E-05 |
| IPI00100716 | 60 kDa poly(U)-binding-splicing factor                              | Q9UHX1-2 | 1.08 | 0.97 | 0.98 | 1.01 | 0.06 | 18 | 43.7 | 9.4E-239 |
| IPI00100731 | Protein SH(2)A                                                      | Q9H788   | 0.71 | 0.97 | 0.86 | 0.85 | 0.13 | 7  | 17.2 | 2.15E-23 |
| IPI00100748 | Heat shock protein-binding protein 1                                | Q9NZL4-1 | 0.90 | 1.12 | 0.96 | 0.99 | 0.11 | 8  | 23.5 | 4.2E-141 |

|             |                                                                                                                                   |          |      |      |      |      |      |    |      |          |
|-------------|-----------------------------------------------------------------------------------------------------------------------------------|----------|------|------|------|------|------|----|------|----------|
| IPI00100775 | UPF0366 protein C11orf67                                                                                                          | Q9H7C9-1 | 1.16 |      | 1.28 | 1.22 | 0.09 | 3  | 30.3 | 1E-141   |
| IPI00100796 | Charged multivesicular body protein 5                                                                                             | Q9NZZ3   | 1.35 | 1.17 | 1.09 | 1.20 | 0.14 | 8  | 34.2 | 1.16E-98 |
| IPI00100930 | cDNA FLJ58610                                                                                                                     | B4DRA4   | 1.23 |      |      | 1.23 |      | 1  | 6.1  | 2.88E-24 |
| IPI00100947 | Leukocyte receptor cluster member 1                                                                                               | Q96BZ8   | 1.20 | 0.70 |      | 0.95 | 0.35 | 4  | 18.9 | 8.86E-35 |
| IPI00100980 | EH domain-containing protein 2                                                                                                    | Q9NZN4   | 1.27 | 1.58 | 1.61 | 1.48 | 0.19 | 19 | 41.3 | 6E-192   |
| IPI00100984 | HEAT repeat-containing protein 3                                                                                                  | Q7Z4Q2-1 |      | 1.08 | 0.90 | 0.99 | 0.13 | 2  | 3.5  | 0.000974 |
| IPI00101037 | EF-hand calcium-binding protein RLP49                                                                                             | Q96D15   | 1.40 | 1.03 | 1.03 | 1.15 | 0.22 | 11 | 37.2 | 6.9E-247 |
| IPI00101106 | COMM domain-containing protein 5                                                                                                  | Q9GZQ3   |      |      | 1.09 | 1.09 |      | 2  | 10.3 | 2.72E-24 |
| IPI00101186 | RRP12-like protein                                                                                                                | Q5JTH9-1 | 0.75 | 0.75 | 0.79 | 0.76 | 0.02 | 10 | 9.1  | 9.35E-49 |
| IPI00101374 | MP70 protein family member                                                                                                        | O15321   | 0.97 | 0.96 |      | 0.97 | 0.01 | 3  | 3.8  | 3.29E-57 |
| IPI00101524 | ELL-associated protein of 30 kDa                                                                                                  | Q96H20-1 | 0.79 | 1.15 | 1.01 | 0.99 | 0.18 | 5  | 18.2 | 1.9E-148 |
| IPI00101608 | Cysteine-rich with EGF-like domain protein 1                                                                                      | Q96HD1-2 |      | 1.18 |      | 1.18 |      | 2  | 6.6  | 9.37E-05 |
| IPI00101645 | Putative adenosylhomocysteinase 3                                                                                                 | Q96HN2   | 0.99 |      |      | 0.99 |      | 5  | 7.4  | 3.26E-18 |
| IPI00101652 | Selenocysteine lyase                                                                                                              | Q96I15-1 | 1.13 |      | 0.81 | 0.97 | 0.22 | 2  | 7.6  | 1.69E-05 |
| IPI00101664 | Asparagine--tRNA ligase                                                                                                           | Q96I59   | 1.42 |      | 0.43 | 0.93 | 0.70 | 2  | 6.5  | 1.28E-08 |
| IPI00101961 | Myosin light polypeptide 6-like                                                                                                   |          | 0.97 |      |      | 0.97 |      | 3  | 15.9 | 1.67E-46 |
| IPI00101968 | Cervical mucin-associated protein                                                                                                 | Q9UJU6-3 |      | 1.11 |      | 1.11 |      | 12 | 35.1 | 2.8E-286 |
| IPI00102036 | ADP-ribosylation factor-like protein 5B                                                                                           | Q96KC2   |      | 1.01 |      | 1.01 |      | 3  | 16.2 | 3.02E-06 |
| IPI00102059 | Coated vesicle-associated kinase of 90 kDa                                                                                        | Q96KG9-1 | 0.99 | 1.15 | 1.02 | 1.05 | 0.09 | 12 | 21.2 | 1.57E-96 |
| IPI00102069 | Eukaryotic translation initiation factor 3 subunit M                                                                              | Q7L2H7   | 0.69 | 0.80 | 0.76 | 0.75 | 0.06 | 10 | 25.4 | 3.2E-241 |
| IPI00102096 | Stromal membrane-associated protein 1                                                                                             | Q8IYB5-1 | 1.08 |      |      | 1.08 |      | 2  | 5.4  | 1.87E-07 |
| IPI00102173 | UbcH8                                                                                                                             | Q96LR5   | 0.86 | 1.01 | 0.91 | 0.93 | 0.08 | 6  | 34.3 | 1.2E-139 |
| IPI00102182 | Zinc finger FYVE domain-containing protein 21                                                                                     | Q9BQ24-2 |      | 1.37 |      | 1.37 |      | 1  | 7.9  | 7.45E-05 |
| IPI00102313 | Steroid receptor RNA activator 1                                                                                                  | Q9HD15   | 0.99 | 1.06 | 1.08 | 1.04 | 0.05 | 6  | 27.8 | 1.15E-41 |
| IPI00102425 | Cyclin-dependent kinase inhibitor 2B-related protein                                                                              | Q96P16-1 | 1.01 | 1.18 | 1.16 | 1.12 | 0.09 | 12 | 35.9 | 2.1E-190 |
| IPI00102495 | cDNA FLJ76264, highly similar to Homo sapiens mediator of RNA polymerase II transcription, subunit 6 homolog (yeast) (MED6), mRNA | A8K3N2   |      | 1.11 |      | 1.11 |      | 3  | 14.6 | 2.7E-05  |
| IPI00102501 | AT1 receptor-associated protein                                                                                                   | Q6RW13-1 | 1.17 |      | 1.19 | 1.18 | 0.02 | 1  | 13.8 | 9.21E-48 |
| IPI00102660 | Progressive external ophthalmoplegia 1 protein                                                                                    | Q96RR1-1 | 1.60 |      |      | 1.60 |      | 2  | 3.1  | 0.017577 |

|             |                                                                                           |          |      |      |      |      |      |    |      |          |
|-------------|-------------------------------------------------------------------------------------------|----------|------|------|------|------|------|----|------|----------|
| IPI00102661 | Hepatocellular carcinoma-associated antigen 90                                            | Q96RR5   | 1.12 | 1.24 | 1.12 | 1.16 | 0.07 | 17 | 27.8 | 4.8E-149 |
| IPI00102752 | One-twenty two protein 1                                                                  | Q96T37-1 | 1.18 | 1.04 | 1.16 | 1.13 | 0.07 | 11 | 17.5 | 3.38E-56 |
| IPI00102815 | Factor for adipocyte differentiation 24                                                   | Q8WTT2   | 0.99 | 0.75 | 0.83 | 0.86 | 0.12 | 6  | 11.2 | 6.38E-60 |
| IPI00102856 | Stromal membrane-associated protein 1-like                                                | Q8WU79-1 |      | 1.17 |      | 1.17 |      | 2  | 4.7  | 0.000919 |
| IPI00102864 | Hexokinase type II                                                                        | P52789   | 0.84 | 0.96 | 0.89 | 0.90 | 0.06 | 14 | 19.3 | 1.39E-85 |
| IPI00102896 | Ras-related protein Rab-2B                                                                | Q8WUD1   | 1.07 | 1.19 | 1.23 | 1.16 | 0.08 | 9  | 47.2 | 1E-180   |
| IPI00102897 | Rab-like protein 3                                                                        | Q5HYI8   | 1.12 | 1.08 | 1.17 | 1.13 | 0.05 | 4  | 21.6 | 4.77E-91 |
| IPI00102909 | Protein FAM172A                                                                           | Q8WUF8-1 |      | 1.31 | 1.08 | 1.20 | 0.17 | 3  | 13.7 | 0.000534 |
| IPI00102962 | Protein canopy homolog 4                                                                  | Q8N129   |      | 0.87 |      | 0.87 |      | 2  | 9.3  | 0.000289 |
| IPI00102991 | cDNA FLJ61322, highly similar to RNA-binding motif, single-stranded-interacting protein 1 | B4DN88   |      |      | 0.86 | 0.86 |      | 5  | 12.4 | 6.73E-33 |
| IPI00103026 | PRMT3 protein                                                                             | Q8WUV3   | 0.64 | 0.97 | 0.93 | 0.84 | 0.18 | 4  | 8.4  | 2.37E-11 |
| IPI00103057 | Protein FAM36A                                                                            | Q5RI15-2 |      | 1.02 | 0.87 | 0.95 | 0.10 | 2  | 20   | 1.39E-33 |
| IPI00103059 | K562 cell-derived leucine-zipper-like protein 1                                           | Q8WUY8   | 1.65 | 1.07 | 1.24 | 1.32 | 0.30 | 2  | 15.5 | 5.4E-51  |
| IPI00103064 | Exocyst complex component 7                                                               | Q9UPT5-3 | 1.03 | 1.15 | 0.99 | 1.06 | 0.08 | 5  | 12.1 | 4.78E-49 |
| IPI00103065 | MIT domain-containing protein 1                                                           | Q8WV92   |      | 1.12 |      | 1.12 |      | 2  | 11.2 | 7.32E-34 |
| IPI00103087 | Gem-associated protein 6                                                                  | Q8WXD5   | 0.80 | 0.85 | 0.79 | 0.81 | 0.03 | 4  | 28.1 | 2.22E-30 |
| IPI00103090 | Replicative senescence down-regulated leo1-like protein                                   | Q8WVC0-1 | 1.39 |      |      | 1.39 |      | 3  | 5.3  | 7.4E-27  |
| IPI00103142 | NudC domain-containing protein 2                                                          | Q8WVJ2   | 1.21 | 1.29 | 1.22 | 1.24 | 0.04 | 4  | 26.8 | 4.5E-156 |
| IPI00103145 | Class A basic helix-loop-helix protein 39                                                 | Q8WVJ9   |      |      | 2.54 | 2.54 |      | 2  | 10   | 2.12E-11 |
| IPI00103171 | Tumor necrosis factor alpha-induced protein 8-like protein 1                              | Q8WVP5   | 1.20 |      |      | 1.20 |      | 2  | 12.4 | 8.17E-20 |
| IPI00103247 | Heterogeneous nuclear ribonucleoprotein L-like                                            | Q8WVV9-1 | 1.01 | 1.09 | 1.16 | 1.09 | 0.07 | 9  | 25.6 | 1.63E-90 |
| IPI00103252 | Protein FAM28A                                                                            | Q6NW29   | 1.05 | 0.95 | 0.93 | 0.98 | 0.06 | 3  | 15.4 | 2.45E-14 |
| IPI00103341 | Probable tRNA pseudouridine synthase 1                                                    | Q8WVWH5  |      | 1.16 |      | 1.16 |      | 3  | 8.9  | 4.53E-07 |
| IPI00103467 | Aldehyde dehydrogenase 5                                                                  | P30837   | 0.78 | 0.83 | 0.82 | 0.81 | 0.03 | 14 | 35   | 6.1E-303 |
| IPI00103483 | Cofactor of BRCA1                                                                         | Q8WX92   | 1.25 | 1.33 | 1.11 | 1.23 | 0.11 | 7  | 18.1 | 1.43E-61 |
| IPI00103509 | NADH dehydrogenase ubiquinone 1 alpha subcomplex                                          | Q8WXC9   | 0.91 |      |      | 0.91 |      | 3  | 10   | 1.48E-05 |
| IPI00103521 | Stoned B                                                                                  | Q8WXE9-  | 2.26 |      | 0.80 | 1.53 | 1.04 | 1  | 1    | 5.83E-06 |

|             |                                                                                | 1        |      |      |      |      |      |    |      |          |
|-------------|--------------------------------------------------------------------------------|----------|------|------|------|------|------|----|------|----------|
| IPI00103525 | Paraspeckle component 1                                                        | Q8WXF1-1 | 1.21 | 0.95 | 1.01 | 1.06 | 0.14 | 12 | 24.3 | 1.9E-133 |
| IPI00103552 | Mucin-16                                                                       | Q8WXI7   |      |      | 1.03 | 1.03 |      | 5  | 0.2  | 6.85E-05 |
| IPI00103554 | GATA zinc finger domain-containing protein 2B                                  | Q8WXI9   | 1.07 | 1.29 | 1.24 | 1.20 | 0.11 | 7  | 17.9 | 5.39E-78 |
| IPI00103599 | BRI3-binding protein                                                           | Q8WY22   | 1.68 | 0.99 | 1.18 | 1.28 | 0.36 | 4  | 20.7 | 1.2E-120 |
| IPI00103654 | Serine/threonine-protein phosphatase 4 regulatory subunit 2                    | Q9NY27-1 | 0.92 | 1.10 | 1.21 | 1.08 | 0.15 | 7  | 24   | 2.39E-43 |
| IPI00103884 | Ovarian cancer-associated gene 2 protein                                       | Q8WZ82   |      | 1.16 | 0.99 | 1.08 | 0.12 | 1  | 5.7  | 2.89E-32 |
| IPI00103925 | Immunity-related GTPase family Q protein                                       | Q8WZA9   | 0.98 | 0.95 | 1.04 | 0.99 | 0.05 | 8  | 21.2 | 5.87E-59 |
| IPI00103940 | Major facilitator superfamily domain-containing protein 10                     | Q14728   |      |      | 1.33 | 1.33 |      | 1  | 2.9  | 0.000215 |
| IPI00103994 | Leucine--tRNA ligase                                                           | Q9P2J5   | 0.85 | 1.01 | 0.94 | 0.94 | 0.08 | 38 | 36.2 | 0        |
| IPI00104050 | Thyroid hormone receptor-associated protein 3                                  | Q9Y2W1   | 1.41 | 1.16 | 1.18 | 1.25 | 0.14 | 17 | 22.2 | 4.6E-124 |
| IPI00105598 | 26S proteasome non-ATPase regulatory subunit 11                                | O00231   | 0.97 | 1.04 | 1.02 | 1.01 | 0.04 | 19 | 52   | 1.7E-252 |
| IPI00105620 | Adenovirus E3 14.7 kDa-interacting protein 1                                   | Q7L523   |      |      | 1.20 | 1.20 |      | 4  | 13.4 | 9.46E-18 |
| IPI00106491 | mRNA turnover protein 4 homolog                                                | Q9UKD2   | 0.92 | 0.82 | 0.86 | 0.87 | 0.05 | 14 | 48.1 | 4.1E-160 |
| IPI00106495 | Chromosome-associated protein G                                                | Q9BPX3   | 1.04 | 1.15 | 1.06 | 1.08 | 0.06 | 25 | 29.8 | 0        |
| IPI00106506 | Evolutionarily conserved signaling intermediate in Toll pathway, mitochondrial | Q9BQ95-1 | 1.01 | 0.80 | 0.90 | 0.90 | 0.11 | 4  | 17.6 | 8.97E-45 |
| IPI00106549 | Diphthamide biosynthesis protein 2                                             | Q9BQC3   | 0.84 | 0.87 | 0.81 | 0.84 | 0.03 | 1  | 3.9  | 4.66E-40 |
| IPI00106638 | UPF0399 protein C6orf153                                                       | Q96EU6-1 | 0.87 | 0.90 | 0.76 | 0.85 | 0.07 | 4  | 16.6 | 9.78E-22 |
| IPI00106642 | PWP1-interacting protein 8                                                     | Q9HCN8   | 1.02 | 0.90 | 0.84 | 0.92 | 0.09 | 20 | 45.4 | 0        |
| IPI00106698 | Protein pelota homolog                                                         | Q9BRX2   | 0.81 | 1.07 | 1.01 | 0.96 | 0.14 | 9  | 22.1 | 1.8E-166 |
| IPI00106913 | Dehydrogenase/reductase SDR family member 4                                    | Q9BTZ2-1 | 0.85 | 0.82 | 1.08 | 0.92 | 0.14 | 5  | 14.7 | 4.63E-11 |
| IPI00106966 | Transmembrane protein 70, mitochondrial                                        | Q9BUB7-1 | 0.87 | 0.72 | 0.77 | 0.79 | 0.08 | 2  | 7.7  | 6.31E-10 |
| IPI00107104 | UPF0368 protein Cxorf26                                                        | Q9BVG4   | 1.04 | 1.04 | 1.00 | 1.03 | 0.02 | 6  | 32.2 | 2.8E-157 |
| IPI00107113 | Antigen NY-CO-16                                                               | Q9BVJ6-1 | 1.13 | 0.85 | 0.87 | 0.95 | 0.16 | 16 | 29.1 | 1.7E-280 |
| IPI00107122 | Nucleoporin p58/p45                                                            | Q9BVL2-1 | 1.67 | 0.98 | 1.08 | 1.24 | 0.37 | 3  | 7.3  | 1.44E-43 |
| IPI00107155 | Putative uncharacterized protein C3orf75                                       | A8MQ59   |      | 1.13 |      | 1.13 |      | 3  | 13.9 | 1.26E-06 |
| IPI00107339 | DGCRK3                                                                         | Q9BYB4-1 |      |      | 1.17 | 1.17 |      | 2  | 11.9 | 2.41E-08 |
| IPI00107555 | Profilin                                                                       | B4DNH1   | 0.97 | 1.23 | 1.26 | 1.15 | 0.16 | 7  | 33.5 | 2.6E-188 |

|             |                                                                    |          |      |      |      |      |      |    |      |          |
|-------------|--------------------------------------------------------------------|----------|------|------|------|------|------|----|------|----------|
| IPI00107563 | Ribonuclease P/MRP protein subunit POP5                            | Q969H6   |      | 1.12 | 1.02 | 1.07 | 0.07 | 2  | 11.7 | 7.37E-11 |
| IPI00107693 | Activator-recruited cofactor 105 kDa component                     | Q96RN5-1 | 0.77 | 1.12 | 1.00 | 0.96 | 0.18 | 3  | 7.6  | 3.59E-40 |
| IPI00107745 | cAMP regulatory element-associated protein 1                       | O95232-1 | 0.94 | 1.01 | 1.00 | 0.98 | 0.04 | 11 | 27.1 | 2.5E-197 |
| IPI00107752 | Dynamin-like 120 kDa protein, form S1                              | O60313-2 |      | 1.12 |      | 1.12 |      | 8  | 11.2 | 1.91E-78 |
| IPI00107753 | Dynamin-like 120 kDa protein, form S1                              | O60313-2 | 1.01 |      | 1.21 | 1.11 | 0.14 | 6  | 8.6  | 2.13E-49 |
| IPI00107831 | Leukocyte common antigen related                                   | P10586-1 | 2.18 |      |      | 2.18 |      | 3  | 2.2  | 2.75E-08 |
| IPI00140201 | Component of oligomeric Golgi complex 8                            | Q96MW5   | 0.65 |      | 1.29 | 0.97 | 0.45 | 2  | 7.2  | 1.38E-11 |
| IPI00140420 | 100 kDa coactivator                                                | Q7KZF4   | 0.84 | 0.98 | 0.96 | 0.93 | 0.08 | 39 | 49.8 | 0        |
| IPI00141318 | 63 kDa membrane protein                                            | Q07065-1 | 1.18 | 1.05 | 1.14 | 1.13 | 0.07 | 46 | 72.6 | 0        |
| IPI00141561 | Component of oligomeric Golgi complex 1                            | Q8WTW3   |      |      | 1.12 | 1.12 |      | 2  | 1.9  | 4.59E-05 |
| IPI00143753 | 140 kDa Ser/Arg-rich domain protein                                | O15042-1 | 0.98 | 0.92 | 0.91 | 0.94 | 0.04 | 9  | 12.4 | 5.47E-46 |
| IPI00143921 | KDEL motif-containing protein 2                                    | Q7Z4H8-1 | 1.08 |      | 1.49 | 1.29 | 0.29 | 5  | 12   | 1.07E-68 |
| IPI00144293 | Putative splicing factor YT521                                     | Q96MU7-1 |      | 1.15 |      | 1.15 |      | 4  | 5.6  | 4.35E-14 |
| IPI00145260 | Putative transferase C1orf69, mitochondrial                        | Q5T440   |      | 1.13 | 0.76 | 0.94 | 0.26 | 2  | 10.1 | 1.32E-06 |
| IPI00145593 | Nucleolar MIF4G domain-containing protein 1                        | Q5C9Z4   |      | 0.65 | 1.12 | 0.89 | 0.33 | 2  | 3.3  | 3.06E-08 |
| IPI00146447 | Myopathy with excessive autophagy protein                          | Q3ZQA7   | 1.17 | 0.97 | 0.92 | 1.02 | 0.13 | 1  | 11.9 | 0.000906 |
| IPI00146935 | Dnm1p/Vps1p-like protein                                           | O00429-1 |      | 1.15 |      | 1.15 |      | 38 | 62.8 | 0        |
| IPI00147874 | N-acetylneuraminase synthase                                       | Q9NR45   | 0.96 | 1.04 | 1.03 | 1.01 | 0.05 | 14 | 45.4 | 1.8E-258 |
| IPI00148063 | Heme-binding protein 1                                             | Q9NRV9   | 1.07 | 1.05 | 1.05 | 1.06 | 0.01 | 8  | 58.2 | 6.8E-261 |
| IPI00149276 | Brain and reproductive organ-expressed protein                     | Q9NXR7-1 | 0.98 |      | 1.16 | 1.07 | 0.13 | 2  | 4.8  | 0.00022  |
| IPI00149650 | Peptidylprolyl isomerase domain and WD repeat-containing protein 1 | Q96BP3   |      | 0.93 | 0.90 | 0.91 | 0.02 | 4  | 9.8  | 5.34E-08 |
| IPI00149849 | Component of oligomeric Golgi complex 4                            | Q9H9E3-3 |      | 1.24 |      | 1.24 |      | 2  | 3.9  | 6.03E-27 |
| IPI00150269 | PRP4 homolog                                                       | O43172-1 | 0.99 | 1.15 | 1.05 | 1.06 | 0.08 | 11 | 25.7 | 2E-129   |
| IPI00150963 | RNA pseudouridylate synthase domain-containing protein 2           | Q8IZ73   |      |      | 0.58 | 0.58 |      | 2  | 11.4 | 0.01727  |
| IPI00151170 | Dual specificity protein kinase TTK                                | P33981   | 0.77 | 1.23 | 0.72 | 0.91 | 0.28 | 4  | 7.6  | 4.17E-08 |
| IPI00151462 | Microtubule-associated proteins 1A/1B light chain 3 beta 2         | A6NCE7   | 0.80 | 1.13 | 1.27 | 1.07 | 0.24 | 3  | 21.6 | 1.38E-07 |
| IPI00152001 | Brain-expressed RING finger protein                                | O75382-1 |      | 1.09 | 1.00 | 1.05 | 0.06 | 2  | 4    | 8.83E-05 |
| IPI00152002 | Coiled-coil domain-containing protein 115                          | Q96NT0   | 0.96 | 1.33 | 1.29 | 1.19 | 0.20 | 3  | 20.6 | 3.22E-37 |

|             |                                                                                                                                |          |      |      |      |      |      |    |      |          |
|-------------|--------------------------------------------------------------------------------------------------------------------------------|----------|------|------|------|------|------|----|------|----------|
| IPI00152011 | PTPL1-associated RhoGAP protein 1                                                                                              | Q52LW3-1 | 1.06 | 1.23 | 1.22 | 1.17 | 0.09 | 10 | 9.2  | 9.17E-91 |
| IPI00152083 | TTD non-photosensitive 1 protein                                                                                               | Q8TAP9   |      |      | 1.16 | 1.16 |      | 2  | 19   | 3.53E-14 |
| IPI00152089 | Uncharacterized protein CXorf38                                                                                                | Q8TB03-1 | 0.80 |      |      | 0.80 |      | 2  | 6.6  | 0.000445 |
| IPI00152196 | Haloacid dehalogenase-like hydrolase domain-containing protein 4                                                               | Q8TBE9   |      | 0.77 | 0.94 | 0.85 | 0.12 | 2  | 12.1 | 3.07E-96 |
| IPI00152303 | Phosphatidylinositol-5-phosphate 4-kinase type II gamma                                                                        | Q8TBX8   | 1.30 | 1.41 | 1.43 | 1.38 | 0.08 | 6  | 11.2 | 9.4E-40  |
| IPI00152377 | Dolichyl-diphosphooligosaccharide--protein glycosyltransferase subunit STT3B                                                   | Q8TCJ2   |      | 0.62 | 0.98 | 0.80 | 0.26 | 5  | 8    | 5.99E-11 |
| IPI00152491 | cDNA FLJ43030 fis, clone BRTHA3000633, highly similar to Homo sapiens CD99 antigen-like 2 (CD99L2), transcript variant 1, mRNA | B3KWG2   |      |      | 1.03 | 1.03 |      | 2  | 12.9 | 5.01E-38 |
| IPI00152503 | B-lymphoma- and BAL-associated protein                                                                                         | Q8TDB6-1 | 0.94 | 1.16 |      | 1.05 | 0.15 | 2  | 4.2  | 1.52E-11 |
| IPI00152510 | DEAD (Asp-Glu-Ala-Asp) box polypeptide 54, isoform CRA_a                                                                       | B9ZVP3   | 0.82 | 1.02 | 0.89 | 0.91 | 0.10 | 12 | 15.5 | 3.03E-78 |
| IPI00152627 | C11orf30 protein                                                                                                               | B7ZKU0   |      |      | 0.81 | 0.81 |      | 3  | 1.7  | 0.002933 |
| IPI00152658 | Never in mitosis A-related kinase 7                                                                                            | Q8TDX7   | 0.83 | 0.94 | 0.92 | 0.90 | 0.05 | 9  | 36.8 | 5.1E-82  |
| IPI00152671 | Protein FAM91A1                                                                                                                | Q658Y4   | 1.03 | 1.01 | 1.00 | 1.01 | 0.02 | 4  | 7.2  | 1.65E-57 |
| IPI00152695 | Swd2                                                                                                                           | Q6UXN9   | 1.03 | 1.15 | 1.21 | 1.13 | 0.09 | 6  | 22.7 | 3.3E-136 |
| IPI00152708 | U3 small nucleolar RNA-associated protein 15 homolog                                                                           | Q8TED0   |      | 0.70 | 0.74 | 0.72 | 0.03 | 8  | 18.5 | 1.12E-57 |
| IPI00152785 | Histone H2B type 1-O                                                                                                           | P23527   |      | 1.03 | 1.14 | 1.09 | 0.08 | 12 | 64.3 | 7.4E-159 |
| IPI00152850 | JAM-2                                                                                                                          | Q9BX67   |      | 1.12 |      | 1.12 |      | 2  | 7.6  | 0.009825 |
| IPI00152853 | Phostensin                                                                                                                     | Q6NYC8-1 | 1.19 | 1.03 | 0.95 | 1.06 | 0.12 | 12 | 29.9 | 7.9E-237 |
| IPI00152890 | Nucleolar protein 6                                                                                                            | Q9H6R4-1 | 0.77 | 0.76 | 0.81 | 0.78 | 0.03 | 15 | 14.6 | 5.6E-93  |
| IPI00152900 | Leucine zipper and CTNNBIP1 domain-containing protein                                                                          | Q8WZA0   | 1.02 | 0.98 | 1.00 | 1.00 | 0.02 | 6  | 20.9 | 1.2E-112 |
| IPI00152946 | Male germ cell RacGap                                                                                                          | Q9H0H5   | 0.86 | 1.46 | 1.28 | 1.20 | 0.31 | 9  | 22.5 | 2.12E-91 |
| IPI00152981 | Acyl-CoA dehydrogenase family member 9, mitochondrial                                                                          | Q9H845   | 1.10 | 1.04 | 1.00 | 1.05 | 0.05 | 8  | 18   | 2.19E-36 |
| IPI00152998 | Leucine-rich repeat-containing protein 40                                                                                      | Q9H9A6   | 1.12 | 1.02 | 1.04 | 1.06 | 0.05 | 13 | 28.7 | 7.24E-70 |
| IPI00153023 | Coiled-coil domain-containing protein 51                                                                                       | Q96ER9-1 | 0.92 | 1.16 |      | 1.04 | 0.17 | 2  | 7.5  | 9.49E-40 |
| IPI00153032 | Protein LTV1 homolog                                                                                                           | Q96GA3   | 0.65 | 0.68 | 0.73 | 0.68 | 0.04 | 2  | 7.4  | 1.8E-102 |
| IPI00154283 | Cancerous inhibitor of PP2A                                                                                                    | Q8TCG1-1 | 0.67 | 0.97 | 0.85 | 0.83 | 0.15 | 13 | 13.5 | 1.69E-75 |
| IPI00154451 | cDNA FLJ55586, highly similar to MMS19-like                                                                                    | B4DQX2   | 1.09 |      | 0.58 | 0.83 | 0.37 | 4  | 4.9  | 2.41E-08 |



|             | protein                                               |          |      |      |      |      |      |    |      |          |  |
|-------------|-------------------------------------------------------|----------|------|------|------|------|------|----|------|----------|--|
| IPI00154473 | Elongation factor G 1, mitochondrial                  | Q96RP9-1 |      | 0.90 | 0.89 | 0.89 | 0.00 | 12 | 19.4 | 6.61E-65 |  |
| IPI00154515 | FHA domain-containing protein SNIP1                   | Q8TAD8   | 1.09 |      | 1.38 | 1.23 | 0.21 | 1  | 3.5  | 3.43E-21 |  |
| IPI00154590 | MKI67 FHA domain-interacting nucleolar phosphoprotein | Q9BYG3   | 0.83 | 0.80 | 0.75 | 0.79 | 0.04 | 15 | 43.3 | 3E-266   |  |
| IPI00154668 | Coiled-coil domain-containing protein 93              | Q567U6   |      |      | 1.33 | 1.33 |      | 2  | 3.6  | 2.23E-67 |  |
| IPI00154778 | Protein Muted homolog                                 | Q8TDH9-1 |      | 1.24 |      | 1.24 |      | 2  | 10.2 | 0.000292 |  |
| IPI00154975 | DnaJ homolog subfamily C member 9                     | Q8WXX5   | 1.00 | 1.25 | 1.17 | 1.14 | 0.13 | 11 | 44.6 | 0        |  |
| IPI00156032 | HIV-1 Rev-binding protein 2                           | Q13601   | 0.95 | 1.00 | 0.98 | 0.98 | 0.02 | 4  | 16   | 1.76E-80 |  |
| IPI00156689 | Synaptic vesicle membrane protein VAT-1 homolog       | Q99536   | 1.43 | 1.16 | 1.21 | 1.27 | 0.14 | 12 | 39.4 | 1.2E-230 |  |
| IPI00156804 | Zinc finger protein 160-like                          | Q9H7R5   | 1.26 | 0.93 | 1.07 | 1.09 | 0.17 | 2  | 13.9 | 0.000869 |  |
| IPI00156984 | Charged multivesicular body protein 1b                | Q7LBR1   |      | 1.42 | 1.32 | 1.37 | 0.07 | 2  | 8.5  | 0.001579 |  |
| IPI00157215 | Uncharacterized protein C19orf52                      | Q9BSF4   |      |      | 0.86 | 0.86 |      | 2  | 9.6  | 1.83E-05 |  |
| IPI00157375 | DnaJ homolog subfamily C member 30                    | Q96LL9   |      | 1.14 |      | 1.14 |      | 2  | 8.4  | 0.000893 |  |
| IPI00157729 | Dendritic cell-derived ubiquitin-like protein         | Q8WUN7   |      | 1.17 |      | 1.17 |      | 1  | 5.6  | 8.77E-13 |  |
| IPI00157734 | Exocyst complex component 3                           | O60645-1 |      | 1.67 |      | 1.67 |      | 2  | 2.6  | 0.001812 |  |
| IPI00157757 | Molecule interacting with CasL protein 1              | Q8TDZ2-1 | 0.97 | 1.10 | 1.13 | 1.07 | 0.09 | 4  | 5.7  | 1.73E-60 |  |
| IPI00157790 | Proteasome-associated protein ECM29 homolog           | Q5VYK3   | 0.89 | 1.08 | 0.93 | 0.97 | 0.10 | 24 | 16.1 | 5.7E-259 |  |
| IPI00158020 | Arginine/serine-rich-splicing factor 14               | Q8IX01-1 |      | 0.90 | 1.20 | 1.05 | 0.21 | 7  | 12.8 | 2.1E-19  |  |
| IPI00159899 | Ankyrin repeat and FYVE domain-containing protein 1   | Q9P2R3-1 | 0.87 | 1.19 | 1.15 | 1.07 | 0.17 | 14 | 16.4 | 3.3E-194 |  |
| IPI00160421 | 39S ribosomal protein L18, mitochondrial              | Q9H0U6   | 0.93 | 0.75 | 0.91 | 0.86 | 0.10 | 5  | 24.4 | 1.02E-08 |  |
| IPI00160901 | Putative uncharacterized protein GTSE1                | A8MRT0   | 0.77 | 1.95 | 1.58 | 1.44 | 0.60 | 2  | 3.9  | 5.73E-07 |  |
| IPI00162330 | 39S ribosomal protein L2, mitochondrial               | Q9BZE1   | 0.92 | 0.91 | 0.92 | 0.92 | 0.00 | 6  | 22   | 0        |  |
| IPI00162563 | 95 kDa retinoblastoma-associated protein              | O75150-1 | 1.11 | 1.29 | 0.96 | 1.12 | 0.16 | 8  | 10   | 2.87E-76 |  |
| IPI00163084 | Pre-mRNA-splicing factor SYF1                         | Q9HCS7   | 0.89 | 1.15 | 1.22 | 1.09 | 0.18 | 13 | 18.8 | 1.6E-168 |  |
| IPI00163172 | Putative uncharacterized protein SKP2                 | C9JN85   |      | 0.24 |      | 0.24 |      | 1  | 3.6  | 0.000122 |  |
| IPI00163230 | COP9 signalosome complex subunit 6                    | Q7L5N1   | 0.94 | 1.13 | 1.10 | 1.06 | 0.10 | 13 | 42.5 | 6.8E-172 |  |
| IPI00163361 | T-box transcription factor TBX14                      | Q96SF7   |      |      | 1.84 | 1.84 |      | 1  | 3.7  | 0.000566 |  |
| IPI00163381 | Growth suppressor 1                                   | Q32P28-1 | 1.25 | 1.15 |      | 1.20 | 0.07 | 17 | 28.7 | 6.5E-176 |  |
| IPI00163391 | Methyltransferase 10 domain-containing                | Q86W50-  |      | 1.25 | 0.97 | 1.11 | 0.20 | 3  | 4.6  | 0.000222 |  |

|             | protein                                                                               | 1        |      |      |      |      |      |    |      |          |
|-------------|---------------------------------------------------------------------------------------|----------|------|------|------|------|------|----|------|----------|
| IPI00163496 | LAR-interacting protein 1                                                             | Q13136-1 | 1.09 | 0.93 | 1.06 | 1.03 | 0.08 | 5  | 5.4  | 1.63E-21 |
| IPI00163505 | Hepatocellular carcinoma protein 1                                                    | Q14498-1 | 0.90 | 1.10 | 1.02 | 1.01 | 0.10 | 9  | 18.1 | 1.8E-99  |
| IPI00163644 | Oxysterol-binding protein-related protein 8                                           | Q9BZF1-1 | 1.00 | 1.15 | 1.00 | 1.05 | 0.09 | 11 | 17.9 | 2.5E-159 |
| IPI00163849 | cDNA FLJ60624, highly similar to Epidermal growth factor receptor substrate 15-like 1 | B4DKA3   | 1.11 | 0.95 | 1.06 | 1.04 | 0.08 | 11 | 26.3 | 2.5E-145 |
| IPI00163851 | Eukaryotic translation initiation factor 2-alpha kinase 4                             | Q9P2K8-1 | 0.90 |      |      | 0.90 |      | 3  | 2.2  | 0.001743 |
| IPI00164672 | mRNA-decapping enzyme 1A                                                              | Q9NPI6   |      |      | 0.78 | 0.78 |      | 3  | 9.8  | 7.35E-18 |
| IPI00164949 | Negative elongation factor C/D                                                        | Q8IXH7-1 | 0.97 | 1.13 | 1.11 | 1.07 | 0.09 | 4  | 9.8  | 1.26E-68 |
| IPI00165026 | SET domain-containing protein 3                                                       | Q86TU7-1 | 0.99 | 1.19 | 1.15 | 1.11 | 0.11 | 7  | 14   | 3.86E-84 |
| IPI00165092 | Tyrosine--tRNA ligase                                                                 | Q9Y2Z4   | 0.91 | 0.96 | 0.96 | 0.94 | 0.03 | 9  | 20.1 | 9.1E-103 |
| IPI00165171 | DiGeorge syndrome critical region 13                                                  | Q96DF8   | 1.75 | 1.23 | 1.09 | 1.36 | 0.34 | 4  | 15.5 | 1.04E-81 |
| IPI00165230 | DAZ-associated protein 1                                                              | Q96EP5-1 | 1.08 | 1.12 | 0.97 | 1.06 | 0.07 | 7  | 24.8 | 5.3E-258 |
| IPI00165357 | Metastasis-associated protein MTA3                                                    | Q9BTC8-1 |      | 1.11 | 1.10 | 1.10 | 0.00 | 6  | 10.8 | 4.5E-101 |
| IPI00165361 | DCN1-like protein 5                                                                   | Q9BTE7   | 0.78 | 0.97 | 0.92 | 0.89 | 0.10 | 5  | 21.1 | 1.21E-69 |
| IPI00165393 | Acidic leucine-rich nuclear phosphoprotein 32 family member E                         | Q9BTT0   | 1.23 |      | 1.11 | 1.17 | 0.08 | 8  | 30.2 | 0        |
| IPI00165434 | cDNA FLJ58590, highly similar to YLP motif-containing protein 1                       | B4DMQ9   | 1.51 | 0.92 | 1.05 | 1.16 | 0.31 | 5  | 4.4  | 7.94E-57 |
| IPI00165477 | Elongator complex protein 3                                                           | Q9H9T3-1 | 0.67 | 0.87 | 0.81 | 0.78 | 0.10 | 5  | 11.9 | 2.65E-19 |
| IPI00165506 | 38 kDa DNA polymerase delta interaction protein                                       | Q9Y2S7   | 0.89 | 0.96 | 0.96 | 0.94 | 0.04 | 9  | 27.2 | 9.43E-79 |
| IPI00165587 | Galectin-8                                                                            | O00214-2 | 1.10 |      | 1.61 | 1.35 | 0.37 | 2  | 6.4  | 2.06E-09 |
| IPI00165651 | Endoplasmic reticulum-Golgi intermediate compartment protein 2                        | Q96RQ1   | 0.97 |      | 1.05 | 1.01 | 0.06 | 2  | 9    | 4.81E-12 |
| IPI00165949 | Adipocyte-derived leucine aminopeptidase                                              | Q9NZ08-2 | 1.28 | 1.51 | 1.15 | 1.31 | 0.18 | 5  | 8    | 8.33E-78 |
| IPI00165981 | NFX1-type zinc finger-containing protein 1                                            | Q9P2E3-1 | 1.25 |      |      | 1.25 |      | 2  | 1.7  | 1.28E-07 |
| IPI00166010 | CCR4-associated factor 1                                                              | A5YKK6-1 | 1.12 | 1.04 | 0.95 | 1.04 | 0.09 | 7  | 3.4  | 1.49E-50 |
| IPI00166044 | p150 target of rapamycin (TOR)-scaffold protein                                       | Q8N122-1 |      |      | 0.79 | 0.79 |      | 3  | 2.5  | 3.36E-05 |
| IPI00166066 | ORM1-like protein 3                                                                   | Q8N138-1 |      |      | 1.53 | 1.53 |      | 2  | 11.8 | 0.017977 |
| IPI00166153 | FtsJ methyltransferase domain-containing protein 2                                    | Q8N1G2   | 1.04 | 1.22 | 1.09 | 1.11 | 0.09 | 4  | 5.7  | 3.38E-05 |
| IPI00166395 | Acyl-CoA synthetase family member 3,                                                  | Q4G176-1 |      |      | 0.97 | 0.97 |      | 2  | 4.9  | 1.19E-06 |

|             |                                                                                                  |          |      |      |      |      |      |    |      |          |
|-------------|--------------------------------------------------------------------------------------------------|----------|------|------|------|------|------|----|------|----------|
|             | mitochondrial                                                                                    |          |      |      |      |      |      |    |      |          |
| IPI00166444 | SFT2 domain-containing protein 3                                                                 | Q587I9   | 0.97 |      | 1.11 | 1.04 | 0.10 | 3  | 27   | 1.67E-28 |
| IPI00166526 | Apoptosis-inducing TAF9-like domain-containing protein 1                                         | Q8N2Z9-1 | 1.06 |      |      | 1.06 |      | 2  | 17.4 | 1.17E-07 |
| IPI00166638 | UPF0598 protein C8orf82                                                                          | Q6P1X6-1 | 1.23 |      | 1.45 | 1.34 | 0.15 | 4  | 25   | 2.73E-20 |
| IPI00166749 | Alpha-MPP                                                                                        | Q107I3   | 1.02 | 1.01 | 1.22 | 1.08 | 0.12 | 3  | 9    | 7.29E-16 |
| IPI00166785 | Membrane magnesium transporter 1                                                                 | Q8N4V1-2 |      | 1.11 |      | 1.11 |      | 1  | 12.2 | 4.96E-45 |
| IPI00166835 | Protein FAM26E                                                                                   | Q8N5C1   | 0.85 |      |      | 0.85 |      | 2  | 7.4  | 1.58E-22 |
| IPI00166861 | Uncharacterized protein C12orf45                                                                 | Q8N5I9   |      | 0.53 |      | 0.53 |      | 2  | 12.8 | 0.026039 |
| IPI00166865 | CDGSH iron sulfur domain-containing protein 2                                                    | Q8N5K1   | 0.94 | 0.93 | 1.00 | 0.96 | 0.04 | 3  | 28.1 | 3.77E-61 |
| IPI00166873 | Alba-like protein C9orf23                                                                        | Q8N5L8   | 1.32 | 0.98 | 0.98 | 1.09 | 0.20 | 3  | 19.6 | 4.51E-14 |
| IPI00166931 | Drosophila-related expressed sequence 17                                                         | Q86TP1-1 |      |      | 0.95 | 0.95 |      | 2  | 7.9  | 1.06E-31 |
| IPI00166945 | Protein FAM101B                                                                                  | Q8N5W9   | 0.72 | 0.84 | 0.80 | 0.79 | 0.06 | 4  | 36.9 | 4.82E-45 |
| IPI00166955 | Protein canopy homolog 4                                                                         | Q8N129   | 1.53 |      | 1.35 | 1.44 | 0.12 | 2  | 5.1  | 2.19E-16 |
| IPI00166956 | Leucine-rich repeat-containing protein 35                                                        | Q5QJ74   | 0.88 |      |      | 0.88 |      | 2  | 6.8  | 0.000197 |
| IPI00167074 | ADP-ribosylation factor-like protein 6-interacting protein 6                                     | Q8N6S5   |      | 1.08 | 1.24 | 1.16 | 0.11 | 3  | 10.2 | 7.36E-13 |
| IPI00167368 | N-alpha-acetyltransferase 16, NatA auxiliary subunit                                             | Q6N069-1 |      |      | 0.81 | 0.81 |      | 8  | 7.8  | 2.4E-17  |
| IPI00167535 | CAG repeat protein 32                                                                            | Q96L91-1 |      | 1.20 | 0.73 | 0.96 | 0.33 | 2  | 0.8  | 2.37E-16 |
| IPI00167538 | Cytochrome c oxidase assembly protein 18                                                         | Q8N8Q8-1 |      | 0.82 |      | 0.82 |      | 2  | 7.8  | 0.00012  |
| IPI00167638 | GTP-binding protein 10                                                                           | A4D1E9-1 | 0.84 | 1.10 | 0.81 | 0.91 | 0.16 | 4  | 16.5 | 2.22E-27 |
| IPI00167783 | Protein SFRS12IP1                                                                                | Q8N9Q2   |      |      | 1.04 | 1.04 |      | 2  | 12.3 | 4.72E-05 |
| IPI00168262 | Glycosyltransferase 25 family member 1                                                           | Q8NBJ5   | 1.13 | 1.04 | 1.12 | 1.09 | 0.05 | 16 | 24.4 | 3.9E-140 |
| IPI00168317 | Kinetochore protein Spc24                                                                        | Q8NBT2   | 1.28 | 1.11 | 1.17 | 1.19 | 0.08 | 8  | 54.8 | 2.5E-244 |
| IPI00168336 | LEM domain-containing protein 2                                                                  | Q8NCS6   |      | 1.47 | 1.25 | 1.36 | 0.16 | 5  | 11.1 | 7.3E-23  |
| IPI00168378 | HCV NS5A-transactivated protein 4 splice variant A-binding protein 1                             | Q8NCE2-1 | 1.18 | 1.44 | 1.24 | 1.29 | 0.13 | 3  | 9.4  | 7.3E-73  |
| IPI00168388 | Signal recognition particle 68 kDa protein                                                       | Q9UHB9-1 | 0.93 | 1.07 | 1.03 | 1.01 | 0.08 | 24 | 43.7 | 0        |
| IPI00168479 | cDNA FLJ56357, highly similar to Homo sapiens apolipoprotein A-I binding protein (APOA1BP), mRNA | B4DP80   | 1.15 | 1.17 | 1.10 | 1.14 | 0.04 | 8  | 37.5 | 8.5E-277 |
| IPI00168691 | SHC SH2 domain-binding protein 1                                                                 | Q8NEM2   | 0.62 | 1.26 | 0.97 | 0.95 | 0.32 | 6  | 12.6 | 1.07E-36 |

|             |                                                                                                                          |          |      |      |      |      |      |    |      |          |
|-------------|--------------------------------------------------------------------------------------------------------------------------|----------|------|------|------|------|------|----|------|----------|
| IPI00168849 | Cdc42-interacting protein 4                                                                                              | Q15642-1 | 1.02 | 1.05 | 0.94 | 1.00 | 0.06 | 4  | 12.1 | 1.99E-58 |
| IPI00168878 | Luminal domain-like LAP1                                                                                                 | Q8NFAQ8  |      |      | 1.12 | 1.12 |      | 4  | 11.3 | 8.2E-120 |
| IPI00168884 | ATPase H(+)-transporting lysosomal accessory protein 2                                                                   | Q75787   | 0.92 | 1.39 | 1.64 | 1.32 | 0.37 | 4  | 15.7 | 2.6E-182 |
| IPI00168885 | DEAH box protein 57                                                                                                      | Q6P158-1 | 1.12 | 0.99 | 1.14 | 1.08 | 0.08 | 5  | 5.1  | 5.61E-19 |
| IPI00169259 | Small VCP/p97-interacting protein                                                                                        | Q8NHG7   | 1.28 | 1.16 | 1.21 | 1.22 | 0.06 | 2  | 32.5 | 3.57E-32 |
| IPI00169267 | ADP-ribosylation factor-like protein 6-interacting protein 2                                                             | Q8NHH9-1 | 1.21 | 1.06 | 0.88 | 1.05 | 0.16 | 3  | 6    | 1.21E-05 |
| IPI00169285 | 76 kDa protein                                                                                                           | Q8NHP8   | 1.07 | 1.03 | 1.15 | 1.08 | 0.06 | 6  | 11   | 2.33E-45 |
| IPI00169325 | T-cell activation WD repeat-containing protein                                                                           | Q8NI36   | 0.86 | 0.90 | 0.88 | 0.88 | 0.02 | 12 | 15.2 | 9.9E-148 |
| IPI00169383 | Cell migration-inducing gene 10 protein                                                                                  | P00558   | 1.07 | 1.08 | 1.04 | 1.06 | 0.02 | 37 | 83.2 | 0        |
| IPI00169400 | 28S ribosomal protein S5, mitochondrial                                                                                  | P82675-1 | 0.91 | 0.94 | 0.95 | 0.93 | 0.02 | 5  | 16.3 | 2.83E-53 |
| IPI00170692 | 33 kDa VAMP-associated protein                                                                                           | Q9P0L0   |      | 1.11 |      | 1.11 |      | 10 | 41   | 2.22E-81 |
| IPI00170770 | PHD finger protein 3                                                                                                     | Q92576-1 |      |      | 1.09 | 1.09 |      | 2  | 1.9  | 2.17E-51 |
| IPI00170778 | Formin-binding protein 30                                                                                                | Q8N3X1   | 1.11 |      |      | 1.11 |      | 1  | 1.5  | 0.00196  |
| IPI00170786 | Npw38-binding protein                                                                                                    | Q9Y2W2   | 1.37 | 0.97 | 1.11 | 1.15 | 0.20 | 10 | 15.3 | 5.11E-36 |
| IPI00170862 | Androgen receptor trapped clone 27 protein                                                                               | Q9UBK9   |      |      | 1.13 | 1.13 |      | 2  | 14.2 | 1.26E-46 |
| IPI00170877 | cDNA FLJ45232 fis, clone BRCAN2021718, highly similar to Homo sapiens mitochondrial ribosomal protein L10 (MRPL10), mRNA | A6NGJ4   |      |      | 0.84 | 0.84 |      | 2  | 10.7 | 1.35E-40 |
| IPI00170924 | Histidine triad nucleotide-binding protein 3                                                                             | Q9NQE9   | 0.91 | 1.20 | 1.32 | 1.14 | 0.21 | 3  | 21.4 | 6.32E-83 |
| IPI00170935 | Leucine-rich repeat-containing protein 47                                                                                | Q8N1G4   | 1.06 | 1.07 | 1.02 | 1.05 | 0.03 | 19 | 44.4 | 0        |
| IPI00170972 | UPF0553 protein C9orf64                                                                                                  | Q5T6V5   | 0.95 |      | 1.03 | 0.99 | 0.05 | 4  | 12   | 2.61E-14 |
| IPI00171044 | Schlafen family member 11                                                                                                | Q7Z7L1   | 1.27 | 1.21 | 1.18 | 1.22 | 0.05 | 5  | 8.3  | 5.02E-92 |
| IPI00171117 | COMM domain-containing protein 1                                                                                         | Q8N668   | 0.96 | 1.00 | 1.16 | 1.04 | 0.11 | 5  | 29.5 | 1.38E-49 |
| IPI00171123 | GATA zinc finger domain-containing protein 1                                                                             | Q8WUU5   | 1.07 |      | 1.28 | 1.18 | 0.15 | 1  | 6.7  | 3.09E-14 |
| IPI00171127 | Ubiquitin-associated protein 2                                                                                           | Q5T6F2   | 1.23 | 1.03 | 0.78 | 1.01 | 0.22 | 9  | 11.6 | 1.1E-39  |
| IPI00171134 | Akt phosphorylation enhancer                                                                                             | Q3V6T2-1 | 0.91 |      |      | 0.91 |      | 3  | 1.8  | 1.64E-24 |
| IPI00171176 | Pantothenate kinase 2, mitochondrial                                                                                     | Q9BZ23-1 | 1.02 | 1.28 | 1.02 | 1.11 | 0.15 | 2  | 5.6  | 2.11E-52 |
| IPI00171390 | Pre-mRNA-splicing factor 38A                                                                                             | Q8NAV1-1 | 1.04 | 1.17 | 0.95 | 1.06 | 0.11 | 5  | 17.9 | 6.57E-25 |
| IPI00171421 | Mesenchymal stem cell protein DSCD75                                                                                     | Q8WUY1   | 1.22 | 1.44 | 1.38 | 1.35 | 0.11 | 4  | 18.8 | 3.43E-30 |
| IPI00171438 | Endoplasmic reticulum resident protein 46                                                                                | Q8NBS9   | 1.15 | 1.10 | 1.19 | 1.15 | 0.04 | 20 | 50.9 | 0        |

|             |                                                                             |          |      |      |      |      |      |    |      |          |
|-------------|-----------------------------------------------------------------------------|----------|------|------|------|------|------|----|------|----------|
| IPI00171475 | 45 kDa NF-AT-interacting protein                                            | Q8NCF5-1 | 1.34 | 1.17 | 0.93 | 1.15 | 0.20 | 3  | 13.1 | 5.41E-74 |
| IPI00171525 | Sentrin/SUMO-specific protease SENP3                                        | Q9H4L4   |      |      | 1.14 | 1.14 |      | 2  | 5.6  | 8.97E-18 |
| IPI00171573 | Coiled-coil domain-containing protein 109A                                  | Q8NE86-1 | 1.03 | 0.97 | 1.31 | 1.11 | 0.18 | 4  | 14   | 3.97E-58 |
| IPI00171626 | 1-acylglycerophosphocholine O-acyltransferase                               | Q8NF37   | 1.44 | 1.05 | 1.00 | 1.16 | 0.24 | 3  | 9.6  | 4.73E-87 |
| IPI00171665 | Nucleoporin Nup37                                                           | Q8NFH4   | 0.74 | 0.94 | 0.91 | 0.87 | 0.11 | 6  | 19.6 | 4.5E-119 |
| IPI00171692 | Abhydrolase domain-containing protein 11                                    | Q8NFV4-1 | 1.06 | 0.92 | 0.84 | 0.94 | 0.11 | 8  | 26.3 | 1.8E-75  |
| IPI00171712 | Leucine carboxyl methyltransferase 2                                        | O60294   |      | 1.07 | 0.82 | 0.95 | 0.18 | 2  | 4.7  | 6.63E-71 |
| IPI00171769 | Cervical cancer proto-oncogene 3 protein                                    | Q9BWH2   | 0.70 | 0.84 | 0.86 | 0.80 | 0.09 | 3  | 17.5 | 2.49E-40 |
| IPI00171798 | Metastasis-associated 1-like 1                                              | O94776   | 0.93 | 1.10 | 1.11 | 1.05 | 0.10 | 25 | 41.3 | 0        |
| IPI00171844 | COP9 signalosome complex subunit 4                                          | Q9BT78   | 0.98 | 1.05 | 1.03 | 1.02 | 0.03 | 20 | 60.1 | 0        |
| IPI00171856 | Deoxyhypusine dioxygenase                                                   | Q9BU89   | 0.83 | 0.95 | 1.00 | 0.93 | 0.09 | 7  | 38.4 | 5.9E-103 |
| IPI00171903 | Heterogeneous nuclear ribonucleoprotein M                                   | P52272-1 | 1.02 | 1.05 | 1.06 | 1.04 | 0.02 | 39 | 54.7 | 7.8E-277 |
| IPI00172513 | Adapter protein containing PH domain, PTB domain and leucine zipper motif 2 | Q8NEU8   | 1.22 | 1.40 | 1.43 | 1.35 | 0.11 | 6  | 12.8 | 2.99E-45 |
| IPI00172580 | Nucleoporin 54kDa variant                                                   | Q53H29   | 0.91 | 0.90 | 1.04 | 0.95 | 0.07 | 7  | 18.9 | 1.5E-170 |
| IPI00172591 | 39S ribosomal protein L17, mitochondrial                                    | Q9NRX2   | 0.94 | 1.03 | 0.90 | 0.96 | 0.07 | 6  | 34.9 | 7E-78    |
| IPI00172594 | 39S ribosomal protein L28, mitochondrial                                    | Q13084   | 0.88 | 0.91 | 0.83 | 0.87 | 0.04 | 6  | 29.7 | 1.13E-25 |
| IPI00172656 | FAS-associated factor 2                                                     | Q96CS3   | 1.01 | 0.97 | 0.96 | 0.98 | 0.03 | 11 | 35.1 | 3E-113   |
| IPI00173359 | Uveal autoantigen with coiled-coil domains and ankyrin repeats              | Q9BZF9   |      | 1.72 | 0.82 | 1.27 | 0.63 | 1  | 0.8  | 1.68E-38 |
| IPI00173589 | Similar to ribosomal protein L29                                            |          |      |      | 0.82 | 0.82 |      | 3  | 20.6 | 1.29E-38 |
| IPI00173946 | Protein TANC1                                                               | Q9C0D5-1 | 1.00 | 1.04 | 1.25 | 1.10 | 0.13 | 2  | 1.9  | 0.000266 |
| IPI00174025 | Dynamin-binding protein                                                     | Q6XZF7-1 |      | 0.66 | 0.99 | 0.83 | 0.23 | 4  | 2.4  | 2.54E-07 |
| IPI00174190 | Phosphoinositide lipid phosphatase                                          | Q8WUK0-1 | 1.03 | 0.92 | 1.09 | 1.01 | 0.09 | 4  | 19.4 | 6.54E-09 |
| IPI00174390 | 2,5-phosphodiesterase 12                                                    | Q6L8Q7-1 | 0.92 | 1.04 | 0.96 | 0.98 | 0.06 | 8  | 23   | 9.2E-154 |
| IPI00174442 | Protein FAM98A                                                              | Q8NCA5   | 0.82 | 0.99 | 0.94 | 0.92 | 0.09 | 6  | 17   | 4.3E-139 |
| IPI00174852 | Mediator complex subunit 20                                                 | Q9H944   | 0.98 | 1.14 | 1.26 | 1.13 | 0.14 | 3  | 22.6 | 8.57E-16 |
| IPI00174962 | MICAL-like protein 1                                                        | Q8N3F8   | 1.15 | 1.00 | 0.87 | 1.01 | 0.14 | 4  | 5.9  | 6.88E-49 |
| IPI00174976 | MAGUK p55 subfamily member 5                                                | Q8N3R9-1 |      |      | 1.29 | 1.29 |      | 1  | 1.8  | 1.03E-22 |
| IPI00175029 | PtdIns-4,5-P2 4-Ptase II                                                    | Q8N4L2   |      | 1.18 | 1.57 | 1.37 | 0.28 | 2  | 14.4 | 1.72E-18 |
| IPI00175096 | Tetratricopeptide repeat protein 9C                                         | Q8N5M4   | 0.91 | 0.99 | 0.99 | 0.96 | 0.05 | 6  | 35.1 | 3.15E-73 |

|             |                                                                  |          |      |      |      |      |      |     |      |          |
|-------------|------------------------------------------------------------------|----------|------|------|------|------|------|-----|------|----------|
| IPI00175136 | One-twenty two protein 3                                         | Q8NDT2   |      |      | 1.06 | 1.06 |      | 2   | 4    | 8.86E-09 |
| IPI00175202 | Zinc finger protein 433                                          | Q8N7K0-1 |      |      | 1.05 | 1.05 |      | 2   | 10.8 | 0.00332  |
| IPI00176193 | Collagen alpha-1(XIV) chain                                      | Q05707-1 | 6.50 | 0.15 |      | 3.33 | 4.49 | 2   | 1.3  | 2.07E-59 |
| IPI00176706 | 45 kDa-splicing factor                                           | Q96I25   | 1.08 | 1.14 | 0.81 | 1.01 | 0.18 | 6   | 14.5 | 2.7E-50  |
| IPI00176903 | Cavin-1                                                          | Q6NZI2-1 | 1.18 | 1.13 | 1.13 | 1.15 | 0.03 | 18  | 36.9 | 0        |
| IPI00177008 | Phosphoglycolate phosphatase                                     | A6NDG6   | 1.00 | 1.20 | 1.01 | 1.07 | 0.11 | 7   | 25.5 | 1.52E-65 |
| IPI00177428 | Coiled-coil-helix-coiled-coil-helix domain-containing protein 4  | Q8N4Q1-2 | 1.30 |      | 0.68 | 0.99 | 0.44 | 2   | 21.3 | 1.23E-36 |
| IPI00177437 | Crooked neck homolog                                             | Q9BZJ0-1 | 1.09 | 1.34 | 1.31 | 1.25 | 0.13 | 15  | 17.6 | 2.3E-161 |
| IPI00177509 | Trafficking protein particle complex subunit 5                   | Q8IURO   | 0.92 | 0.98 | 1.03 | 0.98 | 0.05 | 4   | 21.3 | 2.56E-55 |
| IPI00177728 | CNDP dipeptidase 2                                               | Q96KP4-1 | 1.06 | 1.05 | 1.06 | 1.06 | 0.01 | 12  | 36   | 6E-115   |
| IPI00177808 | Bcl10-interacting CARD protein                                   | Q96LW7-2 | 1.03 | 1.09 | 1.05 | 1.06 | 0.03 | 5   | 35   | 6.48E-55 |
| IPI00177856 | tRNA (adenine-N(1)-)-methyltransferase catalytic subunit TRMT61A | Q96FX7-2 | 0.76 | 0.97 | 0.87 | 0.87 | 0.10 | 3   | 17.5 | 4.78E-36 |
| IPI00177965 | 5-nucleotidase domain-containing protein 1                       | Q5TFE4   | 0.99 | 1.31 | 1.08 | 1.13 | 0.17 | 4   | 12.1 | 2.35E-82 |
| IPI00178072 | Cytospin-A                                                       | Q69YQ0   |      | 1.00 | 0.90 | 0.95 | 0.07 | 3   | 4    | 4.85E-06 |
| IPI00178150 | Chromokinesin-A                                                  | O95239-1 | 0.83 | 1.16 | 1.12 | 1.04 | 0.18 | 26  | 23.7 | 7.4E-208 |
| IPI00178203 | Protein CTF18 homolog.                                           | Q96S08   | 1.00 |      |      | 1.00 |      | 4   | 5.1  | 7.92E-77 |
| IPI00178314 | Amisyn                                                           | Q8NFX7-1 | 0.58 | 0.66 | 0.64 | 0.63 | 0.04 | 7   | 34.3 | 1.07E-84 |
| IPI00178352 | ABP-280-like protein                                             | Q14315-1 | 0.76 | 0.80 | 0.80 | 0.79 | 0.02 | 123 | 55   | 0        |
| IPI00178431 | ATP-dependent DNA helicase Q1                                    | P46063   | 1.03 | 1.22 | 1.17 | 1.14 | 0.10 | 23  | 41   | 6.9E-196 |
| IPI00178440 | Elongation factor 1-beta                                         | P24534   | 0.94 | 0.79 | 0.81 | 0.85 | 0.08 | 11  | 58.7 | 0        |
| IPI00178743 | Alstrom syndrome protein 1                                       | Q8TCU4-1 |      | 0.78 |      | 0.78 |      | 2   | 0.6  | 0.017197 |
| IPI00178750 | NEFA-interacting nuclear protein NIP30                           | Q9GZU8   | 1.00 | 0.98 | 0.79 | 0.92 | 0.12 | 4   | 24   | 5.4E-154 |
| IPI00178899 | Cyclin-A/CDK2-associated protein p45                             | Q13309-1 |      |      | 1.47 | 1.47 |      | 3   | 10.1 | 3.47E-16 |
| IPI00179026 | Malignant T cell-amplified sequence 1                            | Q9ULC4-1 | 0.95 | 1.08 | 1.02 | 1.02 | 0.06 | 9   | 49.2 | 1.1E-129 |
| IPI00179172 | hSGT2                                                            | Q86W92-2 |      | 1.08 |      | 1.08 |      | 6   | 7.3  | 1.21E-23 |
| IPI00179298 | ARF-binding protein 1                                            | Q7Z6Z7-1 | 0.87 | 0.92 | 0.94 | 0.91 | 0.03 | 30  | 11.3 | 0        |
| IPI00179330 | 40S ribosomal protein S27a                                       | P62979   | 1.11 | 0.88 | 1.13 | 1.04 | 0.14 | 14  | 69.9 | 0        |
| IPI00179415 | Calmodulin-dependent calcineurin A subunit alpha isoform         | Q08209-1 | 1.11 | 1.20 | 1.01 | 1.10 | 0.09 | 13  | 27.1 | 1.83E-52 |

|             |                                                                  |          |      |      |      |      |      |    |      |          |
|-------------|------------------------------------------------------------------|----------|------|------|------|------|------|----|------|----------|
| IPI00179437 | 114 kDa Rho-specific guanine nucleotide exchange factor          | Q6ZSZ5-1 | 1.08 | 1.22 | 1.09 | 1.13 | 0.08 | 5  | 7.4  | 2.18E-32 |
| IPI00179438 | Differentially-expressed protein 2                               | P98082-1 | 1.00 | 0.89 | 1.05 | 0.98 | 0.08 | 7  | 15.3 | 1.27E-27 |
| IPI00179473 | EBI3-associated protein of 60 kDa                                | Q13501-1 | 1.02 | 1.32 | 1.26 | 1.20 | 0.16 | 9  | 27.5 | 2.7E-230 |
| IPI00179589 | Myotrophin                                                       | P58546   |      | 1.00 | 1.16 | 1.08 | 0.11 | 3  | 23.1 | 3.17E-97 |
| IPI00179700 | High mobility group AT-hook protein 1                            | P17096-1 | 1.48 |      | 0.94 | 1.21 | 0.39 | 5  | 56.1 | 8.02E-35 |
| IPI00179713 | Hepatocellular carcinoma autoantigen p62                         | Q9Y6M1-2 | 1.24 | 1.00 | 1.04 | 1.09 | 0.13 | 18 | 37.4 | 2.6E-304 |
| IPI00179953 | Nuclear autoantigenic sperm protein                              | P49321-1 |      |      | 1.09 | 1.09 |      | 22 | 46.4 | 0        |
| IPI00180154 | Ataxin-2                                                         | Q99700-1 | 1.11 | 1.00 | 0.88 | 1.00 | 0.11 | 7  | 7.8  | 1.7E-101 |
| IPI00180267 | Protein INM01                                                    | Q86YL5   |      | 0.85 | 1.13 | 0.99 | 0.19 | 3  | 13.6 | 2.11E-12 |
| IPI00180404 | F-actin-binding protein                                          | Q0ZGT2-1 | 1.03 | 1.11 | 1.11 | 1.08 | 0.05 | 3  | 4.3  | 3.66E-06 |
| IPI00180454 | Probable U3 small nucleolar RNA-associated protein 11            | Q9Y3A2   | 0.81 | 0.91 | 0.92 | 0.88 | 0.06 | 5  | 23.3 | 8.52E-14 |
| IPI00180675 | Alpha-tubulin 3                                                  | Q71U36   | 1.86 | 1.41 | 1.77 | 1.68 | 0.24 | 31 | 74.5 | 0        |
| IPI00180954 | A18 hnRNP                                                        | Q14011   | 1.15 | 1.22 | 1.24 | 1.20 | 0.05 | 8  | 42.4 | 9.8E-90  |
| IPI00180956 | Putative uncharacterized protein ENSP00000382160                 | A8MW45   |      | 0.79 |      | 0.79 |      | 5  | 12.7 | 1.7E-103 |
| IPI00181116 | Brix domain-containing protein 4                                 | Q96G21   | 0.93 | 0.83 | 1.12 | 0.96 | 0.15 | 5  | 15.5 | 1.2E-120 |
| IPI00181617 | RNA-binding motif protein 34                                     | P42696-1 | 0.96 | 0.99 | 0.96 | 0.97 | 0.01 | 6  | 19.5 | 1E-125   |
| IPI00181728 | Brix domain-containing protein 2                                 | Q8TDN6   | 0.87 | 0.99 | 0.94 | 0.94 | 0.06 | 8  | 28   | 4.1E-24  |
| IPI00182180 | DUBA-5                                                           | Q8N6M0   | 0.85 | 1.76 | 0.99 | 1.20 | 0.49 | 4  | 16.1 | 2.71E-43 |
| IPI00182289 | 40S ribosomal protein S29                                        | P62273   | 0.76 |      | 0.74 | 0.75 | 0.01 | 3  | 46.4 | 0.000581 |
| IPI00182373 | Procollagen-proline,2-oxoglutarate-4-dioxygenase subunit alpha-2 | O15460-2 | 1.28 | 1.09 | 1.14 | 1.17 | 0.10 | 19 | 45.8 | 0        |
| IPI00182533 | 60S ribosomal protein L28                                        | P46779   | 0.91 | 0.95 | 0.91 | 0.92 | 0.03 | 12 | 51.8 | 2.1E-84  |
| IPI00182728 | Cell migration-inducing gene 1 protein                           | O75351   | 1.14 | 1.17 | 1.09 | 1.13 | 0.04 | 8  | 23.2 | 1.27E-50 |
| IPI00182757 | Deleted in breast cancer gene 1 protein                          | Q8N163-1 | 1.15 | 1.11 | 1.08 | 1.12 | 0.04 | 28 | 44   | 0        |
| IPI00182933 | Cytochrome b5                                                    | P00167-2 |      | 0.97 |      | 0.97 |      | 4  | 56.1 | 1.38E-78 |
| IPI00183002 | Myosin phosphatase-targeting subunit 1                           | O14974-1 | 0.94 | 1.02 | 1.00 | 0.99 | 0.04 | 30 | 30.7 | 0        |
| IPI00183018 | Protein MICAL-2                                                  | O94851-1 | 0.78 |      |      | 0.78 |      | 3  | 3.6  | 3.18E-06 |
| IPI00183208 | F-box only protein 22                                            | Q8NEZ5-1 | 0.80 |      |      | 0.80 |      | 4  | 11.9 | 5.87E-65 |
| IPI00183500 | 20 kDa nuclear cap-binding protein                               | P52298-1 | 0.99 | 1.36 | 1.24 | 1.19 | 0.19 | 6  | 33.3 | 5.43E-61 |

|             |                                                             |          |      |      |      |      |      |    |      |          |
|-------------|-------------------------------------------------------------|----------|------|------|------|------|------|----|------|----------|
| IPI00183508 | Protein A6                                                  | Q12792-2 | 0.90 | 1.08 | 1.05 | 1.01 | 0.10 | 10 | 28.4 | 9.5E-262 |
| IPI00183603 | Hydrophobic protein HSF-28                                  | Q9NRPO   | 0.98 | 0.95 | 1.15 | 1.03 | 0.11 | 1  | 8.1  | 3.77E-07 |
| IPI00183626 | Polypyrimidine tract binding protein 1                      | Q9BUQ0   | 1.01 | 0.99 | 1.03 | 1.01 | 0.02 | 16 | 41.8 | 0        |
| IPI00183642 | Suppressor of hairy wing homolog 3                          | Q8ND82   |      | 1.66 |      | 1.66 |      | 1  | 2.2  | 7.54E-09 |
| IPI00183695 | Calpactin I light chain                                     | P60903   | 1.13 | 1.31 | 1.33 | 1.26 | 0.11 | 10 | 49.5 | 3.7E-150 |
| IPI00183938 | Tetratricopeptide repeat protein 27                         | Q6P3X3   | 0.80 | 0.99 | 0.77 | 0.86 | 0.12 | 3  | 6.5  | 1.64E-15 |
| IPI00184363 | Glycolipid transfer protein                                 | Q9NZD2   | 0.86 | 1.15 | 1.05 | 1.02 | 0.15 | 4  | 19.1 | 2.28E-36 |
| IPI00184477 | Domain E                                                    | Q9NQX3-2 | 0.88 |      |      | 0.88 |      | 5  | 7.4  | 5.02E-09 |
| IPI00184533 | Deubiquitinating enzyme 11                                  | P51784   | 0.72 | 1.35 | 1.19 | 1.09 | 0.32 | 5  | 7.3  | 1.22E-16 |
| IPI00184546 | UPF0444 transmembrane protein C12orf23                      | Q8WUH6   | 0.94 | 0.99 | 1.05 | 0.99 | 0.05 | 3  | 44   | 1.81E-21 |
| IPI00184871 | Uncharacterized protein C6orf130                            | Q9Y530   |      |      | 1.63 | 1.63 |      | 2  | 15.8 | 6.14E-05 |
| IPI00184884 | Non-structural maintenance of chromosomes element 1 homolog | Q8WV22   |      | 0.85 | 1.01 | 0.93 | 0.12 | 2  | 12   | 5.91E-19 |
| IPI00185146 | Importin-9                                                  | Q96P70   | 1.00 | 1.10 | 1.13 | 1.08 | 0.07 | 23 | 27.3 | 0        |
| IPI00185374 | 26S proteasome non-ATPase regulatory subunit 12             | O00232   | 0.95 | 1.04 | 1.04 | 1.01 | 0.05 | 24 | 49.6 | 5E-297   |
| IPI00185919 | La ribonucleoprotein domain family member 1                 | Q6PKG0-1 |      | 1.02 | 1.00 | 1.01 | 0.02 | 22 | 29.8 | 3.9E-118 |
| IPI00186139 | Protein KRI1 homolog                                        | Q8N9T8-2 | 1.24 |      |      | 1.24 |      | 8  | 16.3 | 4E-135   |
| IPI00186194 | Centrosomal protein of 170 kDa                              | Q55W79-1 |      | 1.01 | 0.88 | 0.95 | 0.09 | 11 | 8.6  | 1.68E-42 |
| IPI00186290 | Elongation factor 2                                         | P13639   | 0.72 | 0.80 | 0.76 | 0.76 | 0.04 | 62 | 70.3 | 0        |
| IPI00186721 | CFTR-associated ligand                                      | Q9HD26-1 | 0.63 | 0.96 | 0.98 | 0.86 | 0.20 | 5  | 13.6 | 1.45E-18 |
| IPI00186966 | Amphiphysin II                                              | O00499-1 | 1.59 | 1.04 | 1.08 | 1.24 | 0.31 | 6  | 14.2 | 7.1E-94  |
| IPI00187011 | Zinc finger CCCH domain-containing protein 4                | Q9UPT8   | 1.39 | 1.04 | 1.06 | 1.16 | 0.20 | 8  | 11.9 | 2.25E-63 |
| IPI00215610 | 55 kDa erythrocyte membrane protein                         | Q00013   | 2.30 | 1.16 | 1.10 | 1.52 | 0.67 | 3  | 11.8 | 3.7E-30  |
| IPI00215637 | ATP-dependent RNA helicase DDX3X                            | O00571   | 0.73 | 0.92 | 0.91 | 0.85 | 0.11 | 32 | 56   | 0        |
| IPI00215687 | Glutaminase kidney isoform, mitochondrial                   | O94925-3 | 0.75 | 0.86 | 0.92 | 0.84 | 0.08 | 18 | 35.5 | 0        |
| IPI00215704 | BCL2/adenovirus E1B 19 kDa protein-interacting protein 1    | Q12981-4 | 0.85 |      |      | 0.85 |      | 4  | 19.7 | 1.59E-19 |
| IPI00215719 | 60S ribosomal protein L18                                   | Q07020   | 0.87 | 0.81 | 0.92 | 0.87 | 0.05 | 12 | 52.1 | 1.3E-205 |
| IPI00215777 | Phosphate carrier protein, mitochondrial                    | Q00325-2 |      |      | 1.03 | 1.03 |      | 11 | 31.9 | 8.98E-51 |
| IPI00215780 | 40S ribosomal protein S19                                   | P39019   | 0.91 | 0.88 | 0.90 | 0.90 | 0.02 | 13 | 57.9 | 1.03E-93 |



|             |                                                     |          |      |      |      |      |      |    |      |          |
|-------------|-----------------------------------------------------|----------|------|------|------|------|------|----|------|----------|
| IPI00215790 | 60S ribosomal protein L38                           | P63173   | 0.72 | 0.90 | 0.89 | 0.84 | 0.10 | 7  | 50   | 3.09E-82 |
| IPI00215878 | ATP synthase subunit epsilon, mitochondrial         | P56381   | 0.81 | 0.98 |      | 0.89 | 0.12 | 2  | 29.4 | 0.004583 |
| IPI00215884 | Alternative-splicing factor 1                       | Q07955-1 | 1.17 | 0.87 | 0.89 | 0.98 | 0.17 | 21 | 62.5 | 1.1E-150 |
| IPI00215888 | Signal recognition particle 72 kDa protein          | O76094   | 0.91 | 1.07 | 1.02 | 1.00 | 0.08 | 23 | 35.9 | 0        |
| IPI00215890 | Zinc finger protein 22                              | P17026   |      | 1.19 |      | 1.19 |      | 2  | 13.4 | 0.000269 |
| IPI00215893 | Heme oxygenase 1                                    | P09601   |      | 1.37 | 1.31 | 1.34 | 0.05 | 4  | 18.1 | 8.01E-29 |
| IPI00215901 | Adenylate kinase 2, mitochondrial                   | P54819-1 | 0.99 | 0.81 | 0.80 | 0.87 | 0.11 | 11 | 56.5 | 2.6E-120 |
| IPI00215911 | APEX nuclease                                       | P27695   | 0.91 | 0.99 | 0.96 | 0.95 | 0.04 | 18 | 53.5 | 0        |
| IPI00215914 | ADP-ribosylation factor 1                           | P84077   | 1.10 | 1.14 | 1.14 | 1.13 | 0.03 | 11 | 53   | 3.1E-250 |
| IPI00215918 | ADP-ribosylation factor 4                           | P18085   | 0.91 | 1.04 | 1.05 | 1.00 | 0.08 | 10 | 54.4 | 1.5E-117 |
| IPI00215919 | ADP-ribosylation factor 5                           | P84085   | 1.07 | 1.29 |      | 1.18 | 0.15 | 6  | 37.2 | 9.8E-75  |
| IPI00215920 | ADP-ribosylation factor 6                           | P62330   | 1.05 | 1.22 | 1.14 | 1.14 | 0.08 | 7  | 43.4 | 2.31E-62 |
| IPI00215928 | Caltractin isoform 1                                | P41208   | 1.28 |      |      | 1.28 |      | 2  | 11   | 0.001602 |
| IPI00215948 | Alpha E-catenin                                     | P35221-1 | 0.92 | 1.17 | 1.13 | 1.07 | 0.14 | 40 | 58.1 | 0        |
| IPI00215965 | Helix-destabilizing protein                         | P09651-1 | 0.95 | 0.95 | 0.93 | 0.94 | 0.01 | 28 | 67.5 | 0        |
| IPI00215974 | Guanine insertion enzyme                            | Q9BXR0   | 0.98 | 0.92 | 0.84 | 0.91 | 0.07 | 5  | 20.6 | 7.34E-84 |
| IPI00215979 | 2,3-bisphosphoglycerate mutase, erythrocyte         | P07738   |      | 0.99 |      | 0.99 |      | 2  | 11.2 | 2.05E-19 |
| IPI00215995 | CD49 antigen-like family member C                   | P26006-2 | 1.04 | 1.20 | 1.36 | 1.20 | 0.16 | 8  | 7.7  | 1.91E-58 |
| IPI00215997 | CD9 antigen                                         | P21926   | 1.83 | 1.25 | 1.35 | 1.48 | 0.31 | 3  | 14.5 | 1.48E-79 |
| IPI00216003 | Cullin-5                                            | Q93034   | 0.90 | 1.20 | 1.22 | 1.11 | 0.18 | 4  | 6.5  | 2.17E-78 |
| IPI00216008 | Glucose-6-phosphate 1-dehydrogenase                 | P11413-2 | 1.12 | 1.34 | 1.46 | 1.31 | 0.17 | 23 | 42.6 | 4.9E-260 |
| IPI00216047 | BRG1-associated factor 170                          | Q8TAQ2-1 | 0.98 | 1.15 | 1.32 | 1.15 | 0.17 | 11 | 10.4 | 3.2E-288 |
| IPI00216048 | Phosphatidylinositol transfer protein alpha isoform | Q00169   |      | 0.87 | 1.04 | 0.95 | 0.12 | 8  | 31.1 | 1.39E-53 |
| IPI00216057 | L-iditol 2-dehydrogenase                            | Q00796   | 0.88 | 1.08 | 0.96 | 0.98 | 0.10 | 10 | 33.9 | 1.34E-87 |
| IPI00216088 | Cellular retinoic acid-binding protein 2            | P29373   | 1.53 | 1.44 | 1.51 | 1.49 | 0.05 | 3  | 23.9 | 5.48E-17 |
| IPI00216135 | Alpha-tropomyosin                                   | P09493-3 | 0.54 | 0.65 | 0.74 | 0.64 | 0.10 | 31 | 63   | 0        |
| IPI00216138 | 22 kDa actin-binding protein                        | Q01995   | 0.58 | 0.95 | 1.02 | 0.85 | 0.24 | 29 | 88.6 | 0        |
| IPI00216159 | D-fructose-6-phosphate amidotransferase 2           | O94808   | 1.85 | 0.60 | 0.55 | 1.00 | 0.74 | 5  | 6.9  | 2.1E-141 |
| IPI00216171 | 2-phospho-D-glycerate hydro-lyase                   | P09104   | 1.17 | 1.08 | 1.16 | 1.14 | 0.05 | 14 | 46.1 | 0        |
| IPI00216172 | Lysosomal-associated membrane protein 2,            | Q6Q3G8   | 1.39 | 1.13 | 1.48 | 1.33 | 0.18 | 4  | 8.8  | 9.26E-25 |

|             | isoform CRA_b                                      |          |      |      |      |      |      |    |      |          |  |
|-------------|----------------------------------------------------|----------|------|------|------|------|------|----|------|----------|--|
| IPI00216190 | Glycogen synthase kinase-3 beta                    | P49841-2 | 0.97 | 1.10 | 1.10 | 1.06 | 0.07 | 7  | 26.1 | 2.7E-208 |  |
| IPI00216219 | Tight junction protein 1                           | Q07157-1 | 0.98 |      | 1.13 | 1.05 | 0.11 | 25 | 19.6 | 1E-183   |  |
| IPI00216225 | CD49 antigen-like family member F                  | P23229-6 | 1.19 | 0.90 | 0.97 | 1.02 | 0.16 | 8  | 9.2  | 8.2E-180 |  |
| IPI00216230 | Lamina-associated polypeptide 2, isoform alpha     | P42166   | 1.31 | 1.20 | 1.20 | 1.23 | 0.06 | 33 | 65   | 0        |  |
| IPI00216237 | 60S ribosomal protein L36                          | Q9Y3U8   | 0.92 | 0.87 | 0.79 | 0.86 | 0.06 | 6  | 33.3 | 1.03E-78 |  |
| IPI00216260 | Elongation factor Ts, mitochondrial                | P43897-2 | 0.97 | 1.02 | 1.05 | 1.02 | 0.04 | 7  | 26.9 | 3.42E-82 |  |
| IPI00216293 | Rhodanese                                          | Q16762   | 1.09 | 1.25 | 1.61 | 1.32 | 0.26 | 4  | 20.5 | 1.02E-39 |  |
| IPI00216298 | ATL-derived factor                                 | P10599   | 0.88 | 1.13 | 1.12 | 1.04 | 0.14 | 8  | 48.6 | 2.9E-111 |  |
| IPI00216308 | Outer mitochondrial membrane protein porin 1       | P21796   | 1.10 | 1.02 | 1.06 | 1.06 | 0.04 | 14 | 62.2 | 0        |  |
| IPI00216318 | 14-3-3 protein beta/alpha                          | P31946-1 | 1.03 | 1.06 | 1.04 | 1.04 | 0.01 | 22 | 71.1 | 0        |  |
| IPI00216319 | 14-3-3 protein eta                                 | Q04917   | 0.99 | 1.15 | 1.18 | 1.11 | 0.10 | 21 | 69.9 | 0        |  |
| IPI00216456 | Histone H2A type 1-C                               | Q93077   | 1.08 |      |      | 1.08 |      | 7  | 46.2 | 4.7E-297 |  |
| IPI00216461 | Acylphosphatase, muscle type isozyme               | P14621   |      | 1.04 |      | 1.04 |      | 2  | 17.3 | 3.37E-16 |  |
| IPI00216470 | 1-phosphatidylinositol-5-phosphate 4-kinase 2-beta | P78356-1 | 1.17 | 1.41 | 1.15 | 1.24 | 0.15 | 2  | 6    | 4.4E-148 |  |
| IPI00216520 | ADP-ribosylation factor-interacting protein 1      | P53367-2 |      | 1.19 |      | 1.19 |      | 5  | 23.8 | 2.14E-64 |  |
| IPI00216587 | 40S ribosomal protein S8                           | P62241   | 0.89 | 0.86 | 0.88 | 0.87 | 0.01 | 15 | 60.1 | 0        |  |
| IPI00216592 | Heterogeneous nuclear ribonucleoproteins C1/C2     | P07910-2 |      | 1.03 | 1.03 | 1.03 | 0.00 | 23 | 60.8 | 0        |  |
| IPI00216654 | 140 kDa nucleolar phosphoprotein                   | Q14978-2 | 1.21 | 0.99 |      | 1.10 | 0.16 | 7  | 10.2 | 1.99E-21 |  |
| IPI00216659 | Binder of OVCA1-1                                  | Q9Y5S9-2 |      | 1.15 |      | 1.15 |      | 7  | 31.8 | 4.3E-125 |  |
| IPI00216674 | Apoptotic protease Mch-3                           | P55210-2 |      | 0.73 |      | 0.73 |      | 2  | 7.5  | 0.00365  |  |
| IPI00216682 | Calponin, acidic isoform                           | Q15417   | 1.01 | 1.12 | 1.02 | 1.05 | 0.06 | 13 | 43.5 | 0        |  |
| IPI00216691 | Profilin I                                         | P07737   | 0.88 | 1.09 | 1.03 | 1.00 | 0.11 | 16 | 78.6 | 0        |  |
| IPI00216694 | Plastin-3                                          | P13797   | 0.82 | 1.08 | 1.11 | 1.00 | 0.16 | 32 | 55.6 | 0        |  |
| IPI00216719 | ELKS/Rab6-interacting/CAST family member 1         | Q8IUD2-1 | 1.13 | 1.00 | 1.01 | 1.05 | 0.07 | 11 | 14   | 2.13E-94 |  |
| IPI00216730 | Histone H2A type 2-B                               | Q8IUE6   |      |      | 1.48 | 1.48 |      | 3  | 30   | 4.13E-09 |  |
| IPI00216737 | Mineral dust-induced gene protein                  | Q8IUF8-1 | 0.85 | 1.02 | 1.07 | 0.98 | 0.11 | 5  | 14.6 | 1.19E-38 |  |
| IPI00216746 | Heterogeneous nuclear ribonucleoprotein K          | P61978-2 | 1.11 | 1.01 | 1.00 | 1.04 | 0.06 | 28 | 59.1 | 0        |  |
| IPI00216750 | Developmentally-regulated RNA-binding protein 1    | Q8IUH3-1 | 1.35 |      |      | 1.35 |      | 1  | 2.9  | 6.33E-08 |  |

|             |                                                                     |          |      |      |      |      |      |    |      |          |
|-------------|---------------------------------------------------------------------|----------|------|------|------|------|------|----|------|----------|
| IPI00216873 | 3-5 exonuclease ERI1                                                | Q8IV48   | 0.95 | 1.00 |      | 0.98 | 0.04 | 2  | 7.2  | 7.8E-41  |
| IPI00216874 | LysM and putative peptidoglycan-binding domain-containing protein 2 | Q8IV50-1 | 0.76 | 0.95 |      | 0.85 | 0.13 | 2  | 9.8  | 4.82E-08 |
| IPI00216919 | cDNA FLJ51091, highly similar to 65 kDa Yes-associated protein      | B4DTY1   | 1.35 | 1.04 | 1.15 | 1.18 | 0.16 | 8  | 27.2 | 3.06E-49 |
| IPI00216951 | Aspartate--tRNA ligase                                              | P14868   | 0.96 | 0.93 | 0.93 | 0.94 | 0.01 | 27 | 57.3 | 0        |
| IPI00216952 | 70 kDa lamin                                                        | P02545-2 | 1.89 | 1.18 | 1.20 | 1.42 | 0.41 | 60 | 79.7 | 0        |
| IPI00216965 | 27 kDa Golgi SNARE protein                                          | O14653-2 | 0.84 | 0.86 | 0.88 | 0.86 | 0.02 | 4  | 18.3 | 3.5E-09  |
| IPI00216999 | Pumilio domain-containing protein C14orf21                          | Q86U38   | 0.83 | 0.74 | 0.98 | 0.85 | 0.12 | 6  | 12.1 | 1.8E-116 |
| IPI00217007 | Uncharacterized protein KIAA2013                                    | Q8IYS2-2 |      |      | 1.05 | 1.05 |      | 2  | 3.9  | 3.89E-06 |
| IPI00217013 | Serine/threonine-protein phosphatase 4 regulatory subunit 3A        | Q6IN85-1 |      | 1.44 | 0.96 | 1.20 | 0.34 | 4  | 6.2  | 6.86E-09 |
| IPI00217018 | Sterile alpha motif domain-containing protein 9                     | Q5K651   | 1.06 | 1.18 | 1.36 | 1.20 | 0.15 | 3  | 3.3  | 3.49E-47 |
| IPI00217030 | 40S ribosomal protein S4, X isoform                                 | P62701   | 0.80 | 0.88 | 0.84 | 0.84 | 0.04 | 26 | 74.9 | 1.9E-288 |
| IPI00217056 | Leprecan-like protein 2                                             | Q8IVL6-1 | 1.20 | 1.11 | 1.16 | 1.16 | 0.05 | 8  | 15.1 | 2.1E-146 |
| IPI00217059 | Coiled-coil domain-containing protein 50                            | Q8IVM0-2 | 0.92 | 1.06 | 1.02 | 1.00 | 0.07 | 9  | 20.1 | 8.13E-75 |
| IPI00217069 | 70 kDa ribosomal protein S6 kinase 2                                | Q9UBS0   |      | 0.81 |      | 0.81 |      | 2  | 12   | 1.89E-06 |
| IPI00217104 | Hepatocellular carcinoma-associated protein 4                       | Q96MG7   | 1.00 | 1.01 | 1.00 | 1.00 | 0.00 | 5  | 20.7 | 5.38E-78 |
| IPI00217143 | SDHA protein                                                        | Q8IW48   | 1.10 | 1.07 | 1.08 | 1.08 | 0.01 | 10 | 33.5 | 0        |
| IPI00217223 | AIR carboxylase                                                     | P22234   | 0.87 | 1.07 | 1.00 | 0.98 | 0.10 | 25 | 51.9 | 0        |
| IPI00217236 | TCP1-chaperonin cofactor A                                          | O75347   | 0.97 | 0.98 | 0.90 | 0.95 | 0.05 | 14 | 63.9 | 5.2E-285 |
| IPI00217240 | WD repeat-containing protein 75                                     | Q8IWA0   | 0.99 | 1.05 | 0.80 | 0.95 | 0.13 | 5  | 8.4  | 4.5E-134 |
| IPI00217261 | Testis-expressed sequence 2 protein                                 | Q8IWB9-2 |      |      | 1.16 | 1.16 |      | 1  | 1.2  | 0.010289 |
| IPI00217272 | Acetoacetyl-CoA synthetase                                          | Q86V21-1 | 0.89 | 0.87 | 0.88 | 0.88 | 0.01 | 4  | 7.7  | 2.05E-50 |
| IPI00217282 | DCN1-like protein 3                                                 | Q8IWE4   |      |      | 1.02 | 1.02 |      | 3  | 14.1 | 3.4E-05  |
| IPI00217313 | DnaJ homolog subfamily C member 20                                  | Q8IWL3   | 1.03 |      |      | 1.03 |      | 2  | 8.5  | 0.000169 |
| IPI00217354 | ADP-ribosylation factor 1 GTPase-activating protein                 | Q8N6T3-2 | 0.98 | 1.07 | 0.93 | 0.99 | 0.07 | 10 | 36.2 | 2E-224   |
| IPI00217357 | Cell cycle and apoptosis regulatory protein 1                       | Q8IX12-1 | 1.03 | 1.04 | 1.13 | 1.07 | 0.06 | 10 | 9.6  | 5.8E-162 |
| IPI00217413 | ATP-dependent RNA helicase DHX29                                    | Q7Z478   | 0.88 | 1.06 | 0.97 | 0.97 | 0.09 | 8  | 8    | 5.85E-77 |
| IPI00217465 | Histone H1.2                                                        | P16403   | 0.92 | 1.17 |      | 1.04 | 0.18 | 15 | 38.5 | 3.2E-178 |
| IPI00217467 | Histone H1.4                                                        | P10412   | 1.31 | 0.95 | 1.06 | 1.11 | 0.18 | 18 | 47.9 | 1.1E-213 |

|             |                                                                    |          |      |      |      |      |      |    |      |          |
|-------------|--------------------------------------------------------------------|----------|------|------|------|------|------|----|------|----------|
| IPI00217468 | Histone H1.5                                                       | P16401   | 1.35 | 0.92 | 1.10 | 1.12 | 0.22 | 17 | 42.9 | 1.1E-302 |
| IPI00217469 | Histone H1.1                                                       | Q02539   | 1.33 | 0.90 | 0.86 | 1.03 | 0.26 | 12 | 32.1 | 4.5E-192 |
| IPI00217477 | High mobility group protein 2a                                     | O15347   | 1.32 | 1.02 | 1.07 | 1.14 | 0.16 | 13 | 48   | 2.3E-255 |
| IPI00217490 | Factor for adipocyte differentiation 104                           | Q53EP0-1 | 0.76 | 0.73 | 0.79 | 0.76 | 0.03 | 6  | 6.9  | 2.05E-15 |
| IPI00217519 | Ras-related protein Ral-A                                          | P11233   | 1.04 | 1.00 | 1.10 | 1.05 | 0.05 | 7  | 30.6 | 5.3E-135 |
| IPI00217540 | BRAF35-HDAC complex protein BHC110                                 | O60341-2 | 1.26 | 0.98 | 1.04 | 1.09 | 0.15 | 3  | 5.5  | 1.03E-27 |
| IPI00217541 | ATP-dependent RNA helicase DDX51                                   | Q8N8A6   |      | 2.14 | 0.60 | 1.37 | 1.09 | 2  | 8.1  | 1.19E-24 |
| IPI00217553 | 39S ribosomal protein L27 homolog                                  | Q8IXM3   | 1.02 | 0.88 | 0.95 | 0.95 | 0.07 | 5  | 33.6 | 4.45E-24 |
| IPI00217557 | Nuclear envelope membrane protein                                  | Q8IXM6-1 |      | 1.02 | 1.06 | 1.04 | 0.02 | 3  | 13.4 | 2.12E-07 |
| IPI00217563 | Fibronectin receptor subunit beta                                  | P05556-1 | 1.14 | 1.00 | 1.14 | 1.09 | 0.08 | 19 | 26.8 | 3.7E-293 |
| IPI00217630 | DEAH box protein 37                                                | Q8IY37   |      |      | 0.71 | 0.71 |      | 2  | 2.9  | 8.62E-05 |
| IPI00217652 | Glucoside xylosyltransferase 1                                     | Q4G148-1 |      |      | 1.10 | 1.10 |      | 2  | 5.5  | 0.001938 |
| IPI00217661 | Protein raver-1                                                    | Q8IY67-2 | 1.33 | 1.28 | 1.09 | 1.23 | 0.13 | 17 | 43.5 | 1.2E-155 |
| IPI00217686 | Protein ftsJ homolog 3                                             | Q8IY81   | 0.99 | 0.99 | 0.91 | 0.96 | 0.05 | 15 | 24.3 | 1.5E-126 |
| IPI00217766 | 85 kDa lysosomal membrane sialoglycoprotein                        | Q14108   | 1.37 | 1.02 | 1.28 | 1.22 | 0.18 | 5  | 14   | 1.41E-16 |
| IPI00217831 | Ankyrin repeat domain-containing protein 13A                       | Q8IZ07   | 0.83 | 1.06 | 1.15 | 1.01 | 0.17 | 5  | 9.7  | 6.14E-64 |
| IPI00217852 | Aminoacylase-1-like protein 2                                      | Q8IYS1   | 1.02 | 0.81 | 1.14 | 0.99 | 0.17 | 3  | 11   | 2.95E-10 |
| IPI00217862 | RRP9 homolog                                                       | O43818   | 0.74 | 0.83 | 0.79 | 0.79 | 0.04 | 11 | 25.1 | 1.6E-160 |
| IPI00217918 | ELMO domain-containing protein 2                                   | Q8IZ81   | 0.99 | 1.04 |      | 1.02 | 0.03 | 4  | 14.3 | 8.35E-18 |
| IPI00217920 | Aldehyde dehydrogenase family 16 member A1                         | Q8IZ83-1 |      | 1.24 | 1.08 | 1.16 | 0.12 | 7  | 18.2 | 1.63E-50 |
| IPI00217943 | Ras-related protein Rab-6A                                         | P20340-2 | 1.10 | 1.18 | 1.22 | 1.16 | 0.06 | 11 | 55.8 | 0        |
| IPI00217949 | E2-EPF                                                             | Q16763   | 0.98 | 1.10 | 1.06 | 1.04 | 0.06 | 8  | 52.3 | 3.08E-88 |
| IPI00217950 | High mobility group nucleosome-binding domain-containing protein 2 | P05204   | 1.68 | 1.37 | 1.24 | 1.43 | 0.23 | 6  | 53.3 | 1.42E-92 |
| IPI00217952 | D-fructose-6-phosphate amidotransferase 1                          | Q06210-1 | 0.94 | 1.18 | 1.12 | 1.08 | 0.13 | 20 | 37.9 | 0        |
| IPI00217975 | Lamin-B1                                                           | P20700   | 1.29 | 1.16 | 1.23 | 1.23 | 0.07 | 43 | 62.8 | 0        |
| IPI00218019 | 5F7                                                                | P35613-1 | 1.48 | 0.84 | 0.97 | 1.10 | 0.34 | 8  | 26.8 | 1.6E-181 |
| IPI00218187 | Protein phosphatase 1C catalytic subunit                           | P36873-2 | 0.66 | 0.78 | 0.96 | 0.80 | 0.15 | 15 | 41.5 | 0        |
| IPI00218214 | Inhibitor of p53-induced apoptosis-alpha                           | O75414-1 |      |      | 1.10 | 1.10 |      | 2  | 11.9 | 5.98E-11 |
| IPI00218236 | Serine/threonine-protein phosphatase PP1-beta catalytic subunit    | P62140   | 0.90 | 0.95 | 1.12 | 0.99 | 0.12 | 16 | 47.1 | 0        |

|             |                                                                                          |          |      |      |      |      |      |    |      |          |
|-------------|------------------------------------------------------------------------------------------|----------|------|------|------|------|------|----|------|----------|
| IPI00218268 | Aging-associated gene 8 protein                                                          | Q99720-1 |      | 0.84 | 0.99 | 0.92 | 0.11 | 2  | 11.2 | 3.22E-07 |
| IPI00218288 | Protein transport protein Sec24D                                                         | O94855-2 | 0.86 | 1.14 | 1.14 | 1.05 | 0.16 | 15 | 20   | 4.6E-165 |
| IPI00218319 | Gamma-tropomyosin                                                                        | P06753-2 | 1.12 | 0.95 | 1.05 | 1.04 | 0.08 | 41 | 85.5 | 0        |
| IPI00218337 | Lectin mannose-binding 2-like                                                            | Q9H0V9-2 | 1.09 | 1.23 | 1.13 | 1.15 | 0.07 | 3  | 8.9  | 4.56E-06 |
| IPI00218342 | C-1-tetrahydrofolate synthase, cytoplasmic                                               | P11586   |      | 1.05 | 1.02 | 1.04 | 0.02 | 43 | 43.1 | 0        |
| IPI00218343 | Alpha-tubulin 6                                                                          | Q9BQE3   | 1.11 | 1.13 | 1.14 | 1.13 | 0.02 | 31 | 74.4 | 0        |
| IPI00218349 | GDP-fucose protein O-fucosyltransferase 2                                                | Q9Y2G5-3 | 1.18 | 1.31 | 1.29 | 1.26 | 0.07 | 6  | 14.2 | 6.11E-43 |
| IPI00218442 | Calcium pump 3                                                                           | Q93084-6 |      | 0.91 |      | 0.91 |      | 3  | 3.4  | 3.59E-48 |
| IPI00218449 | Oxysterol-binding protein-related protein 9                                              | Q96SU4-2 |      |      | 1.21 | 1.21 |      | 6  | 10.1 | 3.4E-117 |
| IPI00218463 | Mitochondria-associated granulocyte macrophage CSF-signaling molecule                    | Q9Y3D7   |      |      | 0.91 | 0.91 |      | 1  | 18.4 | 3.1E-215 |
| IPI00218465 | Phospholipase A-2-activating protein                                                     | Q9Y263   | 1.07 | 1.14 | 1.09 | 1.10 | 0.04 | 18 | 28.4 | 4.9E-218 |
| IPI00218466 | cDNA FLJ59739, highly similar to Protein transport protein Sec61 subunit alpha isoform 1 | B4DR61   |      | 0.81 | 1.04 | 0.93 | 0.16 | 3  | 8.3  | 6.66E-12 |
| IPI00218474 | 2-phospho-D-glycerate hydro-lyase                                                        | P13929-1 |      | 0.95 | 1.04 | 0.99 | 0.06 | 8  | 25.6 | 0        |
| IPI00218493 | Hypoxanthine-guanine phosphoribosyltransferase                                           | P00492   | 0.93 | 0.98 | 0.96 | 0.96 | 0.02 | 10 | 49.1 | 9.7E-113 |
| IPI00218539 | Collagen alpha-1(XI) chain                                                               | P12107-2 | 1.39 |      | 1.28 | 1.34 | 0.07 | 17 | 15.3 | 2.2E-216 |
| IPI00218606 | 40S ribosomal protein S23                                                                | P62266   | 0.82 | 0.94 | 0.89 | 0.88 | 0.06 | 6  | 37.1 | 5.26E-26 |
| IPI00218624 | Bax antagonist selected in saccharomyces 1                                               | P18583-9 |      | 0.81 | 1.03 | 0.92 | 0.16 | 4  | 3.2  | 1.68E-21 |
| IPI00218682 | Procollagen-proline,2-oxoglutarate-4-dioxygenase subunit alpha-1                         | P13674-2 |      |      | 1.11 | 1.11 |      | 21 | 45.1 | 0        |
| IPI00218693 | Adenine phosphoribosyltransferase                                                        | P07741   | 1.00 | 1.03 | 1.00 | 1.01 | 0.02 | 7  | 53.9 | 9.26E-44 |
| IPI00218694 | Caldesmon                                                                                | Q05682-2 | 0.80 |      |      | 0.80 |      | 36 | 48.9 | 0        |
| IPI00218696 | Caldesmon                                                                                | Q05682-4 | 0.62 |      |      | 0.62 |      | 36 | 50.3 | 0        |
| IPI00218729 | Disks large homolog 1                                                                    | Q12959-2 | 1.48 | 0.93 | 0.93 | 1.11 | 0.32 | 7  | 15.1 | 1.98E-36 |
| IPI00218733 | Superoxide dismutase [Cu-Zn]                                                             | P00441   | 1.41 | 1.11 | 1.11 | 1.21 | 0.18 | 13 | 90.9 | 1.4E-302 |
| IPI00218775 | 51 kDa FK506-binding protein                                                             | Q13451   |      | 1.35 | 1.04 | 1.20 | 0.23 | 3  | 5.9  | 0.000302 |
| IPI00218782 | Capping protein (Actin filament) muscle Z-line, beta                                     | B1AK88   | 0.94 |      | 1.08 | 1.01 | 0.10 | 25 | 49.9 | 3.2E-283 |
| IPI00218803 | Fibulin-1                                                                                | P23142-3 |      | 1.47 |      | 1.47 |      | 2  | 4.7  | 2.86E-39 |
| IPI00218831 | Glutathione S-transferase Mu 1                                                           | P09488-1 | 1.07 | 1.16 | 1.16 | 1.13 | 0.05 | 15 | 55.5 | 7E-156   |
| IPI00218848 | ATP synthase subunit e, mitochondrial                                                    | P56385   | 0.92 |      | 0.97 | 0.95 | 0.04 | 2  | 23.6 | 1.78E-05 |

|             |                                                            |          |      |      |      |      |      |    |      |          |
|-------------|------------------------------------------------------------|----------|------|------|------|------|------|----|------|----------|
| IPI00218858 | Dual specificity mitogen-activated protein kinase kinase 3 | P46734-3 | 0.75 | 0.88 | 0.83 | 0.82 | 0.06 | 8  | 23.3 | 5.4E-151 |
| IPI00218889 | Dynamin-2                                                  | P50570-2 |      | 1.15 |      | 1.15 |      | 24 | 31.9 | 2E-113   |
| IPI00218895 | DNA-directed RNA polymerase II subunit G                   | P62487   | 0.88 | 1.01 | 0.99 | 0.96 | 0.07 | 3  | 22.7 | 2.81E-32 |
| IPI00218918 | Annexin A1                                                 | P04083   | 1.00 | 1.15 | 1.19 | 1.11 | 0.10 | 33 | 78.3 | 0        |
| IPI00218922 | Translocation protein SEC63 homolog                        | Q9UGP8   | 0.90 | 0.91 | 0.85 | 0.89 | 0.03 | 9  | 14.2 | 4.8E-118 |
| IPI00218924 | Calcineurin B homolog                                      | Q99653   | 1.25 | 1.21 | 1.36 | 1.27 | 0.07 | 13 | 70.8 | 2.2E-300 |
| IPI00218962 | Chromosome 20 open reading frame 43                        | A2A2L5   | 0.82 | 1.26 | 1.22 | 1.10 | 0.24 | 6  | 21.1 | 4.06E-98 |
| IPI00219005 | 51 kDa FK506-binding protein                               | Q02790   | 0.90 | 0.90 | 0.82 | 0.87 | 0.05 | 29 | 64.7 | 0        |
| IPI00219006 | 40S ribosomal protein S19-binding protein 1                | Q86WX3   | 1.06 | 1.06 | 1.13 | 1.09 | 0.04 | 4  | 35.3 | 1.17E-51 |
| IPI00219018 | Glyceraldehyde-3-phosphate dehydrogenase                   | P04406   | 0.97 | 1.09 | 1.09 | 1.05 | 0.07 | 26 | 77   | 0        |
| IPI00219025 | Glutaredoxin-1                                             | P35754   |      | 1.39 | 1.13 | 1.26 | 0.18 | 3  | 31.1 | 2.61E-15 |
| IPI00219029 | Aspartate aminotransferase, cytoplasmic                    | P17174   | 1.08 | 1.12 | 1.08 | 1.10 | 0.02 | 18 | 54.5 | 5.3E-278 |
| IPI00219034 | Complex I-19kD                                             | P51970   | 0.98 | 0.93 | 0.91 | 0.94 | 0.04 | 8  | 59.9 | 6.8E-154 |
| IPI00219037 | Histone H2A.x                                              | P16104   | 1.33 | 1.26 | 1.31 | 1.30 | 0.04 | 5  | 38.5 | 2.8E-128 |
| IPI00219038 | Histone H3.3                                               | P84243   |      | 1.03 | 1.07 | 1.05 | 0.03 | 11 | 55.1 | 9.41E-28 |
| IPI00219067 | Glutathione S-transferase Mu 2                             | P28161   |      |      | 1.33 | 1.33 |      | 8  | 39   | 2.93E-60 |
| IPI00219077 | Leukotriene A(4) hydrolase                                 | P09960-1 | 1.15 | 1.14 | 1.11 | 1.13 | 0.02 | 22 | 44.5 | 0        |
| IPI00219078 | Calcium pump 2                                             | P16615-1 | 0.89 | 0.94 | 1.09 | 0.97 | 0.10 | 17 | 22.2 | 4.5E-195 |
| IPI00219097 | High mobility group protein 2                              | P26583   | 1.52 | 1.08 | 1.12 | 1.24 | 0.24 | 20 | 49.8 | 1.8E-196 |
| IPI00219110 | Frequenin homolog                                          | P62166   | 1.11 | 1.07 | 1.41 | 1.19 | 0.19 | 4  | 30   | 1.08E-42 |
| IPI00219129 | NRH dehydrogenase [quinone] 2                              | P16083   | 1.03 | 1.26 | 1.32 | 1.21 | 0.15 | 3  | 16.5 | 2.87E-27 |
| IPI00219153 | 60S ribosomal protein L22                                  | P35268   | 0.83 | 0.51 | 0.88 | 0.74 | 0.20 | 6  | 60.9 | 1.3E-137 |
| IPI00219155 | 60S ribosomal protein L27                                  | P61353   | 0.96 | 0.86 | 0.90 | 0.91 | 0.05 | 10 | 49.3 | 8.74E-83 |
| IPI00219160 | 60S ribosomal protein L34                                  | P49207   | 0.79 | 0.97 | 0.87 | 0.88 | 0.09 | 8  | 39.3 | 2.54E-21 |
| IPI00219168 | Beta-V spectrin                                            | Q9NRC6   |      | 0.99 |      | 0.99 |      | 3  | 0.8  | 0.0109   |
| IPI00219217 | LDH heart subunit                                          | P07195   | 0.88 | 1.00 | 0.98 | 0.95 | 0.07 | 24 | 52.4 | 0        |
| IPI00219219 | 14 kDa laminin-binding protein                             | P09382   | 0.98 | 1.15 | 1.11 | 1.08 | 0.09 | 9  | 63   | 1.3E-292 |
| IPI00219229 | U6 snRNA-associated Sm-like protein LSm3                   | P62310   | 1.16 | 0.99 | 0.97 | 1.04 | 0.10 | 2  | 13.7 | 6.13E-10 |
| IPI00219299 | Talin-2                                                    | Q9Y4G6   | 0.88 | 0.84 | 0.92 | 0.88 | 0.04 | 26 | 12.5 | 0        |
| IPI00219301 | Myristoylated alanine-rich C-kinase substrate              | P29966   | 1.57 | 1.01 | 1.08 | 1.22 | 0.31 | 15 | 56.9 | 0        |

|             |                                                                                                |          |      |      |      |      |      |    |      |          |
|-------------|------------------------------------------------------------------------------------------------|----------|------|------|------|------|------|----|------|----------|
| IPI00219344 | Calcium-binding protein BDR-1                                                                  | P37235   | 1.34 | 1.87 | 1.75 | 1.65 | 0.28 | 4  | 22.3 | 7.78E-22 |
| IPI00219365 | Membrane-organizing extension spike protein                                                    | P26038   | 1.04 | 1.10 | 1.13 | 1.09 | 0.05 | 64 | 78.9 | 0        |
| IPI00219381 | Complex I-B8                                                                                   | O43678   | 0.84 | 1.14 | 1.06 | 1.01 | 0.15 | 4  | 42.4 | 2.3E-138 |
| IPI00219385 | Complex I-B17                                                                                  | O95139   | 1.17 | 0.86 | 1.09 | 1.04 | 0.16 | 3  | 18.8 | 2.39E-05 |
| IPI00219420 | Basement membrane-associated chondroitin proteoglycan                                          | Q9UQE7   | 1.10 | 1.08 | 1.22 | 1.13 | 0.08 | 36 | 36.6 | 0        |
| IPI00219436 | Microsomal signal peptidase 21 kDa subunit                                                     | Q9BY50   | 0.84 |      | 1.00 | 0.92 | 0.12 | 2  | 14.6 | 3.44E-13 |
| IPI00219445 | 11S regulator complex subunit gamma                                                            | P61289-2 | 0.82 | 0.93 | 0.85 | 0.87 | 0.06 | 13 | 47.9 | 0        |
| IPI00219446 | HCNPPP                                                                                         | P30086   | 1.26 | 1.14 | 1.11 | 1.17 | 0.08 | 12 | 75.4 | 0        |
| IPI00219468 | Profilin II                                                                                    | P35080-1 | 0.82 |      | 1.32 | 1.07 | 0.35 | 6  | 37.9 | 6.7E-184 |
| IPI00219518 | ADP-ribosylation factor-like protein 1                                                         | P40616   | 0.84 | 1.05 | 1.02 | 0.97 | 0.11 | 6  | 30.9 | 5.48E-70 |
| IPI00219525 | 6-phosphogluconate dehydrogenase, decarboxylating                                              | P52209   | 1.11 | 1.36 | 1.37 | 1.28 | 0.15 | 18 | 38.7 | 0        |
| IPI00219526 | Glucose phosphomutase 1                                                                        | P36871-1 | 1.16 | 1.11 | 1.09 | 1.12 | 0.04 | 26 | 50.5 | 0        |
| IPI00219568 | Phosphoglycerate kinase 2                                                                      | P07205   |      | 0.83 |      | 0.83 |      | 8  | 24   | 6.2E-162 |
| IPI00219575 | Bleomycin hydrolase                                                                            | Q13867   | 1.26 | 0.99 | 1.03 | 1.09 | 0.15 | 5  | 14.3 | 1.51E-70 |
| IPI00219604 | Dual specificity mitogen-activated protein kinase kinase 1                                     | Q02750   | 1.24 | 1.05 |      | 1.14 | 0.13 | 8  | 24.7 | 2E-112   |
| IPI00219616 | Phosphoribosyl pyrophosphate synthase I                                                        | P60891   | 0.91 | 0.93 | 0.92 | 0.92 | 0.01 | 18 | 59.4 | 3.9E-262 |
| IPI00219622 | Macropain subunit C3                                                                           | P25787   | 1.01 | 1.05 | 1.10 | 1.05 | 0.05 | 11 | 45.3 | 1.5E-146 |
| IPI00219628 | Protein kinase C beta type                                                                     | P05771-2 | 1.96 |      |      | 1.96 |      | 2  | 5.5  | 3.07E-30 |
| IPI00219649 | Beta-thionase                                                                                  | P35520-2 | 1.30 | 0.69 |      | 1.00 | 0.43 | 3  | 4.4  | 0.000141 |
| IPI00219673 | Glutathione S-transferase kappa 1                                                              | Q9Y2Q3   |      | 1.20 |      | 1.20 |      | 4  | 19   | 1.62E-56 |
| IPI00219675 | Cell migration-inducing gene 5 protein                                                         | P63000-2 | 0.92 | 1.20 | 1.13 | 1.08 | 0.15 | 12 | 50.7 | 5.6E-150 |
| IPI00219677 | Phosphodeoxyriboaldolase                                                                       | Q9Y315   | 0.99 | 1.18 | 1.07 | 1.08 | 0.10 | 7  | 34.6 | 3E-225   |
| IPI00219678 | Eukaryotic translation initiation factor 2 subunit 1                                           | P05198   | 0.82 | 0.84 | 0.92 | 0.86 | 0.06 | 27 | 68.6 | 0        |
| IPI00219679 | Ras-related protein Rab-28                                                                     | P51157-2 |      | 1.09 |      | 1.09 |      | 4  | 25.9 | 8.79E-89 |
| IPI00219682 | Erythrocyte band 7 integral membrane protein                                                   | P27105   | 1.09 | 1.28 | 1.29 | 1.22 | 0.11 | 10 | 46.5 | 3.5E-245 |
| IPI00219718 | cDNA FLJ76382, highly similar to Homo sapiens retinol binding protein 1, cellular (RBP1), mRNA | A8K2Q0   |      | 1.37 |      | 1.37 |      | 1  | 6.1  | 2.7E-15  |
| IPI00219729 | Mitochondrial 2-oxoglutarate/malate carrier protein                                            | Q02978   | 0.92 | 1.02 | 0.99 | 0.98 | 0.05 | 11 | 38.9 | 4.7E-139 |

|             |                                                                |          |      |      |      |      |      |    |      |          |
|-------------|----------------------------------------------------------------|----------|------|------|------|------|------|----|------|----------|
| IPI00219757 | Glutathione S-transferase P                                    | P09211   | 1.08 | 1.11 | 1.17 | 1.12 | 0.05 | 14 | 61.4 | 0        |
| IPI00219772 | Cell adhesion protein SQM1                                     | P17568   | 1.16 | 0.89 | 0.97 | 1.00 | 0.13 | 4  | 23.4 | 6.29E-09 |
| IPI00219774 | cAMP-dependent protein kinase type II-alpha regulatory subunit | P13861   | 0.97 | 1.18 | 1.08 | 1.08 | 0.10 | 17 | 53.7 | 0        |
| IPI00219783 | Ubiquitin-conjugating enzyme E2G 1                             | P62253   | 0.85 | 3.13 |      | 1.99 | 1.61 | 2  | 10   | 0.006058 |
| IPI00219825 | Prosaposin                                                     | B1AVU8   | 1.07 | 1.03 | 0.99 | 1.03 | 0.04 | 4  | 7.5  | 1.22E-22 |
| IPI00219840 | Adapter-related protein complex 2 sigma subunit                | P53680-1 |      | 1.06 |      | 1.06 |      | 3  | 12.7 | 0.000859 |
| IPI00219841 | DNA ligase 1                                                   | P18858   | 1.05 | 1.14 | 1.41 | 1.20 | 0.19 | 13 | 21.8 | 8.1E-108 |
| IPI00219861 | Adipocyte acid phosphatase                                     | P24666-1 | 0.87 | 1.16 | 1.15 | 1.06 | 0.16 | 6  | 47.5 | 1.2E-175 |
| IPI00219871 | N-alpha-acetyltransferase 38, NatC auxiliary subunit           | O95777   | 1.07 | 1.03 | 1.13 | 1.07 | 0.05 | 3  | 36.5 | 8.35E-32 |
| IPI00219910 | Biliverdin reductase B                                         | P30043   | 1.21 | 1.22 | 1.20 | 1.21 | 0.01 | 4  | 28   | 2.1E-116 |
| IPI00219919 | DNA methyltransferase 1-associated protein 1                   | Q9NPF5   |      | 1.14 | 1.27 | 1.21 | 0.09 | 3  | 10.7 | 2.07E-64 |
| IPI00219953 | Cytidine monophosphate kinase                                  | P30085   | 0.94 | 1.09 | 1.10 | 1.04 | 0.09 | 10 | 45.6 | 5.7E-193 |
| IPI00220007 | cDNA FLJ55764, highly similar to Apolipoprotein-L2             | B4E1T5   | 1.15 | 1.05 | 1.09 | 1.10 | 0.05 | 7  | 15.3 | 2.48E-83 |
| IPI00220014 | Isopentenyl-PP-delta-isomerase                                 | Q13907-2 | 2.87 | 3.07 | 3.58 | 3.17 | 0.36 | 9  | 43   | 1.5E-121 |
| IPI00220031 | Paxillin                                                       | P49023-3 | 0.87 | 1.16 | 1.05 | 1.03 | 0.15 | 8  | 20   | 3.7E-200 |
| IPI00220059 | Complex I-B15                                                  | O95168   | 1.05 | 1.02 | 0.97 | 1.01 | 0.04 | 4  | 38   | 2.85E-80 |
| IPI00220063 | Complex I-15 kDa                                               | O43920   |      | 0.99 | 1.08 | 1.04 | 0.06 | 3  | 29.2 | 6.87E-34 |
| IPI00220150 | Isocitrate dehydrogenase [NAD] subunit gamma, mitochondrial    | P51553   |      |      | 1.06 | 1.06 |      | 2  | 8.7  | 6.17E-05 |
| IPI00220152 | BRCA2 and CDKN1A-interacting protein                           | Q9P287-2 | 0.91 | 0.93 | 0.87 | 0.90 | 0.03 | 5  | 24.2 | 6.9E-132 |
| IPI00220154 | Dilute myosin heavy chain, non-muscle                          | Q9Y411-3 | 0.98 |      | 1.12 | 1.05 | 0.10 | 2  | 1.2  | 1.42E-28 |
| IPI00220158 | Alpha-adducin                                                  | P35611-3 | 1.21 | 1.50 | 1.24 | 1.32 | 0.16 | 12 | 20.4 | 2.1E-101 |
| IPI00220219 | Beta-coat protein                                              | P35606   | 0.87 | 1.02 | 1.00 | 0.96 | 0.08 | 33 | 48.8 | 0        |
| IPI00220232 | eIF-2B GDP-GTP exchange factor subunit delta                   | Q9UI10-2 | 0.92 | 0.89 |      | 0.91 | 0.02 | 8  | 20   | 3.7E-114 |
| IPI00220267 | Argininosuccinate lyase                                        | P04424   | 1.11 | 1.05 | 1.00 | 1.06 | 0.06 | 4  | 11   | 5.8E-103 |
| IPI00220271 | Alcohol dehydrogenase [NADP+]                                  | P14550   | 1.09 | 1.30 | 1.24 | 1.21 | 0.11 | 15 | 53.2 | 1.3E-300 |
| IPI00220278 | 20 kDa myosin light chain                                      | P24844   | 0.85 | 0.83 | 1.01 | 0.90 | 0.10 | 11 | 66.3 | 0        |
| IPI00220299 | FAD pyrophosphorylase                                          | Q8NFF5-1 | 1.18 | 0.89 | 0.72 | 0.93 | 0.23 | 4  | 11.2 | 6.06E-69 |
| IPI00220301 | 1-Cys peroxiredoxin                                            | P30041   | 1.02 | 1.06 | 1.06 | 1.05 | 0.02 | 19 | 65.2 | 0        |



|             |                                                                    |          |       |      |      |      |      |    |      |          |
|-------------|--------------------------------------------------------------------|----------|-------|------|------|------|------|----|------|----------|
| IPI00220302 | Female-lethal(2)D homolog                                          | Q15007-1 | 1.32  | 1.54 | 1.11 | 1.32 | 0.22 | 4  | 13.4 | 3.66E-59 |
| IPI00220308 | Merlin                                                             | P35240-2 | 0.98  | 1.06 | 0.93 | 0.99 | 0.07 | 5  | 8.7  | 1.02E-24 |
| IPI00220327 | 67 kDa cytokeratin                                                 | P04264   | 11.80 | 0.11 | 0.11 | 4.01 | 6.75 | 40 | 57.6 | 0        |
| IPI00220342 | DDAHI                                                              | O94760   | 1.27  | 1.14 | 1.29 | 1.23 | 0.08 | 3  | 16.5 | 3.14E-14 |
| IPI00220344 | 60S ribosomal protein L36a                                         | P83881   | 0.90  | 0.93 | 0.87 | 0.90 | 0.03 | 8  | 47.2 | 9.82E-46 |
| IPI00220362 | 10 kDa chaperonin                                                  | P61604   | 0.93  | 0.84 | 0.84 | 0.87 | 0.05 | 9  | 69.6 | 7.93E-81 |
| IPI00220373 | Abeta-degrading protease                                           | P14735   | 1.13  | 1.22 | 0.70 | 1.02 | 0.27 | 3  | 4    | 9.49E-25 |
| IPI00220402 | Protein phosphatase inhibitor 2                                    | P41236   | 1.06  | 1.09 | 1.21 | 1.12 | 0.07 | 5  | 27.3 | 5.77E-25 |
| IPI00220416 | Complex III subunit 7                                              | P14927   |       | 0.95 | 0.96 | 0.95 | 0.01 | 4  | 35.1 | 1.09E-37 |
| IPI00220484 | High mobility group nucleosome-binding domain-containing protein 4 | O00479   |       |      | 1.29 | 1.29 |      | 2  | 18.9 | 2.49E-78 |
| IPI00220487 | ATP synthase subunit d, mitochondrial                              | O75947-1 | 1.07  | 0.95 | 1.02 | 1.01 | 0.07 | 13 | 79.5 | 1.72E-84 |
| IPI00220503 | 50 kDa dynein-associated polypeptide                               | Q13561   | 1.16  | 0.98 | 1.06 | 1.07 | 0.09 | 18 | 52.7 | 0        |
| IPI00220527 | Sorting nexin-1                                                    | Q13596-2 | 1.14  |      | 1.26 | 1.20 | 0.08 | 10 | 23.9 | 1.87E-47 |
| IPI00220528 | Sm protein F                                                       | P62306   | 0.92  | 0.93 | 0.86 | 0.90 | 0.04 | 4  | 40.7 | 2.38E-98 |
| IPI00220566 | Selenoprotein Z                                                    | Q9NNW7-1 | 0.81  | 1.38 | 1.06 | 1.08 | 0.28 | 2  | 5    | 1E-34    |
| IPI00220567 | 5,10-methenyl-tetrahydrofolate synthetase                          | P49914   | 0.91  | 1.11 | 1.00 | 1.01 | 0.10 | 3  | 13.3 | 8.81E-14 |
| IPI00220578 | G(i) alpha-3                                                       | P08754   | 1.19  | 1.70 | 1.59 | 1.49 | 0.27 | 15 | 39.5 | 0        |
| IPI00220581 | Disks large-associated protein 4                                   | Q9Y2H0-2 |       | 1.35 | 1.24 | 1.29 | 0.08 | 2  | 4.2  | 7.7E-173 |
| IPI00220609 | Nucleoporin SEH1                                                   | Q96EE3-1 | 0.90  | 1.08 | 1.20 | 1.06 | 0.15 | 4  | 12.6 | 4.52E-63 |
| IPI00220628 | AKAP 120-like protein                                              | Q99996-6 |       | 0.91 |      | 0.91 |      | 3  | 1.3  | 3.03E-23 |
| IPI00220642 | 14-3-3 protein gamma                                               | P61981   | 0.99  | 1.04 | 1.02 | 1.02 | 0.03 | 20 | 68.8 | 0        |
| IPI00220648 | Phosphomevalonate kinase                                           | Q15126   | 0.97  | 1.05 | 1.12 | 1.05 | 0.07 | 13 | 63.5 | 1.4E-103 |
| IPI00220683 | AU-rich element RNA-binding protein 1                              | Q14103-2 |       | 1.11 | 1.11 | 1.11 | 0.00 | 22 | 43.2 | 0        |
| IPI00220709 | Beta-tropomyosin                                                   | P07951-2 | 0.71  | 0.82 | 0.89 | 0.81 | 0.09 | 45 | 83.1 | 0        |
| IPI00220726 | Apoptotic cysteine protease                                        | Q14790-9 | 1.30  | 1.27 |      | 1.28 | 0.02 | 3  | 7.2  | 4.08E-80 |
| IPI00220739 | Membrane-associated progesterone receptor component 1              | O00264   | 1.37  | 1.04 | 1.14 | 1.18 | 0.17 | 12 | 49.2 | 0        |
| IPI00220741 | Erythroid alpha-spectrin                                           | P02549-1 |       | 1.27 |      | 1.27 |      | 3  | 1.5  | 0.001527 |
| IPI00220766 | Aldoketomutase                                                     | Q04760   | 1.11  | 1.08 | 1.07 | 1.09 | 0.02 | 10 | 51.1 | 1.77E-70 |
| IPI00220770 | Dynactin subunit 6                                                 | O00399   | 0.64  | 1.01 |      | 0.83 | 0.26 | 3  | 18.9 | 8.86E-23 |

|             |                                                                    |          |      |      |      |      |      |    |      |          |
|-------------|--------------------------------------------------------------------|----------|------|------|------|------|------|----|------|----------|
| IPI00220827 | Thymosin beta-10                                                   | P63313   | 1.12 | 1.17 | 0.99 | 1.10 | 0.09 | 3  | 31.8 | 3.18E-14 |
| IPI00220834 | 86 kDa subunit of Ku antigen                                       | P13010   | 0.98 | 1.06 | 1.08 | 1.04 | 0.05 | 43 | 55.6 | 0        |
| IPI00220835 | Protein transport protein Sec61 subunit beta                       | P60468   | 0.76 | 1.06 | 0.97 | 0.93 | 0.16 | 3  | 37.5 | 2.86E-25 |
| IPI00220873 | 3-phosphoadenosine-5-phosphosulfate synthase                       | O95340-2 | 0.70 | 1.11 | 1.05 | 0.95 | 0.22 | 13 | 22.8 | 1.4E-163 |
| IPI00220918 | CXXC-type zinc finger protein 9                                    | P26358-2 | 0.79 |      |      | 0.79 |      | 27 | 20.2 | 7.2E-232 |
| IPI00221002 | 22 kDa peroxisomal membrane protein                                | Q9NR77   | 1.18 |      |      | 1.18 |      | 2  | 9.7  | 0.001831 |
| IPI00221012 | Deubiquitinating enzyme FAF-X                                      | Q93008-2 | 0.91 | 1.03 | 1.00 | 0.98 | 0.06 | 16 | 8.2  | 9.8E-109 |
| IPI00221035 | RNA polymerase B transcription factor 3                            | P20290-1 | 1.03 | 0.89 | 0.76 | 0.89 | 0.14 | 15 | 65.5 | 8.7E-189 |
| IPI00221088 | 40S ribosomal protein S9                                           | P46781   | 0.86 | 0.91 | 0.91 | 0.89 | 0.03 | 21 | 62.4 | 2.6E-165 |
| IPI00221089 | 40S ribosomal protein S13                                          | P62277   | 0.91 | 0.89 | 0.87 | 0.89 | 0.02 | 12 | 62.9 | 4.2E-154 |
| IPI00221091 | 40S ribosomal protein S15a                                         | P62244   | 0.82 | 0.92 | 0.76 | 0.83 | 0.08 | 7  | 45.4 | 2.02E-76 |
| IPI00221092 | 40S ribosomal protein S16                                          | P62249   | 0.77 | 0.93 | 0.93 | 0.88 | 0.09 | 10 | 56.8 | 9.17E-45 |
| IPI00221093 | 40S ribosomal protein S17                                          | P08708   | 0.90 | 0.91 | 0.82 | 0.88 | 0.05 | 14 | 72.6 | 6.7E-275 |
| IPI00221106 | Pre-mRNA-splicing factor SF3b 145 kDa subunit                      | Q13435   | 1.27 | 0.99 | 1.04 | 1.10 | 0.15 | 23 | 29.3 | 4.8E-158 |
| IPI00221108 | Thymidylate synthase                                               | P04818   | 0.86 | 1.20 | 1.20 | 1.08 | 0.20 | 11 | 46.6 | 4.5E-256 |
| IPI00221172 | N-recogin-7                                                        | Q8N806   | 1.19 | 1.43 | 1.56 | 1.39 | 0.19 | 1  | 3.1  | 4.2E-113 |
| IPI00221222 | Activated RNA polymerase II transcriptional coactivator p15        | P53999   | 1.19 | 1.15 | 1.06 | 1.13 | 0.07 | 11 | 56.7 | 4.96E-95 |
| IPI00221226 | 67 kDa calelectrin                                                 | P08133   | 0.97 | 1.03 | 1.06 | 1.02 | 0.05 | 60 | 78.5 | 0        |
| IPI00221231 | Bis(5-nucleosyl)-tetrphosphatase [asymmetrical]                    | P50583   | 0.97 | 1.14 | 0.92 | 1.01 | 0.12 | 4  | 36.1 | 7.31E-30 |
| IPI00221232 | Guanine nucleotide-binding protein G(I)/G(S)/G(O) subunit gamma-12 | Q9UBI6   | 1.03 | 1.20 | 1.16 | 1.13 | 0.09 | 5  | 70.8 | 1.72E-91 |
| IPI00221234 | Aldehyde dehydrogenase family 7 member A1                          | P49419   | 1.02 | 1.09 | 1.15 | 1.09 | 0.06 | 20 | 43.6 | 0        |
| IPI00221300 | eIF-2B GDP-GTP exchange factor subunit alpha                       | Q14232   | 0.85 | 1.20 | 0.97 | 1.01 | 0.18 | 11 | 39.7 | 1.5E-126 |
| IPI00221325 | 358 kDa nucleoporin                                                | P49792   | 0.80 | 1.02 | 0.93 | 0.92 | 0.11 | 28 | 12.7 | 3.4E-285 |
| IPI00221327 | RNA 3-terminal phosphate cyclase                                   | O00442-2 | 0.88 | 0.92 | 1.00 | 0.93 | 0.06 | 6  | 19.8 | 1.93E-31 |
| IPI00221328 | Chloride intracellular channel protein 2                           | O15247   | 1.01 |      | 1.29 | 1.15 | 0.20 | 5  | 32   | 3.98E-39 |
| IPI00232533 | Eukaryotic translation initiation factor 1A, X-chromosomal         | P47813   | 0.88 | 0.91 | 0.88 | 0.89 | 0.02 | 9  | 45.8 | 1.6E-274 |
| IPI00234252 | BRG1-associated factor 155                                         | Q92922   | 0.99 | 0.95 | 0.91 | 0.95 | 0.04 | 12 | 13.5 | 3.24E-88 |
| IPI00234793 | cDNA FLJ61112, highly similar to BTB/POZ                           | B4DGD9   |      | 0.90 |      | 0.90 |      | 3  | 14.3 | 2.26E-77 |

|             |                                                  |          |      |      |      |      |      |    |      |          |
|-------------|--------------------------------------------------|----------|------|------|------|------|------|----|------|----------|
|             | domain-containing protein KCTD15                 |          |      |      |      |      |      |    |      |          |
| IPI00237884 | A-kinase anchor protein 12                       | Q02952-1 | 1.04 | 0.90 | 0.84 | 0.93 | 0.11 | 2  | 1.8  | 1.34E-23 |
| IPI00238209 | NudC domain-containing protein 3                 | Q8IVD9   | 1.16 | 0.53 |      | 0.84 | 0.45 | 3  | 11.6 | 7.57E-13 |
| IPI00238218 | ARF GTPase-activating protein GIT2               | Q14161-1 |      | 1.05 |      | 1.05 |      | 2  | 4.9  | 1.1E-06  |
| IPI00238469 | Centrosomal protein of 97 kDa                    | Q8IW35-2 |      |      | 1.28 | 1.28 |      | 4  | 5.8  | 3.24E-71 |
| IPI00239077 | Adenosine 5-monophosphoramidase                  | P49773   | 0.97 | 1.12 | 1.08 | 1.06 | 0.08 | 6  | 40.5 | 1.35E-43 |
| IPI00239406 | Nesprin-2                                        | Q8WXH0-2 |      | 0.81 | 0.90 | 0.85 | 0.07 | 5  | 1    | 1.57E-09 |
| IPI00239815 | Cirhin                                           | Q969X6-1 | 0.88 | 0.76 | 0.69 | 0.78 | 0.10 | 8  | 16.5 | 3.4E-151 |
| IPI00241860 | Mitochondrial intermediate peptidase             | Q99797   |      | 0.68 | 1.09 | 0.89 | 0.29 | 2  | 4.8  | 3.53E-08 |
| IPI00242630 | HEAT repeat-containing protein 2                 | Q86Y56-1 | 1.17 | 1.09 | 0.96 | 1.07 | 0.10 | 3  | 5.5  | 2.16E-08 |
| IPI00243221 | Nardilysin (N-arginine dibasic convertase)       | B1AKJ5   | 0.95 | 0.96 | 1.00 | 0.97 | 0.02 | 16 | 14.3 | 1.35E-81 |
| IPI00246975 | Glutathione S-transferase Mu 3                   | P21266   | 1.06 | 1.09 | 1.08 | 1.08 | 0.02 | 13 | 53.3 | 3.6E-108 |
| IPI00247063 | Atriopeptidase                                   | P08473   |      | 1.41 | 1.88 | 1.64 | 0.33 | 2  | 3.6  | 1.97E-10 |
| IPI00247583 | 60S ribosomal protein L21                        | P46778   | 0.93 | 0.93 | 0.91 | 0.92 | 0.01 | 9  | 51.9 | 2.4E-65  |
| IPI00247871 | TATA box-binding protein-associated factor 2S    | O14776-1 | 1.10 | 0.90 | 1.00 | 1.00 | 0.10 | 11 | 12.1 | 1.54E-88 |
| IPI00249529 | Centrosomal protein of 78 kDa                    | Q5JTW2-2 | 1.16 | 1.22 | 1.05 | 1.14 | 0.09 | 5  | 11.8 | 9.73E-89 |
| IPI00250297 | 4-phosphopantetheinyl transferase                | Q9NRN7   | 0.77 | 0.97 | 0.98 | 0.91 | 0.12 | 7  | 20.7 | 2.8E-85  |
| IPI00251559 | E3 ubiquitin-protein ligase BRE1A                | Q5VTR2   | 0.92 | 1.05 | 1.06 | 1.01 | 0.08 | 14 | 16.4 | 1E-212   |
| IPI00251749 | Glucocorticoid receptor                          | P04150-3 | 1.23 | 1.34 | 1.06 | 1.21 | 0.14 | 6  | 11.7 | 1.7E-175 |
| IPI00251989 | DNA-directed RNA polymerase I subunit E          | Q9GZS1-1 | 0.79 | 0.80 |      | 0.79 | 0.01 | 3  | 8.1  | 2.13E-28 |
| IPI00253036 | 1.2E+08                                          | P14209-1 | 0.81 | 1.27 | 1.17 | 1.09 | 0.24 | 2  | 13   | 1.85E-37 |
| IPI00254162 | Neural polypyrimidine tract-binding protein      | Q9UKA9-3 |      |      | 0.83 | 0.83 |      | 2  | 7.8  | 4.87E-18 |
| IPI00254338 | Protein FAM134C                                  | Q86VR2   | 0.88 | 1.31 |      | 1.10 | 0.31 | 2  | 5.2  | 2.82E-09 |
| IPI00255052 | Complex I-B22                                    | Q9Y6M9   | 1.20 | 0.92 | 0.95 | 1.02 | 0.15 | 6  | 34.6 | 1.1E-100 |
| IPI00256861 | 620 kDa actin-binding protein                    | Q9UPN3-2 | 0.97 | 0.89 | 0.89 | 0.91 | 0.05 | 39 | 9.4  | 0        |
| IPI00257508 | Collapsin response mediator protein 2            | Q16555   | 1.49 | 1.38 | 1.39 | 1.42 | 0.06 | 26 | 60.3 | 0        |
| IPI00257882 | Imidodipeptidase                                 | P12955   | 0.99 | 1.14 | 1.11 | 1.08 | 0.08 | 7  | 17.8 | 1.75E-25 |
| IPI00257932 | Transcription elongation factor A protein-like 5 | Q5H9L2   | 1.60 |      |      | 1.60 |      | 2  | 12.1 | 4.94E-66 |
| IPI00258168 | Fox-1 homolog B                                  | O43251-8 | 1.30 | 1.15 | 1.10 | 1.18 | 0.10 | 4  | 15.1 | 1.52E-57 |
| IPI00260090 | cDNA FLJ60834, highly similar to Engulfment      | B4DRL5   | 1.50 | 1.28 | 1.13 | 1.30 | 0.18 | 10 | 19.9 | 2.02E-55 |

|             |                                                                 |          |      |      |      |      |      |    |      |          |
|-------------|-----------------------------------------------------------------|----------|------|------|------|------|------|----|------|----------|
|             | and cell motility protein 2 (CED-12 homolog A)                  |          |      |      |      |      |      |    |      |          |
| IPI00260715 | 75 kDa DNA-pairing protein                                      | P35637-1 | 1.43 | 0.79 | 0.94 | 1.05 | 0.33 | 9  | 17.8 | 1E-161   |
| IPI00288941 | Coactivator independent of AF-2                                 | Q9HCD5   | 1.06 | 0.59 | 0.93 | 0.86 | 0.24 | 4  | 10   | 1.35E-21 |
| IPI00288947 | Guanine nucleotide-binding protein alpha-q                      | P50148   | 1.17 | 1.24 | 1.25 | 1.22 | 0.04 | 10 | 32.3 | 1.54E-59 |
| IPI00289031 | Protein FAM160B1                                                | Q5W0V3-1 |      | 1.27 |      | 1.27 |      | 2  | 5.1  | 2E-30    |
| IPI00289082 | Protein-tyrosine phosphatase G1                                 | Q05209   | 1.43 | 1.21 | 0.99 | 1.21 | 0.22 | 7  | 12.3 | 2.7E-155 |
| IPI00289491 | Cancer susceptibility candidate gene 3 protein                  | O15234   | 1.11 |      |      | 1.11 |      | 2  | 5    | 5.53E-08 |
| IPI00289499 | 5-aminoimidazole-4-carboxamide ribonucleotide formyltransferase | P31939   | 0.86 | 0.97 | 0.98 | 0.94 | 0.07 | 33 | 66.7 | 0        |
| IPI00289547 | Transcription factor jun-D                                      | P17535   | 2.03 |      | 1.39 | 1.71 | 0.45 | 3  | 15   | 2.33E-54 |
| IPI00289601 | Histone deacetylase 2                                           | Q92769-2 | 0.92 | 1.01 | 1.00 | 0.98 | 0.05 | 9  | 19.9 | 6.1E-120 |
| IPI00289667 | DNA-directed RNA polymerase III subunit H                       | Q9Y535-1 | 0.93 | 1.22 |      | 1.07 | 0.20 | 2  | 20.6 | 3.42E-30 |
| IPI00289746 | Alpha-PAK                                                       | Q13153-2 |      | 1.17 | 1.32 | 1.24 | 0.11 | 6  | 14.8 | 0        |
| IPI00289758 | Calcium-activated neutral proteinase 2                          | P17655   | 1.00 | 1.15 | 1.12 | 1.09 | 0.08 | 29 | 46.4 | 0        |
| IPI00289807 | Mitochondrial tRNA nucleotidyl transferase, CCA-adding          | Q96Q11-1 | 0.96 | 1.02 | 0.89 | 0.96 | 0.07 | 8  | 21.4 | 1.9E-145 |
| IPI00289819 | 300 kDa mannose 6-phosphate receptor                            | P11717   | 1.01 | 0.59 | 0.98 | 0.86 | 0.23 | 8  | 3.7  | 1.23E-29 |
| IPI00289831 | Receptor-type tyrosine-protein phosphatase S                    | Q13332-1 |      | 0.94 | 1.94 | 1.44 | 0.71 | 2  | 1.8  | 2.78E-18 |
| IPI00289876 | Syntaxin-7                                                      | O15400-1 | 1.45 | 1.23 | 1.13 | 1.27 | 0.16 | 6  | 34.1 | 1.1E-128 |
| IPI00290071 | DDB1- and CUL4-associated factor 8                              | Q5TAQ9-1 |      |      | 0.95 | 0.95 |      | 2  | 3.9  | 5.31E-52 |
| IPI00290085 | Cadherin-2                                                      | P19022   | 1.10 | 0.96 | 1.00 | 1.02 | 0.07 | 5  | 8.4  | 1.4E-207 |
| IPI00290110 | Neoplastic transformation inhibitor protein                     | Q53EL6   | 4.00 | 3.70 | 3.23 | 3.64 | 0.39 | 6  | 24.7 | 6.91E-68 |
| IPI00290142 | CTP synthase 1                                                  | P17812   | 0.81 | 0.92 | 0.91 | 0.88 | 0.06 | 26 | 45   | 1.6E-189 |
| IPI00290192 | Aicardi-Goutieres syndrome 4 protein                            | O75792   | 0.98 | 1.51 | 1.12 | 1.20 | 0.28 | 4  | 24.4 | 1.24E-74 |
| IPI00290204 | U1 small nuclear ribonucleoprotein 70 kDa                       | P08621-1 | 1.26 | 1.08 | 1.11 | 1.15 | 0.09 | 17 | 31.1 | 3E-82    |
| IPI00290239 | Calcium/calmodulin-dependent protein kinase kinase 2            | Q96RR4-1 | 0.96 |      |      | 0.96 |      | 2  | 3.4  | 0.000647 |
| IPI00290272 | DNA polymerase alpha 70 kDa subunit                             | Q14181   | 0.85 | 1.10 | 0.99 | 0.98 | 0.12 | 4  | 11   | 6.87E-11 |
| IPI00290279 | Adenosine 5-phosphotransferase                                  | P55263-1 | 1.21 | 0.64 | 0.93 | 0.93 | 0.29 | 4  | 17.7 | 1.66E-16 |
| IPI00290305 | Nori-2                                                          | Q96S44   | 1.12 | 0.93 | 1.03 | 1.03 | 0.10 | 3  | 15.8 | 2.27E-84 |
| IPI00290314 | ATPase WRNIP1                                                   | Q96S55-1 |      | 1.24 |      | 1.24 |      | 3  | 6.3  | 1.4E-172 |

|             |                                                                                         |          |      |      |      |      |      |    |      |          |
|-------------|-----------------------------------------------------------------------------------------|----------|------|------|------|------|------|----|------|----------|
| IPI00290337 | Epidermal growth factor receptor kinase substrate 8                                     | Q12929   | 1.03 | 1.27 | 1.37 | 1.22 | 0.18 | 7  | 14.2 | 4.7E-145 |
| IPI00290358 | Protein CCSMST1                                                                         | Q4G0I0   |      | 0.89 |      | 0.89 |      | 2  | 34.8 | 2.04E-05 |
| IPI00290409 | BCL2/adenovirus E1B 19 kDa protein-interacting protein 3                                | Q12983   | 1.23 | 1.01 | 0.87 | 1.04 | 0.18 | 2  | 12.4 | 4.56E-16 |
| IPI00290410 | Deoxynucleotidyltransferase terminal-interacting protein 2                              | Q5QJE6   | 1.01 | 1.05 | 0.92 | 0.99 | 0.06 | 12 | 22.2 | 1E-232   |
| IPI00290435 | Kinesin-like protein 6                                                                  | Q99661-1 | 0.87 | 1.42 | 1.12 | 1.14 | 0.28 | 11 | 17.9 | 2.7E-121 |
| IPI00290460 | eIF3 p42                                                                                | O75821   | 1.01 | 0.91 | 0.83 | 0.92 | 0.09 | 12 | 45   | 5.7E-179 |
| IPI00290461 | eIF3 p35                                                                                | O75822   | 0.93 | 0.99 | 0.92 | 0.95 | 0.04 | 15 | 37.6 | 1.2E-76  |
| IPI00290462 | Carbonyl reductase [NADPH] 3                                                            | O75828   | 1.22 | 1.41 | 1.35 | 1.33 | 0.10 | 16 | 67.5 | 0        |
| IPI00290514 | Integrator complex subunit 9                                                            | Q9NV88   | 1.08 |      |      | 1.08 |      | 2  | 4.3  | 0.000269 |
| IPI00290542 | Hrs-binding protein                                                                     | O75886-1 | 1.20 | 1.07 | 0.95 | 1.08 | 0.12 | 5  | 11.4 | 1.15E-14 |
| IPI00290566 | CCT-alpha                                                                               | P17987   | 0.90 | 0.92 | 0.94 | 0.92 | 0.02 | 28 | 55.8 | 0        |
| IPI00290614 | Endonuclease G, mitochondrial                                                           | Q14249   |      | 1.62 |      | 1.62 |      | 2  | 7.7  | 0.007193 |
| IPI00290652 | HBV pX-associated protein 8                                                             | Q96T23-1 | 0.65 | 1.04 | 0.79 | 0.83 | 0.20 | 2  | 3    | 5.87E-76 |
| IPI00290684 | 2(3)-polynucleotidase                                                                   | Q96T60   | 1.24 | 1.20 | 1.01 | 1.15 | 0.12 | 7  | 17.9 | 4.7E-60  |
| IPI00290799 | Uncharacterized protein C18orf19                                                        | Q96ND0   | 1.10 | 1.12 |      | 1.11 | 0.01 | 4  | 11.8 | 2.31E-06 |
| IPI00290812 | Lodestar homolog                                                                        | Q9UNY4-1 |      | 1.37 | 1.24 | 1.31 | 0.09 | 6  | 8.1  | 1.18E-16 |
| IPI00290928 | Guanine nucleotide-binding protein subunit alpha-13                                     | Q14344   | 1.19 | 1.30 | 1.37 | 1.29 | 0.09 | 11 | 30.8 | 6.64E-86 |
| IPI00290945 | cDNA FLJ78444, highly similar to Homo sapiens paraoxonase 2, transcript variant 1, mRNA | A4D1H7   |      | 1.07 | 1.13 | 1.10 | 0.04 | 4  | 13.3 | 5.94E-96 |
| IPI00290952 | Ribosomal RNA processing protein 1 homolog B                                            | Q14684-1 | 0.87 | 1.03 | 0.99 | 0.96 | 0.08 | 11 | 18.7 | 5.91E-79 |
| IPI00290979 | 1-acylglycerol-3-phosphate O-acyltransferase ABHD5                                      | Q8WTS1   | 0.93 |      |      | 0.93 |      | 1  | 4.6  | 0.000983 |
| IPI00291006 | Malate dehydrogenase, mitochondrial                                                     | P40926   | 0.91 | 1.00 | 1.00 | 0.97 | 0.05 | 22 | 66.9 | 0        |
| IPI00291016 | Complex I-9kD                                                                           | Q8WU60   | 1.20 | 0.84 | 0.85 | 0.96 | 0.21 | 7  | 22.4 | 1.13E-73 |
| IPI00291093 | DNA-directed RNA polymerase II 23 kDa polypeptide                                       | P19388   | 0.90 | 0.98 | 1.07 | 0.98 | 0.09 | 5  | 27.6 | 2.1E-108 |
| IPI00291136 | Collagen alpha-1(VI) chain                                                              | P12109   | 1.12 | 1.01 | 1.15 | 1.10 | 0.07 | 21 | 29.3 | 0        |
| IPI00291200 | 133 kDa nucleoporin                                                                     | Q8WUM0   | 0.96 | 1.08 | 1.03 | 1.02 | 0.06 | 19 | 21.1 | 1.8E-291 |
| IPI00291215 | B aggressive lymphoma protein 2                                                         | Q460N5-2 | 1.25 | 1.21 | 1.56 | 1.34 | 0.19 | 5  | 4.3  | 4.21E-11 |
| IPI00291316 | Guanine nucleotide exchange factor H1                                                   | Q92974-1 |      |      | 0.97 | 0.97 |      | 25 | 31.8 | 1.4E-236 |

|             |                                                                  |          |      |      |      |      |      |    |      |          |
|-------------|------------------------------------------------------------------|----------|------|------|------|------|------|----|------|----------|
| IPI00291398 | Nucleolysin TIA-1 isoform p15                                    | P31483-1 | 0.93 | 1.17 | 1.04 | 1.05 | 0.12 | 6  | 13.7 | 2.37E-43 |
| IPI00291412 | Ca(2+)/calmodulin-dependent protein kinase phosphatase           | P49593   | 1.07 | 1.08 | 1.07 | 1.07 | 0.00 | 7  | 26   | 3.83E-55 |
| IPI00291417 | Dephospho-CoA kinase domain-containing protein                   | Q8WVC6-1 |      | 1.17 | 1.03 | 1.10 | 0.10 | 2  | 10   | 4.1E-06  |
| IPI00291419 | Acetoacetyl-CoA acetyltransferase-2                              | Q9BWD1   | 1.56 | 1.68 | 1.79 | 1.68 | 0.12 | 15 | 40.6 | 0        |
| IPI00291467 | Adenine nucleotide translocator 3                                | P12236   | 0.74 | 0.83 | 0.74 | 0.77 | 0.05 | 17 | 46.3 | 3.84E-82 |
| IPI00291483 | 17-beta-hydroxysteroid dehydrogenase type 5                      | P42330   | 0.98 |      | 1.40 | 1.19 | 0.30 | 10 | 31.9 | 2.2E-138 |
| IPI00291510 | IMPDH-II                                                         | P12268   | 0.83 | 0.94 | 0.92 | 0.90 | 0.06 | 25 | 50.4 | 0        |
| IPI00291570 | Caspase-2                                                        | P42575-1 | 1.36 | 1.18 |      | 1.27 | 0.13 | 2  | 8.8  | 3.3E-08  |
| IPI00291608 | PEST proteolytic signal-containing nuclear protein               | Q8WW12-1 | 1.50 | 1.10 | 1.08 | 1.22 | 0.24 | 9  | 52.2 | 2.6E-194 |
| IPI00291643 | SPRY domain-containing protein 4                                 | Q8WW59   |      | 0.84 |      | 0.84 |      | 2  | 9.2  | 0.001805 |
| IPI00291646 | Methylenetetrahydrofolate dehydrogenase (NADP+ dependent) 1-like | B7ZM99   | 0.76 | 0.72 | 0.70 | 0.73 | 0.03 | 12 | 15.8 | 3.41E-66 |
| IPI00291669 | Ubiquitin-like domain-containing CTD phosphatase 1               | Q8WVY7   | 1.22 | 1.18 | 1.01 | 1.14 | 0.12 | 5  | 15.1 | 1.64E-16 |
| IPI00291695 | Probable glutathione peroxidase 8                                | Q8TED1   | 0.92 | 1.06 | 1.09 | 1.02 | 0.09 | 6  | 31.6 | 4.81E-59 |
| IPI00291751 | Uncharacterized protein C2orf47, mitochondrial                   | Q8WWC4   | 0.83 | 0.81 | 0.85 | 0.83 | 0.02 | 5  | 17.9 | 1.64E-10 |
| IPI00291764 | Histone H2A type 1                                               | P0C0S8   | 1.26 | 1.19 | 1.02 | 1.16 | 0.12 | 7  | 46.2 | 4.7E-297 |
| IPI00291783 | Gem-associated protein 5                                         | Q8TEQ6   | 0.87 | 0.83 | 0.78 | 0.83 | 0.04 | 9  | 8    | 0        |
| IPI00291802 | F-box only protein 20                                            | Q8WWI1-3 | 0.83 | 0.97 | 0.95 | 0.92 | 0.08 | 22 | 23.1 | 0        |
| IPI00291893 | DCN1-like protein 1                                              | Q96GG9   | 0.96 | 1.17 | 1.26 | 1.13 | 0.15 | 6  | 24.7 | 5.8E-157 |
| IPI00291916 | IRS-1 PH domain-binding protein                                  | Q8WWQ0   | 0.90 | 0.98 |      | 0.94 | 0.06 | 5  | 4.3  | 9.8E-38  |
| IPI00291922 | Macropain zeta chain                                             | P28066   | 0.96 | 1.00 | 1.00 | 0.99 | 0.02 | 12 | 57.3 | 1E-242   |
| IPI00291928 | Ras-related protein Rab-14                                       | P61106   | 1.01 | 1.08 | 1.14 | 1.08 | 0.07 | 15 | 77.7 | 0        |
| IPI00291930 | Clathrin interactor 1                                            | Q14677-1 | 1.14 | 1.31 | 1.17 | 1.21 | 0.09 | 8  | 19.1 | 8.08E-69 |
| IPI00291939 | Sb1.8                                                            | Q14683   | 1.12 | 1.08 | 1.16 | 1.12 | 0.04 | 20 | 18.2 | 2.48E-94 |
| IPI00291946 | Deubiquitinating enzyme 10                                       | Q14694   | 0.88 | 1.06 | 0.90 | 0.95 | 0.10 | 13 | 26.4 | 8.29E-58 |
| IPI00292000 | Pre-mRNA-processing factor 31                                    | Q8WWY3-1 | 1.16 | 1.11 | 1.04 | 1.10 | 0.06 | 13 | 29.7 | 5.7E-109 |
| IPI00292020 | Putrescine aminopropyltransferase                                | P19623   | 0.70 | 0.95 | 0.86 | 0.84 | 0.13 | 11 | 37.1 | 1.27E-92 |
| IPI00292134 | Epidermal growth factor receptor substrate 15                    | P42566-1 | 1.39 | 1.07 | 0.90 | 1.12 | 0.25 | 5  | 11.3 | 7.73E-30 |

|             |                                                              |          |      |      |      |      |      |    |      |          |
|-------------|--------------------------------------------------------------|----------|------|------|------|------|------|----|------|----------|
| IPI00292135 | Integral nuclear envelope inner membrane protein             | Q14739   | 1.08 | 0.95 | 1.13 | 1.05 | 0.09 | 4  | 8.6  | 6.7E-119 |
| IPI00292140 | Apopain                                                      | P42574   | 1.04 | 1.14 | 1.35 | 1.17 | 0.16 | 4  | 11.9 | 1.41E-08 |
| IPI00292168 | Anti-silencing function protein 1 homolog A                  | Q9Y294   | 1.33 | 1.10 | 1.24 | 1.22 | 0.11 | 3  | 16.7 | 1.19E-65 |
| IPI00292228 | Glycogen synthase kinase-3 alpha                             | P49840   | 0.93 | 1.20 | 1.15 | 1.09 | 0.14 | 5  | 19.3 | 5.26E-83 |
| IPI00292354 | E3 ubiquitin-protein ligase RNF181                           | Q9P0P0   | 0.78 | 1.07 | 0.90 | 0.91 | 0.15 | 4  | 27.5 | 4.67E-13 |
| IPI00292496 | Tubulin beta-8 chain                                         | Q3ZCM7   |      |      | 0.99 | 0.99 |      | 13 | 28.4 | 3.3E-140 |
| IPI00292499 | Heat shock 70 kDa protein 14                                 | Q0VDF9   | 0.79 | 1.02 | 0.85 | 0.89 | 0.12 | 5  | 16.1 | 1.31E-42 |
| IPI00292537 | DNA-binding factor KBF1                                      | P19838-2 | 0.80 | 0.82 | 1.05 | 0.89 | 0.14 | 9  | 13   | 6.01E-84 |
| IPI00292657 | 15-oxoprostaglandin 13-reductase                             | Q14914   | 1.45 | 1.15 | 1.10 | 1.23 | 0.19 | 7  | 24.3 | 1.92E-32 |
| IPI00292753 | GAPex-5                                                      | Q14C86-6 | 0.98 | 1.01 | 0.91 | 0.96 | 0.05 | 7  | 7.5  | 2.25E-75 |
| IPI00292787 | Actin-related protein 5                                      | Q9H9F9   | 1.03 | 1.21 | 1.05 | 1.10 | 0.10 | 5  | 14.3 | 2.49E-55 |
| IPI00292894 | Pre-rRNA-processing protein TSR1 homolog                     | Q2NL82   | 0.85 | 0.89 | 0.76 | 0.83 | 0.07 | 8  | 13.8 | 6.4E-204 |
| IPI00292953 | Ankycorbin                                                   | Q9P0K7-2 | 0.64 | 0.98 |      | 0.81 | 0.24 | 7  | 7.7  | 2.72E-40 |
| IPI00292975 | RNA-binding motif protein 27                                 | Q9P2N5   |      | 1.03 | 1.04 | 1.03 | 0.01 | 7  | 10.8 | 4.46E-24 |
| IPI00293009 | Rab GTPase-binding effector protein 1                        | Q15276-1 | 1.10 | 1.30 | 0.98 | 1.12 | 0.16 | 6  | 10.3 | 3.7E-167 |
| IPI00293026 | Elongation factor Tu GTP-binding domain-containing protein 1 | Q7Z2Z2-1 |      | 1.29 | 0.88 | 1.08 | 0.29 | 3  | 5.4  | 4.29E-25 |
| IPI00293073 | Fzo homolog                                                  | Q8IWA4-1 | 0.65 | 0.92 | 0.98 | 0.85 | 0.18 | 4  | 7.2  | 1.37E-66 |
| IPI00293078 | DEAD box protein 27                                          | Q96GQ7   | 0.95 | 0.97 | 0.98 | 0.97 | 0.01 | 8  | 11.8 | 1.59E-70 |
| IPI00293088 | 70 kDa lysosomal alpha-glucosidase                           | P10253   | 1.29 | 1.22 | 1.25 | 1.25 | 0.04 | 3  | 5.4  | 2.3E-15  |
| IPI00293126 | Cytoskeleton-associated protein 1                            | Q99426   | 0.92 | 1.18 | 1.13 | 1.08 | 0.14 | 16 | 45.5 | 7.6E-286 |
| IPI00293167 | Stromal cell-derived factor 2                                | Q99470   | 1.15 | 1.21 | 1.30 | 1.22 | 0.08 | 3  | 22.3 | 2.11E-34 |
| IPI00293260 | DnaJ homolog subfamily C member 10                           | Q8IXB1-1 | 1.04 | 1.02 | 1.08 | 1.05 | 0.03 | 6  | 10.8 | 1.71E-30 |
| IPI00293276 | Glycosylation-inhibiting factor                              | P14174   | 1.07 | 1.13 | 0.96 | 1.05 | 0.09 | 2  | 17.4 | 1.93E-38 |
| IPI00293303 | Asparaginyl endopeptidase                                    | Q99538   | 0.73 | 0.86 | 1.15 | 0.91 | 0.21 | 3  | 11.3 | 5.16E-55 |
| IPI00293307 | Adipophilin                                                  | Q99541   | 0.54 | 0.25 | 0.30 | 0.36 | 0.15 | 4  | 12.4 | 7.39E-29 |
| IPI00293331 | Ribonucleases P/MRP protein subunit POP1                     | Q99575   | 0.81 | 0.87 | 0.91 | 0.86 | 0.05 | 15 | 20.2 | 1.35E-70 |
| IPI00293350 | Translin-associated factor X                                 | Q99598   | 1.04 | 1.06 | 1.12 | 1.07 | 0.04 | 9  | 33.4 | 5.2E-118 |
| IPI00293425 | Frataxin intermediate form                                   | Q16595-1 | 0.97 | 0.77 | 0.81 | 0.85 | 0.11 | 4  | 25.7 | 3.79E-30 |
| IPI00293434 | 18 kDa Alu RNA-binding protein                               | P37108   | 1.08 | 1.34 | 1.27 | 1.23 | 0.13 | 8  | 42.6 | 1.27E-78 |

|             |                                                                                      |          |      |      |      |      |      |    |      |          |
|-------------|--------------------------------------------------------------------------------------|----------|------|------|------|------|------|----|------|----------|
| IPI00293464 | Damage-specific DNA-binding protein 1                                                | Q16531   | 1.03 | 1.00 | 1.07 | 1.03 | 0.03 | 41 | 41.6 | 1.3E-238 |
| IPI00293476 | 39S ribosomal protein L23, mitochondrial                                             | Q16540   |      |      | 0.93 | 0.93 |      | 5  | 40.5 | 1.27E-82 |
| IPI00293533 | 62 kDa nucleoporin                                                                   | P37198   | 1.84 | 0.74 | 0.95 | 1.18 | 0.58 | 6  | 12.6 | 2.5E-57  |
| IPI00293564 | 3-hydroxy-3-methylglutarate-CoA lyase                                                | P35914   | 1.30 | 1.30 | 1.28 | 1.30 | 0.01 | 5  | 18.2 | 4.58E-64 |
| IPI00293613 | NF-kappa-B-activating kinase                                                         | Q9UHD2   |      | 1.17 |      | 1.17 |      | 2  | 4    | 6.18E-23 |
| IPI00293655 | ATP-dependent RNA helicase DDX1                                                      | Q92499   | 0.93 | 1.00 | 1.01 | 0.98 | 0.04 | 22 | 36.6 | 4.2E-284 |
| IPI00293665 | Cytokeratin-6B                                                                       | P04259   |      |      | 0.44 | 0.44 |      | 12 | 22.2 | 9.5E-276 |
| IPI00293735 | Elongator complex protein 1                                                          | O95163   | 0.84 | 1.00 | 0.93 | 0.92 | 0.08 | 11 | 12.4 | 4.8E-93  |
| IPI00293746 | Multiple myeloma tumor-associated protein 2                                          | Q9BU76-1 |      | 1.04 | 1.00 | 1.02 | 0.02 | 2  | 9.9  | 9.44E-21 |
| IPI00293748 | Inositol (1,3,4,5)-tetrakisphosphate 3-phosphatase                                   | Q9UNW1-1 | 1.02 | 1.39 | 1.27 | 1.23 | 0.19 | 1  | 2.3  | 8.41E-14 |
| IPI00293817 | Gamma-soluble NSF attachment protein                                                 | Q99747   | 0.88 | 1.05 | 1.08 | 1.00 | 0.11 | 4  | 14.4 | 7.52E-76 |
| IPI00293921 | DNA topoisomerase 2-binding protein 1                                                | Q92547   |      |      | 1.25 | 1.25 |      | 2  | 2.4  | 6.43E-11 |
| IPI00293946 | Erasin                                                                               | Q92575   | 1.16 | 1.06 | 1.09 | 1.10 | 0.05 | 3  | 8.7  | 4.6E-111 |
| IPI00294008 | ZW10 interactor                                                                      | O95229   | 1.00 |      |      | 1.00 |      | 3  | 12.3 | 3.95E-19 |
| IPI00294158 | Biliverdin reductase A                                                               | P53004   | 1.04 | 1.20 | 1.21 | 1.15 | 0.09 | 10 | 38.9 | 2.6E-122 |
| IPI00294159 | Citrate transport protein                                                            | P53007   | 1.13 | 1.43 | 1.46 | 1.34 | 0.18 | 6  | 19   | 2.93E-26 |
| IPI00294186 | Serine beta-lactamase-like protein LACTB, mitochondrial                              | P83111-1 |      |      | 1.24 | 1.24 |      | 1  | 1.8  | 3.38E-05 |
| IPI00294211 | ATP-dependent RNA helicase DHX38                                                     | Q92620   | 0.94 |      | 0.97 | 0.96 | 0.03 | 3  | 3.2  | 7.34E-23 |
| IPI00294229 | RNA 3-terminal phosphate cyclase-like protein                                        | Q9Y2P8   | 0.90 | 0.65 | 0.80 | 0.78 | 0.13 | 4  | 11.5 | 1.28E-53 |
| IPI00294242 | 28S ribosomal protein S31, mitochondrial                                             | Q92665   | 1.20 | 0.87 | 0.85 | 0.97 | 0.19 | 6  | 22.3 | 1.6E-99  |
| IPI00294426 | 68 kDa TATA-binding protein-associated factor                                        | Q92804-1 | 1.13 | 0.97 | 0.91 | 1.00 | 0.11 | 6  | 16.6 | 5.6E-109 |
| IPI00294481 | UPF0172 protein FAM158A                                                              | Q9Y3B6   |      | 1.05 |      | 1.05 |      | 1  | 6.2  | 1.18E-12 |
| IPI00294495 | Ubiquitin-fold modifier-conjugating enzyme 1                                         | Q9Y3C8   | 1.02 | 1.27 | 1.28 | 1.19 | 0.15 | 4  | 24.6 | 9.25E-08 |
| IPI00294501 | 7-dehydrocholesterol reductase                                                       | Q9UBM7   | 2.19 |      | 2.06 | 2.13 | 0.09 | 3  | 6.9  | 4.59E-23 |
| IPI00294536 | cDNA FLJ51909, highly similar to Serine-threonine kinase receptor-associated protein | B4DNJ6   | 0.83 | 1.01 | 0.95 | 0.93 | 0.10 | 21 | 68   | 0        |
| IPI00294567 | F-box only protein 7                                                                 | Q9Y3I1   | 1.01 | 1.23 | 1.26 | 1.17 | 0.14 | 4  | 11.1 | 7.11E-48 |
| IPI00294610 | DnaJ homolog subfamily A member 3, mitochondrial                                     | Q96EY1-1 | 1.04 | 1.03 | 0.97 | 1.02 | 0.03 | 5  | 11.7 | 3.55E-30 |
| IPI00294618 | Papillary renal cell carcinoma translocation-associated gene protein                 | Q92733   | 1.72 | 1.01 | 0.96 | 1.23 | 0.43 | 7  | 35.8 | 3.98E-83 |



|             |                                               |           |      |      |      |      |      |    |      |          |
|-------------|-----------------------------------------------|-----------|------|------|------|------|------|----|------|----------|
| IPI00294619 | Protein TFG                                   | Q92734    | 1.47 |      | 0.93 | 1.20 | 0.38 | 8  | 29.5 | 1.06E-38 |
| IPI00294680 | Putative TRAF4-associated factor 1            | Q9Y448    | 0.88 | 0.96 | 0.85 | 0.89 | 0.06 | 7  | 32.6 | 2.9E-128 |
| IPI00294739 | Dendritic cell-derived IFNG-induced protein   | Q9Y3Z3-1  | 1.02 | 1.01 | 1.09 | 1.04 | 0.05 | 8  | 15.8 | 6.5E-103 |
| IPI00294742 | La ribonucleoprotein domain family member 7   | Q4G0J3-1  | 1.26 | 1.08 | 1.08 | 1.14 | 0.10 | 6  | 13.1 | 1.48E-68 |
| IPI00294744 | Deadenylating nuclease                        | O95453    |      | 0.68 |      | 0.68 |      | 3  | 6.1  | 3.43E-42 |
| IPI00294779 | Outer mitochondrial membrane protein porin 3  | Q9Y277-2  | 1.03 | 1.17 | 1.19 | 1.13 | 0.09 | 9  | 33.8 | 5.9E-109 |
| IPI00294834 | Aspartate beta-hydroxylase                    | Q12797    | 1.29 | 1.11 | 1.29 | 1.23 | 0.11 | 19 | 31.1 | 0        |
| IPI00294839 | Lysyl oxidase homolog 2                       | Q9Y4K0    | 0.84 | 0.90 | 0.87 | 0.87 | 0.03 | 6  | 12.7 | 1.8E-111 |
| IPI00294842 | Kinase homologous to SPS1/STE20               | Q9Y4K4    |      | 1.09 |      | 1.09 |      | 3  | 5.2  | 3.85E-06 |
| IPI00294879 | Ran GTPase-activating protein 1               | P46060    | 0.79 | 0.90 | 0.77 | 0.82 | 0.07 | 22 | 46.7 | 0        |
| IPI00294903 | Phosphomannomutase 1                          | Q92871    | 0.87 | 1.69 | 1.26 | 1.27 | 0.41 | 6  | 26   | 2.17E-51 |
| IPI00294911 | Iron-sulfur subunit of complex II             | P21912    | 0.89 | 1.01 | 0.99 | 0.96 | 0.06 | 8  | 29.3 | 9.84E-25 |
| IPI00294943 | H7-AP2                                        | Q9Y4X5    |      |      | 1.06 | 1.06 |      | 2  | 7.4  | 9.46E-58 |
| IPI00294955 | Glycine-rich protein                          | Q9Y4Z0    | 1.14 | 1.20 | 0.96 | 1.10 | 0.13 | 4  | 26.6 | 3.68E-09 |
| IPI00294962 | Cbl-interacting protein of 85 kDa             | Q96B97-1  | 1.08 | 1.39 | 1.18 | 1.21 | 0.16 | 8  | 20.6 | 4.61E-43 |
| IPI00294997 | nm23-H7                                       | Q9Y5B8    |      | 1.27 |      | 1.27 |      | 2  | 6.1  | 4.26E-12 |
| IPI00295066 | 39S ribosomal protein L48, mitochondrial      | Q96GC5    | 0.98 | 1.07 | 1.05 | 1.03 | 0.05 | 3  | 16   | 4.7E-110 |
| IPI00295081 | Gamma-1-tubulin                               | P23258    | 0.91 | 1.08 | 0.88 | 0.96 | 0.11 | 8  | 25.5 | 2.6E-149 |
| IPI00295098 | Protein APMCF1                                | Q9Y5M8    | 0.70 | 0.89 | 0.88 | 0.82 | 0.11 | 10 | 42.4 | 4.7E-257 |
| IPI00295209 | Sorting nexin-5                               | Q9Y5X3    | 0.82 | 0.99 | 1.17 | 0.99 | 0.17 | 9  | 23.8 | 2.68E-28 |
| IPI00295240 | Cysteine desulfurase, mitochondrial           | Q9Y697-1  | 1.26 | 1.19 | 1.09 | 1.18 | 0.09 | 3  | 8.8  | 2.49E-34 |
| IPI00295386 | 15-hydroxyprostaglandin dehydrogenase [NADP+] | P16152    | 1.05 | 1.18 | 1.19 | 1.14 | 0.08 | 19 | 71.1 | 0        |
| IPI00295387 | Cytokine receptor-like factor 3               | Q8IUI8    | 0.93 | 1.20 | 1.26 | 1.13 | 0.18 | 3  | 10.6 | 6.53E-39 |
| IPI00295400 | Interferon-induced protein 53                 | P23381-1  | 0.81 | 1.25 | 1.17 | 1.08 | 0.23 | 13 | 32.9 | 2.2E-302 |
| IPI00295457 | Myosin phosphatase Rho-interacting protein    | Q6WCCQ1-2 | 0.90 | 0.98 | 0.95 | 0.94 | 0.04 | 15 | 21.2 | 8.7E-131 |
| IPI00295497 | 3-alkyladenine DNA glycosylase                | P29372-1  | 0.85 | 1.38 | 1.15 | 1.12 | 0.27 | 6  | 31.9 | 2.32E-59 |
| IPI00295502 | Protein Wiz                                   | O95785-1  |      | 0.99 | 0.98 | 0.98 | 0.01 | 3  | 3.4  | 5.5E-09  |
| IPI00295542 | CALNUC                                        | Q02818    | 0.94 | 1.16 | 1.20 | 1.10 | 0.14 | 5  | 11.7 | 1.29E-57 |
| IPI00295575 | Collagen alpha-1(XI) chain                    | P12107-1  |      | 1.06 |      | 1.06 |      | 18 | 14.6 | 1.3E-258 |

|             |                                                                           |          |      |      |      |      |      |     |      |          |
|-------------|---------------------------------------------------------------------------|----------|------|------|------|------|------|-----|------|----------|
| IPI00295585 | 20 kDa CGG-binding protein                                                | Q9UFW8   | 1.09 | 1.47 | 1.48 | 1.35 | 0.22 | 11  | 65.3 | 1.07E-88 |
| IPI00295601 | BM88 antigen                                                              | Q8N111   | 2.91 |      |      | 2.91 |      | 3   | 45   | 9.09E-80 |
| IPI00295624 | Developmentally-regulated brain protein                                   | Q16643-2 |      | 0.91 |      | 0.91 |      | 29  | 49.3 | 0        |
| IPI00295741 | APP secretase                                                             | P07858   | 1.19 | 1.03 | 1.16 | 1.13 | 0.09 | 7   | 29.2 | 3.1E-130 |
| IPI00295772 | Lanosterol 14 alpha-demethylase                                           | Q16850-1 | 1.83 | 1.71 | 1.81 | 1.78 | 0.06 | 12  | 29.7 | 5.1E-204 |
| IPI00295849 | Geranylgeranyl transferase type II subunit beta                           | P53611   | 0.61 |      |      | 0.61 |      | 2   | 6.6  | 9.85E-11 |
| IPI00295851 | Beta-coat protein                                                         | P53618   | 0.85 | 1.03 | 0.97 | 0.95 | 0.09 | 30  | 37   | 0        |
| IPI00295857 | Alpha-coat protein                                                        | P53621-1 |      | 1.00 |      | 1.00 |      | 41  | 38   | 0        |
| IPI00295889 | Signal recognition particle 19 kDa protein                                | P09132   | 0.80 | 0.94 | 0.90 | 0.88 | 0.07 | 9   | 51.4 | 2.4E-255 |
| IPI00295940 | cDNA FLJ55508, highly similar to Sad1/unc-84-like protein 2               | B4E2A6   | 1.26 | 1.62 | 1.59 | 1.49 | 0.20 | 8   | 18.5 | 1.2E-174 |
| IPI00295992 | ATPase family AAA domain-containing protein 3A                            | Q9NVI7-2 | 0.83 | 0.78 | 0.80 | 0.80 | 0.02 | 19  | 37.4 | 2.2E-215 |
| IPI00296022 | Complex III subunit 6                                                     | P07919   | 0.95 | 0.86 | 0.86 | 0.89 | 0.05 | 5   | 67   | 2.01E-81 |
| IPI00296053 | Fumarate hydratase, mitochondrial                                         | P07954-1 | 1.00 | 1.03 | 1.02 | 1.02 | 0.01 | 16  | 39.8 | 0        |
| IPI00296099 | Thrombospondin-1                                                          | P07996   | 0.61 | 0.91 | 1.05 | 0.86 | 0.22 | 5   | 6.8  | 6.03E-21 |
| IPI00296157 | All-trans-13,14-dihydroretinol saturase                                   | Q6NUM9-1 | 1.16 | 1.14 | 1.38 | 1.22 | 0.13 | 4   | 9.2  | 9.07E-29 |
| IPI00296191 | Nef-binding protein 1                                                     | Q9UI12-1 | 0.94 | 1.23 | 1.31 | 1.16 | 0.19 | 5   | 18.2 | 2.3E-128 |
| IPI00296197 | BiP-associated protein                                                    | Q9H173   | 1.32 | 1.12 | 1.13 | 1.19 | 0.11 | 3   | 7.2  | 2.07E-21 |
| IPI00296259 | Endoplasmic reticulum stress-response protein 25                          | Q7Z7H5-1 | 0.77 | 1.17 | 1.51 | 1.15 | 0.37 | 4   | 18.9 | 3.39E-28 |
| IPI00296337 | DNA-dependent protein kinase catalytic subunit                            | P78527-1 | 0.94 | 0.90 | 0.93 | 0.92 | 0.02 | 116 | 31.9 | 0        |
| IPI00296374 | Zinc finger protein MCG4                                                  | O95159   |      | 0.95 | 0.90 | 0.93 | 0.04 | 2   | 10.3 | 2.6E-05  |
| IPI00296432 | IWS1-like protein                                                         | Q96ST2-1 | 1.51 | 0.84 | 0.82 | 1.06 | 0.39 | 5   | 6.3  | 5.7E-105 |
| IPI00296441 | Adenosine aminohydrolase                                                  | P00813   |      | 1.23 | 1.25 | 1.24 | 0.01 | 4   | 13.8 | 4.04E-22 |
| IPI00296485 | BPY2-interacting protein 1                                                | Q66K74   |      | 1.29 | 1.28 | 1.29 | 0.01 | 3   | 4.4  | 1.23E-11 |
| IPI00296526 | cDNA FLJ56394, highly similar to N-acetylglucosamine kinase (EC 2.7.1.59) | B4DLZ5   | 0.97 | 1.16 | 1.16 | 1.10 | 0.11 | 14  | 43.8 | 1.4E-246 |
| IPI00296535 | 2-hydroxyacyl-CoA lyase 1                                                 | Q9UJ83   |      | 0.93 |      | 0.93 |      | 3   | 5    | 3.16E-08 |
| IPI00296563 | GTP-binding protein GUF1 homolog                                          | Q8N442   | 0.87 | 1.07 |      | 0.97 | 0.14 | 4   | 9.3  | 3.03E-19 |
| IPI00296635 | 1,4-alpha-glucan-branching enzyme                                         | Q04446   | 0.96 | 1.07 | 1.18 | 1.07 | 0.11 | 22  | 37.7 | 3.6E-135 |
| IPI00296713 | Acrogranin                                                                | P28799-1 |      |      | 1.21 | 1.21 |      | 2   | 3.5  | 2.64E-06 |

|             |                                                                               |          |      |      |      |      |      |    |      |          |
|-------------|-------------------------------------------------------------------------------|----------|------|------|------|------|------|----|------|----------|
| IPI00296772 | ADP-ribosylation factor-binding protein GGA2                                  | Q9UJY4   |      | 1.52 | 1.36 | 1.44 | 0.12 | 5  | 11.6 | 7.29E-17 |
| IPI00296805 | Oculospanin                                                                   | Q9H1Z9   |      |      | 1.22 | 1.22 |      | 1  | 2.3  | 0.004008 |
| IPI00296830 | Leucine zipper protein 1                                                      | Q86V48-1 | 0.92 | 1.11 | 1.01 | 1.02 | 0.09 | 14 | 16.1 | 1.35E-73 |
| IPI00296907 | Palmitoyl-CoA oxidase                                                         | Q15067-1 | 0.86 | 0.99 | 0.76 | 0.87 | 0.12 | 3  | 6.2  | 2.46E-25 |
| IPI00296909 | 193 kDa vault protein                                                         | Q9UUK3   |      |      | 9.37 | 9.37 |      | 2  | 1    | 3.21E-18 |
| IPI00296922 | Laminin B1s chain                                                             | P55268   | 1.17 | 1.04 | 1.17 | 1.12 | 0.08 | 16 | 13.8 | 0        |
| IPI00296992 | AXL oncogene                                                                  | P30530-1 | 0.77 | 0.82 | 0.74 | 0.78 | 0.04 | 6  | 9.1  | 5.32E-79 |
| IPI00296999 | ATP synthase mitochondrial F1 complex assembly factor 2                       | Q8N5M1   |      |      | 2.50 | 2.50 |      | 2  | 7.3  | 2.76E-05 |
| IPI00297084 | Dolichyl-diphosphooligosaccharide--protein glycosyltransferase 48 kDa subunit | P39656   | 1.03 | 0.89 | 1.11 | 1.01 | 0.11 | 14 | 47.6 | 5.2E-209 |
| IPI00297211 | Sucrose nonfermenting protein 2 homolog                                       | O60264   | 0.84 | 0.99 | 0.93 | 0.92 | 0.07 | 39 | 34   | 0        |
| IPI00297241 | Nucleolar pre-ribosomal-associated protein 1                                  | O60287   |      | 0.92 | 0.77 | 0.84 | 0.11 | 5  | 3.3  | 1.88E-07 |
| IPI00297261 | Protein-tyrosine phosphatase 1B                                               | P18031   | 0.94 | 1.24 | 1.20 | 1.13 | 0.16 | 11 | 26.9 | 2.12E-65 |
| IPI00297333 | TBC1 domain family member 24                                                  | Q9ULP9-1 | 1.35 | 1.28 |      | 1.31 | 0.05 | 2  | 6.1  | 2.86E-06 |
| IPI00297357 | Liver-related putative tumor suppressor                                       | Q96BK5-1 |      |      | 0.58 | 0.58 |      | 3  | 16.5 | 2.96E-08 |
| IPI00297452 | Putative uncharacterized protein TFG                                          | C9JJP5   |      | 0.75 |      | 0.75 |      | 7  | 12.6 | 4.17E-23 |
| IPI00297455 | A-kinase anchor protein 8-like                                                | Q9ULX6   |      | 1.13 |      | 1.13 |      | 2  | 3.3  | 1.26E-06 |
| IPI00297475 | Dolichol-phosphate mannose synthase subunit 3                                 | Q9P2X0-2 | 0.90 | 1.20 | 1.19 | 1.10 | 0.17 | 2  | 13.1 | 3.14E-33 |
| IPI00297477 | U2 small nuclear ribonucleoprotein A                                          | P09661   | 1.21 | 1.04 | 1.10 | 1.11 | 0.09 | 15 | 39.2 | 1E-217   |
| IPI00297492 | B5                                                                            | P46977   | 1.01 | 0.78 | 1.05 | 0.94 | 0.15 | 6  | 7.9  | 2.82E-09 |
| IPI00297572 | Intron-binding protein aquarius                                               | O60306   | 1.06 | 0.66 | 0.96 | 0.89 | 0.21 | 5  | 5.9  | 5.05E-38 |
| IPI00297578 | 130 kDa GPBP-interacting protein                                              | Q4L180-1 |      | 1.00 | 0.62 | 0.81 | 0.27 | 4  | 4.2  | 2.3E-08  |
| IPI00297579 | Chromobox protein homolog 3                                                   | Q13185   | 1.18 | 1.18 | 1.07 | 1.14 | 0.06 | 12 | 46.4 | 0        |
| IPI00297617 | PH domain leucine-rich repeat-containing protein phosphatase 1                | O60346   | 0.58 |      |      | 0.58 |      | 1  | 1.7  | 7.19E-05 |
| IPI00297626 | Platelet Sec1 protein                                                         | O00186   | 0.95 | 1.24 | 1.22 | 1.14 | 0.16 | 3  | 6.1  | 1.65E-39 |
| IPI00297646 | Alpha-1 type I collagen                                                       | P02452   | 1.46 | 1.26 | 1.44 | 1.39 | 0.11 | 43 | 43.4 | 0        |
| IPI00297655 | Neurogenic locus notch homolog protein 2                                      | Q04721   | 1.51 | 0.95 | 1.17 | 1.21 | 0.28 | 3  | 2.3  | 1.34E-07 |
| IPI00297723 | Lung cancer antigen NY-LU-12                                                  | P78332   | 1.09 |      |      | 1.09 |      | 2  | 3    | 2.13E-09 |
| IPI00297779 | CCT-beta                                                                      | P78371   | 0.82 | 0.91 | 0.85 | 0.86 | 0.05 | 39 | 76.1 | 0        |
| IPI00297851 | ATP-dependent helicase CHD1                                                   | O14646-1 | 0.80 |      | 0.73 | 0.76 | 0.05 | 4  | 3.9  | 5.14E-31 |

|             |                                                                                  |          |      |      |      |      |      |    |      |          |
|-------------|----------------------------------------------------------------------------------|----------|------|------|------|------|------|----|------|----------|
| IPI00297900 | DEAD box protein 10                                                              | Q13206   | 0.74 | 0.80 | 0.78 | 0.77 | 0.03 | 9  | 13.7 | 2.41E-70 |
| IPI00297982 | Eukaryotic translation initiation factor 2 subunit 3                             | P41091   | 0.93 | 0.88 | 0.94 | 0.92 | 0.03 | 23 | 54.9 | 3.5E-278 |
| IPI00298058 | DRB sensitivity-inducing factor 160 kDa subunit                                  | O00267-1 | 0.98 | 1.00 | 0.74 | 0.91 | 0.14 | 5  | 7.6  | 1.65E-82 |
| IPI00298111 | Sorting nexin-6                                                                  | Q9UNH7   | 1.03 | 1.14 | 1.19 | 1.12 | 0.08 | 13 | 33.3 | 3.2E-213 |
| IPI00298202 | Acyl-CoA thioesterase 8                                                          | O14734   | 0.94 |      | 0.84 | 0.89 | 0.07 | 2  | 12.2 | 6.65E-23 |
| IPI00298281 | Laminin B2 chain                                                                 | P11047   | 0.79 | 0.81 | 0.84 | 0.82 | 0.03 | 24 | 22.2 | 0        |
| IPI00298289 | Foocen                                                                           | Q9NQC3-2 |      | 0.96 |      | 0.96 |      | 8  | 32.4 | 2.7E-70  |
| IPI00298308 | Aldehyde dehydrogenase family 1 member L2                                        | Q35Y69-1 | 0.90 | 0.95 | 1.21 | 1.02 | 0.16 | 2  | 2.9  | 3.71E-28 |
| IPI00298406 | Hydroxyacyl-coenzyme A dehydrogenase, mitochondrial                              | Q16836-2 | 1.21 |      |      | 1.21 |      | 6  | 14.6 | 1.13E-19 |
| IPI00298409 | Phosducin-like protein                                                           | Q13371   | 0.81 | 1.65 | 1.45 | 1.30 | 0.44 | 2  | 7.6  | 2.11E-78 |
| IPI00298423 | Dihydrolipoamide dehydrogenase-binding protein of pyruvate dehydrogenase complex | O00330   | 0.99 | 1.14 | 1.17 | 1.10 | 0.09 | 5  | 12.6 | 8.4E-86  |
| IPI00298520 | Archain 1, isoform CRA_a                                                         | B0YIW6   | 0.83 | 1.10 | 1.03 | 0.99 | 0.14 | 22 | 36.8 | 2.5E-199 |
| IPI00298547 | Oncogene DJ1                                                                     | Q99497   | 1.05 | 1.00 | 1.04 | 1.03 | 0.02 | 15 | 61.4 | 3E-277   |
| IPI00298558 | Cerebral cavernous malformations 3 protein                                       | Q9BUL8   | 1.09 | 1.00 | 1.06 | 1.05 | 0.05 | 6  | 39.6 | 6.71E-68 |
| IPI00298612 | [3-methyl-2-oxobutanoate dehydrogenase [lipoamide]] kinase, mitochondrial        | O14874   |      | 1.00 |      | 1.00 |      | 2  | 7.3  | 0.000714 |
| IPI00298618 | Eukaryotic translation initiation factor 1A domain-containing protein            | Q8N9N8   | 0.76 | 0.90 | 0.86 | 0.84 | 0.07 | 5  | 38.8 | 5.7E-131 |
| IPI00298625 | Tyrosine-protein kinase Lyn                                                      | P07948-1 | 0.89 |      |      | 0.89 |      | 4  | 7.6  | 1.74E-19 |
| IPI00298662 | UPF0449 protein C19orf25                                                         | Q9UFG5-1 |      |      | 0.95 | 0.95 |      | 2  | 26.1 | 8.29E-18 |
| IPI00298731 | MHC class I region proline-rich protein CAT53                                    | Q96QC0   | 1.22 | 1.34 | 1.06 | 1.20 | 0.14 | 6  | 9.9  | 4.27E-49 |
| IPI00298788 | Double-stranded RNA-binding protein 76                                           | Q12906-1 | 2.15 | 0.86 | 1.05 | 1.35 | 0.70 | 32 | 41.2 | 0        |
| IPI00298851 | CD151 antigen                                                                    | P48509   | 1.18 | 0.95 | 1.30 | 1.14 | 0.18 | 3  | 9.1  | 6.13E-05 |
| IPI00298883 | 5-azacytidine-induced protein 1                                                  | Q9UPN4-1 |      |      | 1.27 | 1.27 |      | 3  | 3.1  | 7.02E-05 |
| IPI00298928 | Leucine-rich repeat protein SHOC-2                                               | Q9UQ13-1 |      | 0.74 |      | 0.74 |      | 2  | 5.7  | 1.44E-29 |
| IPI00298935 | JmjC domain-containing histone demethylation protein 2B                          | Q7LBC6-1 | 1.23 | 0.82 |      | 1.03 | 0.29 | 2  | 1.9  | 2.39E-10 |
| IPI00298940 | Aurora kinase A                                                                  | O14965   | 0.75 | 1.23 | 1.11 | 1.03 | 0.25 | 5  | 18.4 | 3.55E-30 |
| IPI00298946 | Down syndrome critical region protein 3                                          | O14972   | 1.85 | 1.41 | 1.17 | 1.48 | 0.35 | 2  | 10.4 | 5.07E-53 |
| IPI00298949 | Cyclin-G-associated kinase                                                       | O14976   | 1.06 |      |      | 1.06 |      | 2  | 3.2  | 0.000191 |

|             |                                                              |          |      |      |      |      |      |     |      |          |
|-------------|--------------------------------------------------------------|----------|------|------|------|------|------|-----|------|----------|
| IPI00298961 | Chromosome region maintenance 1 protein homolog              | O14980   | 0.95 | 1.09 | 1.08 | 1.04 | 0.08 | 32  | 37.9 | 0        |
| IPI00298991 | WASH complex subunit 7                                       | Q2M389-1 | 1.11 | 1.16 | 1.19 | 1.15 | 0.04 | 9   | 10.3 | 2.52E-93 |
| IPI00298994 | Talin-1                                                      | Q9Y490   | 0.92 | 1.00 | 1.00 | 0.97 | 0.05 | 130 | 65.1 | 0        |
| IPI00299000 | Cell cycle protein p38-2G4 homolog                           | Q9UQ80   | 0.89 | 0.93 | 0.88 | 0.90 | 0.02 | 25  | 60.9 | 0        |
| IPI00299003 | Protein WAVE-3                                               | Q9UPY6   | 1.18 |      |      | 1.18 |      | 2   | 3    | 6.26E-14 |
| IPI00299024 | 22 kDa neuronal tissue-enriched acidic protein               | P80723-1 | 1.11 |      | 1.10 | 1.10 | 0.01 | 2   | 22   | 2.54E-09 |
| IPI00299033 | Importin alpha Q2                                            | O00505   | 3.76 | 1.09 | 1.09 | 1.98 | 1.54 | 8   | 21.7 | 5E-123   |
| IPI00299063 | Stromal interaction molecule 1                               | Q13586   | 1.25 | 1.15 |      | 1.20 | 0.07 | 3   | 6.1  | 2.77E-11 |
| IPI00299084 | Protein DB83                                                 | P57088   | 0.68 | 0.81 | 0.94 | 0.81 | 0.13 | 5   | 17.4 | 4.71E-58 |
| IPI00299086 | Melanoma differentiation-associated protein 9                | O00560-1 | 1.60 | 2.04 | 1.76 | 1.80 | 0.22 | 7   | 45.6 | 6.1E-187 |
| IPI00299088 | Brain-specific angiogenesis inhibitor 1-associated protein 2 | Q9UQB8-1 | 0.92 | 1.17 | 0.94 | 1.01 | 0.14 | 18  | 44   | 1E-160   |
| IPI00299095 | Sorting nexin-2                                              | O60749   | 1.12 | 1.11 | 1.05 | 1.09 | 0.03 | 17  | 35.5 | 1.7E-220 |
| IPI00299145 | Cytokeratin-6C                                               | P48668   |      | 0.29 |      | 0.29 |      | 20  | 32.3 | 0        |
| IPI00299149 | HSMT3                                                        | P61956   | 1.15 | 1.07 | 0.96 | 1.06 | 0.10 | 3   | 27.4 | 4.5E-123 |
| IPI00299155 | Macropain subunit C9                                         | P25789   | 0.92 | 1.09 | 1.09 | 1.03 | 0.10 | 12  | 54   | 1.7E-189 |
| IPI00299158 | Nectin-like protein 5                                        | P15151-1 | 0.89 | 0.96 | 0.99 | 0.95 | 0.05 | 3   | 8.4  | 9.3E-145 |
| IPI00299193 | Mitochondrial outer membrane protein 25                      | P57105   | 0.96 |      |      | 0.96 |      | 3   | 27.6 | 6.07E-06 |
| IPI00299214 | Thymidine kinase, cytosolic                                  | P04183   | 0.94 | 1.62 | 1.61 | 1.39 | 0.39 | 13  | 57.7 | 8.8E-284 |
| IPI00299219 | CCN family member 1                                          | O00622   | 0.46 | 0.61 | 0.66 | 0.58 | 0.10 | 7   | 22.6 | 1.94E-56 |
| IPI00299254 | Eukaryotic translation initiation factor 5B                  | O60841   | 1.03 | 0.93 | 0.96 | 0.97 | 0.05 | 20  | 22.2 | 4.3E-171 |
| IPI00299263 | ADP-ribosylation factor GTPase-activating protein 3          | Q9NP61   | 0.80 |      | 0.93 | 0.87 | 0.09 | 9   | 22.9 | 2.9E-116 |
| IPI00299299 | Heat shock 70 kDa protein 13                                 | P48723   | 1.03 | 1.30 | 1.28 | 1.20 | 0.15 | 4   | 9.1  | 2.9E-13  |
| IPI00299387 | Protein M5-14                                                | Q9NPL8   | 0.87 | 0.97 | 0.86 | 0.90 | 0.06 | 7   | 29.5 | 1.26E-43 |
| IPI00299402 | Pyruvate carboxylase, mitochondrial                          | P11498   | 1.11 | 1.18 | 1.28 | 1.19 | 0.09 | 7   | 8.1  | 2.39E-46 |
| IPI00299413 | GA-binding protein alpha chain                               | Q06546   | 0.91 | 1.21 | 1.28 | 1.13 | 0.19 | 3   | 10.1 | 4.6E-22  |
| IPI00299417 | Functional spliceosome-associated protein 79                 | Q13769   |      | 0.88 | 1.01 | 0.94 | 0.09 | 3   | 7.2  | 6.74E-29 |
| IPI00299463 | Cell cycle regulatory protein p95                            | O60934   |      |      | 1.40 | 1.40 |      | 2   | 3.3  | 6.83E-12 |
| IPI00299465 | Leucine zipper transcription factor-like protein 1           | Q9NQ48   | 1.43 | 1.24 | 1.05 | 1.24 | 0.19 | 9   | 38.5 | 2.6E-167 |

|             |                                                          |          |      |      |      |      |      |    |      |          |
|-------------|----------------------------------------------------------|----------|------|------|------|------|------|----|------|----------|
| IPI00299507 | Barren homolog protein 1                                 | Q15003   | 1.01 | 1.25 | 0.96 | 1.07 | 0.15 | 12 | 23.9 | 2E-113   |
| IPI00299512 | Neurofibromatosis-related protein NF-1                   | P21359-1 | 1.03 | 1.10 |      | 1.06 | 0.05 | 2  | 1.1  | 5E-05    |
| IPI00299517 | Abraxas brother protein 1                                | Q15018   | 1.00 |      |      | 1.00 |      | 2  | 5.8  | 1.81E-09 |
| IPI00299524 | Chromosome condensation-related SMC-associated protein 1 | Q15021   | 1.04 | 1.05 | 1.09 | 1.06 | 0.03 | 30 | 29.5 | 0        |
| IPI00299554 | Kinesin-like protein KIF14                               | Q15058   |      | 1.25 |      | 1.25 |      | 2  | 1.4  | 0.000121 |
| IPI00299571 | Protein disulfide isomerase P5                           | Q15084-2 | 1.16 | 1.03 | 1.15 | 1.11 | 0.07 | 19 | 41.1 | 0        |
| IPI00299573 | 60S ribosomal protein L7a                                | P62424   | 0.84 | 0.86 | 0.90 | 0.87 | 0.03 | 26 | 59   | 0        |
| IPI00299608 | 26S proteasome non-ATPase regulatory subunit 1           | Q99460-1 | 1.03 | 1.00 | 1.01 | 1.01 | 0.02 | 28 | 42.3 | 0        |
| IPI00299635 | Baculoviral IAP repeat-containing protein 6              | Q9NR09   |      | 0.13 | 0.57 | 0.35 | 0.31 | 2  | 1.2  | 0.001555 |
| IPI00299667 | Vesicle-associated membrane protein 4                    | O75379-1 | 1.07 | 0.92 | 1.28 | 1.09 | 0.18 | 3  | 26.2 | 7.1E-142 |
| IPI00299738 | Procollagen C-endopeptidase enhancer 1                   | Q15113   | 1.62 | 1.95 | 1.78 | 1.78 | 0.16 | 10 | 30.1 | 3.99E-78 |
| IPI00299904 | CDC47 homolog                                            | P33993-1 | 1.06 | 1.23 | 1.24 | 1.18 | 0.10 | 27 | 43.4 | 5.7E-294 |
| IPI00299977 | 14 kDa phosphohistidine phosphatase                      | Q9NRX4   | 0.96 | 1.24 | 1.25 | 1.15 | 0.16 | 3  | 21.6 | 2.09E-41 |
| IPI00300074 | Phenylalanine--tRNA ligase beta chain                    | Q9NSD9   | 0.85 | 0.95 | 0.94 | 0.91 | 0.06 | 22 | 38.5 | 1.3E-139 |
| IPI00300078 | Periodic tryptophan protein 2 homolog                    | Q15269   | 0.72 | 0.91 | 0.89 | 0.84 | 0.11 | 7  | 8.8  | 2.71E-80 |
| IPI00300094 | Large subunit GTPase 1 homolog                           | Q9H089   | 0.88 | 0.99 |      | 0.94 | 0.08 | 2  | 3.6  | 0.00335  |
| IPI00300096 | GTP-binding protein RAY                                  | Q15286   | 1.01 | 1.10 | 1.10 | 1.07 | 0.05 | 12 | 54.2 | 8.3E-155 |
| IPI00300127 | N-acetyltransferase 10                                   | Q9H0A0   | 0.80 | 0.93 | 0.80 | 0.84 | 0.07 | 28 | 34.7 | 0        |
| IPI00300278 | Activator-recruited cofactor 32 kDa component            | Q96G25-2 | 1.11 | 0.92 | 0.99 | 1.01 | 0.10 | 6  | 27.6 | 2.2E-103 |
| IPI00300299 | Microsomal signal peptidase 22/23 kDa subunit            | P61009   | 0.98 | 0.96 | 1.01 | 0.98 | 0.03 | 4  | 20.6 | 1.22E-34 |
| IPI00300333 | Pancreatic differentiation protein 2                     | Q8N7H5-1 | 5.20 | 1.12 | 0.95 | 2.42 | 2.40 | 6  | 14.1 | 4E-24    |
| IPI00300341 | Elongin 15 kDa subunit                                   | Q15369   | 0.89 | 1.08 | 1.01 | 0.99 | 0.10 | 7  | 58.9 | 1.2E-275 |
| IPI00300371 | Pre-mRNA-splicing factor SF3b 130 kDa subunit            | Q15393-1 | 1.02 | 0.99 | 1.02 | 1.01 | 0.02 | 37 | 34.5 | 0        |
| IPI00300504 | Nonsense mRNA reducing factor 2                          | Q9HAU5-1 | 1.37 | 0.92 | 1.17 | 1.15 | 0.23 | 3  | 2.9  | 1.66E-06 |
| IPI00300562 | Ras-related protein Rab-3B                               | P20337   | 0.78 | 0.91 | 0.88 | 0.86 | 0.07 | 11 | 48.9 | 5E-230   |
| IPI00300567 | 3,2-trans-enoyl-CoA isomerase, mitochondrial             | P42126-1 | 1.10 | 1.10 | 1.16 | 1.12 | 0.03 | 5  | 17.9 | 1.7E-126 |
| IPI00300585 | GTPase-interacting protein 2                             | Q9HB90   | 1.22 |      |      | 1.22 |      | 3  | 9.3  | 9.01E-09 |
| IPI00300659 | Cell division cycle protein 73 homolog                   | Q6P1J9   | 0.82 | 1.16 | 1.01 | 0.99 | 0.17 | 14 | 24.9 | 3.61E-36 |
| IPI00300697 | RING finger protein 108                                  | Q9H270   |      | 1.47 | 1.23 | 1.35 | 0.17 | 2  | 3.2  | 1.2E-27  |

|             |                                                                                              |          |      |      |      |      |      |    |      |          |
|-------------|----------------------------------------------------------------------------------------------|----------|------|------|------|------|------|----|------|----------|
| IPI00300725 | Cytokeratin-6A                                                                               | P02538   | 2.84 |      |      | 2.84 |      | 20 | 32.3 | 0        |
| IPI00300763 | Methionine aminopeptidase                                                                    | B4DUX5   | 0.95 | 0.98 | 1.02 | 0.98 | 0.04 | 18 | 51.4 | 3.6E-255 |
| IPI00300789 | Double-stranded RNA-binding protein Staufeu homolog 2                                        | Q9NUL3-1 | 0.99 | 1.66 |      | 1.32 | 0.47 | 2  | 4.7  | 3.05E-07 |
| IPI00301051 | NHL repeat-containing protein 2                                                              | Q8NBF2-1 |      | 1.10 | 0.96 | 1.03 | 0.10 | 4  | 10.9 | 1.16E-25 |
| IPI00301058 | Vasodilator-stimulated phosphoprotein                                                        | P50552   | 0.93 | 1.19 | 1.12 | 1.08 | 0.13 | 16 | 43.4 | 0        |
| IPI00301139 | Activator-recruited cofactor 77 kDa component                                                | Q9NVC6-1 | 0.99 | 1.09 | 1.13 | 1.07 | 0.07 | 4  | 9.2  | 6.76E-25 |
| IPI00301144 | C-alpha-formylglycine-generating enzyme 1                                                    | Q8NBK3-1 | 0.98 | 1.44 | 1.12 | 1.18 | 0.24 | 4  | 15.2 | 4.03E-46 |
| IPI00301163 | CAP10-like 46 kDa protein                                                                    | Q8NBL1   | 1.16 | 0.73 | 1.19 | 1.02 | 0.26 | 5  | 15.3 | 7.1E-167 |
| IPI00301263 | Aspartate carbamoyltransferase                                                               | P27708   | 0.83 | 0.94 | 0.90 | 0.89 | 0.06 | 23 | 13.6 | 3.9E-141 |
| IPI00301280 | Protein LUMA                                                                                 | Q9BTV4   | 1.07 | 0.97 | 1.12 | 1.05 | 0.08 | 19 | 54.2 | 0        |
| IPI00301305 | Nasopharyngeal carcinoma-associated gene 20 protein                                          | Q9NZ09-1 |      | 1.05 | 1.27 | 1.16 | 0.16 | 3  | 8.5  | 3.58E-91 |
| IPI00301311 | HLA-DR-associated protein II                                                                 | Q01105-2 | 1.24 | 1.01 | 1.04 | 1.10 | 0.12 | 12 | 37.9 | 0        |
| IPI00301323 | ATP-dependent RNA helicase DDX18                                                             | Q9NVP1   | 0.88 | 0.86 | 0.93 | 0.89 | 0.03 | 8  | 12.7 | 1.29E-40 |
| IPI00301364 | Cyclin-A/CDK2-associated protein p19                                                         | P63208-1 | 0.95 | 1.18 | 1.07 | 1.07 | 0.12 | 12 | 66.9 | 6.8E-211 |
| IPI00301419 | COP9 signalosome complex subunit 7a                                                          | Q9UBW8   | 1.01 | 1.12 | 1.15 | 1.09 | 0.07 | 9  | 38.9 | 3E-101   |
| IPI00301428 | cDNA FLJ60315                                                                                | B4DNR0   |      |      | 1.18 | 1.18 |      | 1  | 5.4  | 0.000492 |
| IPI00301434 | Bola-like protein 2                                                                          | Q9H3K6-1 | 0.84 | 1.11 | 0.97 | 0.98 | 0.13 | 5  | 39.5 | 9.84E-96 |
| IPI00301489 | Uroporphyrinogen decarboxylase                                                               | P06132   | 1.25 | 1.27 | 1.15 | 1.23 | 0.07 | 10 | 31.3 | 7.4E-101 |
| IPI00301561 | Opa-interacting protein 1                                                                    | Q15654   | 0.91 | 1.12 | 0.91 | 0.98 | 0.13 | 11 | 38.7 | 9.11E-76 |
| IPI00301579 | cDNA FLJ59142, highly similar to Epididymal secretory protein E1                             | B4DV10   | 1.58 | 1.40 | 1.42 | 1.47 | 0.10 | 5  | 35.3 | 9.2E-90  |
| IPI00301609 | Nercc1 kinase                                                                                | Q8TD19   | 1.22 | 1.53 |      | 1.38 | 0.22 | 3  | 4.2  | 2.4E-23  |
| IPI00301936 | cDNA FLJ60076, highly similar to ELAV-like protein 1                                         | B4DVB8   | 1.02 | 1.09 | 1.06 | 1.06 | 0.04 | 15 | 44.2 | 2.4E-207 |
| IPI00302030 | Ras-related protein Rab-30                                                                   | Q15771   | 9.58 |      |      | 9.58 |      | 3  | 15.8 | 2.2E-18  |
| IPI00302047 | cDNA FLJ77693, highly similar to Homo sapiens calpastatin (CAST), transcript variant 3, mRNA | A8K8C4   | 1.57 | 0.98 | 1.16 | 1.24 | 0.30 | 13 | 49.7 | 0        |
| IPI00302176 | H/ACA ribonucleoprotein complex subunit 1                                                    | Q9NY12-1 | 0.89 | 0.81 | 0.77 | 0.82 | 0.06 | 7  | 35.5 | 1.95E-68 |
| IPI00302238 | Apoptosis-antagonizing transcription factor                                                  | Q9NY61   | 1.13 | 1.04 | 0.88 | 1.02 | 0.13 | 4  | 13   | 4.1E-95  |
| IPI00302281 | ATP-dependent 61 kDa nucleolar RNA helicase                                                  | Q9NY93   | 0.65 | 1.01 | 0.87 | 0.84 | 0.18 | 5  | 10.4 | 2.69E-77 |
| IPI00302329 | Myosin heavy chain 8                                                                         | P13535   |      |      | 0.94 | 0.94 |      | 4  | 2.3  | 2.59E-05 |

|             |                                                                                                               |          |      |      |      |      |      |    |      |          |
|-------------|---------------------------------------------------------------------------------------------------------------|----------|------|------|------|------|------|----|------|----------|
| IPI00302453 | Axonemal beta dynein heavy chain 9                                                                            | Q9NYC9-1 | 0.99 | 1.12 |      | 1.05 | 0.09 | 4  | 0.8  | 0.002801 |
| IPI00302605 | Solute carrier family 30 member 7                                                                             | Q8NEW0   | 0.66 | 0.94 | 0.89 | 0.83 | 0.15 | 2  | 6.6  | 2.62E-92 |
| IPI00302647 | Coiled-coil and C2 domain-containing protein 1A                                                               | Q6P1N0-1 | 1.00 | 1.36 | 1.18 | 1.18 | 0.18 | 14 | 21   | 1.7E-74  |
| IPI00302652 | Cofactor required for Sp1 transcriptional activation subunit 8                                                | Q6P2C8-1 | 1.14 |      | 1.23 | 1.19 | 0.06 | 2  | 9.6  | 3.29E-08 |
| IPI00302658 | HAUS augmin-like complex subunit 4                                                                            | Q9H6D7-1 | 0.76 |      | 1.34 | 1.05 | 0.40 | 3  | 11.3 | 3.65E-43 |
| IPI00302674 | Coiled-coil domain-containing protein 134                                                                     | Q9H6E4   | 1.42 | 1.19 | 1.30 | 1.30 | 0.11 | 7  | 28.8 | 3.07E-66 |
| IPI00302688 | Enoyl-CoA hydratase domain-containing protein 1                                                               | Q9NTX5-1 | 0.93 | 1.01 | 0.91 | 0.95 | 0.05 | 9  | 42.7 | 3.5E-192 |
| IPI00302690 | Actin-related protein 10                                                                                      | Q9NZ32   |      |      | 1.14 | 1.14 |      | 2  | 7.9  | 1.36E-12 |
| IPI00302712 | Cytoplasmic dynein 1 intermediate chain 2                                                                     | Q13409-2 |      |      | 1.07 | 1.07 |      | 14 | 26.9 | 1.9E-158 |
| IPI00302850 | Small nuclear ribonucleoprotein Sm D1                                                                         | P62314   | 0.98 | 0.88 | 0.97 | 0.94 | 0.06 | 3  | 28.6 | 1.5E-26  |
| IPI00302927 | CCT-delta                                                                                                     | P50991   | 0.84 | 0.91 | 0.84 | 0.86 | 0.04 | 34 | 66   | 0        |
| IPI00303099 | Borealin                                                                                                      | Q53HL2   | 1.09 | 1.62 | 1.34 | 1.35 | 0.26 | 7  | 27.5 | 2E-40    |
| IPI00303158 | CMP-N-acetylneuraminic acid synthase                                                                          | Q8NFW8-1 | 0.92 | 1.35 | 1.16 | 1.14 | 0.22 | 4  | 15.2 | 3.41E-56 |
| IPI00303195 | Syncoilin                                                                                                     | Q9H7C4   | 1.12 | 0.84 |      | 0.98 | 0.20 | 3  | 5.8  | 4.3E-06  |
| IPI00303207 | 2-5-oligoadenylate-binding protein                                                                            | P61221   | 0.79 | 0.91 | 0.86 | 0.85 | 0.06 | 28 | 52.1 | 0        |
| IPI00303258 | Dyxin                                                                                                         | Q9NZU5   | 1.34 | 1.06 |      | 1.20 | 0.20 | 3  | 12.9 | 2.62E-06 |
| IPI00303292 | Importin subunit alpha-1                                                                                      | P52294   | 1.01 | 1.18 | 1.16 | 1.12 | 0.09 | 10 | 19.9 | 8.2E-237 |
| IPI00303297 | DnaJ homolog subfamily C member 25                                                                            | Q9H1X3-3 |      |      | 1.80 | 1.80 |      | 2  | 11.8 | 5.49E-05 |
| IPI00303300 | 65 kDa FK506-binding protein                                                                                  | Q96AY3   | 1.16 | 1.18 | 1.13 | 1.16 | 0.03 | 14 | 28.2 | 4.3E-158 |
| IPI00303318 | L1                                                                                                            | Q9NUQ9   | 1.09 | 1.28 | 1.12 | 1.16 | 0.10 | 10 | 41.7 | 0        |
| IPI00303402 | Phosphorylated adapter RNA export protein                                                                     | Q9H814   | 1.13 | 1.08 | 1.06 | 1.09 | 0.03 | 4  | 12.2 | 8.19E-31 |
| IPI00303439 | cDNA FLJ13963 fis, clone Y79AA1001299, highly similar to Homo sapiens integrase interactor 1b protein (INI1B) | Q9H836   | 0.96 | 1.02 | 0.96 | 0.98 | 0.03 | 7  | 25.9 | 3.28E-46 |
| IPI00303476 | ATP synthase subunit beta, mitochondrial                                                                      | P06576   | 1.18 | 0.89 | 1.03 | 1.03 | 0.15 | 25 | 70.9 | 0        |
| IPI00303568 | Microsomal prostaglandin E synthase 2                                                                         | Q9H7Z7   | 0.99 | 0.86 | 0.81 | 0.89 | 0.09 | 8  | 30.2 | 1.2E-103 |
| IPI00303602 | Axin interaction partner and dorsalization antagonist                                                         | Q96BJ3-1 | 1.07 | 1.20 | 1.08 | 1.12 | 0.07 | 10 | 35   | 3.87E-97 |
| IPI00303753 | Hcp beta-lactamase-like protein C1orf163                                                                      | Q96BR5   | 0.82 | 0.78 | 0.69 | 0.76 | 0.07 | 7  | 36.8 | 6.2E-99  |
| IPI00303813 | Nucleolar protein 11                                                                                          | Q9H8H0   | 0.68 | 0.87 | 0.79 | 0.78 | 0.09 | 5  | 9.9  | 8.7E-104 |



|             |                                                            |          |      |      |      |      |      |    |      |          |
|-------------|------------------------------------------------------------|----------|------|------|------|------|------|----|------|----------|
| IPI00303832 | RNA polymerase-associated protein RTF1 homolog             | Q92541   | 1.04 | 1.28 | 1.20 | 1.17 | 0.12 | 8  | 13.9 | 1.83E-38 |
| IPI00303867 | Protein FAM176A                                            | Q9H8M9   | 0.93 | 1.11 | 0.84 | 0.96 | 0.14 | 2  | 11.2 | 5.19E-15 |
| IPI00303868 | Glycogen [starch] synthase, muscle                         | P13807   | 0.80 | 1.05 | 0.85 | 0.90 | 0.13 | 13 | 25.9 | 8E-130   |
| IPI00303882 | 47 kDa mannose 6-phosphate receptor-binding protein        | O60664-1 | 1.40 | 1.13 | 1.08 | 1.21 | 0.17 | 22 | 69.4 | 0        |
| IPI00303954 | Cytochrome b5 outer mitochondrial membrane isoform         | O43169   | 1.50 | 1.38 | 1.40 | 1.43 | 0.06 | 4  | 48   | 4.07E-66 |
| IPI00304082 | Isochorismatase domain-containing protein 1                | Q96CN7   | 0.91 | 1.18 | 1.09 | 1.06 | 0.13 | 5  | 20.5 | 6.23E-76 |
| IPI00304171 | Core histone macro-H2A.1                                   | O75367-1 | 1.25 | 1.14 | 1.14 | 1.18 | 0.07 | 15 | 40.9 | 8.4E-122 |
| IPI00304181 | Eukaryotic translation initiation factor 2C 3              | Q9H9G7   |      | 0.69 |      | 0.69 |      | 2  | 3.7  | 1.53E-55 |
| IPI00304187 | RNA-binding motif protein 28                               | Q9NW13   | 0.72 | 0.98 | 0.86 | 0.85 | 0.13 | 10 | 14.5 | 2.54E-88 |
| IPI00304227 | Cadherin-11                                                | P55287-1 | 1.83 |      |      | 1.83 |      | 1  | 2.4  | 1.77E-05 |
| IPI00304232 | Ribosome biogenesis protein WDR12                          | Q9GZL7   | 0.69 | 0.84 | 0.78 | 0.77 | 0.08 | 11 | 31.2 | 2.38E-83 |
| IPI00304264 | Degradation in endoplasmic reticulum protein 2             | Q9GZP9   | 0.98 | 0.92 | 1.03 | 0.98 | 0.05 | 3  | 17.2 | 1.94E-35 |
| IPI00304267 | Nucleoredoxin                                              | Q6DKJ4-1 | 1.08 | 1.20 | 1.14 | 1.14 | 0.06 | 9  | 29.2 | 3.1E-144 |
| IPI00304306 | DnaJ homolog subfamily C member 19                         | Q96DA6   | 0.88 | 0.77 | 0.87 | 0.84 | 0.06 | 3  | 26.7 | 3.87E-08 |
| IPI00304379 | Deubiquitinating enzyme 1                                  | O94782   |      | 0.97 |      | 0.97 |      | 2  | 3.6  | 0.000221 |
| IPI00304409 | Calcium-regulated heat stable protein 1                    | Q9Y2V2   | 1.48 |      | 1.12 | 1.30 | 0.25 | 3  | 23.8 | 9.47E-21 |
| IPI00304417 | Isocitrate dehydrogenase [NAD] subunit beta, mitochondrial | O43837-1 | 0.84 | 1.10 |      | 0.97 | 0.18 | 5  | 18.3 | 3.01E-81 |
| IPI00304435 | Protein NipSnap homolog 1                                  | Q9BPW8   | 1.24 | 1.12 | 1.22 | 1.19 | 0.06 | 6  | 16.5 | 1.05E-43 |
| IPI00304483 | Polyadenylate-binding protein-interacting protein 2        | Q9BPZ3   | 1.57 |      |      | 1.57 |      | 1  | 11   | 3.46E-58 |
| IPI00304493 | p49/STRAP                                                  | Q8NEF9   | 0.76 |      | 0.98 | 0.87 | 0.15 | 2  | 6.1  | 0.002847 |
| IPI00304577 | 100 kDa coated vesicle protein A                           | O95782-1 | 1.04 | 1.17 | 1.10 | 1.10 | 0.07 | 29 | 35.8 | 1.1E-267 |
| IPI00304589 | 182 kDa tankyrase-1-binding protein                        | Q9C0C2-1 | 1.51 | 1.26 | 1.17 | 1.31 | 0.18 | 26 | 24.5 | 0        |
| IPI00304596 | 54 kDa nuclear RNA- and DNA-binding protein                | Q15233   | 1.08 | 1.00 | 1.01 | 1.03 | 0.04 | 27 | 49.3 | 0        |
| IPI00304612 | 23 kDa highly basic protein                                | P40429   | 0.88 | 0.85 | 0.84 | 0.86 | 0.02 | 15 | 44.3 | 7.35E-53 |
| IPI00304692 | Glycoprotein p43                                           | P38159   | 1.14 | 0.96 | 0.99 | 1.03 | 0.10 | 23 | 48.1 | 1.1E-223 |
| IPI00304740 | Intersectin-1                                              | Q15811-1 | 1.26 |      |      | 1.26 |      | 2  | 2.4  | 0.000315 |
| IPI00304742 | Lymphocyte-oriented kinase                                 | O94804   | 1.14 | 1.26 | 0.96 | 1.12 | 0.15 | 9  | 10.5 | 2.97E-52 |
| IPI00304840 | Collagen alpha-2(VI) chain                                 | P12110-1 | 1.37 | 1.02 | 1.14 | 1.18 | 0.18 | 9  | 10.1 | 3.42E-82 |

|             |                                                                |          |      |      |      |      |      |    |      |          |
|-------------|----------------------------------------------------------------|----------|------|------|------|------|------|----|------|----------|
| IPI00304875 | HIRA-interacting protein 3                                     | Q9BW71-1 | 1.45 |      |      | 1.45 |      | 2  | 5.8  | 1.12E-21 |
| IPI00304925 | Heat shock 70 kDa protein 1/2                                  | P08107   | 1.12 | 0.98 | 0.99 | 1.03 | 0.07 | 40 | 60.5 | 0        |
| IPI00304932 | Cerebral protein 1                                             | O43159   | 1.14 | 0.97 | 0.88 | 0.99 | 0.13 | 3  | 10.7 | 3.5E-255 |
| IPI00304935 | Protein SAAL1                                                  | Q96ER3   | 0.83 | 0.92 | 1.08 | 0.94 | 0.13 | 4  | 10.5 | 6.36E-97 |
| IPI00304962 | Alpha-2 type I collagen                                        | P08123   | 1.50 | 1.23 | 1.45 | 1.39 | 0.14 | 34 | 34.9 | 0        |
| IPI00305010 | Calcineurin-like phosphoesterase domain-containing protein 1   | Q9BRF8-1 | 0.84 | 1.09 | 0.87 | 0.93 | 0.14 | 10 | 40.4 | 0        |
| IPI00305064 | CD44 antigen                                                   | P16070-1 | 1.31 | 1.03 | 1.02 | 1.12 | 0.16 | 9  | 12.3 | 5.9E-146 |
| IPI00305068 | Pre-mRNA-processing factor 6                                   | O94906   | 0.94 | 1.16 | 1.08 | 1.06 | 0.11 | 17 | 21.6 | 9.2E-103 |
| IPI00305092 | Partner of Y14 and mago                                        | Q9BRP8-1 | 1.68 | 1.13 | 1.03 | 1.28 | 0.35 | 10 | 67.6 | 0        |
| IPI00305166 | Flavoprotein subunit of complex II                             | P31040   | 0.90 |      | 0.92 | 0.91 | 0.02 | 8  | 20.5 | 8.7E-243 |
| IPI00305212 | COMM domain-containing protein 9                               | Q9P000   | 1.01 | 1.24 | 1.15 | 1.13 | 0.12 | 5  | 36.9 | 4.36E-94 |
| IPI00305267 | Golgi complex-associated protein of 170 kDa                    | Q08378-1 | 1.16 | 0.91 | 1.09 | 1.05 | 0.13 | 6  | 5.8  | 1.81E-29 |
| IPI00305289 | Kinesin-like protein 1                                         | P52732   | 0.91 | 1.29 | 1.23 | 1.14 | 0.20 | 21 | 24.8 | 4.4E-167 |
| IPI00305296 | Autophagy-related protein 101                                  | Q9BSB4   |      | 0.92 |      | 0.92 |      | 2  | 12.8 | 3.26E-47 |
| IPI00305303 | Ufm1-specific protease 2                                       | Q9NUQ7   | 0.91 |      |      | 0.91 |      | 2  | 6.8  | 1.14E-11 |
| IPI00305305 | GTPase-activating protein Spa-1                                | Q96FS4   | 1.05 | 1.26 | 1.11 | 1.14 | 0.11 | 4  | 5.6  | 1.11E-35 |
| IPI00305337 | Enhancer factor C                                              | P22670   | 1.30 |      | 1.11 | 1.20 | 0.14 | 2  | 5.2  | 9.96E-07 |
| IPI00305374 | hTRESK4                                                        | Q96FV9-1 |      | 1.00 |      | 1.00 |      | 2  | 3.5  | 0.000868 |
| IPI00305383 | Complex III subunit 2                                          | P22695   | 1.04 | 0.96 | 0.94 | 0.98 | 0.05 | 17 | 45.9 | 2E-286   |
| IPI00305384 | Diadenosine 5,5-P1,P6-hexaphosphate hydrolase 3-beta           | Q96G61   | 0.85 |      | 0.92 | 0.88 | 0.05 | 6  | 34.8 | 3.86E-26 |
| IPI00305423 | Charged multivesicular body protein 6                          | Q96FZ7   | 1.15 | 1.05 | 0.89 | 1.03 | 0.13 | 4  | 22.9 | 2.7E-47  |
| IPI00305438 | Vacuolar protein sorting-associated protein 16 homolog         | Q9H269-1 |      | 1.20 | 0.92 | 1.06 | 0.19 | 4  | 6.2  | 5.53E-11 |
| IPI00305545 | Lariat debranching enzyme                                      | Q9UK59-1 | 0.74 | 1.08 | 1.14 | 0.99 | 0.21 | 4  | 8.8  | 2.51E-26 |
| IPI00305551 | Guanine nucleotide-binding protein G( $\gamma$ ) subunit alpha | P29992   | 1.11 | 1.26 | 1.17 | 1.18 | 0.08 | 14 | 41.8 | 2.7E-120 |
| IPI00305552 | cDNA FLJ39671 fis, clone SMINT2008917                          | B7WNR3   | 0.95 |      |      | 0.95 |      | 2  | 20.9 | 1.39E-44 |
| IPI00305822 | Proline-rich protein 11                                        | Q96HE9   |      |      | 0.95 | 0.95 |      | 3  | 12.8 | 1.5E-07  |
| IPI00305827 | Fibronectin type III and SPRY domain-containing protein 1      | Q9BTV5   |      | 1.10 | 1.05 | 1.07 | 0.04 | 4  | 11.5 | 2.3E-205 |

|             |                                                                                                                              |          |      |      |      |      |      |    |      |          |
|-------------|------------------------------------------------------------------------------------------------------------------------------|----------|------|------|------|------|------|----|------|----------|
| IPI00305833 | Smu-1 suppressor of mec-8 and unc-52 protein homolog                                                                         | Q2TAY7   | 0.96 | 1.18 | 1.21 | 1.12 | 0.14 | 11 | 21.2 | 3.54E-68 |
| IPI00305887 | Cell division cycle-associated protein 1                                                                                     | Q9BZD4   | 1.10 | 1.30 | 1.30 | 1.23 | 0.12 | 6  | 18.8 | 3.51E-49 |
| IPI00305978 | AFB1 aldehyde reductase 1                                                                                                    | O43488   | 1.04 | 1.27 | 1.23 | 1.18 | 0.12 | 8  | 22   | 9E-179   |
| IPI00305986 | Mediator complex subunit 18                                                                                                  | Q9BUE0   | 1.21 | 1.02 | 1.19 | 1.14 | 0.10 | 1  | 4.7  | 0.0008   |
| IPI00305992 | RCC1-like G exchanging factor-like protein                                                                                   | Q96I51   | 0.80 | 1.35 | 1.41 | 1.19 | 0.33 | 3  | 11.4 | 4.69E-10 |
| IPI00306043 | CLL-associated antigen KW-14                                                                                                 | Q9Y5A9-1 | 0.84 | 1.12 | 0.97 | 0.98 | 0.14 | 10 | 22.5 | 6.2E-116 |
| IPI00306046 | Developmentally-regulated endothelial cell locus 1 protein                                                                   | O43854-1 |      | 0.97 | 1.98 | 1.47 | 0.71 | 3  | 9.4  | 3.34E-24 |
| IPI00306048 | ATPase family AAA domain-containing protein 3B                                                                               | Q5T9A4-1 |      | 0.79 |      | 0.79 |      | 15 | 25.5 | 4.35E-84 |
| IPI00306049 | Protein misato homolog 1                                                                                                     | Q9BUK6-1 |      | 0.76 | 0.93 | 0.84 | 0.12 | 4  | 12.1 | 1.83E-16 |
| IPI00306087 | Telomerase Cajal body protein 1                                                                                              | Q9BUR4   | 1.16 | 1.00 | 1.11 | 1.09 | 0.08 | 3  | 10.2 | 4.4E-141 |
| IPI00306127 | THUMP domain-containing protein 3                                                                                            | Q9BV44   | 0.92 | 1.11 | 1.16 | 1.06 | 0.13 | 6  | 16   | 1.24E-53 |
| IPI00306159 | Nuclear receptor-binding factor 1                                                                                            | Q9BV79   | 1.05 |      |      | 1.05 |      | 1  | 3.8  | 0.004238 |
| IPI00306195 | 40 kDa proline-rich AKT substrate                                                                                            | Q96B36-2 | 0.89 | 0.92 | 0.80 | 0.87 | 0.06 | 3  | 12.7 | 2.17E-05 |
| IPI00306290 | Exportin(trNA)                                                                                                               | O43592   | 1.03 | 1.07 | 1.01 | 1.04 | 0.03 | 10 | 14.1 | 5.7E-151 |
| IPI00306301 | cDNA FLJ59461, highly similar to Pyruvate dehydrogenase E1 component alpha subunit, somatic form, mitochondrial (EC 1.2.4.1) | A5YVE9   | 1.00 |      | 1.02 | 1.01 | 0.01 | 15 | 32.7 | 4.1E-47  |
| IPI00306322 | Canstatin                                                                                                                    | P08572   |      |      | 0.86 | 0.86 |      | 2  | 1.3  | 0.000776 |
| IPI00306353 | Dual specificity protein phosphatase 23                                                                                      | Q9BVJ7   | 1.22 | 0.98 | 0.79 | 0.99 | 0.21 | 4  | 31.3 | 6.4E-12  |
| IPI00306369 | NOL1/NOP2/Sun domain family member 2                                                                                         | Q08J23   | 0.80 | 0.99 | 0.91 | 0.90 | 0.09 | 12 | 21.8 | 3.1E-153 |
| IPI00306380 | E2-induced gene 3 protein                                                                                                    | Q9BVP2-1 | 0.78 | 0.95 | 0.93 | 0.89 | 0.09 | 15 | 33.5 | 4.4E-179 |
| IPI00306382 | Secretory carrier-associated membrane protein 3                                                                              | O14828-1 | 0.81 | 1.00 | 1.06 | 0.96 | 0.13 | 6  | 30.8 | 4.5E-128 |
| IPI00306400 | Kinesin-like protein 2                                                                                                       | Q9BW19   | 1.13 | 1.71 | 1.59 | 1.48 | 0.31 | 11 | 25.3 | 1.5E-220 |
| IPI00306406 | RIO kinase 2                                                                                                                 | Q9BVS4   |      | 1.07 |      | 1.07 |      | 2  | 6    | 2.43E-14 |
| IPI00306439 | TIM21-like protein, mitochondrial                                                                                            | Q9BVV7   | 0.82 | 0.82 | 0.83 | 0.82 | 0.01 | 5  | 23   | 4.23E-14 |
| IPI00306516 | Mitochondrial import inner membrane translocase subunit TIM44                                                                | O43615   | 0.88 | 0.85 | 0.75 | 0.83 | 0.07 | 14 | 32.7 | 7.21E-81 |
| IPI00306518 | Fanconi anemia group I protein                                                                                               | Q9NVI1-3 | 0.94 |      | 0.60 | 0.77 | 0.24 | 4  | 3.4  | 2.79E-30 |
| IPI00306531 | Cytoplasmic protein NCK2                                                                                                     | O43639   | 1.23 |      |      | 1.23 |      | 2  | 5.8  | 6.74E-07 |
| IPI00306604 | CD49 antigen-like family member E                                                                                            | P08648   | 1.25 | 0.98 | 1.19 | 1.14 | 0.14 | 14 | 17.8 | 3E-216   |

|             |                                                |          |      |      |      |      |      |    |      |          |
|-------------|------------------------------------------------|----------|------|------|------|------|------|----|------|----------|
| IPI00306642 | DDB1- and CUL4-associated factor 13            | Q9NV06-1 | 0.61 | 1.05 | 0.95 | 0.87 | 0.23 | 7  | 13.7 | 2.1E-106 |
| IPI00306661 | E3 ubiquitin-protein ligase KCMF1              | Q9P0J7   |      |      | 0.89 | 0.89 |      | 3  | 9.7  | 3.8E-29  |
| IPI00306667 | 2,3-cyclic-nucleotide 3-phosphodiesterase      | P09543-1 | 1.15 | 1.40 | 1.26 | 1.27 | 0.12 | 15 | 40.1 | 1.3E-202 |
| IPI00306708 | Cancer/testis antigen 84                       | Q96KB5   | 0.86 | 1.16 | 1.03 | 1.02 | 0.15 | 8  | 28.2 | 1.5E-119 |
| IPI00306719 | cDNA FLJ55809                                  | B4DN31   | 0.28 | 1.46 | 1.24 | 1.00 | 0.63 | 4  | 10.8 | 2.63E-44 |
| IPI00306723 | CCAAT/enhancer-binding protein zeta            | Q03701   | 0.98 | 0.79 | 1.02 | 0.93 | 0.12 | 6  | 6.9  | 2.44E-28 |
| IPI00306749 | Human lung cancer oncogene 3 protein           | Q9BWU0   | 1.07 | 1.04 | 1.17 | 1.10 | 0.07 | 6  | 12.8 | 1.2E-28  |
| IPI00306933 | Myosin-IXb                                     | Q13459-2 | 0.96 | 1.16 | 1.12 | 1.08 | 0.10 | 6  | 4.4  | 1.49E-32 |
| IPI00306960 | Asparagine--tRNA ligase                        | O43776   | 0.87 | 0.97 | 0.94 | 0.93 | 0.05 | 19 | 37.6 | 0        |
| IPI00307092 | Lysine--tRNA ligase                            | Q15046-2 | 0.80 | 0.97 | 1.07 | 0.95 | 0.13 | 17 | 24.5 | 2.4E-68  |
| IPI00307155 | p164 ROCK-2                                    | O75116   | 0.85 | 1.17 | 0.59 | 0.87 | 0.29 | 6  | 7.1  | 1.01E-29 |
| IPI00307162 | Metavinculin                                   | P18206-1 | 0.93 | 0.98 | 1.07 | 1.00 | 0.07 | 66 | 61.2 | 0        |
| IPI00307200 | Switch-associated protein 70                   | Q9UH65   |      | 1.00 |      | 1.00 |      | 10 | 20.9 | 4.43E-37 |
| IPI00307257 | TBC1 domain family member 9B                   | Q66K14-1 |      | 1.69 | 1.15 | 1.42 | 0.38 | 4  | 4.8  | 4.9E-104 |
| IPI00307259 | DnaJ homolog subfamily C member 13             | O75165   | 1.11 | 1.29 | 1.06 | 1.15 | 0.12 | 12 | 7.5  | 7.5E-221 |
| IPI00307359 | Oxysterol-binding protein                      | B1AKJ7   | 0.77 | 1.16 |      | 0.97 | 0.27 | 3  | 4.6  | 9.33E-09 |
| IPI00307409 | 39S ribosomal protein L9, mitochondrial        | Q9BYD2   | 0.90 | 0.80 | 0.81 | 0.84 | 0.06 | 8  | 32.2 | 1.8E-187 |
| IPI00307545 | Tensin-1                                       | Q9HBL0   | 0.53 | 1.12 | 1.02 | 0.89 | 0.31 | 8  | 7.3  | 3.04E-16 |
| IPI00307572 | Transmembrane protein 165                      | Q9HC07   | 1.07 | 0.54 | 0.94 | 0.85 | 0.28 | 2  | 8.6  | 5.26E-29 |
| IPI00307749 | Complex I-20kD                                 | O75251   | 0.85 | 1.10 | 1.09 | 1.01 | 0.14 | 5  | 18.8 | 7.04E-78 |
| IPI00328113 | Fibrillin-1                                    | P35555   | 1.02 |      | 1.14 | 1.08 | 0.08 | 7  | 3.8  | 2.11E-12 |
| IPI00328118 | Astrin                                         | Q96R06   | 0.52 | 0.84 | 0.90 | 0.75 | 0.20 | 10 | 13.2 | 8.96E-90 |
| IPI00328154 | NEDD8-activating enzyme E1 catalytic subunit   | Q8TBC4   | 1.25 | 1.05 | 1.12 | 1.14 | 0.10 | 12 | 39.3 | 1.1E-152 |
| IPI00328161 | 38 kDa FK506-binding protein                   | Q14318-2 | 0.96 |      |      | 0.96 |      | 6  | 16.3 | 2.7E-114 |
| IPI00328170 | Mannosyl-oligosaccharide glucosidase           | Q13724   | 1.29 | 1.02 | 1.07 | 1.13 | 0.14 | 14 | 21.6 | 3.6E-156 |
| IPI00328200 | Glutamine-rich protein 1                       | Q2TAL8   | 0.92 | 1.21 | 1.06 | 1.06 | 0.15 | 5  | 7.6  | 7.52E-72 |
| IPI00328243 | Choline phosphatase 3                          | Q8IV08   | 1.51 | 1.64 | 1.80 | 1.65 | 0.14 | 6  | 18   | 6.83E-73 |
| IPI00328293 | Ser/Arg-related nuclear matrix protein         | Q8IYB3-2 | 1.16 | 0.90 | 1.07 | 1.04 | 0.14 | 4  | 8    | 6.69E-31 |
| IPI00328306 | Zinc finger CCCH domain-containing protein 11A | O75152   | 0.96 | 1.26 | 1.16 | 1.13 | 0.15 | 10 | 16.5 | 1.34E-75 |
| IPI00328318 | 4-alpha-glucanotransferase                     | P35573-1 |      | 1.07 | 1.24 | 1.16 | 0.12 | 4  | 3.8  | 3.75E-31 |

|             |                                                                                                          |          |      |      |      |      |      |    |      |          |
|-------------|----------------------------------------------------------------------------------------------------------|----------|------|------|------|------|------|----|------|----------|
| IPI00328319 | Chromatin assembly factor 1 subunit C                                                                    | Q09028   | 1.27 | 1.09 | 0.96 | 1.11 | 0.15 | 12 | 33.4 | 1.81E-94 |
| IPI00328350 | Cell growth-inhibiting gene 39 protein                                                                   | Q9BZQ8   | 1.27 | 1.66 | 1.27 | 1.40 | 0.23 | 6  | 10.8 | 3.91E-94 |
| IPI00328361 | Serine--tRNA ligase                                                                                      | Q9NP81   | 1.00 | 0.77 | 0.93 | 0.90 | 0.12 | 7  | 20.8 | 3.1E-115 |
| IPI00328415 | Diaphorase-1                                                                                             | P00387-1 | 0.94 | 1.27 | 1.29 | 1.16 | 0.20 | 13 | 38.9 | 1E-152   |
| IPI00328571 | Protein FAM39DP                                                                                          | C4AMC7   |      |      | 1.10 | 1.10 |      | 5  | 16.1 | 6.11E-57 |
| IPI00328658 | ASH2-like protein                                                                                        | Q9UBL3-1 | 0.94 | 1.13 | 1.34 | 1.14 | 0.20 | 2  | 5.4  | 6.7E-159 |
| IPI00328715 | 3D3/LYRIC                                                                                                | Q86UE4   | 1.27 | 1.14 | 1.06 | 1.16 | 0.10 | 13 | 31.4 | 2.6E-200 |
| IPI00328737 | Zinc finger protein 598                                                                                  | Q86UK7-1 | 0.80 | 0.96 | 0.82 | 0.86 | 0.09 | 5  | 9.8  | 2E-198   |
| IPI00328748 | cDNA FLJ77177, highly similar to Homo sapiens arginine-rich, mutated in early stage tumors (ARMET), mRNA | A8K878   | 1.01 | 1.02 | 1.03 | 1.02 | 0.01 | 20 | 43.6 | 0        |
| IPI00328753 | CG-1 antigen                                                                                             | Q86UP2-1 | 1.16 | 1.04 | 1.14 | 1.11 | 0.07 | 39 | 33.6 | 0        |
| IPI00328815 | Deubiquitinating enzyme 48                                                                               | Q86UV5-1 | 1.14 | 0.89 | 1.06 | 1.03 | 0.13 | 6  | 9.6  | 3.5E-198 |
| IPI00328838 | Menin                                                                                                    | O00255-1 | 1.04 | 1.19 | 1.23 | 1.15 | 0.10 | 3  | 11.1 | 1.1E-61  |
| IPI00328840 | Ally of AML-1 and LEF-1                                                                                  | Q86V81   | 1.25 | 0.94 | 1.02 | 1.07 | 0.16 | 8  | 42.4 | 3.9E-290 |
| IPI00328847 | N-acetyltransferase 11                                                                                   | Q86UY6-1 | 0.91 | 1.17 | 1.07 | 1.05 | 0.13 | 2  | 12.2 | 2.18E-18 |
| IPI00328867 | pp60c-src                                                                                                | P12931-2 | 1.01 |      |      | 1.01 |      | 6  | 13.3 | 1.72E-41 |
| IPI00328905 | Ras GTPase-activating-like protein IQGAP3                                                                | Q86VI3   | 1.12 | 1.43 | 1.43 | 1.33 | 0.18 | 10 | 9    | 9.1E-119 |
| IPI00328913 | Vacuolar protein sorting 28 homolog (S. cerevisiae)                                                      | Q86VK0   | 0.89 |      | 1.00 | 0.94 | 0.08 | 7  | 31.8 | 1.2E-101 |
| IPI00328985 | Functional spliceosome-associated protein 35                                                             | Q86W42-1 | 1.08 | 1.05 | 1.13 | 1.08 | 0.04 | 8  | 31.7 | 3.51E-62 |
| IPI00328987 | Bystin                                                                                                   | Q13895   | 0.69 | 0.88 | 0.81 | 0.79 | 0.09 | 13 | 36.4 | 1.97E-85 |
| IPI00329025 | Protein jagunal homolog 1                                                                                | Q8N5M9   | 1.05 | 0.79 | 1.12 | 0.99 | 0.18 | 2  | 13.1 | 1.95E-31 |
| IPI00329036 | 39S ribosomal protein L50, mitochondrial                                                                 | Q8N5N7   | 0.96 | 0.84 | 0.81 | 0.87 | 0.08 | 5  | 39.2 | 9.2E-142 |
| IPI00329088 | Amplified in liver cancer protein 1                                                                      | Q86WJ1-1 | 1.02 | 1.03 | 0.99 | 1.01 | 0.02 | 4  | 4.8  | 4.51E-08 |
| IPI00329108 | Sciellin                                                                                                 | O95171-1 |      |      | 0.85 | 0.85 |      | 2  | 3.9  | 0.014457 |
| IPI00329142 | Glutamate-rich protein 1                                                                                 | Q86X53   |      |      | 1.15 | 1.15 |      | 1  | 3.8  | 1.59E-76 |
| IPI00329236 | nPKC-delta                                                                                               | Q05655   |      | 1.07 | 1.21 | 1.14 | 0.10 | 3  | 6.1  | 3.17E-34 |
| IPI00329275 | Serine/threonine-protein kinase VRK2                                                                     | Q86Y07-1 |      | 1.10 |      | 1.10 |      | 2  | 6.3  | 5.45E-14 |
| IPI00329321 | LYR motif-containing protein 7                                                                           | Q5U5X0   | 1.07 |      | 0.89 | 0.98 | 0.13 | 4  | 41.3 | 1.18E-29 |
| IPI00329331 | UDP-glucose pyrophosphorylase                                                                            | Q16851-1 | 1.07 |      | 1.20 | 1.13 | 0.10 | 15 | 29.9 | 4.3E-198 |

|             |                                                                                                                               |          |      |      |      |      |      |    |      |          |
|-------------|-------------------------------------------------------------------------------------------------------------------------------|----------|------|------|------|------|------|----|------|----------|
| IPI00329385 | Myotubularin-related protein 6                                                                                                | Q9Y217-1 |      |      | 1.18 | 1.18 |      | 3  | 6    | 1.29E-18 |
| IPI00329441 | Ras-related protein Rab-41                                                                                                    | Q86YS6   | 0.81 | 1.12 |      | 0.96 | 0.22 | 5  | 22.6 | 1.48E-28 |
| IPI00329512 | Sm protein B/B                                                                                                                | P14678-3 | 1.00 | 0.92 | 0.95 | 0.96 | 0.04 | 11 | 24.2 | 3.94E-86 |
| IPI00329526 | Cell division cycle protein 20 homolog                                                                                        | Q12834   |      | 0.76 | 0.73 | 0.75 | 0.02 | 5  | 19.2 | 5.29E-24 |
| IPI00329536 | Early endosome antigen 1                                                                                                      | Q15075   | 1.25 | 0.91 | 1.05 | 1.07 | 0.17 | 16 | 16.3 | 6.1E-152 |
| IPI00329572 | Endophilin I                                                                                                                  | Q9UKS6   | 1.26 | 1.21 | 0.88 | 1.12 | 0.21 | 6  | 18.9 | 4.5E-220 |
| IPI00329573 | Collagen alpha-1(XII) chain                                                                                                   | Q99715-1 | 1.85 | 1.03 | 1.20 | 1.36 | 0.43 | 59 | 26.5 | 0        |
| IPI00329583 | ATPase family protein 2 homolog                                                                                               | Q8NB90-1 |      | 0.96 |      | 0.96 |      | 4  | 5.5  | 3.11E-10 |
| IPI00329591 | Required for meiotic nuclear division protein 1 homolog                                                                       | Q9NWS8-1 |      |      | 1.09 | 1.09 |      | 2  | 4.2  | 4.35E-06 |
| IPI00329594 | Coiled-coil domain-containing protein 59                                                                                      | Q9P031   | 1.12 | 0.93 |      | 1.03 | 0.13 | 2  | 8.7  | 1.05E-16 |
| IPI00329598 | 17-beta-hydroxysteroid dehydrogenase 11                                                                                       | Q8NBQ5   | 1.66 | 1.46 |      | 1.56 | 0.14 | 2  | 11   | 5.5E-141 |
| IPI00329600 | Probable saccharopine dehydrogenase                                                                                           | Q8NBX0   | 0.96 | 1.30 | 1.16 | 1.14 | 0.17 | 4  | 11   | 3.5E-36  |
| IPI00329605 | Divergent upstream protein                                                                                                    | P20585   | 1.14 | 1.08 |      | 1.11 | 0.05 | 6  | 6.4  | 4.22E-10 |
| IPI00329625 | cDNA FLJ56153, highly similar to Homo sapiens transforming growth factor beta regulator 4 (TBRG4), transcript variant 1, mRNA | B4DU42   |      | 0.61 | 0.67 | 0.64 | 0.04 | 2  | 3.4  | 0.000437 |
| IPI00329629 | DnaJ homolog subfamily C member 7                                                                                             | Q99615   | 0.79 | 1.07 | 0.93 | 0.93 | 0.14 | 24 | 41.3 | 6.9E-277 |
| IPI00329633 | Threonine--tRNA ligase                                                                                                        | P26639   | 0.85 | 0.92 | 0.95 | 0.91 | 0.05 | 25 | 40.1 | 0        |
| IPI00329650 | 35 kDa nucleoporin                                                                                                            | Q8NFH5   | 0.95 | 1.08 | 0.90 | 0.98 | 0.09 | 5  | 24.2 | 1.57E-83 |
| IPI00329664 | E3 ubiquitin-protein ligase SMURF2                                                                                            | Q9HAU4   | 0.73 | 0.87 |      | 0.80 | 0.10 | 4  | 5.9  | 1.28E-10 |
| IPI00329672 | Myosin-Ic                                                                                                                     | Q12965   | 0.80 | 1.16 | 1.01 | 0.99 | 0.18 | 8  | 9.2  | 4.1E-112 |
| IPI00329679 | Protein zwilch homolog                                                                                                        | Q9H900-1 |      | 1.08 |      | 1.08 |      | 2  | 4.6  | 8.08E-17 |
| IPI00329685 | Arylsulfatase A                                                                                                               | B7XD04   |      | 1.13 | 1.41 | 1.27 | 0.20 | 2  | 6.1  | 2.57E-58 |
| IPI00329692 | Glycylpeptide N-tetradecanoyltransferase 1                                                                                    | P30419-1 | 1.10 | 1.07 | 1.10 | 1.09 | 0.02 | 12 | 27.8 | 0        |
| IPI00329696 | Protein FAM82B                                                                                                                | Q96DB5   | 0.91 | 1.02 | 1.02 | 0.98 | 0.06 | 15 | 47.8 | 1.7E-139 |
| IPI00329742 | Fumarylacetoacetate hydrolase domain-containing protein 2A                                                                    | Q96GK7   | 1.11 | 1.12 | 0.96 | 1.06 | 0.09 | 4  | 17.2 | 3.19E-63 |
| IPI00329753 | Protein FAM164A                                                                                                               | Q96GY0   | 0.92 |      | 1.43 | 1.17 | 0.36 | 5  | 14.5 | 9.82E-06 |
| IPI00329784 | Brain ryanodine receptor-calcium release channel                                                                              | Q15413-1 | 1.52 |      |      | 1.52 |      | 3  | 0.7  | 0.020652 |
| IPI00329801 | Anchorin CII                                                                                                                  | P08758   | 1.17 | 1.11 | 1.16 | 1.15 | 0.04 | 30 | 78.4 | 0        |
| IPI00332106 | Hematopoietic PBX-interacting protein                                                                                         | Q96AQ6-1 | 1.95 | 1.87 | 1.46 | 1.76 | 0.26 | 11 | 18.1 | 6.66E-36 |

|             |                                                         |          |      |      |      |      |      |     |      |          |
|-------------|---------------------------------------------------------|----------|------|------|------|------|------|-----|------|----------|
| IPI00332157 | 39S ribosomal protein L54, mitochondrial                | Q6P161   |      |      | 0.93 | 0.93 |      | 1   | 7.2  | 6.93E-05 |
| IPI00332371 | 6-phosphofructokinase, liver type                       | P17858-1 | 1.12 |      | 1.11 | 1.12 | 0.01 | 20  | 30.5 | 0        |
| IPI00332428 | NNP78                                                   | Q9BXY0   | 1.01 | 0.96 | 0.66 | 0.88 | 0.19 | 2   | 12.3 | 1.2E-61  |
| IPI00332493 | Pleckstrin homology domain-containing family O member 2 | Q8TD55-1 | 3.13 |      | 1.16 | 2.14 | 1.39 | 2   | 6.1  | 4.41E-90 |
| IPI00332499 | Nuclear autoantigenic sperm protein                     | P49321-3 | 1.39 | 0.93 |      | 1.16 | 0.32 | 20  | 43   | 1.2E-263 |
| IPI00333010 | Calcium homeostasis endoplasmic reticulum protein       | Q8IWX8   | 1.00 | 1.08 | 0.90 | 0.99 | 0.09 | 8   | 10.6 | 4.38E-75 |
| IPI00333014 | Spindle and kinetochore-associated protein 3            | Q8IX90-1 |      | 0.85 |      | 0.85 |      | 2   | 9.2  | 1.24E-10 |
| IPI00333067 | HECT domain and RCC1-like domain-containing protein 4   | Q5GLZ8-1 |      |      | 0.97 | 0.97 |      | 3   | 4.2  | 5.32E-11 |
| IPI00333068 | Actin-related protein 2/3 complex subunit 1A            | Q92747   | 0.94 | 1.12 | 1.12 | 1.06 | 0.11 | 12  | 39.7 | 2.7E-163 |
| IPI00333133 | Putative uncharacterized protein RAB6C                  | Q53S08   | 0.92 | 0.91 |      | 0.92 | 0.01 | 4   | 16.1 | 9.1E-157 |
| IPI00333215 | Transcription elongation factor A protein 1             | P23193-1 | 1.05 | 1.15 | 1.10 | 1.10 | 0.05 | 16  | 43.9 | 0        |
| IPI00333541 | Actin-binding protein 280                               | P21333-1 | 0.95 | 0.87 | 0.94 | 0.92 | 0.05 | 162 | 71.6 | 0        |
| IPI00333568 | CAAT box DNA-binding protein subunit A                  | P23511-1 |      | 0.77 |      | 0.77 |      | 1   | 5.5  | 1.32E-08 |
| IPI00333753 | Inositol 1,4,5-trisphosphate receptor type 1            | Q14643-1 |      |      | 1.33 | 1.33 |      | 3   | 0.8  | 0.009157 |
| IPI00333763 | Glutaredoxin-related protein 5, mitochondrial           | Q86SX6   | 1.11 | 1.14 | 0.98 | 1.07 | 0.08 | 3   | 28   | 2E-148   |
| IPI00333770 | Dedicator of cytokinesis protein 10                     | Q96BY6-1 | 0.89 | 1.21 | 1.24 | 1.11 | 0.19 | 2   | 1.3  | 2.08E-17 |
| IPI00333771 | Caldesmon                                               | Q05682-5 |      | 0.84 | 0.86 | 0.85 | 0.01 | 48  | 60.2 | 0        |
| IPI00333913 | Neuroblastoma-amplified gene protein                    | A2RRP1-1 |      | 0.48 |      | 0.48 |      | 2   | 0.8  | 0.003813 |
| IPI00334126 | Ral GEF with PH domain and SH3-binding motif 2          | Q86X27-1 |      | 1.09 | 1.06 | 1.08 | 0.02 | 3   | 6.9  | 6.24E-61 |
| IPI00334159 | HIBBJ46                                                 | P61758   | 1.03 | 0.92 | 0.87 | 0.94 | 0.08 | 8   | 27.9 | 1.6E-139 |
| IPI00334190 | EPB72-like protein 2                                    | Q9UJZ1   | 1.12 | 0.86 | 0.94 | 0.97 | 0.13 | 19  | 59   | 0        |
| IPI00334282 | Protein FAM3C                                           | Q92520   | 0.83 | 0.96 | 0.96 | 0.91 | 0.08 | 6   | 29.1 | 7.32E-54 |
| IPI00334514 | C-alpha-formylglycine-generating enzyme 2               | Q8NBJ7-3 |      |      | 1.17 | 1.17 |      | 3   | 10.9 | 1.97E-18 |
| IPI00334713 | APOBEC1-binding protein 1                               | Q99729-3 | 1.02 | 0.89 | 0.95 | 0.95 | 0.06 | 13  | 45.3 | 1.4E-258 |
| IPI00334715 | Glucocorticoid receptor DNA-binding factor 1            | Q9NRY4-1 | 1.02 | 0.90 | 1.03 | 0.98 | 0.07 | 4   | 4.1  | 1.32E-21 |
| IPI00334914 | TRM1-like protein                                       | Q7Z2T5-1 | 0.77 |      | 0.80 | 0.79 | 0.02 | 2   | 9.5  | 1.82E-47 |
| IPI00335001 | Huntingtin yeast partner K                              | Q9NX55-1 | 1.04 | 0.86 | 0.85 | 0.92 | 0.11 | 7   | 29.7 | 1.57E-62 |
| IPI00335051 | Toll-like receptor 8                                    | Q495P6   |      |      | 0.74 | 0.74 |      | 1   | 0.9  | 0.002683 |

|             |                                                                                    |          |      |      |      |      |      |    |      |          |
|-------------|------------------------------------------------------------------------------------|----------|------|------|------|------|------|----|------|----------|
| IPI00335280 | Ribulose-5-phosphate-3-epimerase                                                   | Q96AT9-1 | 0.87 | 1.04 | 0.97 | 0.96 | 0.09 | 3  | 15.4 | 9.9E-123 |
| IPI00335385 | DCS-1                                                                              | Q96C86   | 1.07 | 1.31 | 0.77 | 1.05 | 0.27 | 4  | 17.2 | 2.19E-37 |
| IPI00335437 | Ankyrin repeat and zinc finger domain-containing protein 1                         | Q9H8Y5   |      | 0.89 | 1.11 | 1.00 | 0.15 | 2  | 3.7  | 2.57E-05 |
| IPI00335449 | PP2A subunit A isoform PR65-beta                                                   | P30154-2 | 0.91 | 1.17 | 1.00 | 1.02 | 0.13 | 15 | 28.3 | 0        |
| IPI00335589 | RNA methyltransferase-like protein 1                                               | Q9HC36   |      |      | 1.35 | 1.35 |      | 3  | 8.1  | 7.03E-09 |
| IPI00336034 | Epimorphin                                                                         | P32856-1 |      | 1.15 |      | 1.15 |      | 1  | 4.6  | 1.44E-71 |
| IPI00337386 | Fas ligand-associated factor 1                                                     | O75400-2 | 0.99 | 0.90 | 0.94 | 0.95 | 0.04 | 15 | 19   | 2.7E-144 |
| IPI00337397 | 96 kDa nucleoporin                                                                 | P52948-5 | 0.92 | 1.04 | 0.99 | 0.98 | 0.06 | 18 | 14.1 | 3.82E-82 |
| IPI00337460 | cDNA FLJ55519, highly similar to Kinesin light chain 1                             | B4DS14   | 0.82 |      | 1.06 | 0.94 | 0.17 | 17 | 24   | 5.9E-113 |
| IPI00337494 | Calcium-binding mitochondrial carrier protein SCaMC-1                              | Q6NUK1-1 | 1.07 | 0.96 | 1.03 | 1.02 | 0.05 | 12 | 27.7 | 5.37E-78 |
| IPI00337495 | Lysyl hydroxylase 2                                                                | O00469-2 | 1.19 | 0.88 | 0.95 | 1.01 | 0.16 | 28 | 41.4 | 0        |
| IPI00337648 | Fas-associated protein-tyrosine phosphatase 1                                      | Q12923-4 | 1.37 |      |      | 1.37 |      | 2  | 0.8  | 0.021837 |
| IPI00337667 | Protein bicaudal D homolog 2                                                       | Q8TD16-2 | 0.65 | 1.01 | 0.84 | 0.84 | 0.18 | 5  | 8.8  | 6.08E-95 |
| IPI00337772 | Hyaluronan mediated motility receptor                                              | O75330-3 |      | 1.00 |      | 1.00 |      | 2  | 4    | 7.04E-07 |
| IPI00339381 | DNA-binding protein/plasminogen activator inhibitor 1 regulator                    | Q14527-1 |      | 1.46 | 0.97 | 1.22 | 0.35 | 5  | 7.3  | 4.41E-43 |
| IPI00339384 | Androgen-regulated short-chain dehydrogenase/reductase 1                           | Q8TC12-1 | 0.88 | 1.30 | 1.29 | 1.16 | 0.24 | 8  | 28.6 | 1.7E-126 |
| IPI00373869 | HCG32827, isoform CRA_d                                                            | C9J4G0   | 1.62 | 1.30 | 1.12 | 1.35 | 0.25 | 8  | 53.6 | 9.62E-38 |
| IPI00373877 | Zinc finger protein 326                                                            | Q5BKZ1-1 | 0.95 | 0.97 | 0.89 | 0.94 | 0.04 | 9  | 16   | 2.2E-47  |
| IPI00374272 | UPF0600 protein C5orf51                                                            | A6NDU8   | 1.62 |      | 1.01 | 1.31 | 0.44 | 3  | 22.1 | 4.74E-76 |
| IPI00374657 | 33 kDa VAMP-associated protein                                                     | A6NDZ0   | 1.07 |      | 1.00 | 1.04 | 0.05 | 10 | 31   | 2.13E-78 |
| IPI00374747 | Origin recognition complex subunit 3                                               | Q9UBD5-2 |      | 1.16 | 1.06 | 1.11 | 0.07 | 6  | 10.5 | 5.5E-138 |
| IPI00375015 | Deoxyuridine 5-triphosphate nucleotidohydrolase, mitochondrial                     | P33316-2 | 1.14 |      | 1.11 | 1.13 | 0.02 | 14 | 81.7 | 5.7E-195 |
| IPI00375127 | Eukaryotic translation initiation factor 4H                                        | Q15056-2 |      | 1.27 | 0.93 | 1.10 | 0.24 | 11 | 36.4 | 9.5E-224 |
| IPI00375142 | Ubiquitin carrier protein D3                                                       | P61077-3 | 0.81 |      |      | 0.81 |      | 1  | 7.4  | 0.012393 |
| IPI00375144 | Arsenite-resistance protein 2                                                      | Q9BXP5-1 | 0.95 | 1.08 | 1.04 | 1.02 | 0.06 | 28 | 34.2 | 1E-246   |
| IPI00375358 | Activator 1 140 kDa subunit                                                        | P35251-1 | 1.06 | 1.21 | 1.24 | 1.17 | 0.10 | 11 | 12.5 | 0        |
| IPI00375380 | cDNA FLJ37456 fis, clone BRAWH2011096, highly similar to 26S proteasome non-ATPase | B3KT15   |      | 1.08 |      | 1.08 |      | 22 | 54.2 | 0        |



|             |                                                                                       |          |      |      |      |      |      |    |      |          |
|-------------|---------------------------------------------------------------------------------------|----------|------|------|------|------|------|----|------|----------|
|             | regulatory subunit 13                                                                 |          |      |      |      |      |      |    |      |          |
| IPI00375462 | Serine/arginine-rich-splicing regulatory protein 86                                   | Q8WXA9-2 | 1.65 | 1.53 |      | 1.59 | 0.08 | 3  | 7.4  | 4.63E-17 |
| IPI00375527 | Inosine-5-monophosphate dehydrogenase                                                 | A4D0Z6   |      | 0.91 |      | 0.91 |      | 4  | 9    | 1.48E-39 |
| IPI00375531 | Granzyme A-activated DNase                                                            | P15531-2 | 0.87 | 0.98 | 0.91 | 0.92 | 0.06 | 11 | 49.7 | 4E-162   |
| IPI00375600 | Beta-1,3-glucosyltransferase                                                          | Q6Y288   |      |      | 1.10 | 1.10 |      | 2  | 5.2  | 0.000782 |
| IPI00375631 | Interferon-induced 15 kDa protein                                                     | P05161   | 0.99 | 1.11 |      | 1.05 | 0.09 | 2  | 13.3 | 1.21E-06 |
| IPI00375676 | Ferritin light chain                                                                  | P02792   | 1.34 | 0.97 | 1.07 | 1.12 | 0.19 | 6  | 42.9 | 1.87E-70 |
| IPI00375677 | 39S ribosomal protein L21, mitochondrial                                              | Q7Z2W9   | 0.85 | 0.94 | 0.71 | 0.83 | 0.12 | 3  | 24.4 | 9.67E-36 |
| IPI00375731 | G patch domain-containing protein 9                                                   | P98175-1 | 1.01 | 1.04 | 0.96 | 1.00 | 0.04 | 12 | 15.5 | 5.14E-51 |
| IPI00375824 | Diphthamide biosynthesis methyltransferase                                            | Q9H2P9-5 | 0.72 |      | 0.93 | 0.83 | 0.14 | 3  | 15.8 | 2.78E-15 |
| IPI00375836 | Cancer-associated nucleoprotein                                                       | Q6SJ93-1 |      | 1.06 |      | 1.06 |      | 2  | 4.6  | 1.03E-06 |
| IPI00376005 | eIF-4D                                                                                | P63241-2 | 0.84 | 0.98 | 0.92 | 0.91 | 0.07 | 15 | 62.5 | 3.3E-232 |
| IPI00376035 | cDNA FLJ55847                                                                         | B4DJ79   |      | 1.18 | 0.89 | 1.04 | 0.21 | 1  | 12.9 | 1.77E-43 |
| IPI00376119 | cAMP-dependent protein kinase catalytic subunit beta                                  | P22694-2 |      |      | 1.30 | 1.30 |      | 10 | 21.4 | 5.6E-122 |
| IPI00376195 | HESB-like domain-containing protein 1                                                 | Q86U28   | 0.87 | 1.26 |      | 1.06 | 0.28 | 3  | 20.1 | 2.77E-07 |
| IPI00376199 | Interferon regulatory factor 2-binding protein 2                                      | Q7Z5L9-1 | 1.22 |      | 0.85 | 1.04 | 0.26 | 4  | 16.7 | 1.1E-125 |
| IPI00376317 | Autoantigen Ge-1                                                                      | Q6P2E9-1 | 1.41 | 1.21 | 1.12 | 1.24 | 0.15 | 8  | 9.2  | 5.09E-88 |
| IPI00376344 | MYH-1c                                                                                | O43795-1 | 0.98 | 1.00 | 0.98 | 0.99 | 0.01 | 31 | 34.3 | 0        |
| IPI00376394 | Neuroblastoma-derived sulfhydryl oxidase                                              | Q6ZRP7   |      | 0.95 | 1.03 | 0.99 | 0.06 | 3  | 6.6  | 2.97E-19 |
| IPI00376798 | 60S ribosomal protein L11                                                             | P62913-1 | 0.80 | 0.99 | 0.93 | 0.91 | 0.10 | 9  | 38.8 | 2.47E-83 |
| IPI00376976 | 130 kDa phosphatidylinositol 4,5-biphosphate-dependent ARF1 GTPase-activating protein | Q9ULH1-2 |      |      | 1.08 | 1.08 |      | 3  | 4    | 1.77E-17 |
| IPI00377050 | 13S Golgi transport complex 90 kDa subunit                                            | Q9UP83-2 | 0.87 |      | 0.23 | 0.55 | 0.45 | 4  | 5.3  | 3.35E-12 |
| IPI00377261 | Far upstream element-binding protein 3                                                | Q96I24-1 | 1.02 | 1.10 | 1.03 | 1.05 | 0.04 | 21 | 50.2 | 0        |
| IPI00382412 | Branched-chain-amino-acid aminotransferase, cytosolic                                 | P54687   |      | 0.89 | 0.98 | 0.94 | 0.07 | 7  | 21.6 | 2.01E-80 |
| IPI00382452 | Charged multivesicular body protein 1a                                                | Q9HD42-1 | 1.04 | 1.05 |      | 1.05 | 0.00 | 3  | 13.3 | 0.000165 |
| IPI00382470 | Heat shock 86 kDa                                                                     | P07900-2 | 1.00 | 0.98 | 0.96 | 0.98 | 0.02 | 71 | 55.7 | 0        |
| IPI00382683 | Lymphocyte/NHL galectin-8 short isoform                                               | Q96QS7   |      | 1.17 |      | 1.17 |      | 3  | 14.7 | 2.76E-42 |
| IPI00382843 | Major prion protein                                                                   | O75942   | 0.98 | 0.97 | 0.98 | 0.98 | 0.01 | 3  | 11.2 | 4.55E-39 |

|             |                                                               |          |      |      |      |      |      |    |      |          |
|-------------|---------------------------------------------------------------|----------|------|------|------|------|------|----|------|----------|
| IPI00382926 | Decay-accelerating factor splicing variant 5                  | Q14UF2   |      |      | 1.23 | 1.23 |      | 3  | 9.1  | 0.004031 |
| IPI00382958 | MTAP protein                                                  | Q8WV80   |      |      | 1.15 | 1.15 |      | 6  | 31.8 | 2.3E-99  |
| IPI00382985 | Aicardi-Goutieres syndrome 3 protein                          | Q8TDP1-1 | 1.01 |      | 1.04 | 1.03 | 0.02 | 4  | 30.5 | 3.55E-89 |
| IPI00382990 | DERP12 (Dermal papilla derived protein 12)                    | Q8TE01   | 2.60 | 0.80 | 0.75 | 1.38 | 1.05 | 14 | 44.3 | 5.3E-279 |
| IPI00383163 | Thymocyte nuclear protein 1                                   | Q9P016-1 | 1.06 | 1.42 |      | 1.24 | 0.26 | 3  | 15.1 | 1.7E-07  |
| IPI00383439 | Centrosomal protein of 97 kDa                                 | Q8IW35-1 | 0.83 | 1.39 |      | 1.11 | 0.39 | 5  | 8.2  | 8.31E-16 |
| IPI00383444 | T-complex protein 11-like protein 1                           | Q9NUJ3   |      | 1.22 | 1.16 | 1.19 | 0.04 | 2  | 5.3  | 2.8E-192 |
| IPI00383581 | Alpha-glucosidase 2                                           | Q14697-1 | 1.21 | 1.06 | 1.15 | 1.14 | 0.08 | 47 | 51.6 | 0        |
| IPI00383751 | Calregulin                                                    | Q9UDG2   | 1.30 | 0.97 | 1.02 | 1.10 | 0.18 | 5  | 19.6 | 1.3E-132 |
| IPI00383849 | Phospholipase C, gamma 1                                      | A2A284   | 0.93 | 1.10 | 1.05 | 1.02 | 0.09 | 20 | 21.3 | 2.1E-144 |
| IPI00384028 | Poly(A) polymerase alpha                                      | P51003-1 | 1.10 | 1.23 | 1.24 | 1.19 | 0.08 | 6  | 11.2 | 9.66E-33 |
| IPI00384176 | BRG1-associated factor 180                                    | Q86U86-1 | 0.98 | 1.14 | 1.15 | 1.09 | 0.10 | 5  | 3.5  | 2.67E-19 |
| IPI00384180 | Dopamine receptor-interacting protein 3                       | Q86U90   | 0.59 | 0.74 | 0.64 | 0.66 | 0.08 | 8  | 36.9 | 6.36E-43 |
| IPI00384265 | Constitutive coactivator of PPAR-gamma-like protein 1         | Q9NZB2-6 | 0.99 | 1.09 | 1.00 | 1.03 | 0.06 | 20 | 22.5 | 4.2E-161 |
| IPI00384280 | Prenylcysteine lyase                                          | Q9UHG3   | 1.38 | 1.27 | 1.53 | 1.39 | 0.13 | 7  | 15.4 | 8.56E-40 |
| IPI00384428 | Biphenyl hydrolase-like protein                               | Q86WA6-1 |      |      | 1.05 | 1.05 |      | 3  | 10.3 | 0.000179 |
| IPI00384456 | DNA mismatch repair protein Msh6                              | P52701-1 | 1.02 | 1.26 | 1.14 | 1.14 | 0.12 | 25 | 21.9 | 7.1E-184 |
| IPI00384471 | Bromodomain containing 1                                      | A6ZJA4   |      | 0.73 |      | 0.73 |      | 2  | 1.9  | 0.024566 |
| IPI00384541 | Regulation of nuclear pre-mRNA domain-containing protein 2    | Q5VT52-1 | 0.99 |      | 1.07 | 1.03 | 0.06 | 6  | 6.8  | 1.13E-29 |
| IPI00384643 | p53-induced gene 3 protein                                    | Q53FA7-1 | 0.90 |      |      | 0.90 |      | 2  | 5.1  | 0.005036 |
| IPI00384689 | Pyridoxal-dependent decarboxylase domain-containing protein 1 | Q6P996-1 | 0.71 | 1.04 | 0.90 | 0.88 | 0.17 | 16 | 31.7 | 1.9E-251 |
| IPI00384746 | Copine VIII                                                   | Q86YQ8   |      | 0.85 |      | 0.85 |      | 4  | 7.3  | 3.04E-07 |
| IPI00384857 | Androgen-regulated protein 2                                  | Q9UK76-2 |      | 1.05 | 1.05 | 1.05 | 0.00 | 2  | 21.5 | 5.71E-79 |
| IPI00385042 | Chronic renal failure gene protein                            | Q9BZE4   | 0.78 | 0.84 | 0.79 | 0.80 | 0.03 | 20 | 32.5 | 1.1E-144 |
| IPI00385055 | Alpha N-catenin                                               | P26232-1 |      | 1.20 |      | 1.20 |      | 7  | 8.6  | 6.8E-116 |
| IPI00385128 | 1-acylglycerol-3-phosphate O-acyltransferase 7                | Q643R3-1 |      | 0.85 | 0.84 | 0.84 | 0.01 | 2  | 7.8  | 3.26E-34 |
| IPI00385267 | Docking protein alpha                                         | P08240   |      | 1.13 | 1.12 | 1.13 | 0.01 | 9  | 19.6 | 8.59E-54 |
| IPI00385449 | Protein kinase C alpha type                                   | P17252   | 0.92 | 1.11 | 1.09 | 1.04 | 0.10 | 8  | 13.2 | 4.8E-124 |

|             |                                                                                         |          |      |      |      |      |      |    |      |          |
|-------------|-----------------------------------------------------------------------------------------|----------|------|------|------|------|------|----|------|----------|
| IPI00385495 | Lipase maturation factor 2                                                              | Q9BU23-1 | 1.14 |      | 1.11 | 1.12 | 0.02 | 2  | 4.2  | 4.53E-27 |
| IPI00385649 | Leucine-rich repeat and calponin homology domain-containing protein 3                   | Q96I18-2 |      | 1.16 |      | 1.16 |      | 2  | 3.1  | 4.97E-07 |
| IPI00385950 | Pyridine nucleotide-disulfide oxidoreductase domain-containing protein 1                | Q8WU10   |      |      | 0.93 | 0.93 |      | 2  | 6.2  | 2.1E-64  |
| IPI00385978 | Centrobin                                                                               | Q8N137-2 | 0.96 | 1.15 | 1.01 | 1.04 | 0.10 | 1  | 1.1  | 0.010656 |
| IPI00386119 | Mammalian branch point-binding protein                                                  | Q15637-5 |      | 0.99 | 0.86 | 0.92 | 0.09 | 10 | 16.6 | 6.8E-100 |
| IPI00386120 | Mammalian branch point-binding protein                                                  | Q15637-6 | 1.14 |      |      | 1.14 |      | 10 | 23.8 | 1.3E-97  |
| IPI00386122 | 2C4D                                                                                    | Q9Y3A3-1 | 0.99 | 1.16 | 0.99 | 1.05 | 0.10 | 5  | 32.9 | 1.21E-70 |
| IPI00386189 | Gastric cancer antigen Ga19                                                             | Q9BXJ9-1 | 0.89 | 0.99 | 0.88 | 0.92 | 0.06 | 34 | 38.8 | 1E-168   |
| IPI00386208 | Drug-sensitive protein 1                                                                | Q9NZ23   | 2.44 | 0.72 | 0.72 | 1.29 | 0.99 | 11 | 75.7 | 2.3E-120 |
| IPI00386271 | Calcium-binding mitochondrial carrier protein Aralar1                                   | O75746   | 1.08 | 0.85 | 0.87 | 0.93 | 0.13 | 7  | 12.7 | 3.81E-65 |
| IPI00386311 | HepA-related protein                                                                    | Q9NZC9   |      | 1.07 |      | 1.07 |      | 2  | 2.8  | 0.003728 |
| IPI00386444 | Enaptin                                                                                 | Q8NF91-1 | 0.98 | 1.04 | 1.06 | 1.03 | 0.04 | 9  | 1.4  | 3.39E-58 |
| IPI00386516 | cDNA FLJ32696 fis, clone TESTI2000358                                                   | A8KAH5   | 2.72 | 1.70 | 1.06 | 1.83 | 0.84 | 2  | 5    | 0.000134 |
| IPI00386562 | Filamin-binding LIM protein 1                                                           | Q8WUP2-2 | 0.74 | 1.07 | 0.92 | 0.91 | 0.16 | 4  | 16.3 | 1.78E-48 |
| IPI00386591 | Probable proline racemase                                                               | Q96EM0   | 0.89 |      | 0.81 | 0.85 | 0.06 | 2  | 7.3  | 0.000113 |
| IPI00386755 | Endoplasmic oxidoreductin-1-like protein                                                | Q96HE7   | 1.39 | 1.12 | 1.20 | 1.24 | 0.14 | 19 | 57.9 | 0        |
| IPI00387130 | Anamorsin                                                                               | Q6FI81-1 | 0.92 | 0.98 | 0.97 | 0.96 | 0.03 | 7  | 20.2 | 2.79E-35 |
| IPI00394668 | 136 kDa double-stranded RNA-binding protein                                             | P55265-4 | 1.04 | 1.27 | 1.12 | 1.14 | 0.12 | 18 | 18.2 | 3E-280   |
| IPI00394679 | Negative elongation factor A                                                            | Q9H3P2-7 | 1.23 | 1.34 | 1.23 | 1.27 | 0.06 | 6  | 25.6 | 1.63E-42 |
| IPI00394758 | Aldehyde dehydrogenase 10                                                               | P51648-2 | 0.95 |      | 1.02 | 0.98 | 0.04 | 3  | 8.3  | 1.7E-33  |
| IPI00394767 | Carbonate dehydratase XIII                                                              | Q8N1Q1   |      | 0.95 |      | 0.95 |      | 1  | 6.5  | 2.86E-56 |
| IPI00394788 | Alanine--tRNA ligase                                                                    | Q5JTZ9   | 0.81 | 1.13 | 0.89 | 0.95 | 0.17 | 6  | 8.2  | 1.29E-35 |
| IPI00394805 | Protein ALAESM                                                                          | Q6ZSJ8   |      | 1.10 | 0.86 | 0.98 | 0.17 | 3  | 39.1 | 9.54E-15 |
| IPI00394837 | Ras-related C3 botulinum toxin substrate 1 (Rho family, small GTP binding protein Rac1) | A4D2P2   | 0.92 |      |      | 0.92 |      | 11 | 66.9 | 2.1E-134 |
| IPI00394838 | cDNA FLJ56442, highly similar to ATP-citrate synthase (EC 2.3.3.8)                      | B4DIM0   | 1.14 |      |      | 1.14 |      | 37 | 37.2 | 0        |
| IPI00394926 | DNA polymerase delta subunit 3                                                          | Q15054   |      | 1.03 | 0.95 | 0.99 | 0.05 | 4  | 11.6 | 6.02E-37 |
| IPI00395002 | Homer protein homolog 3                                                                 | Q9NSC5-1 | 1.14 | 1.27 | 0.98 | 1.13 | 0.14 | 2  | 5.5  | 3.7E-07  |

|             |                                                                 |          |      |      |      |      |      |    |      |          |
|-------------|-----------------------------------------------------------------|----------|------|------|------|------|------|----|------|----------|
| IPI00395337 | Factor interacting with PAP                                     | Q6UN15-1 | 1.34 | 0.91 | 1.01 | 1.09 | 0.22 | 8  | 22.6 | 2.2E-208 |
| IPI00395357 | MBNL protein                                                    | Q96P92   | 0.81 | 1.05 | 1.06 | 0.97 | 0.14 | 7  | 22.3 | 1.4E-29  |
| IPI00395372 | Coiled-coil-helix-coiled-coil-helix domain-containing protein 5 | Q9BSY4   |      |      | 0.88 | 0.88 |      | 3  | 52.7 | 4E-64    |
| IPI00395463 | Charged multivesicular body protein 7                           | Q8WUX9   |      |      | 0.88 | 0.88 |      | 4  | 12.4 | 2.3E-12  |
| IPI00395488 | Protein slit-like 2                                             | Q6EMK4   | 1.15 | 1.90 | 1.20 | 1.42 | 0.42 | 7  | 15.2 | 4.6E-129 |
| IPI00395596 | Amino-terminal enhancer of split                                | Q14CJ1   |      | 2.03 |      | 2.03 |      | 2  | 8    | 0.000111 |
| IPI00395605 | 115 kDa guanine nucleotide exchange factor                      | Q92888-3 | 1.07 | 1.14 | 1.08 | 1.09 | 0.04 | 17 | 22.4 | 1.36E-98 |
| IPI00395627 | Calcyclin-binding protein                                       | Q9HB71-1 | 0.90 | 1.00 | 1.01 | 0.97 | 0.06 | 23 | 73.7 | 0        |
| IPI00395694 | Importin-12                                                     | Q9Y5L0-2 | 1.01 | 1.01 | 1.08 | 1.03 | 0.04 | 7  | 10.4 | 2.4E-100 |
| IPI00395768 | Syntaxin-3                                                      | Q13277-1 | 1.44 | 1.41 |      | 1.43 | 0.02 | 3  | 10.7 | 1.44E-07 |
| IPI00395865 | Histone acetyltransferase type B subunit 2                      | Q16576   | 1.12 |      | 1.21 | 1.17 | 0.06 | 14 | 40.7 | 2.6E-175 |
| IPI00395887 | Thioredoxin domain-containing protein 1                         | Q9H3N1   | 0.98 | 1.07 | 1.04 | 1.03 | 0.05 | 8  | 31.1 | 3.82E-63 |
| IPI00395903 | Transmembrane protein 106B                                      | Q9NUM4   | 1.09 |      |      | 1.09 |      | 1  | 4.7  | 1.62E-66 |
| IPI00395939 | Phosphatidylinositol transfer protein beta isoform              | P48739-2 | 0.94 | 1.01 | 0.99 | 0.98 | 0.04 | 14 | 50.2 | 1.9E-175 |
| IPI00395977 | Smoothelin                                                      | P53814-3 |      | 1.07 |      | 1.07 |      | 14 | 19.1 | 2.58E-80 |
| IPI00396015 | ACC-alpha                                                       | Q13085-4 | 1.22 | 0.93 | 0.92 | 1.03 | 0.17 | 8  | 4.4  | 2.5E-158 |
| IPI00396048 | UPF0636 protein C4orf41                                         | Q7Z392-1 |      | 1.09 | 0.93 | 1.01 | 0.11 | 5  | 7.4  | 5.52E-27 |
| IPI00396126 | UPF0461 protein C5orf24                                         | Q7Z618-1 | 1.26 | 1.36 | 1.30 | 1.31 | 0.05 | 3  | 24.5 | 1.2E-99  |
| IPI00396131 | cDNA FLJ56221, highly similar to YTH domain protein 3           | B4DPX9   | 0.91 | 1.14 | 1.13 | 1.06 | 0.13 | 10 | 18.7 | 3.4E-124 |
| IPI00396171 | Microtubule-associated protein 4                                | P27816-1 | 1.38 | 0.98 | 1.04 | 1.13 | 0.21 | 40 | 43.8 | 1.3E-290 |
| IPI00396174 | Coiled-coil domain-containing protein 25                        | Q86WR0   | 0.96 | 1.23 |      | 1.09 | 0.20 | 3  | 14.4 | 8.34E-05 |
| IPI00396185 | Embryonic growth-associated protein homolog                     | Q5VZE5   |      | 1.16 |      | 1.16 |      | 2  | 2.8  | 0.001899 |
| IPI00396203 | Beta-tubulin cofactor D                                         | Q9BTW9-1 | 0.86 | 0.97 | 0.97 | 0.93 | 0.06 | 12 | 13.1 | 1.2E-127 |
| IPI00396218 | Coated vesicle-associated kinase of 104 kDa                     | Q6P3W7   | 0.98 | 1.27 | 1.22 | 1.16 | 0.15 | 3  | 5.4  | 3.18E-10 |
| IPI00396279 | CLIP-associating protein 1                                      | Q7Z460-1 | 0.83 | 1.22 | 1.16 | 1.07 | 0.21 | 11 | 10.3 | 2.7E-146 |
| IPI00396321 | Leucine-rich repeat-containing protein 59                       | Q96AG4   | 0.94 | 0.92 | 0.91 | 0.92 | 0.02 | 15 | 55.4 | 0        |
| IPI00396329 | Brix domain-containing protein 1                                | Q9H7B2   | 0.73 | 0.72 | 0.75 | 0.73 | 0.02 | 6  | 21.6 | 1.8E-61  |
| IPI00396378 | Heterogeneous nuclear ribonucleoproteins A2/B1                  | P22626-1 | 1.15 | 1.04 | 1.15 | 1.11 | 0.06 | 27 | 62.6 | 0        |

|             |                                                               |          |      |      |      |      |      |     |      |          |
|-------------|---------------------------------------------------------------|----------|------|------|------|------|------|-----|------|----------|
| IPI00396387 | GTP-binding protein HSR1                                      | P36915-1 | 1.40 | 1.11 | 1.22 | 1.25 | 0.15 | 7   | 11.2 | 2.05E-66 |
| IPI00396406 | Probable E3 ubiquitin-protein ligase makorin-2                | Q9H000   | 0.79 |      |      | 0.79 |      | 3   | 9.4  | 5.36E-07 |
| IPI00396411 | Cleft lip and palate transmembrane protein 1                  | O96005-1 | 1.29 | 0.73 | 1.19 | 1.07 | 0.30 | 5   | 12   | 3.25E-28 |
| IPI00396435 | ATP-dependent RNA helicase #46                                | O43143   | 0.88 | 1.02 | 0.97 | 0.96 | 0.07 | 29  | 39.6 | 8.1E-200 |
| IPI00396437 | Cervical mucin-associated protein                             | Q9UJU6-2 | 1.06 |      | 1.08 | 1.07 | 0.01 | 10  | 33.9 | 0        |
| IPI00396485 | Elongation factor 1-alpha 1                                   | P68104   | 0.76 | 0.82 | 0.82 | 0.80 | 0.04 | 34  | 70.8 | 0        |
| IPI00396527 | Coiled-coil domain-containing protein 128                     | Q6ZMI0-1 |      | 1.10 | 1.31 | 1.20 | 0.15 | 3   | 5    | 1.84E-18 |
| IPI00396563 | SAPK substrate protein 1                                      | Q04323-2 | 1.16 | 1.06 | 0.92 | 1.05 | 0.12 | 10  | 37.8 | 6.93E-73 |
| IPI00396593 | PDZ and LIM domain protein 2                                  | Q96JY6-1 | 0.89 | 1.03 | 0.92 | 0.95 | 0.08 | 5   | 15.3 | 1.8E-134 |
| IPI00396627 | ElaC homolog protein 2                                        | Q9BQ52-1 | 0.82 | 0.76 | 0.86 | 0.81 | 0.05 | 12  | 22.9 | 7.2E-217 |
| IPI00396630 | cAMP-dependent protein kinase catalytic subunit alpha         | P17612-1 | 1.19 | 1.23 | 1.23 | 1.22 | 0.03 | 14  | 44.4 | 2.3E-181 |
| IPI00396656 | APOBEC-related cytidine deaminase                             | Q9HC16-1 |      | 1.04 |      | 1.04 |      | 1   | 3.1  | 0.011275 |
| IPI00396967 | Four and a half LIM-domain protein 2                          | Q2I5I4   | 0.43 | 0.63 | 0.61 | 0.55 | 0.11 | 25  | 57.1 | 0        |
| IPI00397366 | hSGT2                                                         | Q86W92-1 | 0.91 |      | 0.98 | 0.95 | 0.05 | 6   | 7    | 1.03E-27 |
| IPI00397383 | Kinesin-like protein KIF1B                                    | O60333-4 |      | 0.93 | 0.74 | 0.84 | 0.13 | 2   | 1.6  | 3.03E-13 |
| IPI00397571 | NSFL1 cofactor p47                                            | Q9UNZ2-5 | 1.36 | 1.07 | 1.09 | 1.17 | 0.16 | 20  | 54.6 | 0        |
| IPI00397715 | Testis development protein NYD-SP11                           | Q6ZQQ6-2 |      | 0.83 |      | 0.83 |      | 2   | 0.5  | 0.021878 |
| IPI00397721 | Biogenesis of lysosome-related organelles complex 1 subunit 3 | Q6QNY0   | 1.27 |      | 0.85 | 1.06 | 0.30 | 2   | 17.3 | 2.7E-76  |
| IPI00397860 | Cytochrome b5                                                 | P00167-1 | 1.29 |      | 1.13 | 1.21 | 0.12 | 4   | 42.5 | 7.1E-103 |
| IPI00397883 | Uncharacterized protein FLJ45252                              | Q6ZSR9   | 1.05 | 1.28 | 0.89 | 1.07 | 0.19 | 5   | 21.1 | 5.5E-108 |
| IPI00397904 | 93 kDa nucleoporin                                            | Q8N1F7   | 0.89 | 1.10 | 1.01 | 1.00 | 0.11 | 25  | 37.1 | 5.3E-210 |
| IPI00397947 | CROC-1                                                        | Q13404-1 | 1.09 | 1.01 | 1.04 | 1.05 | 0.04 | 9   | 23   | 3.8E-103 |
| IPI00398009 | Importin-4                                                    | Q8TEX9-2 | 0.79 | 0.76 | 0.72 | 0.75 | 0.03 | 25  | 30.1 | 0        |
| IPI00398625 | Hornerin                                                      | Q86YZ3   | 5.55 | 0.10 | 0.10 | 1.92 | 3.15 | 7   | 8.8  | 1.6E-140 |
| IPI00398708 | Kinesin light chain 1                                         | Q07866-9 |      | 1.08 |      | 1.08 |      | 9   | 15.2 | 2.21E-74 |
| IPI00398779 | Hemidesmosomal protein 1                                      | Q15149-4 | 1.11 | 1.22 | 1.27 | 1.20 | 0.08 | 213 | 52.1 | 0        |
| IPI00398828 | Endophilin-B2                                                 | Q9NR46-2 | 1.11 | 1.31 |      | 1.21 | 0.14 | 6   | 17.6 | 3.69E-24 |
| IPI00398845 | MAGE tumor antigen CCF                                        | Q9Y5V3-2 |      |      | 0.99 | 0.99 |      | 3   | 6    | 1.51E-72 |
| IPI00398922 | Phospholipase C-beta-3 neighbouring gene                      | Q96C90   | 1.50 |      | 1.01 | 1.25 | 0.35 | 3   | 30.2 | 2.2E-108 |

|             |                                                                      |          |      |      |      |      |      |    |      |          |
|-------------|----------------------------------------------------------------------|----------|------|------|------|------|------|----|------|----------|
|             | protein                                                              |          |      |      |      |      |      |    |      |          |
| IPI00399053 | NADH dehydrogenase [ubiquinone] 1 alpha subcomplex assembly factor 3 | Q9BU61   | 0.71 | 0.87 | 0.85 | 0.81 | 0.09 | 4  | 25.5 | 7.38E-23 |
| IPI00399089 | LDLR chaperone MESD                                                  | Q14696   | 1.08 | 1.06 | 1.10 | 1.08 | 0.02 | 10 | 40.2 | 7.53E-91 |
| IPI00399254 | HIV-1-induced protein HIN-1                                          | Q01804-1 |      | 0.89 |      | 0.89 |      | 1  | 1.4  | 5.18E-17 |
| IPI00399265 | Tumor protein D52-like 2                                             | Q5JWU6   | 1.10 | 0.90 | 0.89 | 0.96 | 0.12 | 14 | 62.4 | 0        |
| IPI00399266 | Tumor protein D52-like 2                                             | O43399-3 |      | 0.94 |      | 0.94 |      | 12 | 60.8 | 9.5E-300 |
| IPI00399307 | Prolylcarboxypeptidase (Angiotensinase C), isoform CRA_b             | A8MU24   | 1.10 | 1.12 | 1.19 | 1.14 | 0.05 | 7  | 15.7 | 1.57E-69 |
| IPI00400765 | UPF0493 protein KIAA1632                                             | Q9HCE0-1 | 1.13 | 0.67 |      | 0.90 | 0.32 | 2  | 1.2  | 5.75E-06 |
| IPI00400826 | Aging-associated gene 4 protein                                      | P10909-2 |      | 1.28 |      | 1.28 |      | 2  | 7    | 3.64E-10 |
| IPI00400922 | NF-kappa-B-binding protein                                           | Q14690   | 0.88 | 1.14 | 0.98 | 1.00 | 0.13 | 10 | 7.2  | 6.53E-74 |
| IPI00401002 | OrlYt TD-element-binding protein 7                                   | Q8NDX6   | 1.27 | 1.66 |      | 1.46 | 0.28 | 2  | 14   | 0.000379 |
| IPI00401264 | Endoplasmic reticulum resident protein 44                            | Q9BS26   | 1.04 | 1.05 | 1.05 | 1.05 | 0.01 | 10 | 34.5 | 3.6E-187 |
| IPI00401285 | DNL-type zinc finger protein                                         | Q5SXM8   | 0.84 | 0.88 | 1.13 | 0.95 | 0.16 | 3  | 36   | 1.11E-41 |
| IPI00401829 | Uncharacterized protein C14orf38                                     | P0C221   | 2.16 |      | 1.00 | 1.58 | 0.82 | 3  | 4.2  | 0.000884 |
| IPI00401962 | Coiled-coil domain-containing protein 137                            | Q6PK04   | 0.91 | 0.88 |      | 0.90 | 0.02 | 5  | 20.1 | 7.58E-12 |
| IPI00402008 | SAPS domain family member 1                                          | Q9UPN7   | 1.07 | 1.19 | 0.92 | 1.06 | 0.14 | 5  | 14   | 1.7E-107 |
| IPI00402055 | Cobalamin synthase W domain-containing protein 3                     | Q5JTY5   | 0.91 |      |      | 0.91 |      | 1  | 3.5  | 1.58E-20 |
| IPI00402231 | Cysteine string protein                                              | Q9H3Z4-1 | 1.35 | 1.51 |      | 1.43 | 0.12 | 3  | 33.3 | 4.04E-20 |
| IPI00402657 | RNA polymerase II-associated protein 1                               | Q9BWH6-1 | 1.93 |      |      | 1.93 |      | 2  | 2.5  | 1.64E-07 |
| IPI00409561 | COMM domain-containing protein 6                                     | Q7Z4G1-2 |      |      | 1.11 | 1.11 |      | 2  | 24.5 | 6.08E-80 |
| IPI00409607 | Calmodulin-regulated spectrin-associated protein 1-like protein 1    | Q08AD1-1 | 1.06 |      |      | 1.06 |      | 2  | 1.7  | 1.17E-08 |
| IPI00409635 | Chr2Syt                                                              | A0FGR8-2 |      | 1.29 | 1.18 | 1.24 | 0.08 | 4  | 5.5  | 2.89E-13 |
| IPI00409659 | Chap1                                                                | Q9UHD9   | 1.36 | 1.08 | 1.07 | 1.17 | 0.17 | 7  | 19.7 | 2.3E-261 |
| IPI00409671 | ATP-dependent RNA helicase DDX42                                     | Q86XP3-1 | 0.93 | 1.06 | 0.97 | 0.99 | 0.07 | 19 | 33.2 | 4.2E-180 |
| IPI00409675 | MORF-related gene 15 protein                                         | Q9UBU8-1 | 0.97 | 1.08 | 1.28 | 1.11 | 0.16 | 2  | 5    | 6.16E-17 |
| IPI00409684 | Membrane-associated protein HEM-2                                    | Q9Y2A7-2 | 0.99 | 1.11 | 1.17 | 1.09 | 0.09 | 16 | 17.4 | 9.1E-138 |
| IPI00409717 | ATP-dependent RNA helicase eIF4A-2                                   | Q14240-2 | 1.12 | 1.43 | 1.47 | 1.34 | 0.19 | 17 | 40.7 | 1.2E-290 |
| IPI00409761 | CHETK-alpha                                                          | P35790-1 |      |      | 0.16 | 0.16 |      | 1  | 8.8  | 0.005863 |

|             |                                                             |          |      |      |      |      |      |    |      |          |
|-------------|-------------------------------------------------------------|----------|------|------|------|------|------|----|------|----------|
| IPI00410034 | Amino acid transporter A2                                   | Q96QD8-1 |      | 0.99 | 1.17 | 1.08 | 0.13 | 1  | 4.2  | 2.06E-14 |
| IPI00410067 | Zinc finger antiviral protein                               | Q7Z2W4-1 | 0.87 |      |      | 0.87 |      | 11 | 18   | 6.8E-218 |
| IPI00410069 | Zinc finger antiviral protein                               | Q7Z2W4-3 |      | 1.01 | 1.04 | 1.03 | 0.02 | 6  | 8.3  | 1.1E-199 |
| IPI00410079 | Cerebral protein 10                                         | Q96TC7-1 |      |      | 0.83 | 0.83 |      | 1  | 3.6  | 0.000398 |
| IPI00410091 | Uncharacterized protein C11orf73                            | Q53FT3   | 0.97 |      | 1.18 | 1.07 | 0.15 | 2  | 11.2 | 1.08E-26 |
| IPI00410118 | Protein quaking                                             | Q96PU8-4 | 1.20 | 1.06 | 0.99 | 1.08 | 0.11 | 6  | 23.1 | 1.55E-46 |
| IPI00410162 | Putative uncharacterized protein TCEB2                      | B7WPD3   | 1.06 | 1.24 |      | 1.15 | 0.13 | 11 | 49.1 | 3.41E-70 |
| IPI00410214 | 3(2),5-bisphosphate nucleotidase 1                          | O95861-1 |      | 1.13 | 1.06 | 1.09 | 0.05 | 10 | 41.9 | 7.7E-132 |
| IPI00410215 | 3(2),5-bisphosphate nucleotidase 1                          | O95861-2 | 1.06 |      |      | 1.06 |      | 3  | 15.7 | 1.3E-40  |
| IPI00410287 | 5-AMP-activated protein kinase catalytic subunit alpha-1    | Q13131-2 | 0.96 | 1.27 | 1.09 | 1.11 | 0.15 | 5  | 11.5 | 3.63E-55 |
| IPI00410297 | Endo-glucuronidase                                          | Q9Y251   |      |      | 2.45 | 2.45 |      | 2  | 3.3  | 0.004472 |
| IPI00410485 | Cutaneous T-cell lymphoma-associated antigen HD-CL-09       | Q9H2K8   | 1.09 |      | 1.01 | 1.05 | 0.06 | 3  | 5.3  | 1.08E-09 |
| IPI00410487 | Twisted gastrulation protein homolog 1                      | Q9GZX9-1 | 1.30 | 0.99 | 1.11 | 1.13 | 0.15 | 3  | 19.7 | 1.14E-14 |
| IPI00410590 | Protein FAM61A                                              | Q8ND56-2 | 0.86 | 1.07 | 1.09 | 1.01 | 0.13 | 6  | 13.6 | 3.47E-09 |
| IPI00410618 | Uncharacterized protein KIAA1143                            | Q96AT1   | 1.31 |      | 1.10 | 1.21 | 0.15 | 7  | 45.5 | 2.52E-47 |
| IPI00410657 | mRNA (guanine-N(7)-)-methyltransferase                      | O43148-2 | 1.19 | 1.12 | 1.20 | 1.17 | 0.04 | 6  | 14.3 | 6.77E-30 |
| IPI00410666 | Protein LAP4                                                | Q14160-3 | 1.17 | 1.19 | 1.11 | 1.15 | 0.04 | 7  | 7.3  | 3.17E-86 |
| IPI00410693 | PAI1 RNA-binding protein 1                                  | Q8NC51-1 | 1.04 | 0.81 | 0.85 | 0.90 | 0.12 | 27 | 56.6 | 0        |
| IPI00410705 | I-kappa-B-interacting Ras-like protein 1                    | Q9NYS0   |      |      | 0.78 | 0.78 |      | 2  | 12.5 | 3.8E-08  |
| IPI00410717 | Pogo transposable element with ZNF domain                   | Q7Z3K3-1 |      | 1.38 | 1.38 | 1.38 | 0.00 | 3  | 4.2  | 4.4E-74  |
| IPI00411356 | Protein SKD2                                                | Q9UN37   |      |      | 1.05 | 1.05 |      | 3  | 8.9  | 5.91E-07 |
| IPI00411426 | Vacuolar protein sorting-associated protein 26A             | O75436   | 1.25 | 0.98 | 1.16 | 1.13 | 0.14 | 10 | 35.2 | 9.3E-116 |
| IPI00411559 | Chromosome-associated polypeptide C                         | Q9NTJ3-1 | 0.99 | 1.09 | 1.07 | 1.05 | 0.05 | 35 | 33.6 | 0        |
| IPI00411614 | Acidic nucleoplasmic DNA-binding protein 1                  | O75717   | 0.90 | 1.23 | 1.10 | 1.08 | 0.17 | 14 | 16   | 5.6E-259 |
| IPI00411680 | L-isoadipyl protein carboxyl methyltransferase              | P22061-1 | 1.03 | 1.04 | 1.10 | 1.05 | 0.04 | 10 | 64.8 | 0        |
| IPI00411690 | La ribonucleoprotein domain family member 1                 | Q6PKG0-3 | 1.09 |      |      | 1.09 |      | 16 | 23.8 | 2.13E-29 |
| IPI00411705 | Chronic lymphocytic leukemia deletion region gene 6 protein | Q5W111-1 |      |      | 1.11 | 1.11 |      | 2  | 11.2 | 9.96E-50 |
| IPI00411706 | Esterase D                                                  | P10768   | 0.93 | 1.12 | 1.07 | 1.04 | 0.10 | 8  | 31.9 | 1.3E-152 |

|             |                                                                                                          |          |      |      |      |      |      |    |      |          |
|-------------|----------------------------------------------------------------------------------------------------------|----------|------|------|------|------|------|----|------|----------|
| IPI00411730 | Serine/threonine-protein phosphatase 4 regulatory subunit 1                                              | Q8TF05-1 | 0.98 | 1.30 | 1.08 | 1.12 | 0.16 | 8  | 11.4 | 1.34E-55 |
| IPI00411816 | 39S ribosomal protein L2, mitochondrial                                                                  | Q5T653   | 0.90 | 0.84 | 0.84 | 0.86 | 0.03 | 6  | 26.2 | 2.4E-100 |
| IPI00411886 | NOC2-like protein                                                                                        | Q9Y3T9   | 0.94 | 0.76 | 1.02 | 0.91 | 0.13 | 3  | 4.3  | 7.65E-06 |
| IPI00411937 | Nucleolar protein 56                                                                                     | O00567   | 0.85 | 0.85 | 0.85 | 0.85 | 0.00 | 22 | 40.6 | 1.8E-258 |
| IPI00411984 | cDNA FLJ16404 fis, clone UTERU2008019, highly similar to Serine/threonine-protein kinase 3 (EC 2.7.11.1) | B3KYA7   |      | 1.16 |      | 1.16 |      | 3  | 6.9  | 1.26E-21 |
| IPI00412147 | Long-chain fatty acid transport protein 4                                                                | Q6P1M0   |      | 0.70 | 1.10 | 0.90 | 0.29 | 3  | 6.1  | 6.15E-13 |
| IPI00412224 | Bromodomain and WD repeat-containing protein 2                                                           | Q9BZH6   | 1.02 | 1.05 | 1.00 | 1.03 | 0.02 | 4  | 4.9  | 2.33E-13 |
| IPI00412243 | TLD domain-containing protein KIAA1609                                                                   | Q6P9B6   | 1.09 | 0.97 | 0.84 | 0.97 | 0.12 | 4  | 13.6 | 4.4E-13  |
| IPI00412252 | Putative uncharacterized protein RAPGEF5                                                                 | A8MQ07   |      |      | 0.77 | 0.77 |      | 2  | 2.6  | 0.019361 |
| IPI00412343 | Fragile X mental retardation 1 protein                                                                   | Q06787-1 | 1.11 |      | 1.41 | 1.26 | 0.21 | 7  | 11.6 | 2.02E-75 |
| IPI00412344 | Serine/arginine-rich protein-specific kinase 1                                                           | Q96SB4-2 | 0.94 | 0.87 | 0.85 | 0.89 | 0.05 | 10 | 17.3 | 1.19E-28 |
| IPI00412404 | ATP-dependent RNA helicase SUPV3L1, mitochondrial                                                        | Q8IYB8   |      | 0.95 |      | 0.95 |      | 2  | 3.4  | 1.57E-05 |
| IPI00412415 | ATP-dependent chromatin-remodeling protein                                                               | Q9NRL2-1 |      | 0.88 | 0.79 | 0.84 | 0.06 | 3  | 2.4  | 2.01E-15 |
| IPI00412497 | Dynein, light chain, roadblock-type 1                                                                    | B1AKR6   |      | 1.12 | 1.09 | 1.11 | 0.02 | 2  | 18.9 | 1.62E-26 |
| IPI00412499 | Rab GTPase-binding effector protein 2                                                                    | Q9H5N1-1 |      |      | 1.05 | 1.05 |      | 2  | 4.4  | 1.07E-10 |
| IPI00412539 | Coiled-coil domain-containing protein 104                                                                | Q96G28-2 |      | 1.15 | 0.69 | 0.92 | 0.33 | 3  | 12.3 | 1.95E-15 |
| IPI00412579 | 60S ribosomal protein L10a                                                                               | P62906   | 0.83 | 0.82 | 0.87 | 0.84 | 0.03 | 13 | 43.8 | 1E-142   |
| IPI00412607 | 60S ribosomal protein L35                                                                                | P42766   | 0.93 | 0.90 | 0.96 | 0.93 | 0.03 | 10 | 49.6 | 1.2E-292 |
| IPI00412672 | Protease-activated kinase 1                                                                              | Q16512-2 | 1.27 | 1.27 | 1.29 | 1.28 | 0.01 | 5  | 7.6  | 4.6E-33  |
| IPI00412771 | Adapter protein CMS                                                                                      | Q9Y5K6   | 1.10 | 1.18 | 1.18 | 1.15 | 0.05 | 7  | 13.1 | 2.33E-28 |
| IPI00412787 | ADP-ribosylation factor-like protein 5A                                                                  | Q9Y689   | 0.65 |      |      | 0.65 |      | 1  | 6.1  | 0.000708 |
| IPI00412792 | Basic transcription factor 3-like 4                                                                      | Q96K17   | 1.32 |      | 0.89 | 1.11 | 0.30 | 5  | 44.9 | 3.26E-92 |
| IPI00412987 | Glia maturation factor beta                                                                              | P60983   | 1.02 | 1.17 | 1.05 | 1.08 | 0.08 | 7  | 38.3 | 3.6E-99  |
| IPI00413006 | Putative uncharacterized protein ENSP00000368241                                                         | A6NHZ8   | 0.85 | 1.15 | 1.20 | 1.07 | 0.19 | 2  | 32.9 | 7.98E-96 |
| IPI00413100 | Pleckstrin homology-like domain family B member 1                                                        | Q86UU1-1 |      | 1.22 |      | 1.22 |      | 2  | 2.6  | 5.64E-49 |
| IPI00413108 | 37 kDa laminin receptor precursor                                                                        | P08865   | 0.89 | 0.82 | 0.82 | 0.84 | 0.04 | 13 | 57   | 0        |
| IPI00413293 | cDNA FLJ56343, highly similar to Torsin A                                                                | B4DGM9   | 1.12 | 1.06 |      | 1.09 | 0.04 | 2  | 7.1  | 1.17E-20 |



|             |                                                                         |          |      |      |      |      |      |    |      |          |
|-------------|-------------------------------------------------------------------------|----------|------|------|------|------|------|----|------|----------|
| IPI00413324 | 60S ribosomal protein L17                                               | P18621   | 0.90 | 0.93 | 0.86 | 0.90 | 0.04 | 15 | 62   | 6.4E-131 |
| IPI00413344 | Cofilin, muscle isoform                                                 | Q9Y281   | 1.01 | 1.12 | 1.24 | 1.12 | 0.12 | 15 | 67.5 | 0        |
| IPI00413451 | Cytoplasmic antiproteinase                                              | B2RBA8   | 1.08 | 1.56 | 1.25 | 1.29 | 0.24 | 10 | 34   | 8.6E-221 |
| IPI00413500 | COMM domain-containing protein 4                                        | Q9H0A8-1 | 0.95 | 1.13 | 1.15 | 1.08 | 0.11 | 5  | 38.2 | 8.29E-28 |
| IPI00413517 | Rho guanine nucleotide exchange factor 10                               | O15013-1 |      | 0.08 |      | 0.08 |      | 2  | 2.7  | 1.49E-28 |
| IPI00413578 | Mossy fiber terminal-associated vertebrate-specific presynaptic protein | Q5T0D9-1 | 0.88 | 1.27 | 1.12 | 1.09 | 0.20 | 2  | 18.8 | 4.11E-12 |
| IPI00413611 | DNA topoisomerase 1                                                     | P11387   | 1.01 | 1.07 | 0.99 | 1.02 | 0.04 | 21 | 27.8 | 9.6E-142 |
| IPI00413612 | cDNA FLJ56629                                                           | B4DZB6   |      | 0.92 |      | 0.92 |      | 2  | 2.7  | 0.001003 |
| IPI00413641 | Aldehyde reductase                                                      | P15121   | 0.97 | 1.20 | 1.19 | 1.12 | 0.13 | 11 | 32.6 | 3.89E-28 |
| IPI00413778 | FKBP1A protein                                                          | Q0VDC6   | 1.03 | 1.03 | 0.95 | 1.00 | 0.04 | 5  | 37.2 | 9.6E-137 |
| IPI00413817 | Serine incorporator 1                                                   | Q9NRX5   | 1.66 |      |      | 1.66 |      | 2  | 6.6  | 1.35E-27 |
| IPI00413853 | UPF0515 protein C19orf66                                                | Q9NUL5-1 |      | 1.03 | 1.09 | 1.06 | 0.04 | 2  | 11.3 | 8.09E-07 |
| IPI00413895 | 130 kDa cis-Golgi matrix protein                                        | Q08379-2 | 0.98 | 1.22 | 1.16 | 1.12 | 0.12 | 11 | 13.5 | 1.7E-99  |
| IPI00413961 | cDNA FLJ61553, highly similar to Focal adhesion kinase 1 (EC 2.7.10.2)  | B4E2N6   | 0.91 | 0.98 | 0.83 | 0.91 | 0.07 | 8  | 11.6 | 9.48E-55 |
| IPI00414037 | Uncharacterized protein C9orf93                                         | Q6TFL3-1 | 0.67 |      |      | 0.67 |      | 2  | 1.3  | 0.018246 |
| IPI00414093 | BSD domain-containing protein 1                                         | Q9NW68-1 | 1.02 | 1.11 | 1.16 | 1.09 | 0.07 | 2  | 8.6  | 1.58E-09 |
| IPI00414127 | Ran-binding protein 1                                                   | P43487   | 1.08 | 0.89 | 0.90 | 0.96 | 0.10 | 14 | 71.1 | 4.2E-252 |
| IPI00414168 | E3 ubiquitin-protein ligase MARCH5                                      | Q9NX47   | 0.66 | 0.85 | 1.00 | 0.83 | 0.17 | 2  | 10.4 | 2.73E-39 |
| IPI00414197 | CUL4- and DDB1-associated WDR protein 2                                 | Q9H7D7-1 | 1.31 |      |      | 1.31 |      | 2  | 4.4  | 0.00895  |
| IPI00414289 | COP9 signalosome complex subunit 1                                      | Q13098-7 | 0.92 | 1.00 | 0.95 | 0.95 | 0.04 | 16 | 32.4 | 2.1E-121 |
| IPI00414315 | Epidermal growth factor receptor kinase substrate 8-like protein 2      | Q9H6S3-1 | 1.27 | 1.32 | 1.22 | 1.27 | 0.05 | 12 | 23.4 | 2.9E-133 |
| IPI00414320 | 56 kDa autoantigen                                                      | P50995   | 1.10 |      |      | 1.10 |      | 9  | 15.9 | 2.1E-101 |
| IPI00414323 | Serine/threonine-protein phosphatase 4 regulatory subunit 3B            | Q5MIZ7-1 |      | 1.17 | 1.22 | 1.20 | 0.03 | 2  | 3.4  | 6.72E-06 |
| IPI00414384 | Hydroxysteroid dehydrogenase-like protein 2                             | Q6YN16-1 | 0.87 | 1.13 | 1.08 | 1.02 | 0.14 | 7  | 22.2 | 2.2E-171 |
| IPI00414410 | 39S ribosomal protein L22, mitochondrial                                | Q9NWU5-1 | 0.91 | 0.98 | 0.91 | 0.93 | 0.04 | 10 | 46.6 | 2.39E-74 |
| IPI00414442 | CDK5 activator-binding protein C53                                      | Q96JB5-1 | 1.11 | 1.13 | 1.21 | 1.15 | 0.05 | 9  | 15.8 | 5.05E-56 |
| IPI00414463 | Leucine carboxyl methyltransferase 1                                    | Q9UIC8-2 | 0.84 |      |      | 0.84 |      | 3  | 8.1  | 0.00059  |

|             |                                                                         |          |      |      |      |      |      |    |      |          |
|-------------|-------------------------------------------------------------------------|----------|------|------|------|------|------|----|------|----------|
| IPI00414482 | General transcription factor 3C polypeptide 1                           | Q12789-2 | 0.92 | 0.87 | 0.80 | 0.87 | 0.06 | 2  | 1.6  | 1.06E-11 |
| IPI00414554 | Actin-related protein 2/3 complex subunit 5-like protein                | Q9BPX5   | 1.14 | 0.94 | 1.03 | 1.03 | 0.10 | 7  | 63.4 | 1.12E-74 |
| IPI00414629 | Protein unc-119 homolog B                                               | A6NIH7   | 0.99 | 1.28 | 1.28 | 1.18 | 0.17 | 6  | 34.7 | 1.94E-30 |
| IPI00414657 | Chromosome transmission fidelity factor 18 homolog                      | Q8WVB6-2 |      | 1.47 | 1.31 | 1.39 | 0.11 | 7  | 11   | 1.8E-120 |
| IPI00414676 | Heat shock 84 kDa                                                       | P08238   | 0.98 | 0.92 | 0.92 | 0.94 | 0.04 | 80 | 73.5 | 0        |
| IPI00414717 | Golgi glycoprotein 1                                                    | Q92896-2 | 0.54 | 0.57 | 0.72 | 0.61 | 0.10 | 6  | 6.2  | 2.63E-94 |
| IPI00414836 | Osteoclast-stimulating factor 1                                         | Q92882   | 0.88 | 1.02 | 0.96 | 0.95 | 0.07 | 10 | 57.5 | 9.2E-222 |
| IPI00414852 |                                                                         |          | 0.85 |      |      | 0.85 |      | 5  | 39.1 | 1.89E-14 |
| IPI00414858 | Component of oligomeric Golgi complex 3                                 | Q96JB2-1 |      |      | 1.29 | 1.29 |      | 3  | 4.5  | 4.36E-49 |
| IPI00414860 | 60S ribosomal protein L37a                                              | P61513   | 0.78 |      | 1.03 | 0.91 | 0.18 | 4  | 31.5 | 2.28E-08 |
| IPI00418125 | Layilin                                                                 | Q6UX15-1 |      | 1.20 |      | 1.20 |      | 2  | 7.6  | 1.01E-20 |
| IPI00418169 | Annexin A2                                                              | P07355-2 | 0.99 | 1.07 | 1.07 | 1.04 | 0.05 | 37 | 72.3 | 0        |
| IPI00418213 | Rab5 GDP/GTP exchange factor                                            | Q9UJ41-1 | 1.03 |      | 0.94 | 0.99 | 0.06 | 3  | 3.7  | 1.11E-07 |
| IPI00418248 | cDNA FLJ56351, highly similar to Mps one binder kinase activator-like 2 | B4DKP3   |      |      | 1.07 | 1.07 |      | 2  | 7.8  | 2.35E-23 |
| IPI00418262 | Brain-type aldolase                                                     | P09972   | 1.11 | 1.16 | 1.11 | 1.13 | 0.03 | 17 | 38.6 | 0        |
| IPI00418290 | 39S ribosomal protein L14, mitochondrial                                | Q6P1L8   | 0.91 | 0.90 | 0.82 | 0.88 | 0.05 | 4  | 35.9 | 5.6E-136 |
| IPI00418313 | Double-stranded RNA-binding protein 76                                  | Q12906-4 | 1.11 | 1.11 | 1.07 | 1.10 | 0.02 | 33 | 41.4 | 0        |
| IPI00418471 | Vimentin                                                                | P08670   | 0.97 | 0.90 | 1.01 | 0.96 | 0.05 | 68 | 85.4 | 0        |
| IPI00418497 | Mitochondrial import inner membrane translocase subunit TIM50           | Q3ZCQ8-2 | 0.84 | 0.81 | 0.85 | 0.83 | 0.02 | 9  | 21.9 | 5.7E-208 |
| IPI00418603 | Ubiquitin carrier protein R2                                            | Q712K3   | 1.03 | 1.04 | 0.90 | 0.99 | 0.08 | 5  | 23.1 | 5.74E-25 |
| IPI00419084 | DENN domain-containing protein 5B                                       | Q6ZUT9-2 |      |      | 0.68 | 0.68 |      | 2  | 2    | 1.53E-09 |
| IPI00419166 | Protein FAM83G                                                          | A6ND36-1 |      | 0.75 |      | 0.75 |      | 2  | 2.6  | 2.14E-05 |
| IPI00419194 | Isoamyl acetate-hydrolyzing esterase 1 homolog                          | Q2TAA2   |      | 1.02 | 1.18 | 1.10 | 0.12 | 3  | 21.4 | 1.26E-30 |
| IPI00419235 | Glutathione S-transferase Mu 5                                          | P46439   | 1.35 |      | 1.17 | 1.26 | 0.13 | 12 | 40.2 | 2.37E-76 |
| IPI00419237 | Cytosol aminopeptidase                                                  | P28838-1 | 0.90 | 0.94 | 0.92 | 0.92 | 0.02 | 21 | 53.2 | 0        |
| IPI00419249 | Macropain subunit C8                                                    | P25788-1 | 0.96 | 1.08 | 1.14 | 1.06 | 0.09 | 17 | 56.9 | 4.9E-163 |
| IPI00419258 | High mobility group protein 1                                           | P09429   | 1.10 | 1.06 | 1.06 | 1.07 | 0.02 | 21 | 51.2 | 0        |
| IPI00419266 | Complex I-B14                                                           | P56556   | 1.17 | 1.11 | 1.21 | 1.16 | 0.05 | 2  | 15.6 | 0.000574 |

|             |                                                                                                |          |      |      |      |      |      |    |      |          |
|-------------|------------------------------------------------------------------------------------------------|----------|------|------|------|------|------|----|------|----------|
| IPI00419373 | Heterogeneous nuclear ribonucleoprotein A3                                                     | P51991-1 | 1.10 | 1.06 | 1.01 | 1.06 | 0.04 | 23 | 47.1 | 0        |
| IPI00419473 | RNA polymerase B transcription factor 3                                                        | P20290-2 | 1.33 | 0.79 | 0.74 | 0.95 | 0.32 | 15 | 68.5 | 1.5E-172 |
| IPI00419531 | Cleavage and polyadenylation specificity factor 100 kDa subunit                                | Q9P210   | 0.80 | 1.20 | 0.86 | 0.95 | 0.22 | 4  | 8.6  | 2.58E-30 |
| IPI00419535 | Leucine-rich repeat-containing protein 8E                                                      | Q6NSJ5   |      |      | 0.96 | 0.96 |      | 3  | 3.8  | 0.001855 |
| IPI00419575 | Conserved edge-expressed protein                                                               | Q7L5D6-1 |      | 1.14 |      | 1.14 |      | 3  | 10.4 | 8.75E-40 |
| IPI00419585 | Cyclophilin A                                                                                  | P62937   | 0.96 | 1.24 | 1.21 | 1.14 | 0.15 | 14 | 81.8 | 9.8E-282 |
| IPI00419626 | 39S ribosomal protein L55, mitochondrial                                                       | Q7Z7F7-2 | 1.00 | 0.97 | 0.90 | 0.96 | 0.05 | 2  | 18.9 | 1.86E-30 |
| IPI00419721 | EPM2A-interacting protein 1                                                                    | Q7L775   | 2.16 | 0.83 | 1.29 | 1.43 | 0.67 | 4  | 9.4  | 1.17E-21 |
| IPI00419802 | 3-hydroxyisobutyryl-CoA hydrolase, mitochondrial                                               | Q6NVY1-1 | 0.85 | 1.33 | 1.10 | 1.09 | 0.24 | 3  | 8.3  | 5.4E-08  |
| IPI00419844 | Inactive ubiquitin-specific peptidase 39                                                       | Q53GS9   | 1.03 | 0.89 | 1.06 | 1.00 | 0.09 | 14 | 28   | 3.6E-211 |
| IPI00419847 | SH3-containing adapter molecule 1                                                              | O60504-1 | 1.28 | 1.34 | 1.06 | 1.23 | 0.15 | 7  | 15.4 | 1.8E-112 |
| IPI00419856 | cDNA FLJ54538, highly similar to Transportin-2                                                 | B4DRY5   |      |      | 1.10 | 1.10 |      | 9  | 10.9 | 1.6E-109 |
| IPI00419880 | 40S ribosomal protein S3a                                                                      | P61247   | 0.80 | 0.86 | 0.84 | 0.84 | 0.03 | 25 | 70.8 | 0        |
| IPI00419894 | CCAAT displacement protein                                                                     | P39880-3 |      |      | 0.91 | 0.91 |      | 2  | 1.5  | 8.34E-06 |
| IPI00419903 | Aspartate dehydrogenase domain-containing protein                                              | A6ND91   | 1.00 | 1.12 |      | 1.06 | 0.08 | 2  | 5.7  | 0.001907 |
| IPI00419932 | Putative Ras-related protein Rab-12                                                            | Q6IQ22   | 0.88 | 1.21 | 1.10 | 1.07 | 0.17 | 7  | 32   | 3.83E-87 |
| IPI00419979 | C-t-PAK2                                                                                       | Q13177   | 1.15 | 1.18 | 1.04 | 1.12 | 0.08 | 11 | 31   | 6.1E-188 |
| IPI00420014 | Activating signal cointegrator 1 complex subunit 3-like 1                                      | O75643-1 | 0.96 | 1.02 | 1.02 | 1.00 | 0.04 | 41 | 23.9 | 0        |
| IPI00420084 | BH3-interacting domain death agonist                                                           | P55957-2 | 1.14 |      | 0.94 | 1.04 | 0.14 | 3  | 11.2 | 1.1E-99  |
| IPI00420108 | 2-oxoglutarate dehydrogenase complex component E2                                              | P36957   | 1.11 | 1.05 | 1.05 | 1.07 | 0.03 | 8  | 21   | 0        |
| IPI00423156 | Cds1                                                                                           | O96017-9 |      |      | 1.07 | 1.07 |      | 2  | 7.7  | 4.18E-16 |
| IPI00423570 | c-Ki-ras                                                                                       | P01116-2 |      |      | 1.33 | 1.33 |      | 4  | 26.6 | 4.22E-67 |
| IPI00424460 | Endofin                                                                                        | Q7Z3T8-1 | 1.04 |      | 1.01 | 1.02 | 0.02 | 3  | 3.9  | 1.98E-53 |
| IPI00427242 | rRNA-processing protein FCF1 homolog                                                           | Q9Y324   | 0.93 | 0.92 |      | 0.92 | 0.01 | 2  | 10.1 | 9.54E-20 |
| IPI00427330 | Ribosome maturation protein SBDS                                                               | Q9Y3A5   | 0.75 | 1.07 | 1.02 | 0.94 | 0.17 | 14 | 53.2 | 7.9E-226 |
| IPI00428288 | 39S ribosomal protein L43, mitochondrial                                                       | Q8N983-4 | 0.93 | 0.95 | 0.94 | 0.94 | 0.01 | 7  | 42.1 | 3.79E-58 |
| IPI00428967 | Toll-like receptor adapter molecule 2 (TICAM-2) (Putative NF-kappa-B- activating protein 502). | Q6JUT2   | 0.85 | 1.06 | 1.15 | 1.02 | 0.15 | 5  | 15.6 | 9.35E-16 |

|             |                                                                                       |          |      |      |      |      |      |    |      |          |
|-------------|---------------------------------------------------------------------------------------|----------|------|------|------|------|------|----|------|----------|
| IPI00429191 | Eukaryotic peptide chain release factor subunit 1                                     | P62495   | 0.76 | 0.97 | 0.89 | 0.87 | 0.10 | 11 | 27.5 | 2.8E-159 |
| IPI00429538 | Protein yippee-like 5                                                                 | P62699   | 0.83 | 0.95 |      | 0.89 | 0.08 | 4  | 41.3 | 1.4E-138 |
| IPI00429689 | Serine/threonine-protein phosphatase 2A catalytic subunit beta isoform                | P62714   | 0.92 |      | 1.11 | 1.01 | 0.14 | 15 | 57   | 0        |
| IPI00430291 | Calcium/calmodulin-dependent protein kinase type II subunit delta                     | Q13557-1 |      |      | 1.07 | 1.07 |      | 9  | 26.1 | 8.4E-255 |
| IPI00430411 | Calcium/calmodulin-dependent protein kinase type IV                                   | Q16566   | 1.09 |      | 0.95 | 1.02 | 0.10 | 2  | 6.6  | 5.62E-52 |
| IPI00430472 | Activating signal cointegrator 1 complex subunit 3                                    | Q8N3C0   |      |      | 1.06 | 1.06 |      | 2  | 0.9  | 2.62E-05 |
| IPI00430803 | Uncharacterized protein C2orf79                                                       | Q6GMV3   | 1.19 | 1.07 |      | 1.13 | 0.09 | 3  | 15.7 | 5.27E-05 |
| IPI00430812 | Cellular nucleic acid-binding protein                                                 | P62633-1 | 0.97 | 0.98 | 0.94 | 0.96 | 0.02 | 11 | 57.1 | 0        |
| IPI00431082 | Coiled-coil domain-containing protein 5                                               | Q96CS2-1 | 1.03 | 0.84 | 1.05 | 0.97 | 0.12 | 5  | 20.1 | 4.63E-50 |
| IPI00432363 | Microtubule-actin cross-linking factor 1, isoform 4                                   | Q96PK2   |      | 0.92 |      | 0.92 |      | 36 | 8    | 0        |
| IPI00438170 | Sorting nexin-12                                                                      | Q9JMY4-1 | 1.21 | 1.15 | 1.07 | 1.14 | 0.07 | 9  | 44.8 | 4.76E-82 |
| IPI00438229 | KRAB-associated protein 1                                                             | Q13263-1 | 1.07 | 1.10 | 1.02 | 1.06 | 0.04 | 31 | 53.9 | 0        |
| IPI00438286 | Densin-180-like protein                                                               | Q96RT1-1 | 0.98 | 1.24 | 1.08 | 1.10 | 0.13 | 6  | 6.1  | 2.42E-47 |
| IPI00439194 | Methyl-CpG-binding domain protein 3                                                   | O95983-1 | 1.12 | 1.33 | 1.17 | 1.21 | 0.11 | 6  | 22   | 2.2E-69  |
| IPI00439948 | Inhibitor of ASPP protein                                                             | Q8WUF5-1 | 0.92 | 0.98 | 0.77 | 0.89 | 0.11 | 19 | 36.1 | 3.3E-205 |
| IPI00440493 | ATP synthase subunit alpha, mitochondrial                                             | P25705   | 1.07 | 0.96 | 1.03 | 1.02 | 0.06 | 32 | 61.1 | 0        |
| IPI00440502 | Bromodomain-containing protein 2                                                      | P25440-2 | 1.23 | 1.48 | 0.98 | 1.23 | 0.25 | 4  | 6    | 7.14E-16 |
| IPI00440688 | cDNA FLJ54030, highly similar to Polymerase delta-interacting protein 3               | B4E0L0   | 1.18 | 1.37 | 1.19 | 1.25 | 0.10 | 9  | 29.2 | 1.7E-106 |
| IPI00440703 | cDNA FLJ76598, highly similar to Homo sapiens glutathione S-transferase kappa 1, mRNA | Q6P4H0   | 0.97 |      | 1.19 | 1.08 | 0.15 | 3  | 14.9 | 2.48E-62 |
| IPI00440719 | ARD1 homolog A, N-acetyltransferase (S. cerevisiae), isoform CRA_b                    | A6NM98   |      |      | 0.86 | 0.86 |      | 11 | 43.2 | 1.8E-157 |
| IPI00440727 | Bromodomain-containing protein 4                                                      | O60885-1 |      |      | 1.04 | 1.04 |      | 3  | 3.6  | 9.51E-09 |
| IPI00440932 | Cellular disintegrin-related protein                                                  | Q13443-1 | 0.99 | 1.40 | 1.37 | 1.25 | 0.23 | 5  | 10.6 | 8.2E-67  |
| IPI00441473 | 72 kDa ICln-binding protein                                                           | O14744   | 0.88 | 0.87 | 0.85 | 0.87 | 0.01 | 14 | 27.2 | 8.7E-178 |
| IPI00441867 | 33 kDa housekeeping protein                                                           | P40855-1 | 1.32 | 0.91 |      | 1.12 | 0.29 | 2  | 13   | 3.7E-114 |
| IPI00442073 | Cysteine and glycine-rich protein 1                                                   | P21291   | 0.70 | 1.00 | 0.98 | 0.89 | 0.17 | 14 | 69.4 | 0        |

|             |                                                                                                                                          |          |      |      |      |      |      |    |      |          |
|-------------|------------------------------------------------------------------------------------------------------------------------------------------|----------|------|------|------|------|------|----|------|----------|
| IPI00442210 | Abelson interactor 2                                                                                                                     | Q9NYB9-1 |      | 1.44 | 0.90 | 1.17 | 0.38 | 2  | 7    | 2.63E-16 |
| IPI00442821 | CDNA FLJ26613 fis, clone MPB05565, highly similar to Serine/threonine protein phosphatase 2A, 55 kDa regulatory subunit B, alpha isoform | Q6ZP32   | 0.91 |      |      | 0.91 |      | 7  | 16.5 | 7.75E-69 |
| IPI00443909 | MIR-interacting saposin-like protein                                                                                                     | Q9Y2B0-1 | 1.14 | 1.00 | 0.96 | 1.03 | 0.09 | 10 | 60.4 | 9.9E-251 |
| IPI00444329 | cDNA FLJ45695 fis, clone FEBRA2013570, highly similar to 2-oxoisovalerate dehydrogenase alpha subunit, mitochondrial (EC 1.2.4.4)        | Q6ZSA3   |      | 1.14 | 1.38 | 1.26 | 0.17 | 2  | 6.9  | 2.7E-12  |
| IPI00444371 | Rabphilin-11                                                                                                                             | Q5JSH3-1 |      | 0.87 | 0.95 | 0.91 | 0.05 | 3  | 3.9  | 3.64E-09 |
| IPI00444452 | Moloney leukemia virus 10 protein                                                                                                        | Q9HCE1-1 | 1.23 | 1.25 | 1.25 | 1.24 | 0.01 | 12 | 17.8 | 7.1E-193 |
| IPI00444646 | Putative uncharacterized protein SYNRG                                                                                                   | A6NEV4   |      | 1.04 |      | 1.04 |      | 4  | 4.6  | 1.04E-05 |
| IPI00444945 | Apoptosis regulator BAX                                                                                                                  | Q07812-2 | 1.19 | 1.15 | 1.07 | 1.13 | 0.06 | 6  | 32.1 | 6E-126   |
| IPI00446294 | Target of Myb-like protein 2                                                                                                             | Q6ZVM7-1 | 0.73 |      |      | 0.73 |      | 2  | 9.3  | 1.53E-79 |
| IPI00446875 | Endoplasmic reticulum-Golgi intermediate compartment protein 3                                                                           | Q9Y282-2 | 0.81 | 0.98 | 1.00 | 0.93 | 0.11 | 5  | 11.1 | 6.82E-33 |
| IPI00447051 | B-cell CLL/lymphoma 7 protein family member C                                                                                            | Q8WUZ0-2 | 1.37 |      |      | 1.37 |      | 2  | 9.1  | 0.000878 |
| IPI00448095 | Carbonyl reductase II                                                                                                                    | Q7Z4W1   | 1.16 | 1.34 | 1.27 | 1.25 | 0.09 | 9  | 43.4 | 4E-122   |
| IPI00448630 | Sterile alpha and Armadillo repeat protein                                                                                               | Q6SZW1-1 | 0.95 | 0.98 | 0.94 | 0.96 | 0.02 | 8  | 15.9 | 6.2E-106 |
| IPI00448798 | Casein kinase I isoform alpha                                                                                                            | P48729-2 | 0.82 | 1.06 | 1.00 | 0.96 | 0.12 | 7  | 19.5 | 1.1E-240 |
| IPI00449049 | NAD(+) ADP-ribosyltransferase 1                                                                                                          | P09874   | 1.01 | 1.11 | 1.07 | 1.06 | 0.05 | 48 | 50.6 | 0        |
| IPI00449197 | GMP reductase                                                                                                                            | Q6PKC0   | 0.91 |      | 1.05 | 0.98 | 0.10 | 3  | 10   | 1.02E-28 |
| IPI00450071 | SEN15 homolog                                                                                                                            | Q8WW01   |      |      | 1.02 | 1.02 |      | 2  | 22.8 | 3.02E-16 |
| IPI00450472 | Ubiquitin carrier protein                                                                                                                | B0QYN7   | 0.98 | 1.10 | 1.06 | 1.05 | 0.06 | 5  | 20.1 | 1.83E-51 |
| IPI00451941 | cDNA FLJ54848, highly similar to tRNA-splicing endonuclease subunit Sen34 (EC 3.1.27.9)                                                  | B4DT51   | 0.95 | 1.10 | 1.01 | 1.02 | 0.08 | 5  | 24   | 2.21E-14 |
| IPI00452731 | Complex I-B14.5a                                                                                                                         | O95182   | 0.72 |      | 1.23 | 0.97 | 0.36 | 3  | 31   | 1.07E-09 |
| IPI00453473 | Histone H4                                                                                                                               | P62805   | 1.17 | 0.99 | 1.06 | 1.07 | 0.09 | 15 | 65   | 1.6E-268 |
| IPI00455153 | HIRA-interacting protein 5                                                                                                               | Q9UMS0   | 1.06 | 0.87 | 0.84 | 0.92 | 0.12 | 7  | 30.3 | 4.4E-106 |
| IPI00455210 | ATP-dependent helicase CHD4                                                                                                              | Q14839-2 | 0.95 | 0.99 | 1.01 | 0.99 | 0.03 | 27 | 17.7 | 0        |
| IPI00455457 | Histone H3                                                                                                                               | Q5TEC6   | 1.27 | 0.94 | 1.18 | 1.13 | 0.17 | 10 | 47.8 | 3.83E-19 |
| IPI00455473 | C219-reactive peptide                                                                                                                    | Q5JRA6-1 | 1.14 | 1.01 | 1.03 | 1.06 | 0.07 | 9  | 7.7  | 4.65E-56 |
| IPI00456008 | ATP synthase-coupling factor 6, mitochondrial                                                                                            | P18859   |      |      | 1.06 | 1.06 |      | 2  | 24.1 | 8.2E-66  |

|             |                                                                                             |          |      |      |      |      |      |     |      |          |
|-------------|---------------------------------------------------------------------------------------------|----------|------|------|------|------|------|-----|------|----------|
| IPI00456048 | COMM domain-containing protein 2                                                            | Q86X83   | 1.00 | 1.09 | 1.01 | 1.03 | 0.05 | 2   | 7.5  | 0.002118 |
| IPI00456363 | Ataxin-2 domain protein                                                                     | Q8WWM7-3 | 1.05 | 1.01 | 0.92 | 0.99 | 0.07 | 18  | 20.4 | 1.2E-114 |
| IPI00456429 | 60S ribosomal protein L40                                                                   | P62987   | 0.69 |      |      | 0.69 |      | 10  | 60.2 | 1.9E-147 |
| IPI00456492 | Ciliary rootlet coiled-coil protein                                                         | Q5TZA2-1 | 1.17 |      |      | 1.17 |      | 4   | 1.6  | 7.18E-10 |
| IPI00456642 | HECT domain-containing protein 3                                                            | Q5T447-1 |      | 1.29 | 1.06 | 1.17 | 0.16 | 4   | 5.6  | 7.68E-71 |
| IPI00456664 | Nitrilase homolog 1                                                                         | Q86X76-3 | 1.04 | 1.24 | 1.14 | 1.14 | 0.10 | 5   | 13.9 | 4.22E-15 |
| IPI00456744 | SH3 domain-binding protein 1                                                                | Q9Y3L3-1 |      | 1.03 |      | 1.03 |      | 3   | 6    | 3.38E-12 |
| IPI00456758 | 60S ribosomal protein L27a                                                                  | P46776   | 0.87 | 0.92 | 0.82 | 0.87 | 0.05 | 7   | 39.9 | 2.91E-84 |
| IPI00456887 | Heterogeneous nuclear ribonucleoprotein U-like protein 2                                    | Q1KMD3   | 1.17 | 1.21 | 1.13 | 1.17 | 0.04 | 29  | 35.1 | 0        |
| IPI00456899 | RING finger protein 169                                                                     | Q8NCN4   |      |      | 0.74 | 0.74 |      | 2   | 3.1  | 0.001103 |
| IPI00456925 | Cervical mucin-associated protein                                                           | Q9UJU6-1 | 1.00 | 1.26 | 1.00 | 1.08 | 0.15 | 12  | 35.6 | 0        |
| IPI00456940 | 60S ribosomal protein L7-like 1                                                             | Q6DKI1   | 0.81 | 0.89 | 0.88 | 0.86 | 0.04 | 7   | 27.6 | 3.14E-25 |
| IPI00456969 | Cytoplasmic dynein 1 heavy chain 1                                                          | Q14204   | 1.08 | 0.96 | 1.01 | 1.01 | 0.06 | 137 | 33.4 | 0        |
| IPI00456983 | ATPase class VI type 11A                                                                    | P98196   |      | 0.92 |      | 0.92 |      | 2   | 1.5  | 0.013707 |
| IPI00457347 | Eukaryotic translation initiation factor 1b                                                 | O60739   | 0.71 | 1.18 | 1.10 | 0.99 | 0.25 | 5   | 23.5 | 3.57E-71 |
| IPI00464952 | Arginine-rich 54 kDa nuclear protein                                                        | Q05519   | 1.30 | 1.01 | 0.91 | 1.07 | 0.20 | 5   | 15.3 | 3.41E-39 |
| IPI00464979 | ATP-specific succinyl-CoA synthetase subunit beta                                           | Q9P2R7-1 | 0.92 | 1.21 | 1.05 | 1.06 | 0.14 | 7   | 15.3 | 2.1E-161 |
| IPI00464980 | Histone deacetylase complex subunit Sin3b                                                   | O75182-1 |      | 1.04 |      | 1.04 |      | 2   | 3.9  | 3.49E-29 |
| IPI00464999 | Amplified in breast cancer protein 1                                                        | Q6AI08   |      |      | 1.50 | 1.50 |      | 2   | 2.3  | 3.46E-41 |
| IPI00465028 | Triosephosphate isomerase                                                                   | Q53HE2   | 1.03 | 1.08 | 1.07 | 1.06 | 0.03 | 25  | 80.4 | 0        |
| IPI00465038 | cDNA FLJ50237, highly similar to Homo sapiens fibulin 2 (FBLN2), transcript variant 1, mRNA | B7Z6T9   | 0.77 | 1.36 | 1.31 | 1.15 | 0.33 | 17  | 21.4 | 7.2E-303 |
| IPI00465044 | Protein RCC2                                                                                | Q9P258   | 0.85 | 0.98 | 0.97 | 0.93 | 0.08 | 15  | 31   | 4.5E-107 |
| IPI00465054 | Putative uncharacterized protein DKFZp686C1054                                              | Q6MZT3   | 1.19 | 1.28 | 1.29 | 1.25 | 0.05 | 7   | 24.4 | 3.1E-102 |
| IPI00465059 | Mitochondrial Rho GTPase 2                                                                  | Q8IXI1-1 |      | 1.01 | 0.98 | 0.99 | 0.02 | 5   | 12.1 | 5.41E-51 |
| IPI00465070 | Histone H3.1                                                                                | P68431   | 1.16 |      |      | 1.16 |      | 11  | 39   | 6.37E-26 |
| IPI00465085 | FHA-HIT-interacting protein                                                                 | Q6XQN6-1 | 1.20 | 1.07 |      | 1.13 | 0.09 | 4   | 9.1  | 5.46E-77 |
| IPI00465132 | Coatomer subunit epsilon                                                                    | O14579   | 0.85 | 1.04 | 1.05 | 0.98 | 0.11 | 15  | 52.6 | 1.9E-301 |
| IPI00465139 | Acyl-CoA-desaturase 4                                                                       | Q86SK9-1 |      | 0.98 | 0.83 | 0.91 | 0.10 | 1   | 5.5  | 1.77E-06 |

|             |                                                                                                           |          |      |      |      |      |      |    |      |          |
|-------------|-----------------------------------------------------------------------------------------------------------|----------|------|------|------|------|------|----|------|----------|
| IPI00465160 | ATP-binding cassette sub-family F member 3                                                                | Q9NUQ8-1 | 0.79 | 1.26 | 1.07 | 1.04 | 0.24 | 10 | 19   | 1.7E-206 |
| IPI00465170 | 5-nucleotidase domain-containing protein 3                                                                | Q86UY8-1 | 0.88 |      |      | 0.88 |      | 2  | 5.3  | 9.92E-06 |
| IPI00465176 | 39S ribosomal protein L28, mitochondrial                                                                  | Q8TCC3-2 | 2.38 | 1.00 |      | 1.69 | 0.97 | 2  | 11   | 3.03E-07 |
| IPI00465179 | cDNA FLJ44241 fis, clone THYMU3008436, highly similar to 6-phosphofructokinase, muscle type (EC 2.7.1.11) | Q6ZTT1   | 1.07 | 1.04 | 1.04 | 1.05 | 0.02 | 16 | 19.5 | 3.4E-198 |
| IPI00465211 | HZGJ                                                                                                      | C9JHT3   | 0.90 | 1.01 | 1.05 | 0.99 | 0.07 | 9  | 15.4 | 6.4E-108 |
| IPI00465233 | Eukaryotic translation initiation factor 3, subunit E interacting protein                                 | B0QY89   | 0.91 | 0.98 | 0.92 | 0.94 | 0.04 | 19 | 35.9 | 0        |
| IPI00465248 | 2-phospho-D-glycerate hydro-lyase                                                                         | P06733-1 | 1.08 | 1.05 | 1.02 | 1.05 | 0.03 | 47 | 85.5 | 0        |
| IPI00465256 | Adenylate kinase 3                                                                                        | Q9UIJ7   | 1.30 | 1.04 | 1.11 | 1.15 | 0.13 | 11 | 48.9 | 3.5E-132 |
| IPI00465261 | Endoplasmic reticulum aminopeptidase 2                                                                    | Q6P179-1 | 2.13 |      |      | 2.13 |      | 1  | 1.7  | 0.010038 |
| IPI00465275 | BPM90                                                                                                     | Q96S59-1 | 0.95 | 1.12 | 1.12 | 1.06 | 0.10 | 3  | 5.8  | 2.7E-154 |
| IPI00465290 | DnaJ homolog subfamily C member 11                                                                        | Q9NVH1-1 | 0.82 | 0.91 | 0.80 | 0.84 | 0.06 | 6  | 15.7 | 1E-170   |
| IPI00465294 | Cell division cycle 5-like protein                                                                        | Q99459   | 1.10 | 1.16 | 1.04 | 1.10 | 0.06 | 27 | 39.4 | 1E-297   |
| IPI00465296 | Exportin-6                                                                                                | Q96QU8   | 0.96 |      | 1.04 | 1.00 | 0.05 | 4  | 5.5  | 3.37E-38 |
| IPI00465308 | GPI transamidase component PIG-S                                                                          | Q96S52-1 | 1.06 | 1.00 | 1.40 | 1.15 | 0.21 | 4  | 11.7 | 7.23E-56 |
| IPI00465315 | Cytochrome c                                                                                              | P99999   | 0.69 | 1.05 | 0.85 | 0.86 | 0.18 | 4  | 38.1 | 1.81E-26 |
| IPI00465361 | 60S ribosomal protein L13                                                                                 | P26373   | 0.96 | 0.83 | 0.87 | 0.89 | 0.07 | 16 | 45.5 | 4.7E-114 |
| IPI00465373 | Cysteine-S-conjugate beta-lyase 2                                                                         | Q6YP21-1 | 1.35 | 1.09 | 1.43 | 1.29 | 0.18 | 3  | 12.3 | 2.33E-42 |
| IPI00465377 | Matrix-remodeling-associated protein 7                                                                    | P84157-1 | 1.33 |      | 0.96 | 1.14 | 0.26 | 3  | 23   | 2.17E-36 |
| IPI00465387 | Cell division cycle-associated protein 2                                                                  | Q69YH5-1 | 1.60 |      | 0.94 | 1.27 | 0.47 | 3  | 5.1  | 6.22E-07 |
| IPI00465431 | 35 kDa lectin                                                                                             | P17931   | 1.57 | 1.54 | 1.67 | 1.59 | 0.07 | 9  | 37.2 | 4.35E-60 |
| IPI00465432 | Nodal modulator 2                                                                                         | Q5JPE7-1 |      |      | 0.99 | 0.99 |      | 20 | 22.3 | 7.3E-260 |
| IPI00465436 | Catalase                                                                                                  | P04040   | 0.99 | 1.05 | 1.01 | 1.02 | 0.03 | 15 | 31.1 | 1.2E-259 |
| IPI00465443 | TSG-9                                                                                                     | Q2TAM9   | 1.17 | 0.82 | 1.03 | 1.01 | 0.18 | 2  | 14.6 | 5.39E-30 |
| IPI00470422 | Ankyrin repeat and MYND domain-containing protein 2                                                       | Q659G1   |      | 1.05 |      | 1.05 |      | 3  | 6.5  | 0.000739 |
| IPI00470498 | PAI1 RNA-binding protein 1                                                                                | Q8NC51-3 |      | 0.63 | 0.80 | 0.71 | 0.12 | 26 | 56   | 0        |
| IPI00470502 | Inorganic pyrophosphatase 2, mitochondrial                                                                | Q9H2U2-2 | 1.49 | 1.12 | 0.88 | 1.16 | 0.31 | 6  | 24.4 | 8.2E-155 |
| IPI00470528 | 60S ribosomal protein L15                                                                                 | P61313   | 0.83 | 0.87 | 0.88 | 0.86 | 0.02 | 10 | 37.3 | 7.4E-125 |
| IPI00470537 | AT-rich interactive domain-containing protein 2                                                           | Q68CP9-1 | 1.17 |      |      | 1.17 |      | 2  | 1.4  | 0.002326 |

|             |                                                          |          |      |      |      |      |      |    |      |          |
|-------------|----------------------------------------------------------|----------|------|------|------|------|------|----|------|----------|
| IPI00470559 | Ankyrin repeat domain-containing protein 25              | Q63ZY3-1 | 0.96 | 1.81 | 1.43 | 1.40 | 0.43 | 11 | 18.9 | 8.8E-155 |
| IPI00470573 | cDNA FLJ51656, highly similar to Actin-like protein 2    | B4DHK9   | 0.91 | 1.03 | 1.06 | 1.00 | 0.08 | 17 | 41.1 | 0        |
| IPI00470576 | Leucine-rich repeat-containing protein 57                | Q8N9N7   | 1.10 | 1.38 | 1.21 | 1.23 | 0.14 | 8  | 34.3 | 2.53E-33 |
| IPI00470594 | Putative MAPK-activating protein PM18/PM20/PM22          | Q7Z422-1 | 1.21 |      |      | 1.21 |      | 4  | 32.2 | 1.19E-12 |
| IPI00470596 | Cutaneous T-cell lymphoma-associated antigen se33-1      | Q14966-1 | 1.04 | 0.79 | 0.80 | 0.88 | 0.14 | 10 | 6.5  | 4.81E-24 |
| IPI00470606 | tRNA guanosine-2-O-methyltransferase TRM11 homolog       | Q7Z4G4-1 |      | 0.80 | 0.93 | 0.86 | 0.09 | 2  | 5.8  | 4.57E-11 |
| IPI00470610 | Proline-5-carboxylate reductase 2                        | Q96C36   | 0.98 | 0.91 | 0.91 | 0.93 | 0.04 | 6  | 20.9 | 1.4E-217 |
| IPI00470649 | Nicalin                                                  | Q969V3-1 | 1.04 | 0.95 | 0.97 | 0.99 | 0.04 | 12 | 25.6 | 1.7E-176 |
| IPI00470674 | Humb5R2                                                  | Q9UHQ9   | 0.94 | 1.15 | 1.15 | 1.08 | 0.12 | 3  | 9.2  | 1.11E-05 |
| IPI00470779 | Alpha-taxilin                                            | P40222   | 0.97 | 1.01 | 1.00 | 0.99 | 0.02 | 22 | 48.2 | 9.1E-272 |
| IPI00470883 | Stromal antigen 2                                        | B1AMT5   |      | 1.26 |      | 1.26 |      | 3  | 2.8  | 8.87E-13 |
| IPI00472073 | HLA class I histocompatibility antigen, B-59 alpha chain | Q29940   |      | 1.05 |      | 1.05 |      | 7  | 23.5 | 2.1E-163 |
| IPI00472160 | Guanine nucleotide exchange factor H1                    | Q92974-2 | 0.91 | 1.13 |      | 1.02 | 0.16 | 22 | 25.1 | 0        |
| IPI00472164 | Protein WAVE-2                                           | Q9Y6W5   |      | 1.22 | 1.10 | 1.16 | 0.08 | 6  | 14.9 | 1.47E-54 |
| IPI00472442 | 30 kDa prosomal protein                                  | P25786-2 | 1.02 | 1.03 | 1.09 | 1.05 | 0.04 | 14 | 44.6 | 8E-201   |
| IPI00472794 | FCH domain only protein 2                                | Q0JRZ9-1 |      | 1.03 | 1.44 | 1.23 | 0.29 | 3  | 7    | 1.85E-78 |
| IPI00472825 | HLA class I histocompatibility antigen, A-32 alpha chain | P10314   | 1.19 |      |      | 1.19 |      | 10 | 33.7 | 1.85E-86 |
| IPI00472939 | Microsomal signal peptidase 25 kDa subunit               | Q15005   | 0.78 | 1.03 | 1.17 | 0.99 | 0.20 | 11 | 46   | 4.7E-157 |
| IPI00473014 | Actin-depolymerizing factor                              | P60981   | 0.88 | 1.32 | 1.30 | 1.16 | 0.25 | 14 | 51.5 | 5.6E-209 |
| IPI00473047 | 5-AMP-activated protein kinase subunit gamma-1           | P54619   | 0.92 | 1.00 | 1.10 | 1.01 | 0.09 | 5  | 15.3 | 8.04E-26 |
| IPI00473085 | Dnm1p/Vps1p-like protein                                 | O00429-4 | 1.01 | 1.23 | 1.10 | 1.11 | 0.11 | 38 | 62.5 | 0        |
| IPI00473118 | Matrilin-2                                               | O00339-1 | 1.28 |      |      | 1.28 |      | 2  | 3.4  | 2.59E-09 |
| IPI00477001 | Cell cycle autoantigen SG2NA                             | Q13033-2 |      | 1.07 |      | 1.07 |      | 4  | 6.6  | 1.02E-41 |
| IPI00477040 | Nucleoporin NUP188 homolog                               | Q5SRE5-1 | 0.90 |      | 1.05 | 0.98 | 0.11 | 3  | 2.2  | 2.07E-10 |
| IPI00477118 | Transmembrane protein 214                                | Q6NUQ4   | 0.88 | 1.18 | 1.30 | 1.12 | 0.21 | 5  | 9.3  | 5.54E-06 |
| IPI00477231 | Beta-hexosaminidase                                      | O60502-1 | 1.15 | 1.39 | 1.20 | 1.25 | 0.13 | 6  | 7.6  | 3.4E-59  |
| IPI00477313 | Heterogeneous nuclear ribonucleoproteins                 | P07910-1 | 1.09 |      |      | 1.09 |      | 21 | 50.3 | 0        |



|             | C1/C2                                                                |          |      |      |      |      |      |    |      |          |  |
|-------------|----------------------------------------------------------------------|----------|------|------|------|------|------|----|------|----------|--|
| IPI00477355 | KIF1-binding protein                                                 | Q96EK5   | 0.89 | 1.22 | 1.25 | 1.12 | 0.20 | 5  | 12.6 | 2.5E-235 |  |
| IPI00477468 | RNA polymerase-associated protein CTR9 homolog                       | Q6PD62   |      |      | 0.97 | 0.97 |      | 2  | 2.5  | 0.008216 |  |
| IPI00477494 | Dr1-associated corepressor                                           | Q14919-2 | 1.20 | 1.01 | 1.15 | 1.12 | 0.09 | 2  | 9.9  | 1.64E-08 |  |
| IPI00477505 | Ankyrin repeat domain-containing protein 28                          | O15084-1 |      |      | 0.84 | 0.84 |      | 3  | 3.8  | 5.83E-27 |  |
| IPI00477526 | UPF0550 protein C7orf28                                              | O95766   |      | 2.71 |      | 2.71 |      | 2  | 5.4  | 5.37E-06 |  |
| IPI00477661 | Zinc finger protein 91 homolog                                       | Q96JP5-1 | 1.15 | 1.01 | 1.16 | 1.11 | 0.08 | 3  | 10.4 | 5.06E-48 |  |
| IPI00477686 | ATP-dependent helicase GTF2F2                                        | P13984   | 1.05 | 0.98 | 1.00 | 1.01 | 0.04 | 9  | 41.4 | 2.82E-23 |  |
| IPI00477763 | CDC42-binding protein kinase beta                                    | Q9Y552   |      | 1.08 |      | 1.08 |      | 2  | 1.5  | 0.000953 |  |
| IPI00477802 | Nuclear phosphoprotein p21/SIIR                                      | Q15170-2 | 5.00 | 1.54 | 1.67 | 2.74 | 1.96 | 1  | 7.5  | 5.69E-16 |  |
| IPI00477806 | TSC22 domain family protein 2                                        | O75157-1 | 1.33 |      | 0.71 | 1.02 | 0.44 | 4  | 13.8 | 1.73E-13 |  |
| IPI00477971 | Transducin beta-like protein 3                                       | Q12788   | 0.75 | 0.91 | 0.85 | 0.83 | 0.08 | 14 | 26.2 | 1E-216   |  |
| IPI00478068 | Glutathione S-transferase C-terminal domain-containing protein       | Q8NEC7   | 1.09 |      | 0.86 | 0.98 | 0.17 | 3  | 6.6  | 2.98E-16 |  |
| IPI00478127 | Transcription elongation factor A protein-like 3                     | Q969E4   |      | 1.40 |      | 1.40 |      | 4  | 22.5 | 7.5E-102 |  |
| IPI00478128 | cDNA FLJ60209, highly similar to Transcriptional repressor p66 alpha | B4E0Q6   | 0.99 | 0.89 | 0.97 | 0.95 | 0.05 | 7  | 15   | 1.71E-25 |  |
| IPI00478229 | Ribonuclease P (30kD) (RPP30)                                        | Q5VU11   | 0.89 | 1.07 | 0.91 | 0.96 | 0.10 | 7  | 24.4 | 1.5E-23  |  |
| IPI00478230 | Retinoblastoma-binding protein 5                                     | Q15291-1 |      | 1.22 |      | 1.22 |      | 2  | 3.7  | 0.000535 |  |
| IPI00478231 | Rho cDNA clone 12                                                    | P61586   | 0.83 | 1.11 | 1.14 | 1.03 | 0.17 | 11 | 46.1 | 1.7E-212 |  |
| IPI00478278 | 26S proteasome-associated UCH37-interacting protein 1                | Q99871-2 |      |      | 0.95 | 0.95 |      | 3  | 13.1 | 6.43E-59 |  |
| IPI00478390 | Cyclin-dependent kinase inhibitor 2A, isoform 4                      | Q8N726   |      |      | 1.58 | 1.58 |      | 1  | 11   | 0.002415 |  |
| IPI00478410 | ATP synthase subunit gamma, mitochondrial                            | P36542-1 | 1.02 | 0.96 | 1.04 | 1.01 | 0.04 | 10 | 34.9 | 2.13E-55 |  |
| IPI00478450 | Complex I-ESSS                                                       | Q9NX14-2 | 1.18 | 0.99 | 1.14 | 1.10 | 0.10 | 2  | 20.9 | 8.25E-52 |  |
| IPI00478496 | Ribonuclease P protein subunit p40                                   | O75818-1 |      | 0.88 | 0.80 | 0.84 | 0.06 | 3  | 16.3 | 4.8E-100 |  |
| IPI00478521 | Rab-interacting lysosomal-like protein 1                             | Q5EBL4-1 |      |      | 0.85 | 0.85 |      | 1  | 2.7  | 0.005512 |  |
| IPI00478657 | G-rich sequence factor 1                                             | Q12849   | 0.71 | 0.83 | 0.83 | 0.79 | 0.07 | 7  | 21   | 5.7E-23  |  |
| IPI00478758 | UPF0557 protein C10orf119                                            | Q9BTE3-1 | 0.86 | 1.26 | 1.14 | 1.09 | 0.20 | 5  | 11.5 | 4.63E-64 |  |
| IPI00478834 | Arginine and glutamate-rich protein 1                                | Q9NWB6-1 | 1.27 |      |      | 1.27 |      | 4  | 11.7 | 9.72E-07 |  |
| IPI00478838 | Fatty acyl-CoA reductase 1                                           | Q8WVX9   | 0.67 |      | 0.67 | 0.67 | 0.00 | 3  | 7.4  | 1.62E-21 |  |

|             |                                                                         |          |      |      |      |      |      |    |      |          |
|-------------|-------------------------------------------------------------------------|----------|------|------|------|------|------|----|------|----------|
| IPI00479018 | Melanoma differentiation-associated protein 9                           | O00560-2 | 1.37 | 1.72 |      | 1.54 | 0.25 | 7  | 42.5 | 1.5E-195 |
| IPI00479058 | 40S ribosomal protein S15                                               | P62841   | 1.02 | 0.91 | 0.83 | 0.92 | 0.09 | 5  | 31   | 3.9E-114 |
| IPI00479125 | Formin-binding protein 2                                                | O75044   |      | 1.10 | 1.12 | 1.11 | 0.02 | 3  | 3.2  | 2.53E-22 |
| IPI00479186 | Cytosolic thyroid hormone-binding protein                               | P14618-1 | 1.05 | 1.18 | 1.17 | 1.13 | 0.07 | 49 | 77.4 | 0        |
| IPI00479191 | Heterogeneous nuclear ribonucleoprotein H                               | P31943   | 1.07 | 0.99 | 1.00 | 1.02 | 0.04 | 16 | 45.6 | 0        |
| IPI00479217 | Heterogeneous nuclear ribonucleoprotein U                               | Q00839-2 |      | 1.43 |      | 1.43 |      | 43 | 46.7 | 0        |
| IPI00479262 | Eukaryotic translation initiation factor 4 gamma 1                      | Q04637-3 |      | 0.97 | 0.91 | 0.94 | 0.04 | 48 | 32.4 | 0        |
| IPI00479306 | Macropain epsilon chain                                                 | P28074   | 0.94 | 0.93 | 1.03 | 0.97 | 0.05 | 13 | 43   | 0        |
| IPI00479307 | Cellular myosin heavy chain, type B                                     | P35580-2 | 1.03 | 1.06 |      | 1.04 | 0.02 | 83 | 41.8 | 0        |
| IPI00479385 | N-acetylserotonin O-methyltransferase-like protein                      | O95671-1 | 0.98 |      | 0.85 | 0.92 | 0.09 | 3  | 9.5  | 7.12E-41 |
| IPI00479534 | Cofactor required for Sp1 transcriptional activation, subunit 3, 130kDa | Q5JWT2   | 1.11 | 1.31 | 0.77 | 1.06 | 0.27 | 3  | 3.5  | 2.64E-17 |
| IPI00479571 | Putative uncharacterized protein DTNBP1                                 | A6NFV8   |      | 1.17 |      | 1.17 |      | 1  | 4.5  | 0.008359 |
| IPI00479676 | Cancer/testis antigen 89                                                | O60271-4 |      | 0.98 |      | 0.98 |      | 25 | 25.5 | 0        |
| IPI00479722 | 11S regulator complex subunit alpha                                     | Q06323   |      | 1.11 | 1.17 | 1.14 | 0.04 | 17 | 65.9 | 0        |
| IPI00479724 | CD11 antigen-like family member C                                       | P20702   | 1.13 |      |      | 1.13 |      | 1  | 0.8  | 0.00129  |
| IPI00479743 | ANKRD26-like family C member 1A                                         | Q6S8J3-1 | 1.03 |      | 0.76 | 0.90 | 0.19 | 14 | 11.8 | 0        |
| IPI00479786 | Far upstream element-binding protein 2                                  | Q92945-1 | 1.24 | 0.97 | 0.95 | 1.05 | 0.16 | 34 | 51.6 | 0        |
| IPI00479793 | Methionine-R-sulfoxide reductase B3, mitochondrial                      | Q8IXL7-2 | 1.01 |      | 1.09 | 1.05 | 0.06 | 2  | 31.8 | 9.01E-08 |
| IPI00479877 | 4-trimethylaminobutyraldehyde dehydrogenase                             | P49189   | 0.94 | 1.22 | 1.10 | 1.09 | 0.14 | 10 | 20.7 | 5.34E-92 |
| IPI00479905 | Complex I-PDSW                                                          | O96000   | 0.98 | 1.05 | 1.09 | 1.04 | 0.06 | 10 | 59.9 | 1.12E-91 |
| IPI00479997 | Leukemia-associated phosphoprotein p18                                  | P16949   | 1.61 | 1.22 | 1.20 | 1.34 | 0.23 | 20 | 79.2 | 5E-201   |
| IPI00480022 | Golgi complex-associated protein of 16 kDa                              | Q7Z5G4   | 0.97 | 1.31 | 1.32 | 1.20 | 0.20 | 3  | 27   | 4.22E-30 |
| IPI00480028 | Putative uncharacterized protein AB11                                   | A6NFN2   |      | 1.24 |      | 1.24 |      | 2  | 5.7  | 2.68E-19 |
| IPI00480056 | Ras-related protein Rab-4A                                              | P20338   | 1.12 | 1.17 | 1.16 | 1.15 | 0.03 | 9  | 42.2 | 6.9E-123 |
| IPI00480103 | Protein FAM83D                                                          | Q9H4H8-1 |      | 0.34 | 0.99 | 0.67 | 0.46 | 2  | 3.4  | 3.96E-06 |
| IPI00480142 | Cullin-4B                                                               | Q13620-2 | 1.14 | 1.22 | 1.18 | 1.18 | 0.04 | 28 | 32.2 | 0        |
| IPI00480187 | Histone lysine demethylase PHF8                                         | Q9UPP1-1 |      | 1.03 |      | 1.03 |      | 2  | 2.7  | 2.05E-12 |
| IPI00513791 | Dedicator of cytokinesis protein 7                                      | Q96N67-1 | 0.83 | 1.13 | 0.87 | 0.94 | 0.16 | 6  | 4.5  | 8.49E-26 |

|             |                                                                                                                |          |      |      |      |      |      |    |      |          |
|-------------|----------------------------------------------------------------------------------------------------------------|----------|------|------|------|------|------|----|------|----------|
| IPI00513805 | Mitochondrial ribosomal protein S18A                                                                           | A6XND3   | 1.01 | 0.86 | 0.91 | 0.93 | 0.07 | 3  | 14.4 | 1.82E-38 |
| IPI00513827 | Putative uncharacterized protein DKFZp686M24262                                                                | Q5HYG7   | 0.91 | 0.98 | 1.02 | 0.97 | 0.06 | 6  | 17.2 | 5.48E-73 |
| IPI00513833 | Transmembrane protein 9                                                                                        | B1ALM4   | 1.02 |      |      | 1.02 |      | 2  | 12.5 | 5.81E-19 |
| IPI00513853 | Syntaxin 12                                                                                                    | B1AJQ6   | 1.19 | 1.09 | 1.16 | 1.14 | 0.05 | 7  | 32.4 | 3.3E-211 |
| IPI00514021 | Guanylate kinase 1                                                                                             | B1ANH3   |      |      | 1.15 | 1.15 |      | 1  | 3.8  | 2.51E-07 |
| IPI00514027 | Heat shock protein 90kDa alpha (Cytosolic), class B member 1                                                   | Q5T9W8   |      | 0.01 |      | 0.01 |      | 14 | 53   | 0        |
| IPI00514173 | Cyclophilin-33B                                                                                                | Q3S611   | 1.04 | 1.09 |      | 1.07 | 0.03 | 8  | 22.3 | 5.62E-28 |
| IPI00514213 | Zinc finger, AN1-type domain 5                                                                                 | Q5QP81   | 0.96 | 0.80 | 0.85 | 0.87 | 0.08 | 2  | 19.6 | 2.4E-180 |
| IPI00514311 | CTTNBP2 N-terminal-like protein                                                                                | Q9P2B4   | 1.04 | 1.29 |      | 1.17 | 0.18 | 2  | 8    | 5.73E-21 |
| IPI00514340 | Methyltransferase-like protein 13                                                                              | Q8N6R0-5 |      | 1.09 | 1.13 | 1.11 | 0.03 | 4  | 5.3  | 1.51E-05 |
| IPI00514399 | Putative uncharacterized protein RPS27                                                                         | Q5T4L4   | 0.62 | 0.83 | 0.70 | 0.72 | 0.10 | 4  | 39.4 | 5.22E-40 |
| IPI00514424 | Palmitoyl-protein thioesterase 1                                                                               | Q5T0S6   | 0.94 | 0.79 | 0.94 | 0.89 | 0.09 | 6  | 29   | 1.98E-86 |
| IPI00514501 | Chromosome 1 open reading frame 57                                                                             | Q5TDF0   | 1.15 | 1.11 | 1.12 | 1.13 | 0.02 | 7  | 38.2 | 7.16E-56 |
| IPI00514506 | 39S ribosomal protein L24, mitochondrial                                                                       | Q96A35   | 0.92 | 0.85 | 0.88 | 0.88 | 0.03 | 6  | 20.8 | 8.84E-09 |
| IPI00514550 | cDNA FLJ40556 fis, clone THYMU2002583, highly similar to DYNAMIN 2                                             | Q8N1K8   |      |      | 1.07 | 1.07 |      | 19 | 29   | 3.25E-96 |
| IPI00514558 | Polyamine-modulated factor 1                                                                                   | Q6P1K2-2 |      | 1.20 |      | 1.20 |      | 2  | 13.5 | 6.56E-34 |
| IPI00514587 | Seryl-tRNA synthetase                                                                                          | Q5T5C7   | 0.87 | 1.09 | 1.04 | 1.00 | 0.12 | 27 | 53.4 | 0        |
| IPI00514593 | Tetratricopeptide repeat domain 4                                                                              | Q5TA95   | 0.83 |      | 0.86 | 0.85 | 0.02 | 3  | 15.1 | 2.97E-86 |
| IPI00514611 | Putative uncharacterized protein BCAP29                                                                        | A6NCU1   |      | 1.05 |      | 1.05 |      | 2  | 8.6  | 2.01E-05 |
| IPI00514619 | C2orf4 protein                                                                                                 | Q5R2V8   | 0.90 | 1.09 | 0.90 | 0.96 | 0.11 | 4  | 12.7 | 1E-115   |
| IPI00514622 | Ran-binding protein 6                                                                                          | O60518   | 0.98 | 1.17 | 1.11 | 1.09 | 0.10 | 10 | 11.4 | 2.84E-52 |
| IPI00514705 | WASH complex subunit FAM21C                                                                                    | Q9Y4E1-1 |      |      | 1.26 | 1.26 |      | 7  | 9.9  | 6.88E-49 |
| IPI00514769 | Ankyrin repeat domain-containing protein 28                                                                    | O15084-2 | 0.98 | 1.55 |      | 1.26 | 0.40 | 4  | 6.1  | 5.29E-21 |
| IPI00514832 | RING finger protein 109                                                                                        | Q9BRZ2-1 | 1.76 |      |      | 1.76 |      | 2  | 5.4  | 4.2E-205 |
| IPI00514856 | Protein NICE-4                                                                                                 | Q14157-2 | 1.35 | 1.01 | 0.97 | 1.11 | 0.21 | 15 | 22.3 | 0        |
| IPI00514863 | cDNA FLJ58025, highly similar to Homo sapiens mitochondrial translational release factor 1-like (MTRF1L), mRNA | B4DMX1   |      | 0.87 |      | 0.87 |      | 2  | 7.6  | 0.016899 |
| IPI00514926 | Guanylate kinase 1                                                                                             | B1ANH2   | 1.94 | 1.12 |      | 1.53 | 0.58 | 4  | 11.8 | 3.95E-06 |
| IPI00514951 | Golgi phosphoprotein 3-like                                                                                    | Q5T5I6   |      | 1.11 | 0.99 | 1.05 | 0.08 | 3  | 9.1  | 5.82E-30 |

|             |                                                              |          |      |      |      |      |      |    |      |          |
|-------------|--------------------------------------------------------------|----------|------|------|------|------|------|----|------|----------|
| IPI00515119 | Heat shock protein 90kDa alpha (Cytosolic), class B member 1 | Q5T9W5   | 0.94 | 0.99 |      | 0.96 | 0.04 | 16 | 73.5 | 0        |
| IPI00549189 | Endopeptidase 24.15                                          | P52888   | 1.00 | 1.02 | 1.03 | 1.02 | 0.01 | 19 | 28.9 | 1.6E-253 |
| IPI00549205 | DNA repair protein RAD50                                     | Q92878-2 | 1.07 | 1.00 | 1.11 | 1.06 | 0.05 | 9  | 10.2 | 7.6E-270 |
| IPI00549232 | Fibronectin type-III domain-containing protein 3A            | Q9Y2H6-1 |      |      | 1.10 | 1.10 |      | 2  | 2.8  | 2.12E-13 |
| IPI00549248 | Nucleolar phosphoprotein B23                                 | P06748-1 | 0.99 | 0.85 | 0.84 | 0.89 | 0.08 | 21 | 61.9 | 0        |
| IPI00549296 | SAP30-binding protein                                        | Q9UHR5-1 |      | 1.29 |      | 1.29 |      | 2  | 7.8  | 8.29E-08 |
| IPI00549343 | Cellubrevin                                                  | Q15836   | 1.18 | 1.21 | 1.21 | 1.20 | 0.02 | 7  | 50   | 0        |
| IPI00549361 | Polyamine-modulated factor 1                                 | Q6P1K2-1 | 0.97 |      | 0.89 | 0.93 | 0.06 | 3  | 17.1 | 1.07E-78 |
| IPI00549381 | 39S ribosomal protein L1, mitochondrial                      | Q9BYD6   | 0.95 | 0.75 | 0.82 | 0.84 | 0.10 | 7  | 25.8 | 3.3E-149 |
| IPI00549389 | Methyltransferase-like protein 11A                           | Q9BV86   | 0.85 | 0.90 | 0.95 | 0.90 | 0.05 | 5  | 18.8 | 6.83E-65 |
| IPI00549434 | Septin-8                                                     | Q92599-1 | 1.17 | 1.27 | 1.44 | 1.29 | 0.14 | 6  | 14.1 | 2.92E-51 |
| IPI00549467 | Nitrilase homolog 2                                          | Q9NQR4   | 0.91 | 1.03 | 1.04 | 0.99 | 0.07 | 9  | 43.5 | 2.6E-156 |
| IPI00549516 | Target of EGR1 protein 1                                     | Q96GM8   | 1.02 | 1.08 | 0.90 | 1.00 | 0.09 | 4  | 12.9 | 2.86E-35 |
| IPI00549540 | p21-activated protein kinase-interacting protein 1           | Q9NWT1   |      | 0.91 | 1.02 | 0.97 | 0.07 | 2  | 6.6  | 4.97E-24 |
| IPI00549564 | Acetoacetyl-CoA synthetase                                   | Q5QPH3   |      | 1.58 |      | 1.58 |      | 3  | 4.9  | 1.3E-31  |
| IPI00549664 | Testis-expressed sequence 10 protein                         | Q9NXF1   | 0.95 | 1.15 | 0.88 | 0.99 | 0.14 | 7  | 9.7  | 6.7E-124 |
| IPI00549672 | 26S proteasome non-ATPase regulatory subunit 13              | Q9UNM6   | 1.01 |      | 1.08 | 1.05 | 0.05 | 20 | 51.5 | 0        |
| IPI00549725 | BPG-dependent PGAM 1                                         | P18669   | 1.09 | 0.97 | 0.96 | 1.01 | 0.07 | 18 | 62.2 | 0        |
| IPI00549736 | Activating signal cointegrator 1 complex subunit 2           | Q9H1I8-1 | 0.84 | 1.33 | 0.87 | 1.01 | 0.28 | 3  | 5.3  | 0.000391 |
| IPI00549761 | Asparagine-linked glycosylation protein 1 homolog            | Q9BT22   |      |      | 0.98 | 0.98 |      | 1  | 2.8  | 0.000299 |
| IPI00549766 | Protein FAM40A                                               | Q5VSL9-1 | 0.99 | 1.22 | 1.25 | 1.15 | 0.14 | 5  | 8.2  | 2.42E-42 |
| IPI00550020 | Parathyrosin                                                 | P20962   | 1.37 | 0.84 | 1.36 | 1.19 | 0.30 | 4  | 23.5 | 1.21E-20 |
| IPI00550021 | 60S ribosomal protein L3                                     | P39023   | 0.87 | 0.93 | 0.89 | 0.90 | 0.03 | 23 | 50.6 | 9.8E-242 |
| IPI00550037 | 28S ribosomal protein S15, mitochondrial                     | P82914   | 1.01 | 0.86 | 0.94 | 0.94 | 0.08 | 9  | 24.5 | 1.78E-19 |
| IPI00550069 | Placental ribonuclease inhibitor                             | P13489   | 0.92 | 1.19 | 1.13 | 1.08 | 0.14 | 28 | 76.1 | 0        |
| IPI00550165 | Dehydrogenase/reductase SDR family member 7B                 | Q6IAN0   | 1.07 | 1.19 | 1.20 | 1.15 | 0.07 | 3  | 9.2  | 1.9E-65  |
| IPI00550181 | Charged multivesicular body protein 2b                       | Q9UQN3   | 1.14 | 1.30 | 1.09 | 1.18 | 0.11 | 5  | 22.5 | 5.75E-45 |

|             |                                                                           |          |      |      |      |      |      |    |      |          |
|-------------|---------------------------------------------------------------------------|----------|------|------|------|------|------|----|------|----------|
| IPI00550191 | Hepatocellular carcinoma-associated antigen 59                            | Q9NZ63   | 1.08 |      |      | 1.08 |      | 3  | 10.7 | 1.02E-09 |
| IPI00550192 | Aminopeptidase P3                                                         | Q9NQH7-1 | 0.89 | 1.01 | 1.04 | 0.98 | 0.08 | 3  | 10.1 | 4.2E-74  |
| IPI00550234 | Actin-related protein 2/3 complex subunit 5                               | O15511-1 | 1.02 | 1.17 | 1.20 | 1.13 | 0.10 | 11 | 72.8 | 9.3E-198 |
| IPI00550239 | Histone H1                                                                | P07305   | 1.03 | 1.11 | 1.21 | 1.12 | 0.09 | 6  | 29.4 | 1.57E-54 |
| IPI00550364 | Glucose phosphomutase 2                                                   | Q96G03   | 0.77 | 1.01 | 1.03 | 0.94 | 0.14 | 17 | 30.6 | 2.2E-93  |
| IPI00550380 | Transmembrane protein 160                                                 | Q9NX00   |      |      | 0.84 | 0.84 |      | 2  | 16   | 0.001102 |
| IPI00550440 | Transmembrane protein C2orf18                                             | Q8N357   | 0.85 | 0.96 |      | 0.90 | 0.08 | 1  | 3.2  | 4.35E-10 |
| IPI00550451 | Serine/threonine-protein phosphatase PP1-alpha catalytic subunit          | P62136   | 0.83 | 1.09 | 1.09 | 1.00 | 0.15 | 19 | 53   | 0        |
| IPI00550477 | Evolutionarily conserved G-patch domain-containing protein                | Q9BRR8   |      |      | 1.02 | 1.02 |      | 2  | 5.3  | 6.67E-12 |
| IPI00550523 | Atlastin-3                                                                | Q6DD88-1 | 0.91 | 1.13 | 1.26 | 1.10 | 0.18 | 14 | 36.4 | 7.6E-264 |
| IPI00550655 | Ovarian cancer-related protein                                            | Q9Y657   | 1.16 | 1.36 | 1.24 | 1.25 | 0.11 | 7  | 38.2 | 8.12E-58 |
| IPI00550689 | UPF0027 protein C22orf28                                                  | Q9Y310   | 0.86 | 1.08 | 1.06 | 1.00 | 0.12 | 22 | 55.2 | 2.6E-248 |
| IPI00550746 | Nuclear distribution protein C homolog                                    | Q9Y266   | 1.06 | 0.92 | 0.93 | 0.97 | 0.08 | 18 | 46.8 | 2.8E-134 |
| IPI00550766 | Novel nuclear protein 1                                                   | P56182   | 0.74 | 0.92 | 0.88 | 0.85 | 0.10 | 6  | 15.8 | 4.43E-92 |
| IPI00550781 | PRKR-interacting protein 1                                                | Q9H875   | 1.53 |      | 1.19 | 1.36 | 0.24 | 2  | 10.3 | 0.001338 |
| IPI00550815 | Proline-rich protein 14                                                   | Q9BWN1   |      | 0.82 |      | 0.82 |      | 1  | 1.4  | 0.010766 |
| IPI00550854 | Limitrin                                                                  | Q9BRK3-1 |      | 1.44 |      | 1.44 |      | 1  | 2    | 0.002725 |
| IPI00550882 | Pyrroline-5-carboxylate reductase                                         | B4DMU0   | 1.02 | 0.87 | 1.04 | 0.97 | 0.09 | 6  | 26.6 | 3.8E-109 |
| IPI00550917 | A6-related protein                                                        | Q6IBS0   | 1.24 | 1.25 | 1.14 | 1.21 | 0.06 | 13 | 46.4 | 3.8E-270 |
| IPI00550977 | Coiled-coil domain-containing protein 21                                  | Q6P2H3-1 |      |      | 0.55 | 0.55 |      | 2  | 4.5  | 3.26E-53 |
| IPI00550987 | Centrosomal protein 4                                                     | Q66GS9-1 | 1.10 |      |      | 1.10 |      | 1  | 1    | 0.017129 |
| IPI00550995 | Nucleolar protein 17 homolog                                              | Q9NWS0   | 1.02 |      | 1.04 | 1.03 | 0.01 | 3  | 16.2 | 1.4E-106 |
| IPI00551002 | cDNA FLJ55173, highly similar to Nuclear distribution protein nudE-like 1 | B4DS41   |      |      | 1.43 | 1.43 |      | 3  | 7.5  | 4.37E-08 |
| IPI00551024 | ATP-dependent dihydroxyacetone kinase                                     | Q3LXA3   |      | 1.56 | 1.40 | 1.48 | 0.11 | 5  | 12.9 | 1.16E-58 |
| IPI00551062 | CTG repeat protein 4a                                                     | Q9BT09-1 | 1.54 | 1.10 | 1.30 | 1.31 | 0.22 | 4  | 12.2 | 2.01E-87 |
| IPI00552073 | ATP-dependent RNA helicase #3                                             | O60231   | 0.98 | 1.07 | 0.97 | 1.00 | 0.06 | 11 | 13.3 | 1.1E-117 |
| IPI00552149 | PHD finger protein 6                                                      | Q5JRC6   | 1.10 | 1.35 | 1.11 | 1.19 | 0.14 | 9  | 31.1 | 1.87E-76 |
| IPI00552277 | Ubiquitin-like 4A                                                         | Q5HY81   |      | 1.13 | 1.00 | 1.07 | 0.09 | 7  | 41.7 | 7.65E-33 |

|             |                                                   |          |      |      |      |      |      |     |      |          |
|-------------|---------------------------------------------------|----------|------|------|------|------|------|-----|------|----------|
| IPI00552413 | C-2K                                              | P50750-2 | 0.89 | 1.14 | 1.07 | 1.04 | 0.13 | 8   | 17.4 | 3.2E-133 |
| IPI00552452 | Ubiquitin-like modifier activating enzyme 1       | Q5JRS2   |      | 1.21 | 1.79 | 1.50 | 0.41 | 8   | 26.9 | 8E-115   |
| IPI00552495 | Phosphoribosyl pyrophosphate synthetase 1         | B1ALA9   | 0.93 | 0.98 |      | 0.96 | 0.04 | 16  | 78.9 | 1.1E-163 |
| IPI00552569 | ATP-dependent helicase ERCC6-like                 | Q2NKX8   | 0.93 | 1.04 | 1.09 | 1.02 | 0.08 | 5   | 7.8  | 2.16E-94 |
| IPI00552587 | CKII beta-associating protein                     | Q8TAE8   | 0.96 | 0.81 | 0.87 | 0.88 | 0.08 | 6   | 32.4 | 2.25E-41 |
| IPI00552634 | Chromosome 20 open reading frame 27               | Q5JX81   | 1.08 | 0.89 | 0.91 | 0.96 | 0.11 | 3   | 20.1 | 1.2E-130 |
| IPI00552756 | Translation initiation factor IF-3, mitochondrial | Q9H2K0   |      | 1.17 |      | 1.17 |      | 1   | 4    | 4.86E-06 |
| IPI00552849 | Protein FAM76B                                    | Q5HYJ3-1 | 1.00 |      |      | 1.00 |      | 1   | 3.2  | 1.27E-23 |
| IPI00552897 | Mediator of DNA damage checkpoint protein 1       | Q14676-1 |      | 0.97 | 0.79 | 0.88 | 0.13 | 4   | 4.7  | 3.58E-31 |
| IPI00552920 | Exosome complex exonuclease RRP43                 | Q96B26   | 0.92 | 0.94 | 0.95 | 0.94 | 0.02 | 4   | 24.6 | 7.13E-31 |
| IPI00553067 | Coiled-coil domain-containing protein 132         | Q96JG6-1 |      |      | 0.66 | 0.66 |      | 2   | 3.2  | 2.41E-96 |
| IPI00553080 | Ubiquitously-expressed transcript                 | B1AJQ0   | 1.03 |      |      | 1.03 |      | 3   | 37   | 4.77E-34 |
| IPI00553131 | Galactowaldenase                                  | Q14376   | 0.85 |      | 1.20 | 1.02 | 0.24 | 4   | 16.1 | 1E-114   |
| IPI00553153 | ATPase inhibitor, mitochondrial                   | Q9UII2   | 1.07 | 1.02 |      | 1.04 | 0.03 | 4   | 22.4 | 2.18E-12 |
| IPI00553169 | Putative uncharacterized protein FLNA             | A6NDY9   | 0.96 | 1.00 | 1.00 | 0.99 | 0.02 | 139 | 68.9 | 0        |
| IPI00553175 | G patch domain-containing protein 6               | Q8N5A5-1 | 0.90 | 1.08 | 1.17 | 1.05 | 0.14 | 2   | 5.5  | 2.32E-40 |
| IPI00553185 | CCT-gamma                                         | P49368   | 0.84 | 0.97 | 0.92 | 0.91 | 0.06 | 36  | 62.2 | 0        |
| IPI00553199 | Rad51                                             | Q6TAR4   | 0.75 |      | 0.95 | 0.85 | 0.14 | 3   | 8.2  | 5.4E-125 |
| IPI00554436 | Arginine/serine-rich-splicing factor 14           | Q8IX01-3 | 1.17 |      |      | 1.17 |      | 4   | 6.3  | 4.71E-08 |
| IPI00554481 | 4F2 cell-surface antigen heavy chain              | P08195-4 | 0.71 | 0.81 | 0.97 | 0.83 | 0.13 | 8   | 16.9 | 3.03E-72 |
| IPI00554521 | Cell proliferation-inducing gene 15 protein       | P02794   | 1.41 | 1.27 | 1.36 | 1.34 | 0.07 | 4   | 22.4 | 2.03E-22 |
| IPI00554541 | Acetolactate synthase-like protein                | A1L0T0-1 | 0.93 | 1.00 | 1.25 | 1.06 | 0.16 | 6   | 14.6 | 2.48E-88 |
| IPI00554560 | Lysine-rich nucleolar protein 1                   | Q1ED39   |      | 2.50 | 1.10 | 1.80 | 0.99 | 3   | 10.3 | 4.82E-17 |
| IPI00554589 | Ferrochelatase                                    | Q8NAN0   | 1.44 | 0.85 | 1.02 | 1.10 | 0.30 | 4   | 13.3 | 4.39E-34 |
| IPI00554590 | Rab3 GTPase-activating protein 150 kDa subunit    | Q9H2M9-1 | 1.18 | 1.12 | 1.09 | 1.13 | 0.05 | 13  | 10.8 | 6.2E-39  |
| IPI00554681 | Complex I subunit B13                             | Q16718   |      | 1.13 | 1.06 | 1.10 | 0.05 | 5   | 44   | 9.97E-49 |
| IPI00554701 | Complex III subunit 9                             | Q9UDW1   |      | 0.84 |      | 0.84 |      | 1   | 27   | 6.86E-65 |
| IPI00554705 | dCMP deaminase                                    | P32321-2 | 0.90 | 0.95 | 1.06 | 0.97 | 0.08 | 5   | 36   | 3.6E-178 |
| IPI00554737 | Medium tumor antigen-associated 61 kDa protein    | P30153   | 0.90 | 1.06 | 1.03 | 1.00 | 0.09 | 32  | 57   | 0        |

|             |                                                                                                                 |          |      |      |      |      |      |    |      |          |
|-------------|-----------------------------------------------------------------------------------------------------------------|----------|------|------|------|------|------|----|------|----------|
| IPI00554742 | Antiapoptosis clone 11 protein                                                                                  | Q9BZZ5-2 | 1.01 | 1.12 | 1.03 | 1.06 | 0.06 | 21 | 44.2 | 2.5E-244 |
| IPI00554761 | High mobility group nucleosome-binding domain-containing protein 1                                              | P05114   |      | 0.97 |      | 0.97 |      | 1  | 14   | 0.012515 |
| IPI00554777 | Asparagine synthetase [glutamine-hydrolyzing]                                                                   | P08243   | 0.66 | 0.72 | 0.78 | 0.72 | 0.06 | 14 | 29.8 | 4.7E-208 |
| IPI00554788 | Cell proliferation-inducing gene 46 protein                                                                     | P05783   | 0.88 | 1.04 | 1.02 | 0.98 | 0.09 | 18 | 38.6 | 3.4E-270 |
| IPI00555565 | Putative heat shock protein HSP 90-beta 4                                                                       | Q58FF6   | 0.96 | 0.98 |      | 0.97 | 0.02 | 10 | 11.9 | 2.9E-161 |
| IPI00555597 | cDNA FLJ32471 fis, clone SKNMC2000322, highly similar to Peptidyl-tRNA hydrolase 2, mitochondrial (EC 3.1.1.29) | Q96ME4   | 0.96 | 0.90 | 0.95 | 0.94 | 0.03 | 5  | 35   | 1.5E-116 |
| IPI00555647 | Splicing factor, arginine/serine-rich 10 (Transformer 2 homolog, Drosophila) variant                            | Q59GA1   | 1.05 | 1.00 | 1.05 | 1.03 | 0.03 | 8  | 31.1 | 6.67E-94 |
| IPI00555703 | Transmembrane protein 41B                                                                                       | Q5BJD5-1 | 1.04 | 0.93 | 1.19 | 1.05 | 0.13 | 2  | 9.3  | 1.19E-40 |
| IPI00555744 | 60S ribosomal protein L14                                                                                       | P50914   | 0.82 | 0.87 | 0.84 | 0.84 | 0.03 | 12 | 45.5 | 1.4E-304 |
| IPI00555838 | ELKL motif kinase 1                                                                                             | Q7KZI7-1 |      |      | 0.95 | 0.95 |      | 4  | 7.5  | 8.37E-08 |
| IPI00555883 | Dnm1p/Vps1p-like protein                                                                                        | O00429-2 |      | 1.17 |      | 1.17 |      | 38 | 63.6 | 0        |
| IPI00555956 | 26 kDa prosomal protein                                                                                         | P28070   | 1.02 | 1.00 | 1.06 | 1.03 | 0.04 | 8  | 42.8 | 6.3E-213 |
| IPI00555957 | Heat shock 90 kDa protein 1 alpha-like 2                                                                        | Q58FG1   | 1.00 | 0.98 |      | 0.99 | 0.02 | 5  | 13.2 | 1.29E-77 |
| IPI00556027 | BAG family molecular chaperone regulator 5                                                                      | Q9UL15-2 |      |      | 0.90 | 0.90 |      | 2  | 7.6  | 5.53E-46 |
| IPI00556369 | 61E3.4                                                                                                          | Q96Q15-1 | 0.85 | 1.37 | 1.09 | 1.10 | 0.26 | 4  | 1.7  | 1.12E-25 |
| IPI00556385 | ADP-dependent glucokinase                                                                                       | Q9BRR6-1 | 1.05 | 0.54 |      | 0.80 | 0.36 | 5  | 16.1 | 6.4E-07  |
| IPI00556430 | Syntaxin 16 isoform a variant                                                                                   | Q59G13   | 1.10 |      |      | 1.10 |      | 2  | 6    | 5.13E-11 |
| IPI00556451 | Electron transfer flavoprotein subunit beta                                                                     | P38117-2 | 0.93 | 1.05 | 1.05 | 1.01 | 0.07 | 17 | 48.6 | 2.8E-229 |
| IPI00556494 | Activator-recruited cofactor 36 kDa component                                                                   | Q9NPJ6   |      |      | 0.66 | 0.66 |      | 5  | 26.7 | 3.57E-58 |
| IPI00556528 | Serine/threonine-protein phosphatase 2A 56 kDa regulatory subunit epsilon isoform                               | B5BTZ7   |      | 1.16 |      | 1.16 |      | 3  | 7.3  | 0        |
| IPI00556532 | Putative uncharacterized protein TAF9                                                                           | A8MSZ6   | 0.76 |      |      | 0.76 |      | 4  | 31.4 | 5.76E-09 |
| IPI00556553 | ATP-binding cassette sub-family B member 7, mitochondrial                                                       | O75027-2 |      |      | 1.00 | 1.00 |      | 2  | 4    | 0.010402 |
| IPI00556594 | Zinc finger CCHC domain-containing protein 8                                                                    | Q6NZY4-1 | 0.75 |      |      | 0.75 |      | 4  | 11   | 7.33E-09 |
| IPI00604464 | Ubiquitin-protein ligase E3C                                                                                    | Q15386-1 | 0.96 |      |      | 0.96 |      | 4  | 4.2  | 3.42E-20 |
| IPI00604523 | Myosin regulatory light chain MRCL3 variant                                                                     | Q53HL1   | 1.04 | 0.91 | 0.97 | 0.97 | 0.06 | 11 | 64.4 | 0        |
| IPI00604527 | Threonine--tRNA ligase                                                                                          | Q9BW92   |      | 0.68 | 0.70 | 0.69 | 0.01 | 5  | 8.9  | 7.85E-13 |
| IPI00604566 | DNA fragmentation factor 45 kDa subunit                                                                         | O00273-2 | 0.93 |      |      | 0.93 |      | 4  | 25   | 4.66E-81 |

|             |                                                                             |          |      |      |      |      |      |    |      |          |
|-------------|-----------------------------------------------------------------------------|----------|------|------|------|------|------|----|------|----------|
| IPI00604590 | Nucleoside diphosphate kinase                                               | Q32Q12   | 0.94 | 1.01 | 0.98 | 0.98 | 0.03 | 16 | 66.1 | 7.6E-279 |
| IPI00604598 | Bifunctional arginine demethylase and lysyl-hydroxylase JMJD6               | Q6NYC1-3 | 0.97 | 0.96 | 0.80 | 0.91 | 0.10 | 4  | 14   | 1.25E-70 |
| IPI00604620 | Nucleolin                                                                   | P19338   | 1.07 | 0.81 | 0.91 | 0.93 | 0.13 | 46 | 43.8 | 0        |
| IPI00604624 | Amyotrophic lateral sclerosis 2 chromosomal region candidate gene 1 protein | Q9GZT8-1 | 0.93 | 0.70 | 1.11 | 0.91 | 0.21 | 5  | 17.2 | 2.36E-35 |
| IPI00604647 | HPK/GCK-like kinase HGK                                                     | O95819-3 | 1.15 | 1.08 | 0.85 | 1.03 | 0.16 | 7  | 6.6  | 1.06E-60 |
| IPI00604664 | NADH-ubiquinone oxidoreductase 75 kDa subunit                               | B4DJA0   | 0.83 | 0.98 | 1.05 | 0.95 | 0.11 | 15 | 30   | 9.3E-260 |
| IPI00604756 | Nuclear receptor-binding protein                                            | Q9UHY1   | 1.09 | 1.16 | 1.18 | 1.14 | 0.05 | 8  | 19.4 | 5.15E-68 |
| IPI00604759 | Fumarylacetoacetate hydrolase domain containing 1                           | B1AK40   | 0.89 | 1.08 | 1.12 | 1.03 | 0.12 | 6  | 33.1 | 3.3E-119 |
| IPI00607554 | Deubiquitinating enzyme 47                                                  | Q96K76-1 |      | 1.19 | 1.20 | 1.19 | 0.00 | 6  | 6.3  | 5.73E-72 |
| IPI00607584 | Myb-binding protein 1A                                                      | Q9BQG0-2 | 0.92 | 0.88 | 0.80 | 0.87 | 0.06 | 22 | 20.9 | 4.6E-273 |
| IPI00607685 | Diadenosine 5,5-P1,P6-hexaphosphate hydrolase 2                             | Q9NZJ9-1 | 0.98 |      | 1.29 | 1.13 | 0.22 | 5  | 30.6 | 1.19E-23 |
| IPI00607799 | 3-hydroxybutyrate dehydrogenase type 2                                      | Q9BUT1-1 | 0.94 | 1.31 | 1.39 | 1.21 | 0.24 | 5  | 22   | 1.03E-58 |
| IPI00607861 | 6-phosphogluconolactonase                                                   | O95479   |      |      | 1.50 | 1.50 |      | 2  | 4    | 1.02E-30 |
| IPI00619921 | Death-associated transcription factor 1                                     | Q9BTC0-4 | 1.07 | 1.30 |      | 1.19 | 0.16 | 5  | 3.5  | 2.54E-27 |
| IPI00619930 | tRNA pseudouridine synthase A                                               | Q9Y606-1 | 1.03 |      | 0.81 | 0.92 | 0.16 | 4  | 11.7 | 1.32E-49 |
| IPI00639805 | Glutathione S-transferase Mu 2                                              | P28161   |      | 1.16 |      | 1.16 |      | 13 | 51.4 | 1.3E-104 |
| IPI00639811 | 40 kDa Rab9 effector protein                                                | Q7Z6M1-1 |      | 0.76 | 0.90 | 0.83 | 0.10 | 4  | 18.5 | 1.99E-16 |
| IPI00639841 | Delta(3),delta(2)-enoyl-CoA isomerase                                       | O75521-1 | 0.92 | 1.09 | 1.11 | 1.04 | 0.11 | 7  | 30.5 | 5.3E-50  |
| IPI00639925 | Exportin-6                                                                  | Q96QU8   |      | 1.21 |      | 1.21 |      | 4  | 4    | 2.02E-20 |
| IPI00639931 | Adenylyl cyclase-associated protein 1                                       | Q01518-2 |      |      | 1.09 | 1.09 |      | 32 | 62.4 | 0        |
| IPI00639957 | Coactivator-associated arginine methyltransferase 1, isoform CRA_b          | A6NN38   | 1.04 | 0.94 | 0.98 | 0.99 | 0.05 | 5  | 9.9  | 5.84E-52 |
| IPI00639982 | Putative uncharacterized protein DYNLT3                                     | A6NGJ0   |      | 1.36 | 1.15 | 1.26 | 0.15 | 1  | 11.2 | 3.05E-56 |
| IPI00640088 | Casein kinase 2 beta polypeptide                                            | Q5SRQ6   | 0.97 | 0.96 | 0.98 | 0.97 | 0.01 | 7  | 38   | 3E-219   |
| IPI00640197 | Tripeptidyl peptidase II                                                    | Q5VZU9   | 0.93 | 0.93 | 0.97 | 0.94 | 0.03 | 16 | 19.3 | 2.4E-129 |
| IPI00640276 | EF-hand domain-containing family member A1                                  | Q8IYU8   |      |      | 0.86 | 0.86 |      | 2  | 5.3  | 4.41E-75 |
| IPI00640316 | Putative uncharacterized protein ZNF414                                     | A8MY94   |      | 0.85 | 1.30 | 1.08 | 0.32 | 2  | 8.5  | 2.77E-44 |
| IPI00640341 | 38 kDa FK506-binding protein                                                | Q14318-1 |      | 1.14 | 1.24 | 1.19 | 0.07 | 9  | 27.2 | 1.4E-184 |



|             |                                                                                 |          |      |      |      |      |      |    |      |          |
|-------------|---------------------------------------------------------------------------------|----------|------|------|------|------|------|----|------|----------|
| IPI00640416 | NA                                                                              |          | 1.22 |      |      | 1.22 |      | 8  | 49.7 | 1.39E-40 |
| IPI00640525 | Carrier family 6, member 8 variant                                              | Q59EV6   | 1.12 | 1.09 | 1.22 | 1.14 | 0.07 | 4  | 8.2  | 3.2E-146 |
| IPI00640703 | Exportin-5                                                                      | Q9HAV4-1 | 0.73 | 0.88 | 0.90 | 0.84 | 0.09 | 17 | 17.6 | 1.4E-296 |
| IPI00640747 | Putative mitochondrial import inner membrane translocase subunit Tim23B         | Q5SRD1   |      | 0.80 |      | 0.80 |      | 2  | 10.5 | 4.82E-42 |
| IPI00640817 | Adenylate kinase 1 variant                                                      | Q53EY8   | 1.23 | 1.14 | 1.18 | 1.18 | 0.05 | 13 | 41.9 | 7.3E-93  |
| IPI00640818 | Neuropathy target esterase                                                      | Q8IY17-1 |      |      | 1.05 | 1.05 |      | 2  | 2.4  | 3.17E-10 |
| IPI00640833 | Acidic (Leucine-rich) nuclear phosphoprotein 32 family, member E                | Q5TB20   | 1.18 | 1.04 |      | 1.11 | 0.10 | 7  | 37.7 | 5.1E-213 |
| IPI00640867 | Putative uncharacterized protein GNAS                                           | A6NI00   |      | 1.19 |      | 1.19 |      | 11 | 38.5 | 6.89E-81 |
| IPI00641076 | cDNA FLJ56056                                                                   | B4DEQ9   |      | 0.71 | 0.95 | 0.83 | 0.17 | 3  | 3.7  | 2.95E-87 |
| IPI00641124 | cDNA FLJ55777, highly similar to DCN1-like protein 4                            | B4DH25   |      | 1.46 |      | 1.46 |      | 2  | 6.2  | 1.09E-05 |
| IPI00641177 | Protein FAM39A                                                                  | Q9NQA3   | 1.24 | 1.29 |      | 1.26 | 0.04 | 4  | 12.1 | 3.55E-86 |
| IPI00641181 | Macrophage myristoylated alanine-rich C kinase substrate                        | P49006   | 1.64 | 1.08 | 1.06 | 1.26 | 0.33 | 2  | 14.4 | 2.13E-23 |
| IPI00641330 | E3 ubiquitin-protein ligase RING1                                               | Q06587-1 |      |      | 1.22 | 1.22 |      | 1  | 3.4  | 9.58E-08 |
| IPI00641364 | Putative uncharacterized protein PPAN                                           | C9J3F9   | 0.82 |      | 0.85 | 0.83 | 0.02 | 4  | 5    | 7.32E-38 |
| IPI00641384 | Protein transport protein Sec16A                                                | O15027-1 |      | 1.54 |      | 1.54 |      | 4  | 4.4  | 6.2E-16  |
| IPI00641523 | PDZ domain-containing protein 11                                                | Q5EBL8-2 |      |      | 1.24 | 1.24 |      | 2  | 19.9 | 1.82E-40 |
| IPI00641582 | BAG family molecular chaperone regulator 3                                      | O95817   | 1.16 | 0.76 | 0.95 | 0.96 | 0.20 | 6  | 18.1 | 1.05E-44 |
| IPI00641635 | Alpha-ketoglutarate-dependent dioxygenase FTO                                   | Q9C0B1-1 | 0.77 |      | 1.19 | 0.98 | 0.30 | 5  | 12.4 | 2.65E-43 |
| IPI00641706 | 46 kDa protein                                                                  |          | 0.98 | 1.10 | 1.12 | 1.07 | 0.07 | 24 | 67.7 | 0        |
| IPI00641788 | U1 small nuclear ribonucleoprotein C                                            | Q53G33   | 1.00 | 1.15 |      | 1.08 | 0.11 | 6  | 37.2 | 1.46E-21 |
| IPI00641829 | 56 kDa U2AF65-associated protein                                                | Q13838-2 | 0.98 | 0.98 | 1.04 | 1.00 | 0.04 | 20 | 50.1 | 0        |
| IPI00641924 | 28S ribosomal protein S9, mitochondrial                                         | P82933   | 0.90 | 0.91 | 0.84 | 0.89 | 0.04 | 6  | 15.7 | 6.3E-155 |
| IPI00641973 | HCLS1-associated protein X-1                                                    | O00165-2 | 1.04 | 0.80 | 0.77 | 0.87 | 0.15 | 4  | 16   | 4.98E-56 |
| IPI00641990 | Protein LAS1 homolog                                                            | Q9Y4W2-1 | 0.82 | 1.03 | 1.02 | 0.95 | 0.12 | 11 | 19.5 | 1.3E-147 |
| IPI00642032 | cDNA, FLJ94230, highly similar to Homo sapiens thioredoxin-like 1 (TXNL1), mRNA | B2R960   | 0.94 | 1.01 | 1.02 | 0.99 | 0.04 | 14 | 49.2 | 0        |
| IPI00642105 | Neuronal cell death-related protein 7                                           | Q9HBM6   | 0.98 |      |      | 0.98 |      | 4  | 21.9 | 1.43E-07 |
| IPI00642211 | Aminopeptidase B                                                                | Q9H4A4   |      | 1.16 | 1.11 | 1.13 | 0.04 | 20 | 38.8 | 8E-164   |

|             |                                                                                           |          |      |      |      |      |      |    |      |          |
|-------------|-------------------------------------------------------------------------------------------|----------|------|------|------|------|------|----|------|----------|
| IPI00642238 | Heterochromatin protein 1-binding protein 3                                               | Q5SSJ5-1 | 1.50 | 1.35 | 1.31 | 1.39 | 0.10 | 16 | 31.3 | 6E-128   |
| IPI00642256 | CapZ beta                                                                                 | P47756-2 |      | 1.07 |      | 1.07 |      | 24 | 65.1 | 1.7E-270 |
| IPI00642259 | 230 kDa bullous pemphigoid antigen                                                        | Q5TBT2   |      | 0.95 | 2.32 | 1.64 | 0.97 | 9  | 1.9  | 4.2E-56  |
| IPI00642329 | Mitofusin-2                                                                               | O95140-1 |      | 0.92 | 0.79 | 0.85 | 0.09 | 4  | 6.5  | 3.84E-30 |
| IPI00642369 | cDNA FLJ60364, highly similar to Stat3-interacting protein                                | B4DXP0   |      |      | 0.74 | 0.74 |      | 4  | 5.2  | 1.1E-53  |
| IPI00642370 | Mpv17-like protein 2                                                                      | Q567V2-1 | 0.76 | 1.01 | 1.09 | 0.95 | 0.17 | 2  | 13.6 | 3.07E-12 |
| IPI00642374 | Ubiquitin carboxyl-terminal hydrolase L5                                                  | Q5LJA9   | 0.94 | 1.11 | 0.98 | 1.01 | 0.09 | 8  | 28.5 | 5.8E-127 |
| IPI00642542 | DJ639P13.2.2 (Acidic calponin 3)                                                          | Q9BWWY6  | 0.92 |      |      | 0.92 |      | 7  | 44.3 | 3.7E-250 |
| IPI00642584 | Uncharacterized protein KIAA0090                                                          | Q8N766-1 | 0.93 | 0.83 | 0.90 | 0.89 | 0.05 | 15 | 24.1 | 2.8E-134 |
| IPI00642798 | Nucleolar autoantigen No55                                                                | Q92791   | 1.20 | 1.19 | 1.13 | 1.17 | 0.04 | 4  | 8.7  | 1.01E-28 |
| IPI00642816 | Signal recognition particle 9 kDa protein                                                 | P49458   | 1.04 | 1.17 | 1.16 | 1.12 | 0.07 | 5  | 54.7 | 4.02E-71 |
| IPI00642862 | Cyclophilin-like protein PP14                                                             | Q8WUA2   | 0.90 | 1.14 | 1.02 | 1.02 | 0.12 | 9  | 23.8 | 1.12E-39 |
| IPI00642904 | PABPC4 protein                                                                            | Q3B867   | 0.76 | 1.11 | 0.94 | 0.93 | 0.17 | 22 | 37.9 | 0        |
| IPI00642971 | Antigen NY-CO-4                                                                           | P29692-2 | 0.91 | 0.85 | 0.83 | 0.86 | 0.04 | 14 | 25.2 | 0        |
| IPI00642984 | B-cell receptor-associated protein 31, isoform CRA_b                                      | B3KQ79   | 1.16 | 1.00 | 1.17 | 1.11 | 0.09 | 14 | 27.2 | 7.3E-275 |
| IPI00643152 | cDNA FLJ56386, highly similar to Heat shock 70 kDa protein 1L                             | B4DI54   |      |      | 0.86 | 0.86 |      | 14 | 24.3 | 5.7E-293 |
| IPI00643342 | cDNA FLJ38560 fis, clone HCHON2003642, highly similar to Astrocytic phosphoprotein PEA-15 | B1AKZ3   | 0.98 | 1.15 | 1.13 | 1.09 | 0.10 | 7  | 33.8 | 2.11E-43 |
| IPI00643554 | Regulator of G-protein signaling 10                                                       | O43665-3 | 1.13 | 1.02 | 0.98 | 1.05 | 0.08 | 8  | 47.5 | 9.7E-141 |
| IPI00643591 | cDNA FLJ30560 fis, clone BRAWH2004217, highly similar to AP-1 complex subunit gamma-1     | B3KNW1   | 1.06 | 1.12 | 1.20 | 1.13 | 0.07 | 10 | 14.3 | 1.39E-55 |
| IPI00643722 | AT-rich interactive domain-containing protein 1A                                          | O14497-1 |      | 1.36 | 0.99 | 1.17 | 0.26 | 9  | 6.5  | 1.4E-14  |
| IPI00643747 | Uncharacterized protein C22orf30                                                          | Q5THK1-1 | 1.16 |      |      | 1.16 |      | 1  | 0.8  | 0.004773 |
| IPI00643920 | cDNA FLJ54957, highly similar to Transketolase (EC 2.2.1.1)                               | B4DE31   | 1.00 | 1.09 | 1.13 | 1.07 | 0.07 | 32 | 51.7 | 0        |
| IPI00643994 | cDNA FLJ46245 fis, clone TESTI4020596, highly similar to Homo sapiens calpain 5 (CAPN5)   | Q6ZRM8   | 0.90 | 1.17 | 1.36 | 1.14 | 0.23 | 4  | 7.6  | 1.52E-48 |
| IPI00644008 | ELAV (Embryonic lethal, abnormal vision, Drosophila)-like 2 (Hu antigen B)                | B1AM49   | 1.03 |      |      | 1.03 |      | 3  | 8.5  | 9.13E-14 |
| IPI00644127 | Isoleucine--tRNA ligase                                                                   | P41252   | 0.90 | 0.93 | 0.95 | 0.93 | 0.02 | 36 | 34.9 | 0        |

|             |                                                                                                  |          |      |      |      |      |      |    |      |          |
|-------------|--------------------------------------------------------------------------------------------------|----------|------|------|------|------|------|----|------|----------|
| IPI00644231 | Cytoplasmic FMR1-interacting protein 1                                                           | Q7L576-1 | 1.05 | 1.16 | 1.08 | 1.09 | 0.06 | 28 | 25.3 | 2.2E-168 |
| IPI00644290 | NDRG family member 3                                                                             | Q5TH30   | 1.39 | 1.48 | 1.39 | 1.42 | 0.05 | 4  | 16.5 | 7.29E-40 |
| IPI00644297 | cDNA FLJ57529, highly similar to Helicase SKI2W (EC 3.6.1.-)                                     | B4DM01   |      | 0.80 |      | 0.80 |      | 2  | 2.8  | 1.33E-16 |
| IPI00644431 | cDNA FLJ55484, highly similar to ATP-dependent RNA helicase DDX39 (EC 3.6.1.-)                   | B4DX78   | 0.84 | 0.98 | 0.98 | 0.93 | 0.08 | 15 | 36.2 | 2.8E-170 |
| IPI00644482 | Hepatocellular carcinoma-susceptibility protein 3                                                | Q969U7   | 0.69 | 0.99 | 0.90 | 0.86 | 0.15 | 5  | 18.9 | 5.76E-21 |
| IPI00644620 | 35 kDa protein                                                                                   |          | 0.96 |      |      | 0.96 |      | 18 | 59.5 | 0        |
| IPI00644674 | Cytosolic Fe-S cluster assembly factor NUBP2                                                     | Q9Y5Y2   |      | 1.28 | 1.02 | 1.15 | 0.18 | 5  | 29.2 | 4.12E-73 |
| IPI00644697 | Heme-binding protein 2                                                                           | Q9Y5Z4-1 | 1.77 | 1.12 | 1.25 | 1.38 | 0.34 | 5  | 27.6 | 2.97E-57 |
| IPI00644708 | cDNA FLJ75459                                                                                    | A8K4L9   | 0.98 | 1.19 | 1.02 | 1.07 | 0.11 | 5  | 13.3 | 1.63E-42 |
| IPI00644712 | 70 kDa subunit of Ku antigen                                                                     | P12956   | 1.03 | 1.04 | 1.11 | 1.06 | 0.04 | 40 | 56   | 0        |
| IPI00644775 | Chronic myelogenous leukemia tumor antigen 28                                                    | Q9NQT4   | 0.95 | 1.27 | 0.95 | 1.06 | 0.19 | 5  | 24.6 | 3.04E-40 |
| IPI00644982 | Novel enoyl-CoA hydratase/isomerase family protein                                               | Q5TEG3   |      |      | 1.10 | 1.10 |      | 4  | 40.4 | 1.69E-17 |
| IPI00645078 | Protein A1S9                                                                                     | P22314   | 1.01 | 1.11 | 1.10 | 1.08 | 0.06 | 41 | 43   | 0        |
| IPI00645303 | Sorting nexin-27                                                                                 | Q96L92-1 |      | 1.41 | 1.04 | 1.22 | 0.26 | 4  | 7.6  | 2.26E-06 |
| IPI00645452 | cDNA FLJ50617, highly similar to Tubulin beta-7 chain                                            | B4DQN9   | 1.05 | 1.09 | 1.13 | 1.09 | 0.04 | 30 | 75.4 | 0        |
| IPI00645608 | Interferon regulatory factor 2-binding protein 1                                                 | Q8IU81   | 1.25 | 1.16 | 0.94 | 1.12 | 0.16 | 4  | 13.9 | 1.6E-18  |
| IPI00645702 | CTP synthase 2                                                                                   | Q9NRF8   | 1.10 | 1.24 | 1.11 | 1.15 | 0.08 | 6  | 13.1 | 3.37E-16 |
| IPI00645782 | cDNA FLJ58300, highly similar to Seryl-tRNA synthetase, mitochondrial (EC 6.1.1.11)              | B4DXB9   |      | 1.21 | 2.56 | 1.88 | 0.95 | 6  | 16.2 | 2.5E-103 |
| IPI00645849 | Extracellular matrix protein 1                                                                   | Q16610-4 | 1.92 | 1.58 | 1.59 | 1.70 | 0.20 | 4  | 12.2 | 2.03E-24 |
| IPI00646015 | Acyl-CoA thioester hydrolase 9                                                                   | Q9Y305-1 | 0.94 | 1.02 | 1.01 | 0.99 | 0.05 | 9  | 23   | 2.45E-31 |
| IPI00646058 | SAFB protein                                                                                     | A0AV56   | 1.29 | 0.92 | 0.90 | 1.03 | 0.22 | 13 | 19.4 | 1.87E-79 |
| IPI00646086 | 60S ribosomal protein L39                                                                        | C9JB44   | 0.83 |      | 0.81 | 0.82 | 0.02 | 1  | 10.1 | 2.66E-05 |
| IPI00646105 | Pyrroline-5-carboxylate reductase 3                                                              | Q53H96   | 0.82 | 1.07 | 0.92 | 0.94 | 0.12 | 6  | 32.5 | 2.58E-69 |
| IPI00646182 | cDNA FLJ55427, highly similar to Sodium/potassium-transporting ATPase alpha-1 chain (EC 3.6.3.9) | B7Z2T5   | 1.04 | 0.91 | 1.10 | 1.02 | 0.09 | 29 | 34.5 | 0        |
| IPI00646240 | Histone H2B                                                                                      | B4DR52   |      |      | 1.05 | 1.05 |      | 12 | 47   | 4.7E-159 |
| IPI00646304 | Cyclophilin B                                                                                    | P23284   | 0.96 | 1.07 | 1.13 | 1.05 | 0.09 | 19 | 65.7 | 0        |

|             |                                                                                                               |          |      |      |      |      |      |    |      |          |
|-------------|---------------------------------------------------------------------------------------------------------------|----------|------|------|------|------|------|----|------|----------|
| IPI00646350 | Putative uncharacterized protein NAE1                                                                         | A6NCK0   | 1.05 | 1.03 | 1.01 | 1.03 | 0.02 | 14 | 28.5 | 8.9E-142 |
| IPI00646361 | 214 kDa nucleoporin                                                                                           | P35658-5 | 1.19 | 1.14 | 0.83 | 1.05 | 0.20 | 10 | 8.9  | 7.2E-171 |
| IPI00646377 | eIF-4-gamma II                                                                                                | O43432-1 | 0.89 | 0.85 | 0.69 | 0.81 | 0.11 | 9  | 5.6  | 1.69E-58 |
| IPI00646493 | Alpha-coat protein                                                                                            | P53621-2 | 0.89 |      | 0.95 | 0.92 | 0.04 | 42 | 39.6 | 0        |
| IPI00646500 | Replication factor A protein 2                                                                                | P15927-3 | 1.26 | 1.22 | 1.11 | 1.20 | 0.08 | 6  | 22.9 | 2.09E-43 |
| IPI00646512 | cDNA FLJ77317, highly similar to Homo sapiens retinoblastoma binding protein 7 (RBBP7), mRNA                  | A8K6A2   |      | 1.18 |      | 1.18 |      | 11 | 35.2 | 2.96E-93 |
| IPI00646556 | NADH dehydrogenase [ubiquinone] flavoprotein 2, mitochondrial                                                 | P19404   | 0.90 | 0.93 | 0.87 | 0.90 | 0.03 | 7  | 33.3 | 9.1E-161 |
| IPI00646689 | 14 kDa thioredoxin-related protein                                                                            | Q9BRA2   | 0.94 | 1.05 | 0.94 | 0.98 | 0.07 | 4  | 38.2 | 6.39E-40 |
| IPI00646748 | Tropomyosin 2 (Beta)                                                                                          | Q5TCU3   |      |      | 0.70 | 0.70 |      | 39 | 83.1 | 0        |
| IPI00646762 | Putative uncharacterized protein NUDT5                                                                        | A6NFX8   | 0.96 | 0.94 | 0.99 | 0.96 | 0.02 | 7  | 25.9 | 2.6E-138 |
| IPI00646779 | Tubulin beta-6 chain                                                                                          | Q9BUF5   | 1.09 | 1.01 | 1.18 | 1.09 | 0.09 | 24 | 62.4 | 0        |
| IPI00646811 | Zinc finger protein 185 variant 692                                                                           | B8K2M2   |      |      | 1.14 | 1.14 |      | 8  | 18.5 | 2.1E-41  |
| IPI00646857 | Metaxin-3                                                                                                     | Q5HYI7-1 |      | 1.08 |      | 1.08 |      | 2  | 6.4  | 4.24E-06 |
| IPI00646885 | p190-B                                                                                                        | Q13017-1 |      | 1.15 | 1.56 | 1.35 | 0.29 | 1  | 1    | 0.0013   |
| IPI00646899 | Putative uncharacterized protein RPL10                                                                        | C9J7T6   | 0.70 |      |      | 0.70 |      | 13 | 60.7 | 0        |
| IPI00646917 | Cleavage and polyadenylation specificity factor 25 kDa subunit                                                | O43809   | 1.08 | 1.01 | 1.10 | 1.06 | 0.05 | 14 | 51.5 | 8.3E-99  |
| IPI00646954 | Protein enabled homolog                                                                                       | Q8N8S7-2 | 0.82 | 0.90 | 0.86 | 0.86 | 0.04 | 11 | 19.3 | 1.2E-106 |
| IPI00647067 | Neural polypyrimidine tract-binding protein                                                                   | Q9UKA9-2 | 1.22 |      |      | 1.22 |      | 2  | 7.1  | 1.35E-64 |
| IPI00647082 | TBC1 domain family, member 13                                                                                 | A7E2E7   | 1.17 | 1.58 | 1.07 | 1.27 | 0.27 | 4  | 15.8 | 4.28E-80 |
| IPI00647163 | Transcription elongation factor A protein-like 4                                                              | Q96EI5-2 | 1.80 |      | 1.26 | 1.53 | 0.38 | 1  | 5.9  | 2.73E-09 |
| IPI00647185 | Centrosomal protein 170kDa                                                                                    | B1ARM6   | 1.02 |      |      | 1.02 |      | 7  | 6.2  | 6.13E-31 |
| IPI00647217 | ATP-dependent helicase SKIV2L2                                                                                | P42285   | 0.86 | 1.02 | 0.89 | 0.92 | 0.08 | 17 | 20.2 | 5.09E-68 |
| IPI00647286 | C9orf88 variant protein                                                                                       | Q4LE55   | 1.05 | 1.23 | 1.10 | 1.12 | 0.09 | 22 | 44   | 2.1E-272 |
| IPI00647389 | EH domain-binding mitotic phosphoprotein                                                                      | Q9Y6I3-2 | 1.93 | 1.13 | 1.05 | 1.37 | 0.49 | 8  | 22.8 | 1.8E-192 |
| IPI00647400 | Putative uncharacterized protein RNPEP                                                                        | A6NKB8   | 1.27 |      |      | 1.27 |      | 18 | 38.6 | 3E-186   |
| IPI00647491 | Mitochondrial ribonuclease P protein 3                                                                        | O15091-1 |      |      | 0.98 | 0.98 |      | 1  | 2.4  | 6.79E-33 |
| IPI00647650 | cDNA FLJ35809 fis, clone TESTI2006016, highly similar to Eukaryotic translation initiation factor 3 subunit 3 | B3KS98   | 0.82 | 1.06 | 0.97 | 0.95 | 0.12 | 10 | 32.5 | 3.6E-236 |

|             |                                                                                                               |          |      |      |      |      |      |    |      |          |
|-------------|---------------------------------------------------------------------------------------------------------------|----------|------|------|------|------|------|----|------|----------|
| IPI00647655 | DNA polymerase                                                                                                | A6NMQ1   | 1.20 | 0.78 | 0.96 | 0.98 | 0.21 | 6  | 5.1  | 1.93E-36 |
| IPI00647762 | TCF3 protein                                                                                                  | Q2TB39   |      | 1.17 | 0.94 | 1.06 | 0.16 | 3  | 4.9  | 9.34E-13 |
| IPI00647837 | cDNA FLJ61310, highly similar to Zinc finger protein 185                                                      | B4DLE9   | 1.18 |      |      | 1.18 |      | 6  | 16.4 | 4.41E-56 |
| IPI00647892 | Discs large homolog 7                                                                                         | Q15398-2 | 0.89 | 1.38 | 1.04 | 1.10 | 0.25 | 6  | 12.9 | 4.06E-76 |
| IPI00647915 | SM22-alpha homolog                                                                                            | P37802   | 1.04 | 0.94 | 1.00 | 0.99 | 0.05 | 21 | 75.9 | 0        |
| IPI00651738 | 1,2-dihydroxy-3-keto-5-methylthiopentene dioxygenase                                                          | Q9BV57-1 | 1.25 | 1.99 | 1.88 | 1.71 | 0.40 | 6  | 39.1 | 1.44E-25 |
| IPI00654555 | Nucleolar protein 1                                                                                           | P46087-1 | 0.89 | 0.81 | 0.83 | 0.84 | 0.04 | 21 | 29.7 | 0        |
| IPI00654582 | Toll interacting protein variant                                                                              | Q59FB9   | 1.04 | 1.48 | 1.43 | 1.32 | 0.24 | 4  | 10.8 | 2.28E-15 |
| IPI00654605 | Arginine/proline-rich coiled-coil domain-containing protein 1                                                 | Q3KQU3-1 | 1.04 | 1.16 | 0.99 | 1.07 | 0.09 | 20 | 26.5 | 7.3E-141 |
| IPI00654777 | cDNA FLJ36192 fis, clone TESTI2027450, highly similar to Eukaryotic translation initiation factor 3 subunit 5 | B3KSH1   | 0.81 | 0.85 | 0.82 | 0.82 | 0.02 | 9  | 26.6 | 3.4E-176 |
| IPI00654820 | ATP synthase subunit a                                                                                        | P00846   | 0.92 |      | 1.03 | 0.98 | 0.08 | 1  | 4.2  | 4.32E-05 |
| IPI00654843 | Eukaryotic translation initiation factor 2B, subunit 4 delta, 67kDa, isoform CRA_e                            | Q53RY7   |      |      | 0.95 | 0.95 |      | 6  | 14.2 | 1.7E-106 |
| IPI00655631 | DNA polymerase                                                                                                | Q308M6   | 0.92 |      | 1.01 | 0.97 | 0.06 | 16 | 19.2 | 8.8E-112 |
| IPI00655650 | 40S ribosomal protein S26                                                                                     | P62854   | 0.83 | 0.97 | 0.91 | 0.90 | 0.07 | 2  | 20.9 | 5.33E-48 |
| IPI00655704 | cDNA FLJ53961, highly similar to Pyruvate dehydrogenase (lipoamide) kinase isozyme 1 (EC 2.7.11.2)            | B7Z937   | 1.21 |      |      | 1.21 |      | 3  | 8.6  | 2.38E-13 |
| IPI00656021 | Vacuolar protein sorting-associated protein 53 homolog                                                        | Q5VIR6-1 | 1.00 | 1.36 | 1.19 | 1.19 | 0.18 | 2  | 4.3  | 7.72E-60 |
| IPI00657648 | Mammalian ependymin-related protein 1                                                                         | Q9UM22-2 | 0.92 | 1.14 | 1.42 | 1.16 | 0.25 | 3  | 8.7  | 1.9E-40  |
| IPI00657692 | cDNA FLJ39535 fis, clone PUAEN2005502, highly similar to Goodpasture antigen-binding protein (EC 2.7.11.9)    | B3KUB7   |      | 1.40 |      | 1.40 |      | 4  | 7.7  | 8.71E-17 |
| IPI00657700 | Putative uncharacterized protein GART                                                                         | C9JKQ7   | 0.97 | 1.27 |      | 1.12 | 0.21 | 6  | 63   | 1.05E-28 |
| IPI00657752 | Putative uncharacterized protein CD81                                                                         | A6NMMH8  | 2.06 | 1.52 | 1.25 | 1.61 | 0.42 | 3  | 21.5 | 0        |
| IPI00657805 | 5-3 exoribonuclease 1                                                                                         | Q8IZH2-1 | 1.10 |      |      | 1.10 |      | 3  | 2.5  | 0.000174 |
| IPI00657888 | GDP-mannose pyrophosphorylase A                                                                               | Q96IJ6-2 | 1.03 | 1.11 | 1.10 | 1.08 | 0.05 | 9  | 26.2 | 3E-121   |
| IPI00657953 | PTPRF-interacting protein                                                                                     | O75962-1 |      |      | 0.72 | 0.72 |      | 5  | 2.2  | 1.74E-11 |
| IPI00657962 | 110 kDa centrosomal protein                                                                                   | Q7Z7A1-1 |      |      | 0.95 | 0.95 |      | 4  | 1.2  | 0.016477 |

|             |                                                   |          |      |      |      |      |      |    |      |          |
|-------------|---------------------------------------------------|----------|------|------|------|------|------|----|------|----------|
| IPI00658000 | IGF-II mRNA-binding protein 3                     | O00425-1 | 0.98 | 1.17 | 1.11 | 1.09 | 0.09 | 18 | 36.3 | 0        |
| IPI00658023 | Protein-tyrosine phosphatase 1D                   | Q06124-1 | 0.93 | 1.06 | 1.01 | 1.00 | 0.07 | 15 | 32   | 0        |
| IPI00658115 | Putative uncharacterized protein C2orf43          | B5MDU6   | 0.80 | 0.98 |      | 0.89 | 0.13 | 2  | 6.5  | 9.86E-82 |
| IPI00658145 | HEAT repeat-containing protein C7orf27            | Q6PJG6-1 |      |      | 0.84 | 0.84 |      | 3  | 5.6  | 1.08E-06 |
| IPI00658155 | 28S ribosomal protein S34, mitochondrial          | P82930   | 1.04 | 0.83 | 0.88 | 0.92 | 0.11 | 8  | 41.8 | 2.61E-46 |
| IPI00658210 | p80                                               | Q8TAF3-1 |      | 1.26 | 1.27 | 1.26 | 0.00 | 4  | 7.2  | 1.45E-53 |
| IPI00718888 | Phosphoribosyl pyrophosphate synthase II          | P11908-2 | 1.02 | 1.10 | 1.02 | 1.04 | 0.05 | 12 | 45.5 | 1.6E-140 |
| IPI00719040 | Uncharacterized protein C1orf77                   | Q9Y3Y2-3 | 1.18 | 1.16 | 1.22 | 1.18 | 0.03 | 4  | 20.9 | 1E-199   |
| IPI00719051 | Exocyst complex component 5                       | O00471   | 0.82 | 1.17 | 1.14 | 1.05 | 0.20 | 6  | 10   | 4.48E-11 |
| IPI00719079 | Parkinson disease 7 domain-containing protein 1   | Q8NB37-2 | 1.05 | 1.30 | 1.50 | 1.28 | 0.23 | 3  | 15.2 | 1.4E-21  |
| IPI00719178 | ATP-binding cassette sub-family C member 1        | P33527-9 | 1.38 | 0.82 | 1.11 | 1.10 | 0.28 | 2  | 2    | 6.1E-30  |
| IPI00719210 | HAUS augmin-like complex subunit 6                | Q7Z4H7-1 | 0.92 | 1.21 | 0.95 | 1.03 | 0.16 | 7  | 11.1 | 2.63E-36 |
| IPI00719285 | Putative uncharacterized protein CIT              | A8MWQ3   | 1.28 | 1.30 | 1.24 | 1.28 | 0.03 | 5  | 3.3  | 1.54E-79 |
| IPI00719622 | 40S ribosomal protein S28                         | P62857   | 0.75 | 0.85 | 0.77 | 0.79 | 0.06 | 6  | 56.5 | 2.7E-134 |
| IPI00719680 | Adapter-related protein complex 3 subunit delta-1 | O14617-5 | 1.03 | 0.88 | 1.08 | 0.99 | 0.10 | 12 | 15.7 | 6.7E-154 |
| IPI00719725 | SAPS domain family member 3                       | Q5H9R7-5 | 0.84 | 0.93 |      | 0.89 | 0.06 | 8  | 14.6 | 1.5E-136 |
| IPI00719752 | eIF3 p110                                         | P55884-2 | 0.90 | 0.86 | 0.93 | 0.89 | 0.04 | 25 | 38   | 0        |
| IPI00719821 | SAPS domain family member 3                       | Q5H9R7-1 |      |      | 0.89 | 0.89 |      | 9  | 15.2 | 9.23E-62 |
| IPI00735288 | Non-homologous end-joining factor 1               | Q9H9Q4-2 |      | 0.94 | 1.09 | 1.02 | 0.11 | 2  | 12   | 5.36E-12 |
| IPI00736813 | Protein YIF1B                                     | Q5BJH7-1 | 0.89 | 0.70 | 1.03 | 0.87 | 0.17 | 2  | 12.1 | 6.14E-45 |
| IPI00737251 | Interferon regulatory factor 3 nirs variant 1     | Q5FBY4   |      | 1.17 | 1.03 | 1.10 | 0.09 | 3  | 10   | 4.32E-21 |
| IPI00739099 | Collagen alpha-2(V) chain                         | P05997   | 2.36 | 1.13 | 1.47 | 1.65 | 0.64 | 9  | 10.5 | 2.7E-142 |
| IPI00739117 | BAT2 domain-containing protein 1                  | Q9Y520-4 | 1.09 | 0.82 |      | 0.96 | 0.20 | 16 | 8    | 1.59E-64 |
| IPI00739940 | ALL1-fused gene from chromosome 4p12 protein      | O94915-1 | 0.84 | 1.08 |      | 0.96 | 0.17 | 4  | 1.6  | 2.84E-21 |
| IPI00740545 | POTE ankyrin domain family, member I              |          |      | 0.07 | 0.22 | 0.15 | 0.11 | 10 | 9.6  | 3.61E-93 |
| IPI00741970 | Zinidin variant                                   | Q59GV6   | 1.52 | 1.17 | 0.59 | 1.09 | 0.47 | 5  | 8.2  | 1.31E-08 |
| IPI00742124 | UBX domain-containing protein 7                   | O94888   | 1.09 | 1.20 | 1.15 | 1.14 | 0.06 | 7  | 18.2 | 5.7E-103 |
| IPI00742670 | Aromatic esterase 2                               | Q15165-2 | 1.08 |      |      | 1.08 |      | 2  | 6.7  | 2.08E-78 |
| IPI00742682 | Nucleoprotein TPR                                 | P12270   | 1.13 | 0.96 | 1.00 | 1.03 | 0.09 | 53 | 27.7 | 0        |

|             |                                                                                                                           |          |      |      |      |      |      |    |      |          |
|-------------|---------------------------------------------------------------------------------------------------------------------------|----------|------|------|------|------|------|----|------|----------|
| IPI00742743 | Tumor suppressor p53-binding protein 1                                                                                    | Q12888-2 | 1.12 | 0.97 | 0.98 | 1.03 | 0.08 | 12 | 10.3 | 3.49E-97 |
| IPI00742943 | Nucleoporin Nup43                                                                                                         | Q8NFH3   | 0.86 | 1.16 | 0.85 | 0.96 | 0.18 | 3  | 10.8 | 1.32E-83 |
| IPI00742996 | RING finger protein 214                                                                                                   | Q8ND24   | 1.02 | 1.24 |      | 1.13 | 0.16 | 3  | 7.4  | 4.07E-09 |
| IPI00743284 | 5-methyltetrahydrofolate--homocysteine methyltransferase                                                                  | Q99707   | 0.72 | 0.80 | 0.84 | 0.79 | 0.06 | 6  | 5.7  | 1E-54    |
| IPI00743293 | Neuroendocrine-specific protein-like 2                                                                                    | O95197-1 | 1.02 | 1.20 | 1.61 | 1.28 | 0.30 | 3  | 2.6  | 1.26E-05 |
| IPI00743429 | cDNA FLJ58962, moderately similar to Mus musculus a disintegrin and metallopeptidase domain 3 (cyritlestin) (Adam3), mRNA | B4DY53   |      |      | 0.92 | 0.92 |      | 1  | 6.8  | 0.015364 |
| IPI00743503 | Aw-34                                                                                                                     | P30453   |      | 1.24 |      | 1.24 |      | 10 | 35.6 | 1.5E-193 |
| IPI00743594 | cDNA FLJ57190, highly similar to Actin-binding protein anillin                                                            | B4DSL6   | 0.62 | 1.12 | 1.09 | 0.94 | 0.28 | 18 | 21.5 | 4.7E-151 |
| IPI00743663 | E3 ubiquitin-protein ligase TRAF6                                                                                         | Q9Y4K3   |      | 1.95 | 1.23 | 1.59 | 0.51 | 2  | 4.4  | 2.31E-10 |
| IPI00743696 | Arresten                                                                                                                  | P02462-1 |      |      | 1.17 | 1.17 |      | 2  | 2.4  | 0.000335 |
| IPI00743772 | COMM domain-containing protein 7                                                                                          | Q86VX2-1 | 1.08 |      | 0.85 | 0.97 | 0.16 | 2  | 13.5 | 3.36E-19 |
| IPI00743862 | Proteasomal ATPase-associated factor 1                                                                                    | Q9BRP4-1 |      | 1.05 | 1.16 | 1.11 | 0.08 | 3  | 9.4  | 3.6E-13  |
| IPI00743871 | Integrator complex subunit 7                                                                                              | Q9NVH2-1 |      | 0.88 | 1.11 | 1.00 | 0.16 | 2  | 3    | 4E-111   |
| IPI00743879 | Kinesin light chain 4                                                                                                     | Q9NSK0-3 | 1.27 |      |      | 1.27 |      | 4  | 8.8  | 6.14E-10 |
| IPI00743931 | Golgi phosphoprotein 6                                                                                                    | Q9H8Y8-2 | 1.09 | 1.00 | 0.97 | 1.02 | 0.06 | 10 | 24.4 | 1.3E-177 |
| IPI00744015 | Cytoplasmic dynein 1 intermediate chain 2                                                                                 | Q13409-1 | 0.98 | 1.02 |      | 1.00 | 0.03 | 11 | 16.6 | 1.7E-129 |
| IPI00744139 | HSPA12B protein                                                                                                           | Q5BKZ8   | 1.19 | 1.30 | 1.26 | 1.25 | 0.05 | 10 | 17.8 | 8.18E-32 |
| IPI00744211 | eIF4E-like protein 4E-LP                                                                                                  | O60573   | 1.02 | 1.25 | 1.02 | 1.10 | 0.14 | 5  | 27.3 | 1.18E-30 |
| IPI00744319 | Protein PRRC1                                                                                                             | Q96M27-2 | 1.06 | 1.17 | 1.04 | 1.09 | 0.07 | 4  | 9.9  | 2.82E-81 |
| IPI00744637 | FYVE-finger protein EIP1                                                                                                  | Q96T51-1 | 1.36 | 1.07 | 1.11 | 1.18 | 0.16 | 6  | 13.3 | 1.04E-90 |
| IPI00744692 | Transaldolase                                                                                                             | P37837   | 1.08 | 1.04 | 1.13 | 1.08 | 0.04 | 23 | 47.8 | 1.7E-251 |
| IPI00744702 | CIN85/CD2AP family-binding protein                                                                                        | Q96EY5-1 | 1.19 | 1.51 | 1.08 | 1.26 | 0.22 | 2  | 12.1 | 3.01E-70 |
| IPI00744711 | 3-5 RNA exonuclease OLD35                                                                                                 | Q8TCS8   | 1.15 | 0.75 | 0.78 | 0.89 | 0.22 | 11 | 14.4 | 8.69E-50 |
| IPI00744834 | Syntaxin-5                                                                                                                | Q13190-1 | 0.93 | 1.18 | 0.93 | 1.01 | 0.15 | 4  | 18.9 | 8.8E-165 |
| IPI00744851 | cDNA FLJ54188, moderately similar to High mobility group protein HMG-I/HMG-Y                                              | B4DWA0   |      | 1.01 |      | 1.01 |      | 3  | 12.5 | 2.12E-16 |
| IPI00744858 | Pre-mRNA-splicing factor ISY1 homolog                                                                                     | Q9ULR0-1 | 1.17 | 1.06 | 1.09 | 1.11 | 0.06 | 5  | 19.6 | 9.2E-163 |
| IPI00745105 | UPF0585 protein C16orf13                                                                                                  | Q96S19-1 | 1.18 | 1.27 | 1.22 | 1.22 | 0.04 | 3  | 16.2 | 1.11E-37 |

|             |                                                                                                   |          |      |      |      |      |      |    |      |          |
|-------------|---------------------------------------------------------------------------------------------------|----------|------|------|------|------|------|----|------|----------|
| IPI00745125 | Acyl-coenzyme A:cholesterol acyltransferase 1                                                     | P35610   |      |      | 0.82 | 0.82 |      | 3  | 6.9  | 3.35E-06 |
| IPI00745406 | Cancer/testis antigen 89                                                                          | O60271-1 | 0.91 |      | 1.02 | 0.96 | 0.08 | 22 | 21.3 | 0        |
| IPI00745433 | Eukaryotic translation initiation factor 2C 2                                                     | Q9UKV8-1 |      |      | 1.04 | 1.04 |      | 3  | 5.7  | 1.69E-09 |
| IPI00745568 | Putative MAPK-activating protein PM10                                                             | O75663-1 | 0.91 | 1.23 | 1.14 | 1.09 | 0.16 | 9  | 34.2 | 1.68E-47 |
| IPI00745613 | Exosome complex exonuclease RRP41                                                                 | Q9NPD3   | 0.97 | 0.89 | 1.00 | 0.95 | 0.06 | 5  | 24.9 | 4.11E-62 |
| IPI00745792 | NmrA-like family domain-containing protein 1                                                      | Q9HBL8   |      | 1.09 |      | 1.09 |      | 2  | 6.3  | 1.18E-09 |
| IPI00745793 | G2/mitotic-specific cyclin-B1                                                                     | P14635   | 0.71 | 1.24 | 1.04 | 1.00 | 0.26 | 7  | 17.6 | 1.4E-142 |
| IPI00745868 | 35-alpha calcimedlin                                                                              | A6NLK4   | 0.94 | 1.21 | 1.12 | 1.09 | 0.14 | 13 | 41.5 | 6.1E-188 |
| IPI00745921 | RING finger protein 126                                                                           | Q9BV68-1 | 0.99 |      | 0.95 | 0.97 | 0.03 | 3  | 14.1 | 0.002123 |
| IPI00746004 | 40S ribosomal protein S27-like                                                                    | Q71UM5   | 0.84 | 1.07 | 1.02 | 0.98 | 0.12 | 5  | 40.5 | 3.36E-35 |
| IPI00746165 | Actin-interacting protein 1                                                                       | O75083-1 | 0.89 | 1.02 | 1.05 | 0.98 | 0.08 | 30 | 56.4 | 0        |
| IPI00746221 | Protein FAM195B                                                                                   | C9JLW8   | 1.08 | 0.96 | 0.95 | 0.99 | 0.07 | 3  | 41.2 | 4.92E-21 |
| IPI00746351 | Exosome complex exonuclease RRP44                                                                 | Q9Y2L1-1 | 0.93 | 0.96 | 1.03 | 0.97 | 0.05 | 8  | 11.4 | 2.8E-105 |
| IPI00746360 | Protein Ric-8A                                                                                    | Q9NPQ8-1 |      | 0.97 | 0.94 | 0.95 | 0.02 | 13 | 28.7 | 6.5E-285 |
| IPI00746412 | CTD-associated SR protein 11                                                                      | Q99590-1 |      |      | 1.06 | 1.06 |      | 2  | 1.4  | 0.000663 |
| IPI00746655 | Extended synaptotagmin-1                                                                          | Q9BSJ8-2 | 1.08 | 1.10 | 1.15 | 1.11 | 0.04 | 24 | 26.9 | 0        |
| IPI00746777 | Alcohol dehydrogenase 5                                                                           | P11766   | 1.00 | 1.07 | 1.08 | 1.05 | 0.05 | 14 | 35.3 | 1.1E-213 |
| IPI00746934 | 600 kDa retinoblastoma protein-associated factor                                                  | Q5T4S7-2 | 1.08 | 0.86 | 0.93 | 0.96 | 0.11 | 28 | 8.3  | 2E-243   |
| IPI00747053 | Basic transcription factor 2 89 kDa subunit                                                       | P19447   |      | 1.26 |      | 1.26 |      | 1  | 1.5  | 0.002257 |
| IPI00747077 | RUN and TBC1 domain-containing protein 2                                                          | Q2NKQ1-1 | 7.68 |      |      | 7.68 |      | 2  | 1.5  | 0.023056 |
| IPI00747319 | HBV preS1-transactivated protein 1                                                                | Q6DTV5   |      | 1.16 |      | 1.16 |      | 2  | 5.2  | 4.85E-17 |
| IPI00747478 | Methylmalonic aciduria and homocystinuria type D protein, mitochondrial                           | A6NHZ2   | 0.61 |      |      | 0.61 |      | 2  | 9.1  | 1.9E-08  |
| IPI00747764 | Importin subunit alpha-7                                                                          | O60684   | 0.87 | 1.12 | 1.11 | 1.03 | 0.14 | 13 | 25.7 | 5.7E-271 |
| IPI00747787 | Condensin-2 complex subunit D3                                                                    | P42695   |      |      | 0.50 | 0.50 |      | 2  | 2.5  | 4.66E-07 |
| IPI00747810 | FSCN1 protein                                                                                     | Q96IH1   | 0.84 | 1.05 | 1.03 | 0.97 | 0.12 | 25 | 55   | 0        |
| IPI00747849 | Sodium/potassium-dependent ATPase subunit beta-1                                                  | P05026-1 | 0.88 | 1.04 | 0.94 | 0.96 | 0.08 | 4  | 22.1 | 2.83E-23 |
| IPI00748093 | Five-pass transmembrane protein localizing in the Golgi apparatus and the endoplasmic reticulum 5 | Q969M3-3 | 0.54 |      | 1.12 | 0.83 | 0.41 | 1  | 4.5  | 2.33E-15 |
| IPI00748145 | Adenylate cyclase-inhibiting G alpha protein                                                      | P04899-1 | 1.14 | 1.42 | 1.40 | 1.32 | 0.16 | 18 | 59.2 | 0        |



|             |                                              |          |      |      |      |      |      |    |      |          |
|-------------|----------------------------------------------|----------|------|------|------|------|------|----|------|----------|
| IPI00748151 | Endoplasmic reticulum lectin 1               | Q96DZ1-1 | 1.26 | 1.17 | 1.44 | 1.29 | 0.14 | 5  | 12   | 3.73E-23 |
| IPI00748244 | Cancer/testis antigen 89                     | O60271-7 | 1.38 | 0.91 | 0.94 | 1.08 | 0.26 | 17 | 45.9 | 0        |
| IPI00748256 | Putative uncharacterized protein PSME1       | A6NJG9   | 1.31 |      |      | 1.31 |      | 12 | 47.6 | 2.1E-164 |
| IPI00748360 | Uncharacterized protein KIAA1797             | Q5VW36   | 0.79 | 0.78 | 0.84 | 0.80 | 0.03 | 3  | 2.9  | 2.8E-08  |
| IPI00748472 | Protein KIAA0196 variant                     | Q53EL1   | 1.10 | 1.28 | 1.12 | 1.17 | 0.10 | 8  | 8.5  | 5.14E-83 |
| IPI00748490 | cDNA FLJ36765 fis, clone 3NB691000191        | B3KSP9   | 0.77 | 0.73 | 0.95 | 0.82 | 0.12 | 5  | 12.8 | 2.69E-35 |
| IPI00748502 | Cartilage-associated protein                 | O75718   | 1.03 | 1.22 | 1.24 | 1.16 | 0.11 | 9  | 24.9 | 9.8E-113 |
| IPI00748700 | DNA replication complex GINS protein PSF3    | Q9BRX5-1 | 1.23 | 1.01 | 1.05 | 1.10 | 0.12 | 10 | 49.1 | 0        |
| IPI00748807 | 160 kDa nucleoporin                          | Q12769-1 | 0.95 | 1.09 | 1.14 | 1.06 | 0.10 | 10 | 9.4  | 2.05E-87 |
| IPI00748891 | Protein FAM177A1                             | Q8N128-2 | 0.73 |      | 1.02 | 0.88 | 0.20 | 2  | 9.3  | 0.000103 |
| IPI00749013 | Ubiquitin carrier protein D3                 | P61077-2 |      | 1.01 | 0.97 | 0.99 | 0.03 | 2  | 14.2 | 0.00013  |
| IPI00749454 | Cell migration-inducing gene 2 protein       | Q14699   | 0.94 | 1.01 | 0.64 | 0.86 | 0.20 | 5  | 8.8  | 1.7E-119 |
| IPI00759481 | HMG2e                                        | Q1M183   |      | 1.12 |      | 1.12 |      | 2  | 24.5 | 3.32E-19 |
| IPI00759532 | Ankycorbin                                   | Q9P0K7-1 |      |      | 0.99 | 0.99 |      | 10 | 13.3 | 3.81E-63 |
| IPI00759542 | Connectin                                    | Q8WZ42-8 |      | 1.02 | 1.19 | 1.11 | 0.12 | 6  | 0.1  | 0.000595 |
| IPI00759562 | Alkylated DNA repair protein alkB homolog 5  | Q6P6C2-1 | 1.10 |      | 1.30 | 1.20 | 0.14 | 1  | 6.3  | 3.1E-33  |
| IPI00759601 | Nuclear distribution protein nudE homolog 1  | Q9NXR1-1 | 1.32 | 1.37 |      | 1.34 | 0.03 | 4  | 14.5 | 1.29E-39 |
| IPI00759776 | Alpha actin 1                                | A1L0V1   | 0.73 |      |      | 0.73 |      | 67 | 71.2 | 0        |
| IPI00759799 | HBeAg-binding protein 2 binding protein A    | Q1HDL3   |      |      | 1.22 | 1.22 |      | 1  | 3.3  | 0.002028 |
| IPI00760554 | Aw-69                                        | P10316   |      | 1.19 | 1.17 | 1.18 | 0.01 | 11 | 41.1 | 4.9E-266 |
| IPI00760715 | Calpain inhibitor                            | P20810-5 |      | 1.44 | 1.24 | 1.34 | 0.15 | 23 | 54.4 | 0        |
| IPI00760837 | Putative uncharacterized protein FAM98B      | A8MUW5   | 1.14 | 1.14 | 1.15 | 1.14 | 0.01 | 5  | 15   | 4.73E-89 |
| IPI00760846 | Molecule associated with JAK3 N-terminus     | Q92614-1 | 1.02 | 0.98 | 1.49 | 1.16 | 0.28 | 4  | 3.1  | 3.02E-46 |
| IPI00760940 | Hepatopoietin PCn127                         | Q1AHP8   |      |      | 1.07 | 1.07 |      | 6  | 22.9 | 2.2E-241 |
| IPI00761017 | Androgen receptor coactivator 55 kDa protein | O43294-1 | 0.56 | 0.95 | 1.03 | 0.85 | 0.25 | 10 | 25.8 | 1.33E-84 |
| IPI00761082 | Centromere protein V                         | Q7Z7K6-1 | 1.09 | 0.89 | 0.98 | 0.98 | 0.10 | 4  | 25.1 | 1.97E-73 |
| IPI00761160 | Calpain inhibitor                            | P20810-6 | 1.70 |      |      | 1.70 |      | 23 | 44.1 | 0        |
| IPI00782950 | nPKC-D1                                      | Q15139   | 0.69 | 1.17 | 1.03 | 0.96 | 0.25 | 3  | 4    | 4.07E-14 |
| IPI00782965 | Huntingtin-interacting protein 1             | O00291   | 1.07 | 0.86 | 1.02 | 0.98 | 0.11 | 5  | 6.8  | 1.61E-67 |
| IPI00782974 | Protein ELG                                  | Q53F19-1 |      | 1.02 | 1.04 | 1.03 | 0.01 | 2  | 4.2  | 7.49E-17 |

|             |                                                                  |          |      |      |      |      |      |    |      |          |
|-------------|------------------------------------------------------------------|----------|------|------|------|------|------|----|------|----------|
| IPI00782992 | 300 kDa nuclear matrix antigen                                   | Q9UQ35-1 | 1.03 | 0.78 | 0.85 | 0.89 | 0.13 | 15 | 8.9  | 1.6E-86  |
| IPI00783001 | Methyltransferase 5 domain-containing protein 1                  | A6NJ78-1 | 0.87 |      |      | 0.87 |      | 3  | 12   | 3.09E-24 |
| IPI00783004 | 1-phosphatidylinositol-4,5-bisphosphate phosphodiesterase beta-4 | Q15147-4 | 0.65 | 0.12 |      | 0.39 | 0.37 | 2  | 2.8  | 7.42E-27 |
| IPI00783097 | Diadenosine tetraphosphate synthetase                            | P41250   | 0.81 | 0.95 | 0.97 | 0.91 | 0.09 | 27 | 42.2 | 0        |
| IPI00783118 | 5-nucleotidase domain-containing protein 2                       | Q9H857-2 | 1.10 | 1.43 | 1.13 | 1.22 | 0.18 | 3  | 6.5  | 9.33E-30 |
| IPI00783133 | Methyltransferase-like protein 14                                | Q9HCE5   |      |      | 1.26 | 1.26 |      | 2  | 8.1  | 2.23E-16 |
| IPI00783185 | Coiled-coil domain-containing protein 150                        | Q8NCX0-1 |      |      | 1.03 | 1.03 |      | 2  | 2.1  | 0.004029 |
| IPI00783271 | 130 kDa leucine-rich protein                                     | P42704   | 0.76 | 0.84 | 0.82 | 0.81 | 0.04 | 66 | 51.2 | 0        |
| IPI00783298 | Fragile X mental retardation 1 protein                           | Q06787-7 |      | 1.33 |      | 1.33 |      | 7  | 12.5 | 8.4E-107 |
| IPI00783302 | Pentatricopeptide repeat-containing protein 3, mitochondrial     | Q96EY7-1 |      |      | 0.97 | 0.97 |      | 3  | 7.4  | 7E-19    |
| IPI00783305 | BUB1A                                                            | O43683   | 0.93 |      | 0.88 | 0.90 | 0.04 | 2  | 3.7  | 3.56E-19 |
| IPI00783313 | Glycogen phosphorylase, liver form                               | P06737   | 0.98 | 1.04 | 1.02 | 1.01 | 0.03 | 35 | 43.4 | 7.3E-296 |
| IPI00783378 | Ubiquitin carrier protein O                                      | Q9C0C9   | 1.00 | 0.97 | 1.01 | 0.99 | 0.02 | 5  | 6.8  | 5.75E-16 |
| IPI00783497 | Nucleoside diphosphate-linked moiety X motif 16                  | Q96DE0   |      | 1.12 | 1.32 | 1.22 | 0.14 | 6  | 34.9 | 2.94E-55 |
| IPI00783559 | Exocyst complex component 2                                      | Q96KP1   | 1.07 | 1.24 | 1.29 | 1.20 | 0.12 | 2  | 2.8  | 1.9E-131 |
| IPI00783656 | 39S ribosomal protein L38, mitochondrial                         | Q96DV4   | 0.83 | 0.91 | 0.85 | 0.86 | 0.04 | 7  | 23.4 | 1.9E-21  |
| IPI00783781 | 205 kDa nucleoporin                                              | Q92621   | 0.85 | 1.13 | 0.92 | 0.97 | 0.14 | 7  | 5.5  | 9.36E-55 |
| IPI00783826 | Ryanodine receptor 1                                             | P21817-1 | 0.89 |      |      | 0.89 |      | 2  | 0.6  | 0.028228 |
| IPI00783835 | RING finger protein 160                                          | O94822   | 1.32 |      | 0.76 | 1.04 | 0.39 | 2  | 1.6  | 2.5E-117 |
| IPI00783872 | Caprin-1                                                         | Q14444-1 | 1.00 | 0.82 | 0.87 | 0.90 | 0.09 | 15 | 26.9 | 0        |
| IPI00783874 | Haloacid dehalogenase-like hydrolase domain-containing protein 2 | Q9H0R4-1 |      | 1.26 | 1.06 | 1.16 | 0.14 | 4  | 16.6 | 5.02E-33 |
| IPI00783895 | Uncharacterized protein KIAA0528                                 | Q86YS7-2 |      | 1.03 | 0.96 | 0.99 | 0.06 | 4  | 4.7  | 1.31E-20 |
| IPI00783902 | HEAT repeat-containing protein 5A                                | Q86XA9-1 |      |      | 1.00 | 1.00 |      | 3  | 3    | 0.000141 |
| IPI00783931 | Collagen alpha-1(XVIII) chain                                    | P39060-3 | 1.36 | 1.15 | 1.13 | 1.21 | 0.13 | 6  | 6.5  | 1.46E-57 |
| IPI00783982 | Coatomer subunit gamma                                           | Q9Y678   | 0.86 | 0.96 | 0.99 | 0.94 | 0.07 | 31 | 44.4 | 0        |
| IPI00784013 | Janus kinase 1                                                   | P23458   |      | 1.47 | 1.34 | 1.40 | 0.09 | 4  | 6.2  | 2.49E-14 |
| IPI00784020 | Ankyrin repeat domain-containing protein 17                      | O75179-1 | 1.14 | 1.12 | 0.90 | 1.05 | 0.13 | 10 | 5.3  | 7.6E-235 |
| IPI00784044 | 3-methylcrotonyl-CoA carboxylase 2                               | Q9HCC0-1 | 0.84 | 0.96 | 0.90 | 0.90 | 0.06 | 11 | 24.9 | 2.2E-137 |

|             |                                                                                                   |          |      |      |      |      |      |    |      |          |
|-------------|---------------------------------------------------------------------------------------------------|----------|------|------|------|------|------|----|------|----------|
| IPI00784090 | CCT-theta                                                                                         | P50990   | 0.79 | 0.93 | 0.90 | 0.87 | 0.07 | 40 | 67.9 | 0        |
| IPI00784107 | tRNA-dihydrouridine synthase 3-like                                                               | Q96G46-1 | 0.72 | 0.80 |      | 0.76 | 0.06 | 3  | 8    | 9.2E-116 |
| IPI00784119 | Protein XAP-3                                                                                     | Q15904   |      |      | 1.05 | 1.05 |      | 1  | 3.8  | 3.93E-40 |
| IPI00784154 | 60 kDa chaperonin                                                                                 | P10809   | 0.92 | 0.81 | 0.84 | 0.86 | 0.05 | 49 | 70.9 | 0        |
| IPI00784161 | Tat-cotransactivator 2 protein                                                                    | Q7KZ85-1 | 0.86 | 1.18 | 0.92 | 0.99 | 0.17 | 17 | 13.9 | 4.7E-209 |
| IPI00784224 | M-phase phosphoprotein homolog                                                                    | Q96KR1   | 0.83 | 1.05 | 1.06 | 0.98 | 0.13 | 10 | 13.8 | 0        |
| IPI00784233 | GRB10-interacting GYF protein 2                                                                   | Q6Y7W6-1 | 1.18 | 0.98 | 0.95 | 1.04 | 0.12 | 9  | 9.8  | 2.92E-80 |
| IPI00784366 | Adapter-related protein complex 2 beta subunit                                                    | P63010-2 | 1.00 | 1.11 | 1.16 | 1.09 | 0.08 | 36 | 38.4 | 0        |
| IPI00784376 | Mitochondrial 18 kDa protein                                                                      | Q9UDX5   | 1.14 | 0.86 | 0.85 | 0.95 | 0.16 | 5  | 28.3 | 1.51E-37 |
| IPI00784414 | Acute-phase response factor                                                                       | P40763-1 | 1.01 | 1.13 | 1.09 | 1.08 | 0.06 | 11 | 18.2 | 6.07E-72 |
| IPI00784614 | Ovarian/Breast septin epsilon                                                                     | Q96QF2   | 1.24 | 1.17 | 1.13 | 1.18 | 0.05 | 21 | 43.9 | 5.8E-132 |
| IPI00784739 | Uncharacterized protein C14orf43                                                                  | Q6PJG2   |      | 1.75 | 1.58 | 1.67 | 0.12 | 1  | 1.8  | 3.24E-11 |
| IPI00785110 | Bromodomain and PHD finger-containing transcription factor                                        | Q12830-1 |      | 1.04 |      | 1.04 |      | 2  | 1    | 2.13E-14 |
| IPI00787089 | Modulator of non-genomic activity of estrogen receptor                                            | Q8IZL8-2 | 0.99 | 0.94 | 0.93 | 0.95 | 0.03 | 8  | 9.5  | 5.4E-127 |
| IPI00787501 | cDNA FLJ56391, highly similar to Cysteine protease ATG4B (EC 3.4.22.-)                            | B4DZK0   | 0.79 | 1.23 | 1.07 | 1.03 | 0.22 | 2  | 6.9  | 7.8E-99  |
| IPI00787853 | Inositol monophosphatase 3                                                                        | Q9NX62   | 1.12 | 0.83 | 0.92 | 0.96 | 0.15 | 3  | 14.2 | 2.48E-53 |
| IPI00788747 | TIMP metalloproteinase inhibitor 2                                                                | P16035   |      | 1.56 |      | 1.56 |      | 6  | 28.9 | 8.92E-39 |
| IPI00788837 | cDNA FLJ54752, highly similar to Poly(rC)-binding protein 2                                       | B4DRD7   | 0.93 |      |      | 0.93 |      | 10 | 55.3 | 2.8E-274 |
| IPI00788879 | HCV non-structural protein 4A-transactivated protein 1                                            | Q9NUY8-1 |      | 1.27 | 1.06 | 1.16 | 0.15 | 6  | 10.9 | 1.3E-122 |
| IPI00788907 | Bcl-XL-binding protein v68                                                                        | Q96HS1-1 | 1.02 | 0.86 | 0.89 | 0.92 | 0.09 | 13 | 43.6 | 6.95E-33 |
| IPI00788925 | Branched-chain-amino-acid aminotransferase                                                        | Q53EW7   | 1.34 |      |      | 1.34 |      | 2  | 7.1  | 0.001796 |
| IPI00789041 | 140 kDa nuclear and cell adhesion-related phosphoprotein                                          | Q9H307-1 | 1.04 | 0.95 | 1.07 | 1.02 | 0.07 | 14 | 22.3 | 1.01E-85 |
| IPI00789101 | cDNA FLJ40895 fis, clone UTERU2002294, highly similar to Prostaglandin E synthase 3 (EC 5.3.99.3) | B3KUY2   | 1.09 | 1.06 | 1.03 | 1.06 | 0.03 | 7  | 34.5 | 2.2E-151 |
| IPI00789155 | Calumenin, isoform CRA_c                                                                          | B3KPG9   | 1.17 | 1.10 | 1.15 | 1.14 | 0.04 | 15 | 51.4 | 2.7E-225 |
| IPI00789455 | Katanin p60 ATPase-containing subunit A-like 1                                                    | Q9BW62   | 0.86 |      |      | 0.86 |      | 1  | 3.7  | 3.18E-15 |
| IPI00789551 | Putative uncharacterized protein MATR3                                                            | A8MXP9   | 1.02 | 1.07 | 1.07 | 1.05 | 0.03 | 42 | 47   | 0        |

|             |                                                                                                            |          |      |      |      |      |      |    |      |          |
|-------------|------------------------------------------------------------------------------------------------------------|----------|------|------|------|------|------|----|------|----------|
| IPI00789582 | Eukaryotic translation initiation factor 3, subunit D                                                      | B0QYA3   |      | 1.00 |      | 1.00 |      | 7  | 34.3 | 8.49E-42 |
| IPI00789737 | Cell proliferation-inducing gene 17 protein                                                                | Q5J8M3-1 | 0.88 | 1.00 | 1.14 | 1.01 | 0.13 | 4  | 20.3 | 1.95E-69 |
| IPI00789740 | Gem (Nuclear organelle) associated protein 4                                                               | Q8WUM5   | 0.98 |      |      | 0.98 |      | 2  | 2.3  | 0.00219  |
| IPI00789798 | Putative uncharacterized protein RAI1                                                                      | A8MTC3   |      |      | 1.14 | 1.14 |      | 2  | 1.4  | 1.5E-08  |
| IPI00789848 | Putative uncharacterized protein IVD                                                                       | C9JUI0   | 0.86 |      | 1.08 | 0.97 | 0.16 | 3  | 7.3  | 1.98E-12 |
| IPI00790107 | Protein SOLO                                                                                               | Q8TER5-1 | 1.17 | 1.04 |      | 1.11 | 0.09 | 3  | 2.8  | 4.66E-06 |
| IPI00790214 | Calcium-binding protein ERC-55                                                                             | Q14257   | 1.56 | 0.89 | 1.00 | 1.15 | 0.36 | 4  | 19.7 | 1.7E-186 |
| IPI00790230 | cDNA, FLJ94609                                                                                             | B2R9Y2   |      | 0.91 | 1.05 | 0.98 | 0.10 | 2  | 1.8  | 1.58E-06 |
| IPI00790292 | cDNA FLJ61100, highly similar to 39S ribosomal protein L45, mitochondrial                                  | B4DEF8   | 0.83 | 1.01 | 0.95 | 0.93 | 0.09 | 4  | 17.3 | 2.28E-30 |
| IPI00790342 | 60S ribosomal protein L6                                                                                   | B2R4K7   | 0.86 | 0.85 | 0.90 | 0.87 | 0.02 | 20 | 50.9 | 1.6E-238 |
| IPI00790441 | NCAPD2 protein                                                                                             | A0PJ76   |      | 1.33 |      | 1.33 |      | 7  | 27.2 | 3.31E-92 |
| IPI00790491 | Hepatitis C virus NS5A-transactivated protein 9                                                            | Q15004   |      | 1.31 |      | 1.31 |      | 1  | 16.4 | 2.69E-08 |
| IPI00790503 | Cellular myosin heavy chain, type B                                                                        | P35580-3 |      |      | 1.08 | 1.08 |      | 82 | 41.6 | 0        |
| IPI00790530 | 85 kDa nucleoporin                                                                                         | Q9BW27   | 1.04 | 1.02 | 1.08 | 1.05 | 0.03 | 6  | 12   | 4.98E-94 |
| IPI00790644 | cDNA FLJ52271, moderately similar to Ubiquinol-cytochrome c reductase complex 14 kDa protein (EC 1.10.2.2) | B7Z2R2   | 1.02 |      |      | 1.02 |      | 2  | 13   | 2.6E-07  |
| IPI00790739 | Aconitase 2, mitochondrial                                                                                 | A2A274   | 0.98 | 0.93 | 0.99 | 0.97 | 0.04 | 21 | 31.1 | 8.8E-290 |
| IPI00790743 | 60S ribosomal protein L36a-like                                                                            | Q969Q0   | 1.03 | 1.05 | 0.84 | 0.97 | 0.12 | 7  | 36.2 | 6.11E-39 |
| IPI00790757 | Dual specificity protein phosphatase 3                                                                     | P51452   | 0.90 | 1.25 | 1.06 | 1.07 | 0.18 | 7  | 42.4 | 0        |
| IPI00790974 | APG16-like 1                                                                                               | Q676U5-1 |      |      | 1.00 | 1.00 |      | 2  | 6.1  | 2.69E-15 |
| IPI00791026 | 56 kDa protein                                                                                             |          | 1.35 | 1.12 | 1.13 | 1.20 | 0.13 | 24 | 48.8 | 5.9E-279 |
| IPI00791060 | BRCA1-A complex subunit MERIT40                                                                            | Q9NWW8-1 | 1.10 | 1.27 | 1.05 | 1.14 | 0.12 | 3  | 11.7 | 4.7E-190 |
| IPI00791086 | Putative uncharacterized protein EIF3D                                                                     | A8MWD3   | 0.78 | 0.98 | 0.91 | 0.89 | 0.10 | 16 | 39.1 | 2E-241   |
| IPI00791117 | NA                                                                                                         |          |      | 1.02 | 0.75 | 0.89 | 0.19 | 13 | 48.7 | 1.2E-117 |
| IPI00791262 | Digestion subtraction 1                                                                                    | Q14197   | 0.97 | 0.84 | 0.94 | 0.92 | 0.07 | 5  | 29.1 | 5.53E-31 |
| IPI00791325 | HBV XAg-transactivated protein 5                                                                           | Q15397   | 0.76 | 0.98 | 0.97 | 0.90 | 0.12 | 7  | 10.5 | 3.17E-96 |
| IPI00791333 | Chromosome 20 open reading frame 4                                                                         | A2A2Q9   | 0.84 | 1.09 | 1.12 | 1.02 | 0.16 | 6  | 19.6 | 2.94E-92 |
| IPI00791509 | cDNA FLJ75002, highly similar to Homo sapiens, neural cell expressed, developmentally down-                | A8K1Z3   |      |      | 1.35 | 1.35 |      | 2  | 6.4  | 2.1E-156 |

|             |                                                                                   |          |      |      |      |      |      |    |      |          |
|-------------|-----------------------------------------------------------------------------------|----------|------|------|------|------|------|----|------|----------|
|             | regulated gene 1                                                                  |          |      |      |      |      |      |    |      |          |
| IPI00791711 | Nuclear receptor 2C2-associated protein                                           | Q86WQ0   | 1.12 | 1.09 | 0.99 | 1.07 | 0.07 | 3  | 28.1 | 4.73E-35 |
| IPI00791720 | Protein Smaug homolog 2                                                           | Q5PRF9   | 0.73 |      |      | 0.73 |      | 1  | 2.2  | 9.38E-30 |
| IPI00792065 | Putative uncharacterized protein TOR1AIP1                                         | A8MUM5   | 0.98 |      | 1.10 | 1.04 | 0.08 | 12 | 29.1 | 1E-138   |
| IPI00792109 | CCDC43 protein                                                                    | Q86WV7   | 1.02 | 1.01 | 1.04 | 1.02 | 0.01 | 6  | 20.3 | 7.41E-37 |
| IPI00792186 | ATP-binding cassette sub-family F member 1                                        | A0PJ72   |      | 1.51 | 1.23 | 1.37 | 0.20 | 12 | 34   | 1.7E-214 |
| IPI00792312 | Integrator complex subunit 3                                                      | Q68E01-1 | 1.07 | 1.09 | 0.97 | 1.04 | 0.06 | 9  | 15.2 | 8.73E-30 |
| IPI00792352 | Putative uncharacterized protein RAN                                              | B5MDF5   | 0.93 | 0.97 | 1.00 | 0.97 | 0.04 | 13 | 36.4 | 4.9E-150 |
| IPI00792422 | WASH complex subunit FAM21A                                                       | Q641Q2-1 | 1.51 | 1.35 |      | 1.43 | 0.11 | 8  | 9.5  | 1.6E-147 |
| IPI00792423 | Activator-recruited cofactor 100 kDa component                                    | O75448   |      |      | 0.75 | 0.75 |      | 2  | 2.8  | 9.31E-07 |
| IPI00792788 | Dedicator of cytokinesis protein 5                                                | Q9H7D0-1 | 1.08 | 1.00 | 0.91 | 1.00 | 0.08 | 10 | 8.4  | 9.02E-48 |
| IPI00792789 | Putative uncharacterized protein THOC7                                            | B5MDZ2   | 1.11 | 0.86 | 0.77 | 0.91 | 0.18 | 5  | 24   | 2.5E-100 |
| IPI00792837 | Zinc finger protein 207 variant                                                   | Q59G94   | 0.97 | 0.98 | 0.98 | 0.98 | 0.01 | 5  | 8.3  | 5.9E-77  |
| IPI00793111 | Rho GTPase-activating protein SYDE1                                               | Q6ZW31-1 | 0.81 |      | 1.14 | 0.97 | 0.24 | 2  | 3.8  | 9.66E-05 |
| IPI00793132 | cDNA FLJ78285, highly similar to Homo sapiens gasdermin domain containing 1, mRNA | A8K702   | 1.16 | 1.10 |      | 1.13 | 0.04 | 3  | 10.2 | 1.81E-15 |
| IPI00793155 | Putative uncharacterized protein RAB34                                            | C9JI96   | 0.96 | 1.12 | 1.09 | 1.06 | 0.08 | 8  | 25.6 | 2.6E-172 |
| IPI00793181 | Selenoprotein S                                                                   | Q9BQE4   | 0.44 |      | 0.75 | 0.59 | 0.22 | 3  | 17.2 | 3.49E-14 |
| IPI00793199 | Annexin A4                                                                        | Q6LES2   | 1.10 | 1.32 | 1.33 | 1.25 | 0.13 | 16 | 47.4 | 0        |
| IPI00793201 | cDNA FLJ61202, highly similar to Multisynthetase complex auxiliary component p43  | B4E1S7   | 0.88 | 0.98 | 0.93 | 0.93 | 0.05 | 13 | 49.4 | 5.9E-207 |
| IPI00793330 | 12 kDa protein                                                                    | A8K674   | 1.23 | 1.07 | 1.07 | 1.12 | 0.09 | 11 | 84.4 | 5.8E-269 |
| IPI00793330 | cDNA FLJ75516, highly similar to Xenopus tropicalis ubiquitin C, mRNA             | A8K674   | 1.23 | 1.07 | 1.07 | 1.12 | 0.09 | 11 | 84.4 | 5.8E-269 |
| IPI00793375 | Aminoacylproline aminopeptidase                                                   | Q9NQW7-1 | 0.98 | 1.12 | 1.12 | 1.07 | 0.08 | 7  | 14.4 | 2.59E-81 |
| IPI00793381 | Proteasome (Prosome, macropain) 26S subunit, non-ATPase, 6, isoform CRA_b         | C9IZE4   | 0.92 |      |      | 0.92 |      | 17 | 38.5 | 8.6E-171 |
| IPI00793696 | 60S ribosomal protein L24                                                         | P83731   | 0.98 | 0.95 | 0.91 | 0.94 | 0.04 | 9  | 39.3 | 1.92E-50 |
| IPI00793717 | Uncharacterized protein C21orf59                                                  | C9JB10   |      | 0.89 |      | 0.89 |      | 2  | 10.4 | 1.38E-24 |
| IPI00793723 | CDK7/cyclin-H assembly factor                                                     | P51948   | 0.73 | 1.03 |      | 0.88 | 0.21 | 4  | 12.6 | 3.01E-17 |
| IPI00793922 | 9 kDa protein                                                                     |          | 1.02 | 1.14 | 0.84 | 1.00 | 0.15 | 8  | 68.7 | 4E-211   |

|             |                                                                                                 |          |      |      |      |      |      |    |      |          |
|-------------|-------------------------------------------------------------------------------------------------|----------|------|------|------|------|------|----|------|----------|
| IPI00794221 | Putative uncharacterized protein DBN1                                                           | A8MV58   | 1.13 |      |      | 1.13 |      | 25 | 44.5 | 9.2E-290 |
| IPI00794252 | Cysteine-rich with EGF-like domain protein 2                                                    | Q6UXH1-5 | 1.00 | 0.90 | 1.00 | 0.97 | 0.06 | 3  | 10.2 | 1.15E-28 |
| IPI00794278 | Anaphase-promoting complex subunit 3                                                            | P30260   |      | 1.19 | 0.18 | 0.69 | 0.71 | 3  | 4.3  | 1.11E-28 |
| IPI00794284 | Epithelial cell-transforming sequence 2 oncogene                                                | Q9H8V3-2 |      | 1.07 |      | 1.07 |      | 2  | 2.9  | 4.01E-09 |
| IPI00794402 | Rho GDP-dissociation inhibitor 1                                                                | P52565   | 1.02 | 1.02 | 1.05 | 1.03 | 0.02 | 10 | 27.7 | 2.8E-263 |
| IPI00794461 | Histone H2B type 1-N                                                                            | Q99877   |      | 1.13 |      | 1.13 |      | 12 | 48.8 | 1.3E-139 |
| IPI00794521 | Putative uncharacterized protein DKFZp434J046                                                   | Q9UFV9   | 0.73 |      |      | 0.73 |      | 2  | 1.8  | 1.36E-40 |
| IPI00794605 | 18 kDa protein                                                                                  |          | 1.05 |      |      | 1.05 |      | 14 | 67.1 | 0        |
| IPI00794613 | GTPase-activating protein RAB7                                                                  | Q8TC07-2 | 1.06 | 1.19 | 1.22 | 1.16 | 0.08 | 11 | 20.1 | 2E-140   |
| IPI00794659 | cDNA FLJ58953, highly similar to 40S ribosomal protein S20                                      | B4DW28   | 0.81 | 0.91 | 0.88 | 0.87 | 0.05 | 7  | 33.8 | 3.79E-58 |
| IPI00794806 | cDNA FLJ56179, highly similar to Pyruvate dehydrogenase (lipoamide)-phosphatase 1 (EC 3.1.3.43) | B4DYX8   | 0.90 |      |      | 0.90 |      | 2  | 5.2  | 9.32E-55 |
| IPI00794900 | C-1-tetrahydrofolate synthase, cytoplasmic                                                      | B2R5Y2   | 0.94 |      |      | 0.94 |      | 29 | 28   | 3.6E-220 |
| IPI00794956 | Putative uncharacterized protein SCFD1                                                          | A8MVJ7   | 0.92 | 1.19 | 1.01 | 1.04 | 0.14 | 8  | 22   | 1.2E-280 |
| IPI00795107 | Hepatocarcinoma high expression protein                                                         | Q6P1N9-1 | 0.81 | 0.88 | 0.86 | 0.85 | 0.04 | 4  | 12.9 | 2.22E-16 |
| IPI00795257 | 32 kDa protein                                                                                  |          | 1.05 | 0.99 |      | 1.02 | 0.04 | 25 | 82.9 | 0        |
| IPI00795287 | Uncharacterized protein C12orf29                                                                | Q8N999-1 | 0.93 |      | 0.97 | 0.95 | 0.03 | 2  | 5.5  | 2.94E-05 |
| IPI00795553 | Armadillo repeat-containing protein 8                                                           | Q8IUR7-1 |      | 1.13 |      | 1.13 |      | 2  | 3.4  | 0.001047 |
| IPI00795611 | cDNA FLJ59232, highly similar to ARF GTPase-activating protein GIT1                             | B4DGU9   |      |      | 1.34 | 1.34 |      | 3  | 4.5  | 0.003114 |
| IPI00795627 | cDNA FLJ51883, highly similar to Mitochondrial 39S ribosomal protein L3                         | B4DKM0   | 0.73 | 0.91 | 0.87 | 0.84 | 0.10 | 3  | 9.9  | 1.45E-10 |
| IPI00795769 | Cytokine-induced protein of 29 kDa                                                              | P82979   | 1.42 | 1.09 | 1.06 | 1.19 | 0.20 | 7  | 17   | 2.1E-142 |
| IPI00795842 | Alpha mannosidase 6A8B                                                                          | Q9NTJ4   |      | 1.02 |      | 1.02 |      | 3  | 2.5  | 0.012655 |
| IPI00795922 | Mitochondrial ribosomal protein S28 variant                                                     | Q53G62   | 0.85 | 0.89 | 0.92 | 0.89 | 0.04 | 6  | 37.5 | 3.88E-22 |
| IPI00795979 | Epidermal surface antigen                                                                       | Q14254   | 1.04 |      |      | 1.04 |      | 2  | 4.8  | 2.36E-30 |
| IPI00795990 | cDNA FLJ50931, highly similar to Tight junction protein ZO-1                                    | B4DZK4   |      | 1.14 |      | 1.14 |      | 18 | 14.8 | 1.6E-169 |
| IPI00796062 | HCG2022684, isoform CRA_b                                                                       | C9J8T6   |      |      | 0.76 | 0.76 |      | 2  | 17.3 | 2.59E-47 |
| IPI00796114 | cDNA FLJ11889 fis, clone HEMBA1007251, weakly similar to Homo sapiens F-box protein             | Q9HAA5   |      |      | 0.09 | 0.09 |      | 2  | 1.1  | 0.003006 |

|             |                                                                                                                       |          |      |      |      |      |      |    |      |          |
|-------------|-----------------------------------------------------------------------------------------------------------------------|----------|------|------|------|------|------|----|------|----------|
|             | FBX29 (FBX29) mRNA                                                                                                    |          |      |      |      |      |      |    |      |          |
| IPI00796284 | cDNA FLJ57946, highly similar to Elongation factor 1-delta                                                            | B4DDU4   |      |      | 0.80 | 0.80 |      | 11 | 51.1 | 4.5E-151 |
| IPI00796333 | Fructose-bisphosphate aldolase A                                                                                      | P04075   | 0.95 | 1.11 | 1.06 | 1.04 | 0.08 | 36 | 75.1 | 0        |
| IPI00796366 | cDNA FLJ56329, highly similar to Myosin light polypeptide 6                                                           | B7Z6Z4   | 0.97 | 0.98 | 0.98 | 0.98 | 0.01 | 12 | 44.5 | 0        |
| IPI00796379 | cDNA FLJ57067, highly similar to Beta-2-microglobulin                                                                 | B4E0X1   | 0.91 | 1.54 |      | 1.22 | 0.44 | 3  | 18.9 | 6.78E-20 |
| IPI00796467 | NA                                                                                                                    |          | 0.94 | 1.08 |      | 1.01 | 0.10 | 1  | 18.6 | 2.54E-11 |
| IPI00796519 | Testis expressed sequence 264 variant                                                                                 | Q53GI2   | 1.04 |      |      | 1.04 |      | 2  | 7.1  | 0.001736 |
| IPI00796864 | Dolichyl-phosphate mannosyltransferase polypeptide 1, catalytic subunit                                               | Q5QPK0   | 1.23 | 0.95 | 1.17 | 1.12 | 0.14 | 5  | 19.3 | 4.95E-92 |
| IPI00796891 | Golgin B1                                                                                                             | B2ZZ91   | 1.14 | 0.87 | 1.01 | 1.01 | 0.14 | 19 | 9.1  | 0        |
| IPI00796914 | cDNA, FLJ95791, highly similar to Homo sapiens aurora kinase B (AURKB), mRNA                                          | B2RC06   | 1.00 | 1.24 | 1.25 | 1.16 | 0.14 | 4  | 15.1 | 1.09E-14 |
| IPI00796919 | Beta-galactosidase                                                                                                    | B7Z6Q5   | 1.21 | 0.95 | 1.16 | 1.10 | 0.14 | 4  | 7.2  | 1.63E-58 |
| IPI00796934 | cDNA FLJ78093, highly similar to Homo sapiens ribosomal protein L29 (RPL29), mRNA                                     | A8K0H3   | 1.12 | 0.92 |      | 1.02 | 0.14 | 3  | 19.5 | 2.3E-111 |
| IPI00797013 | cDNA FLJ57452, highly similar to Nucleoside diphosphate-linked moiety X motif16 (EC 3.6.1.-)                          | B4E3B4   | 1.16 |      |      | 1.16 |      | 3  | 14.1 | 8.7E-19  |
| IPI00797038 | cDNA FLJ50710, highly similar to Phosphoenolpyruvate carboxykinase (GTP), mitochondrial (EC 4.1.1.32)                 | B4DW73   | 0.93 | 1.15 | 1.03 | 1.04 | 0.11 | 8  | 18.3 | 2E-183   |
| IPI00797126 | Alpha-NAC                                                                                                             | Q13765   | 0.87 | 0.76 | 0.77 | 0.80 | 0.06 | 6  | 7.8  | 0        |
| IPI00797136 | Inhibitor of nuclear factor kappa-B kinase-interacting protein                                                        | Q70UQ0-1 | 1.20 | 1.10 | 1.16 | 1.15 | 0.05 | 9  | 27.4 | 6.8E-116 |
| IPI00797279 | cDNA FLJ78091, highly similar to Homo sapiens ubiquitin-like, containing PHD and RING finger domains, 1 (UHRF1), mRNA | A8K024   | 0.95 | 1.33 | 1.16 | 1.15 | 0.19 | 14 | 18.4 | 5.25E-77 |
| IPI00797384 | La ribonucleoprotein domain family member 4                                                                           | Q71RC2-4 | 0.60 | 0.88 | 0.80 | 0.76 | 0.15 | 6  | 11   | 2.71E-55 |
| IPI00797406 | cDNA FLJ37430 fis, clone BRAWH2001679, highly similar to Homo sapiens NMD3 homolog (NMD3), mRNA                       | B3KT11   | 0.99 | 0.95 | 0.83 | 0.92 | 0.08 | 5  | 12.1 | 8.02E-66 |
| IPI00797537 | Chronic myelogenous leukemia tumor antigen 66                                                                         | Q96RS6-1 | 0.93 | 1.00 | 0.89 | 0.94 | 0.05 | 7  | 13.4 | 3.5E-166 |
| IPI00797572 | cDNA FLJ60491, highly similar to IQ motif and Sec7 domain-containing protein 1                                        | B4DGC5   | 0.81 |      |      | 0.81 |      | 1  | 1.8  | 9.75E-12 |
| IPI00797603 | 39 kDa phosphoribosylpyrophosphate synthase-                                                                          | Q14558   | 1.27 | 1.36 | 1.18 | 1.27 | 0.09 | 9  | 35.3 | 2.7E-130 |

|             |                                                                                                                    |           |      |      |      |      |      |    |      |          |  |
|-------------|--------------------------------------------------------------------------------------------------------------------|-----------|------|------|------|------|------|----|------|----------|--|
|             | associated protein                                                                                                 |           |      |      |      |      |      |    |      |          |  |
| IPI00797612 | WD repeat-containing protein 6                                                                                     | B4DHK2    | 1.21 | 1.37 | 1.12 | 1.23 | 0.13 | 6  | 10.6 | 4.11E-57 |  |
| IPI00797738 | Cytochrome c oxidase subunit 6B1                                                                                   | P14854    | 0.87 | 0.98 | 0.94 | 0.93 | 0.06 | 4  | 45.6 | 1.64E-55 |  |
| IPI00797771 | Uncharacterized protein C20orf117                                                                                  | O94964-2  |      |      | 0.96 | 0.96 |      | 2  | 2.2  | 8.49E-65 |  |
| IPI00797887 | cDNA FLJ58199, highly similar to Fragile X mental retardation syndrome-related protein 1                           | B4DM78    | 0.66 |      |      | 0.66 |      | 15 | 34.5 | 1.2E-160 |  |
| IPI00798011 | Putative uncharacterized protein SUMO3                                                                             | A8MU27    | 1.31 | 0.95 | 1.03 | 1.10 | 0.19 | 3  | 17   | 3.71E-51 |  |
| IPI00798034 | Protein KRI1 homolog                                                                                               | Q8N9T8-1  |      | 0.94 | 1.05 | 1.00 | 0.07 | 7  | 13.2 | 4.33E-44 |  |
| IPI00798041 | cDNA FLJ58665, highly similar to Serine/threonine-protein phosphatase 2A 55 kDa regulatory subunit B alpha isoform | B4E1T7    | 0.93 | 1.10 | 1.03 | 1.02 | 0.09 | 9  | 21.9 | 1.5E-141 |  |
| IPI00798102 | PEP11 homolog                                                                                                      | Q9UBQ0-2  | 1.02 | 1.15 | 1.14 | 1.10 | 0.07 | 6  | 25.7 | 2.98E-44 |  |
| IPI00798272 | Branched-chain-amino-acid aminotransferase                                                                         | B7Z5L0    | 0.89 | 1.01 | 0.74 | 0.88 | 0.13 | 6  | 19.8 | 4.07E-93 |  |
| IPI00807412 | Cytosolic 5-nucleotidase 3                                                                                         | Q9H0P0-4  | 0.82 |      |      | 0.82 |      | 2  | 6.5  | 7.34E-42 |  |
| IPI00807498 | CCDC6 protein                                                                                                      | Q05CP8    |      | 1.03 | 1.04 | 1.04 | 0.00 | 7  | 23.4 | 1.17E-93 |  |
| IPI00807545 | Heterogeneous nuclear ribonucleoprotein K                                                                          | P61978-3  | 1.19 |      |      | 1.19 |      | 27 | 56.8 | 0        |  |
| IPI00815642 | TMSB4X protein                                                                                                     | Q0P5N8    | 1.50 | 1.07 | 0.93 | 1.16 | 0.30 | 5  | 35.7 | 1E-41    |  |
| IPI00815672 | Axonal transporter of synaptic vesicles                                                                            | Q12756-2  | 0.60 |      |      | 0.60 |      | 2  | 1.3  | 0.001573 |  |
| IPI00815707 | Ankyrin repeat and KH domain-containing protein 1                                                                  | Q8IWZ3-4  |      | 0.91 |      | 0.91 |      | 7  | 3.9  | 2.52E-23 |  |
| IPI00815713 | Treacher Collins syndrome protein                                                                                  | Q13428-4  | 1.21 | 1.01 | 0.85 | 1.02 | 0.18 | 10 | 8.7  | 2.9E-137 |  |
| IPI00815770 | Protein SDP3                                                                                                       | O60493-1  | 0.99 | 1.19 | 1.22 | 1.13 | 0.12 | 10 | 55.6 | 1.25E-76 |  |
| IPI00816217 | Structural maintenance of chromosomes protein 6                                                                    | Q96SB8-2  |      | 0.93 | 0.69 | 0.81 | 0.17 | 3  | 4.7  | 9.64E-58 |  |
| IPI00816474 | Mammalian retrotransposon derived protein 8C                                                                       | A6ZKI3    | 1.06 | 1.75 |      | 1.41 | 0.49 | 4  | 26.5 | 1.03E-06 |  |
| IPI00816707 | NBPF8 isoform 5                                                                                                    | Q3BBV4    |      |      | 1.16 | 1.16 |      | 2  | 2.5  | 0.01693  |  |
| IPI00827625 | Calcium/calmodulin-dependent protein kinase type II subunit delta                                                  | Q13557-11 | 0.81 | 1.04 |      | 0.93 | 0.17 | 9  | 24.8 | 2.2E-254 |  |
| IPI00827871 | Zinc finger homeobox protein 4                                                                                     | Q86UP3-2  |      | 0.91 |      | 0.91 |      | 2  | 0.6  | 0.021335 |  |
| IPI00827967 | Partner of ARF                                                                                                     | Q3YEC7-2  |      | 1.17 | 1.22 | 1.19 | 0.03 | 3  | 4.9  | 3.12E-05 |  |
| IPI00827972 | Partner of ARF                                                                                                     | Q3YEC7-1  | 1.11 |      |      | 1.11 |      | 2  | 3.7  | 0.000288 |  |
| IPI00828021 | Heat shock 70 kDa protein 4-like protein                                                                           | A2ICT2    | 1.27 | 0.99 | 1.02 | 1.10 | 0.16 | 13 | 17.5 | 1.26E-87 |  |
| IPI00828080 | Arf-GAP with Rho-GAP domain, ANK repeat and                                                                        | Q96P48-6  |      | 1.36 | 1.10 | 1.23 | 0.18 | 5  | 5.1  | 3.07E-62 |  |



|             |                                                    |          |      |      |      |      |      |     |      |          |
|-------------|----------------------------------------------------|----------|------|------|------|------|------|-----|------|----------|
|             | PH domain-containing protein 1                     |          |      |      |      |      |      |     |      |          |
| IPI00828125 | Neutral sphingomyelinase 3                         | Q9NXE4-4 | 1.52 | 1.01 | 0.79 | 1.11 | 0.38 | 4   | 8.2  | 5.58E-22 |
| IPI00828150 | Protein 40-6-3                                     | Q9Y2Z0-1 | 0.93 | 0.91 | 1.02 | 0.95 | 0.06 | 10  | 32.1 | 1E-130   |
| IPI00828172 | Protein FAM114A2                                   | Q9NRY5-1 |      | 1.74 | 1.31 | 1.52 | 0.30 | 5   | 15.6 | 5.3E-123 |
| IPI00828189 | L-isoaspartyl protein carboxyl methyltransferase   | P22061-2 | 1.10 | 1.09 | 1.10 | 1.09 | 0.01 | 10  | 51.4 | 8.1E-204 |
| IPI00829707 | Dermal papilla-derived protein 6                   | Q8TE02-4 |      |      | 1.18 | 1.18 |      | 2   | 10.5 | 1.14E-05 |
| IPI00829741 | Ankyrin repeat and LEM domain-containing protein 2 | Q86XL3-1 | 0.74 |      |      | 0.74 |      | 3   | 7.4  | 1.8E-27  |
| IPI00829826 | Activator-recruited cofactor 205 kDa component     | Q15648-1 |      |      | 0.92 | 0.92 |      | 2   | 1.5  | 1.01E-11 |
| IPI00829835 | G patch domain-containing protein 4                | Q5T3I0-1 |      |      | 0.72 | 0.72 |      | 7   | 21.7 | 1.03E-63 |
| IPI00829865 | Protein SMILE                                      | Q6ZXV5-1 |      |      | 0.87 | 0.87 |      | 3   | 4.4  | 6.3E-07  |
| IPI00829992 | Myosin I beta                                      | O00159-3 | 1.10 | 1.15 | 1.11 | 1.12 | 0.03 | 44  | 44.7 | 0        |
| IPI00830108 | DnaJ homolog subfamily C member 2                  | Q99543-1 | 0.96 | 0.88 | 0.84 | 0.89 | 0.06 | 4   | 8.7  | 5.01E-98 |
| IPI00830136 | Uncharacterized protein C1orf31                    | Q5JTJ3-2 | 1.25 | 0.71 | 0.44 | 0.80 | 0.41 | 4   | 26.9 | 6.41E-85 |
| IPI00843975 | Cytovillin                                         | P15311   | 1.07 | 1.13 | 1.11 | 1.11 | 0.03 | 40  | 58.5 | 0        |
| IPI00844000 | E3 UFM1-protein ligase 1                           | O94874   | 0.97 | 1.12 | 1.06 | 1.05 | 0.07 | 12  | 17   | 4.1E-183 |
| IPI00844014 | Uncharacterized protein C9orf114                   | Q5T280   | 0.94 | 1.51 | 1.09 | 1.18 | 0.30 | 3   | 10.4 | 4.09E-31 |
| IPI00844050 | Basic FGF-repressed Zic-binding protein            | Q9NVA1-1 | 1.00 | 1.08 | 0.94 | 1.01 | 0.07 | 3   | 10   | 5.14E-10 |
| IPI00844090 | Collagen alpha-1(V) chain                          | P20908   | 1.54 | 0.98 | 1.61 | 1.38 | 0.35 | 9   | 8.1  | 1.14E-65 |
| IPI00844193 | Zinc finger protein 593                            | O00488   | 0.94 | 0.73 | 0.68 | 0.79 | 0.14 | 3   | 38.8 | 3.9E-102 |
| IPI00844214 | Beta-catenin-like protein 1                        | Q8WYA6-1 | 0.93 | 1.04 | 1.28 | 1.09 | 0.18 | 7   | 14.9 | 3.93E-17 |
| IPI00844215 | Alpha-II spectrin                                  | Q13813-1 | 1.07 | 1.04 | 1.10 | 1.07 | 0.03 | 116 | 51.7 | 0        |
| IPI00844264 | Putative uncharacterized protein DKFZp779B0247     | Q68DF1   | 0.90 | 1.18 | 1.14 | 1.07 | 0.15 | 25  | 32.7 | 0        |
| IPI00844303 | Unc-84 homolog A (C. elegans)                      | A4D2Q0   | 1.23 |      |      | 1.23 |      | 2   | 3.3  | 3.88E-14 |
| IPI00844311 | Uridine-cytidine kinase-like 1                     | Q9NWZ5-1 |      | 0.62 |      | 0.62 |      | 2   | 4.4  | 0.030848 |
| IPI00844377 | Diaphanous-related formin-2                        | O60879-1 | 0.90 |      | 1.01 | 0.96 | 0.08 | 2   | 2.6  | 2.83E-19 |
| IPI00844425 | Probable protein BRICK1                            | Q8WUW1-2 | 0.76 | 1.28 | 1.19 | 1.08 | 0.28 | 4   | 34.9 | 6.53E-55 |
| IPI00844507 | UPF0688 protein C1orf174                           | Q8IYL3   | 1.17 | 1.59 | 1.15 | 1.31 | 0.25 | 2   | 13.2 | 7.4E-126 |
| IPI00844578 | ATP-dependent RNA helicase A                       | Q08211   | 0.97 | 1.02 | 1.00 | 0.99 | 0.02 | 57  | 44.4 | 0        |

|             |                                                                                                                        |          |      |      |      |      |      |    |      |          |
|-------------|------------------------------------------------------------------------------------------------------------------------|----------|------|------|------|------|------|----|------|----------|
| IPI00845263 | FN1 protein                                                                                                            | Q14328   | 0.68 | 1.27 | 1.07 | 1.01 | 0.30 | 77 | 39.7 | 0        |
| IPI00845373 | DNA-binding factor KBF2                                                                                                | Q00653-1 |      | 1.08 |      | 1.08 |      | 3  | 5.2  | 3.33E-17 |
| IPI00845453 | Uncharacterized protein C18orf21 (HBV X-transactivated protein 13).                                                    | Q8TBS0   |      | 1.30 |      | 1.30 |      | 1  | 6.2  | 3.78E-39 |
| IPI00847168 | RSU1 protein                                                                                                           | Q32Q10   | 1.14 |      | 1.08 | 1.11 | 0.04 | 10 | 32.1 | 1.27E-60 |
| IPI00847637 | MAP7 domain-containing protein 3                                                                                       | Q8IWC1-1 |      | 0.98 |      | 0.98 |      | 1  | 1.7  | 2.5E-08  |
| IPI00847665 | cDNA FLJ55165, highly similar to Particularly interesting new Cys-His protein                                          | B7Z7R3   | 0.88 | 1.18 | 1.04 | 1.03 | 0.15 | 11 | 34.6 | 6.2E-156 |
| IPI00847670 | NA                                                                                                                     |          | 0.99 | 1.03 | 1.07 | 1.03 | 0.04 | 6  | 28   | 9.72E-68 |
| IPI00847793 | Dermcidin isoform 2                                                                                                    | A5JHP3   | 6.12 | 0.17 | 0.08 | 2.12 | 3.46 | 1  | 9.1  | 4.74E-07 |
| IPI00847987 | Formin homology 2 domain-containing protein 2                                                                          | Q96PY5-1 |      | 0.96 |      | 0.96 |      | 4  | 4.6  | 7.36E-11 |
| IPI00848090 | cDNA, FLJ94534, highly similar to Homo sapiens capping protein (actin filament), gelsolin-like(CAPG), mRNA             | B2R9S4   | 0.79 | 1.88 | 1.50 | 1.39 | 0.55 | 5  | 21.6 | 3.54E-47 |
| IPI00848133 | cDNA FLJ32689 fis, clone TESTI2000207, highly similar to NifU-like N-terminal domain-containing protein, mitochondrial | B3KQ30   |      | 1.16 |      | 1.16 |      | 3  | 21.8 | 1.03E-06 |
| IPI00848174 | cDNA FLJ34950 fis, clone NT2RP7017284, highly similar to Casein kinase I isoform epsilon (EC 2.7.11.1)                 | B3KRV2   |      |      | 1.38 | 1.38 |      | 3  | 9.1  | 5.15E-07 |
| IPI00848226 | Cell proliferation-inducing gene 21 protein                                                                            | P63244   | 0.71 | 0.91 | 0.91 | 0.84 | 0.11 | 21 | 79.8 | 0        |
| IPI00848321 | SMARCD2 protein                                                                                                        | A5PLL5   |      | 1.12 | 1.08 | 1.10 | 0.03 | 4  | 10.7 | 8.29E-41 |
| IPI00848328 | Similar to peroxisomal enoyl-coenzyme A hydratase-like protein                                                         |          | 0.95 | 1.05 |      | 1.00 | 0.07 | 12 | 49.4 | 8.3E-151 |
| IPI00848334 | Kinesin-2                                                                                                              | O00139-4 |      |      | 1.14 | 1.14 |      | 6  | 7.8  | 9.22E-20 |
| IPI00852645 | Uncharacterized protein KIAA0819                                                                                       | O94909-2 |      | 0.53 | 1.09 | 0.81 | 0.40 | 2  | 1.3  | 1.41E-39 |
| IPI00852659 | Echinoderm microtubule associated protein like 3, isoform CRA_e                                                        | B7WPE2   |      | 1.17 |      | 1.17 |      | 2  | 3.6  | 2.81E-06 |
| IPI00852685 | Diaphanous-related formin-1                                                                                            | O60610-1 | 0.89 | 1.02 | 0.92 | 0.94 | 0.07 | 17 | 17.8 | 3.2E-184 |
| IPI00852741 | ABP125                                                                                                                 | O94979-8 | 0.85 | 1.03 | 1.00 | 0.96 | 0.10 | 37 | 30.1 | 3.2E-265 |
| IPI00852806 | cDNA FLJ13729 fis, clone PLACE3000121, weakly similar to VESICULAR TRAFFIC CONTROL PROTEIN SEC15                       | Q9H8D6   | 2.23 | 1.16 | 1.06 | 1.48 | 0.65 | 4  | 7.2  | 4.34E-21 |
| IPI00852997 | Putative uncharacterized protein CRYZL1                                                                                | A6NHJ8   | 0.95 | 0.93 | 0.99 | 0.96 | 0.03 | 5  | 23.1 | 8.78E-15 |
| IPI00853009 | 50 kDa nuclear polyadenylated RNA-binding protein                                                                      | Q92879-4 | 0.82 | 1.12 | 1.01 | 0.99 | 0.15 | 7  | 17   | 2.64E-50 |

|             |                                                                                                    |           |      |      |      |      |      |    |      |          |
|-------------|----------------------------------------------------------------------------------------------------|-----------|------|------|------|------|------|----|------|----------|
| IPI00853093 | Methyltransferase-like protein 2B                                                                  | Q6P1Q9-1  |      | 0.89 | 0.99 | 0.94 | 0.07 | 3  | 10.8 | 1.03E-22 |
| IPI00853120 | Chromosome-associated protein H2                                                                   | Q6IBW4-4  |      |      | 1.18 | 1.18 |      | 2  | 5.3  | 0.015246 |
| IPI00853201 | Putative uncharacterized protein MRPL23                                                            | A8MYK1    | 0.85 | 0.79 |      | 0.82 | 0.04 | 2  | 11.5 | 3.2E-248 |
| IPI00853224 | Gestational trophoblastic tumor protein 1                                                          | Q9NQZ5    | 0.86 |      | 0.85 | 0.85 | 0.00 | 3  | 9.2  | 1.47E-12 |
| IPI00853278 | SLAIN motif-containing protein 2                                                                   | Q9P270    | 1.03 | 1.21 | 1.00 | 1.08 | 0.12 | 8  | 21.7 | 8.1E-191 |
| IPI00853369 | MM1                                                                                                | O15031    | 1.42 | 1.06 | 1.23 | 1.24 | 0.18 | 5  | 4    | 3.74E-56 |
| IPI00853400 | 133 kDa FK506-binding protein                                                                      | Q5T1M5-1  | 1.00 | 1.13 | 1.04 | 1.05 | 0.07 | 7  | 10.2 | 9.4E-166 |
| IPI00853598 | cDNA FLJ56334, highly similar to SEC13-related protein                                             | B4DXJ1    | 0.85 | 1.01 | 1.02 | 0.96 | 0.10 | 13 | 46.2 | 0        |
| IPI00854642 | Cell proliferation-inducing gene 54 protein                                                        | Q29RF7-1  | 0.92 | 1.00 | 1.00 | 0.97 | 0.05 | 25 | 24.9 | 0        |
| IPI00854741 | DLG4                                                                                               | Q15334    | 1.61 | 1.13 | 1.08 | 1.27 | 0.29 | 9  | 13.2 | 1.15E-47 |
| IPI00855725 | TGN38 homolog                                                                                      | O43493-4  |      | 0.96 |      | 0.96 |      | 4  | 17.2 | 2.82E-57 |
| IPI00855767 | cDNA FLJ30470 fis, clone BRAWH1000040, highly similar to Rap1 GTPase-GDP dissociation stimulator 1 | B3KNU0    | 0.87 | 0.98 | 0.95 | 0.93 | 0.06 | 11 | 23.5 | 1.1E-130 |
| IPI00855785 | Anastellin                                                                                         | P02751-15 | 0.66 |      |      | 0.66 |      | 76 | 39.3 | 0        |
| IPI00855820 | Protein MON2 homolog                                                                               | Q7Z3U7-1  |      | 0.89 | 0.65 | 0.77 | 0.17 | 3  | 2.1  | 0.000176 |
| IPI00855873 | Transmembrane protein 192                                                                          | Q8IY95-1  | 0.92 | 1.01 | 1.04 | 0.99 | 0.06 | 3  | 15.5 | 8.92E-84 |
| IPI00855940 | cDNA FLJ76855, highly similar to Homo sapiens exportin 7 (XPO7), mRNA                              | A8K607    | 1.06 | 1.22 | 1.04 | 1.10 | 0.10 | 13 | 14.6 | 5.9E-212 |
| IPI00855954 | cDNA FLJ58388                                                                                      | B4DUI4    |      | 1.15 | 0.91 | 1.03 | 0.17 | 2  | 12.3 | 0.000191 |
| IPI00855998 | AH antigen                                                                                         | P49454    | 1.08 | 1.24 | 1.06 | 1.12 | 0.10 | 6  | 2.8  | 1.74E-22 |
| IPI00856045 | Protein AHNK2                                                                                      | Q8IVF2-1  | 0.71 | 1.14 |      | 0.93 | 0.31 | 4  | 1    | 5.09E-06 |
| IPI00856098 | p180/ribosome receptor                                                                             | A7BI36    | 1.10 | 0.81 | 0.95 | 0.95 | 0.15 | 56 | 55.6 | 0        |
| IPI00856116 | Palladin                                                                                           | Q8WX93-1  | 0.68 |      | 1.20 | 0.94 | 0.37 | 5  | 5.1  | 6.93E-30 |
| IPI00867503 | Amplified in breast cancer gene 2 protein                                                          | Q8ND04-2  | 0.85 |      |      | 0.85 |      | 3  | 4.7  | 3.6E-151 |
| IPI00867509 | Coronin-1C_i2 protein                                                                              | A7MAP0    | 0.88 | 1.04 | 0.98 | 0.97 | 0.08 | 31 | 45.7 | 0        |
| IPI00867529 | Kinesin-2                                                                                          | O00139-2  | 1.12 | 1.27 |      | 1.20 | 0.10 | 8  | 13.8 | 4.78E-45 |
| IPI00867714 | Protein LSM12 homolog                                                                              | Q3MHD2-2  | 0.88 | 1.00 | 0.90 | 0.92 | 0.07 | 5  | 28.3 | 3.23E-26 |
| IPI00867735 | UPF0488 protein C8orf33                                                                            | Q9H7E9-2  | 0.81 | 0.90 | 0.83 | 0.85 | 0.05 | 4  | 20.7 | 9.47E-74 |
| IPI00867739 | cDNA FLJ60533, highly similar to Kinesin-like                                                      | B4DHG8    |      | 0.99 | 0.95 | 0.97 | 0.03 | 3  | 4.7  | 5.46E-13 |

|             |                                                                                                                     |          |      |      |      |      |      |    |      |          |
|-------------|---------------------------------------------------------------------------------------------------------------------|----------|------|------|------|------|------|----|------|----------|
|             | protein KIF3A                                                                                                       |          |      |      |      |      |      |    |      |          |
| IPI00871157 | Putative uncharacterized protein SRPK2                                                                              | A6NF09   | 1.25 |      |      | 1.25 |      | 3  | 5.1  | 0.00058  |
| IPI00871174 | Associate of Myc 1                                                                                                  | Q99417   |      |      | 0.94 | 0.94 |      | 4  | 46.6 | 9.12E-12 |
| IPI00871240 | cDNA FLJ56906, highly similar to RNA-binding protein 16                                                             | B7Z3A4   | 1.19 | 1.19 | 1.12 | 1.17 | 0.04 | 5  | 5.6  | 1.08E-40 |
| IPI00871372 | cDNA FLJ43800 fis, clone TESTI4000349, highly similar to E3 ubiquitin-protein ligase HECTD1                         | B3KWT6   | 0.81 | 0.84 | 0.96 | 0.87 | 0.08 | 11 | 6.7  | 7.35E-51 |
| IPI00871467 | Neural cell adhesion molecule L1                                                                                    | P32004-1 | 1.24 | 0.50 | 1.45 | 1.06 | 0.50 | 4  | 5.2  | 9.63E-14 |
| IPI00871617 | BRCA1/BRCA2-containing complex subunit 3                                                                            | P46736-2 | 0.90 | 1.38 |      | 1.14 | 0.34 | 3  | 15.1 | 7.74E-18 |
| IPI00871680 | Putative uncharacterized protein ARFGAP2                                                                            | A8MXL3   | 0.85 | 1.26 | 1.13 | 1.08 | 0.21 | 8  | 21.1 | 5.7E-209 |
| IPI00871686 | cDNA FLJ61103, highly similar to CLIP-associating protein 2                                                         | B4DF74   |      |      | 0.95 | 0.95 |      | 5  | 6    | 2.8E-172 |
| IPI00871704 | Putative uncharacterized protein DIAPH3                                                                             | A8MYX0   | 0.63 | 0.68 | 0.85 | 0.72 | 0.12 | 4  | 2.9  | 1.35E-80 |
| IPI00871780 | RNA-binding motif protein 12B                                                                                       | Q8IXT5   | 0.89 | 0.94 | 0.81 | 0.88 | 0.06 | 5  | 10.5 | 2.61E-12 |
| IPI00871827 | 60S ribosomal protein L7                                                                                            | A8MVV7   |      | 0.86 | 0.87 | 0.86 | 0.01 | 25 | 56.6 | 3.8E-234 |
| IPI00871851 | Neural precursor cell expressed developmentally down-regulated protein 5                                            | Q15019-2 | 1.15 | 1.15 | 1.20 | 1.17 | 0.03 | 17 | 55.6 | 0        |
| IPI00871854 | Putative uncharacterized protein SAMM50                                                                             | A8MZI2   | 0.99 | 0.89 | 0.97 | 0.95 | 0.06 | 9  | 26.7 | 2.71E-53 |
| IPI00871870 | Actin-related protein 2/3 complex subunit 3                                                                         | A8MYY8   | 0.95 | 1.18 | 1.12 | 1.08 | 0.12 | 10 | 51.7 | 2.64E-61 |
| IPI00871890 | cDNA FLJ75056, highly similar to Homo sapiens phosphatidylinositol binding clathrin assembly protein (PICALM), mRNA | A8K5U9   | 0.87 | 0.96 | 1.00 | 0.95 | 0.07 | 13 | 29.4 | 0        |
| IPI00871891 | Putative uncharacterized protein COMMD8                                                                             | A8MQB6   | 0.96 | 1.04 | 0.91 | 0.97 | 0.06 | 3  | 19.1 | 4.77E-09 |
| IPI00871903 | Putative uncharacterized protein PLRG1                                                                              | A8MW61   | 0.88 | 1.13 | 1.01 | 1.00 | 0.13 | 7  | 25.5 | 9.14E-68 |
| IPI00871988 | cDNA FLJ58980, highly similar to Sideroflexin-3                                                                     | B4DRS6   | 1.09 | 0.94 | 1.11 | 1.05 | 0.09 | 4  | 18.2 | 4.6E-38  |
| IPI00872028 | NUMA1 variant protein                                                                                               | Q4LE64   | 1.22 | 1.27 | 1.22 | 1.24 | 0.03 | 69 | 42.2 | 0        |
| IPI00872261 | Adenosylhomocysteinase                                                                                              | A8MYU1   |      | 1.31 | 1.15 | 1.23 | 0.11 | 9  | 17.9 | 6.91E-31 |
| IPI00872292 | Putative GTP-binding protein RAY-like                                                                               | Q9BW83-1 | 1.10 |      | 1.05 | 1.07 | 0.04 | 5  | 38.7 | 3.48E-88 |
| IPI00872352 | HD domain-containing protein 2                                                                                      | Q7Z4H3-1 | 0.98 | 0.91 | 0.98 | 0.96 | 0.04 | 6  | 31.9 | 5.45E-45 |
| IPI00872375 | Solute carrier family 2 (Facilitated glucose transporter), member 1 variant                                         | Q59GX2   | 1.35 | 1.22 | 1.46 | 1.34 | 0.12 | 4  | 9.3  | 2.46E-21 |
| IPI00872387 | 60S ribosomal protein L7                                                                                            | A8MY04   | 0.87 |      |      | 0.87 |      | 21 | 48.4 | 3.7E-114 |
| IPI00872549 | p59scr                                                                                                              | B5ME39   | 1.02 |      | 1.02 | 1.02 | 0.00 | 2  | 5.5  | 1.1E-124 |

|             |                                                                                             |          |      |      |      |      |      |    |      |          |
|-------------|---------------------------------------------------------------------------------------------|----------|------|------|------|------|------|----|------|----------|
| IPI00872556 | cDNA FLJ52228, highly similar to Mps one binder kinase activator-like 1A                    | B4DRY3   | 0.88 | 0.96 | 1.00 | 0.95 | 0.06 | 5  | 25.3 | 2.66E-61 |
| IPI00872664 | Deubiquitinating enzyme 14                                                                  | A8MYA5   | 0.98 | 1.09 | 1.01 | 1.03 | 0.05 | 23 | 45.9 | 3.6E-245 |
| IPI00872733 | Putative uncharacterized protein POLE4                                                      | A8MUW3   |      | 1.23 | 1.02 | 1.12 | 0.15 | 2  | 29.1 | 1.3E-128 |
| IPI00872762 | Succinyl-CoA ligase [GDP-forming] subunit alpha, mitochondrial                              | P53597   | 1.00 | 1.03 | 1.10 | 1.04 | 0.05 | 5  | 18.5 | 1.1E-36  |
| IPI00872817 | Putative uncharacterized protein GLIPR2                                                     | A8MWQ4   | 1.32 | 1.20 | 1.26 | 1.26 | 0.06 | 4  | 42.2 | 1.28E-71 |
| IPI00872859 | Putative uncharacterized protein TUSC3                                                      | A8MSM0   | 0.84 | 1.01 | 1.35 | 1.07 | 0.26 | 4  | 11.8 | 1.22E-72 |
| IPI00872929 | Apolipoprotein B mRNA editing enzyme, catalytic polypeptide-like 3C variant                 | Q59GY0   | 1.96 |      |      | 1.96 |      | 1  | 7.1  | 1.27E-32 |
| IPI00872940 | 60S ribosomal protein L30                                                                   | A8MYX5   | 0.70 | 0.95 | 0.86 | 0.84 | 0.13 | 8  | 64.3 | 1.3E-141 |
| IPI00873116 | Arginine--tRNA ligase                                                                       | A8MX73   | 0.63 | 1.09 | 0.90 | 0.87 | 0.23 | 5  | 9.3  | 2E-54    |
| IPI00873223 | cDNA, FLJ95012, highly similar to Homo sapiens UDP-glucose pyrophosphorylase 2 (UGP2), mRNA | B2RAN1   |      | 1.20 |      | 1.20 |      | 10 | 26.7 | 2.8E-219 |
| IPI00873228 | Lissencephaly-1 protein                                                                     | A8MYH0   | 1.06 | 1.13 | 1.14 | 1.11 | 0.05 | 17 | 43.9 | 9E-285   |
| IPI00873326 | Putative uncharacterized protein UFD1L                                                      | C9JS35   | 0.92 | 1.41 | 1.16 | 1.17 | 0.24 | 8  | 29.2 | 6.77E-49 |
| IPI00873344 | Protein N8                                                                                  | P55327-3 | 0.95 | 0.86 | 0.80 | 0.87 | 0.07 | 8  | 46   | 4.8E-146 |
| IPI00873459 | Septin-10                                                                                   | Q9P0V9-2 |      | 1.52 |      | 1.52 |      | 5  | 14.3 | 3.5E-23  |
| IPI00873472 | Protein transport protein Sec24A                                                            | O95486-1 | 0.91 | 1.17 | 1.10 | 1.06 | 0.13 | 8  | 10.2 | 1.6E-171 |
| IPI00873518 | MAD1 mitotic arrest deficient-like 1 (Yeast)                                                | A4D218   |      | 0.93 | 1.18 | 1.06 | 0.18 | 3  | 5.5  | 1.91E-24 |
| IPI00873534 | Shank-associated RH domain-interacting protein                                              | Q9H0F6-1 |      |      | 1.00 | 1.00 |      | 1  | 3.9  | 2.35E-39 |
| IPI00873577 | Kinesin-like protein 5                                                                      | A8MTR8   | 0.82 | 1.11 | 1.21 | 1.05 | 0.20 | 4  | 5.8  | 2.14E-50 |
| IPI00873607 | Cell proliferation-inducing gene 26 protein                                                 | Q9Y320-1 | 0.63 | 0.82 | 0.78 | 0.74 | 0.10 | 4  | 15.9 | 8.5E-110 |
| IPI00873608 | cDNA FLJ51313, highly similar to Microsomal signal peptidase 18 kDa subunit(EC 3.4.-.-)     | B4DUL4   | 0.89 | 0.87 | 1.02 | 0.93 | 0.08 | 5  | 22.9 | 6.83E-82 |
| IPI00873767 | DNA helicase V                                                                              | Q96AE4-1 | 1.05 | 0.89 | 0.89 | 0.94 | 0.09 | 28 | 48.5 | 0        |
| IPI00873829 | 3-ketoacyl-CoA thiolase, mitochondrial                                                      | A8MVT9   | 0.88 | 1.02 | 0.99 | 0.96 | 0.07 | 13 | 40.3 | 1.8E-195 |
| IPI00873899 | ATP-binding cassette 50                                                                     | Q8NE71-1 | 1.06 | 1.07 | 1.03 | 1.05 | 0.02 | 25 | 35.6 | 0        |
| IPI00873904 | GRIP1-associated protein 1                                                                  | Q4V328-1 | 1.86 | 0.94 | 0.79 | 1.20 | 0.58 | 3  | 7.3  | 9.81E-46 |
| IPI00873935 | Putative uncharacterized protein DKC1                                                       | A8MUT5   | 0.96 | 0.85 | 0.85 | 0.89 | 0.06 | 13 | 30.9 | 1.7E-141 |
| IPI00873982 | Myosin heavy chain 11 smooth muscle isoform                                                 | B1PS43   |      | 0.72 |      | 0.72 |      | 25 | 11.4 | 0        |
| IPI00873991 | Axonemal beta dynein heavy chain 8                                                          | Q96JB1-1 |      | 0.94 |      | 0.94 |      | 3  | 0.5  | 0.062162 |

|             |                                                                                                    |          |      |      |      |      |      |    |      |          |
|-------------|----------------------------------------------------------------------------------------------------|----------|------|------|------|------|------|----|------|----------|
| IPI00874047 | Putative uncharacterized protein MRPS36                                                            | A8MWD6   | 1.13 |      | 1.17 | 1.15 | 0.03 | 1  | 11.7 | 1.49E-05 |
| IPI00874175 | Ubiquitin carrier protein G2                                                                       | A8MW66   |      | 1.16 | 0.91 | 1.04 | 0.17 | 2  | 18.8 | 7.57E-35 |
| IPI00876972 | Inner centromere protein                                                                           | Q9NQS7-1 | 1.02 | 1.52 | 1.31 | 1.28 | 0.25 | 5  | 7.6  | 4.42E-24 |
| IPI00877014 | Ganglioside-induced differentiation-associated protein 1                                           | Q8TB36-1 | 0.90 |      |      | 0.90 |      | 3  | 9.5  | 4.45E-59 |
| IPI00877174 | cDNA FLJ78682, highly similar to Homo sapiens 2-5-oligoadenylate synthetase 3, 100kDa (OAS3), mRNA | A8KA84   |      |      | 1.10 | 1.10 |      | 2  | 2.8  | 7.56E-22 |
| IPI00877716 | TBC1 domain family, member 10A                                                                     | A7E244   | 1.27 |      | 1.25 | 1.26 | 0.02 | 3  | 8.3  | 0.00013  |
| IPI00878015 | 12 kDa protein                                                                                     |          | 0.85 | 0.91 | 1.05 | 0.94 | 0.10 | 1  | 14.2 | 1.7E-160 |
| IPI00878181 | TBC1 domain family member 10B                                                                      | Q4KMP7-2 | 1.40 | 1.39 | 1.03 | 1.27 | 0.21 | 5  | 14.4 | 2.62E-31 |
| IPI00878213 | Embryonic large molecule derived from yolk sac                                                     | Q8WYP5-2 | 1.02 | 0.96 | 0.90 | 0.96 | 0.06 | 15 | 9.7  | 7.6E-152 |
| IPI00878256 | Putative uncharacterized protein ENSP00000395989                                                   | C9JFH9   | 1.23 |      |      | 1.23 |      | 2  | 6.2  | 1.31E-43 |
| IPI00878392 | NA                                                                                                 |          |      | 0.88 |      | 0.88 |      | 6  | 67.4 | 7.5E-108 |
| IPI00878551 | cDNA FLJ38619 fis, clone HEART2007696, highly similar to Protein disulfide-isomerase (EC 5.3.4.1)  | B3KTQ9   | 1.31 |      |      | 1.31 |      | 37 | 72.3 | 0        |
| IPI00878557 | Delta transcription factor                                                                         | P25490   |      |      | 1.32 | 1.32 |      | 2  | 4.5  | 0.000109 |
| IPI00878669 | Putative uncharacterized protein CBX1                                                              | B5MD17   |      | 1.13 | 1.10 | 1.12 | 0.02 | 11 | 46   | 0        |
| IPI00878984 | D-dopachrome decarboxylase                                                                         | P30046   |      | 1.22 | 1.13 | 1.17 | 0.06 | 5  | 31.8 | 6.8E-94  |
| IPI00879004 | DNA topoisomerase 2-alpha                                                                          | P06786   | 1.06 | 1.20 | 1.15 | 1.14 | 0.08 | 33 | 23.1 | 0        |
| IPI00879210 | General transcription factor 3C polypeptide 5                                                      | Q9Y5Q8-3 |      | 1.00 | 0.91 | 0.95 | 0.06 | 3  | 7.8  | 1.32E-46 |
| IPI00879287 | Putative uncharacterized protein CDCA5                                                             | B5MBX0   | 1.14 | 1.38 | 1.63 | 1.38 | 0.25 | 5  | 29.6 | 2.2E-61  |
| IPI00879742 | ADP-ribosylation factor GTPase activating protein 3                                                | B0QYV8   |      | 1.23 |      | 1.23 |      | 9  | 26.8 | 5.1E-117 |
| IPI00879750 | Small nuclear ribonucleoprotein Sm D3                                                              | C9JQC3   | 0.96 | 0.84 | 0.91 | 0.90 | 0.06 | 4  | 24   | 1.68E-86 |
| IPI00879822 | NA                                                                                                 |          |      | 1.03 |      | 1.03 |      | 3  | 21.3 | 0.006988 |
| IPI00880117 | Apolipoprotein B mRNA editing enzyme, catalytic polypeptide-like 3B                                | B0QYD3   | 1.00 |      | 2.26 | 1.63 | 0.89 | 4  | 11.6 | 2.41E-20 |
| IPI00880176 | NA                                                                                                 |          |      |      | 0.95 | 0.95 |      | 1  | 16.7 | 1.52E-07 |
| IPI00880178 | Hematopoietic signal peptide-containing membrane domain-containing protein 1                       | Q5UCC4-3 |      | 1.16 |      | 1.16 |      | 2  | 6.7  | 0.000745 |

|             |                                                                                                                     |          |      |      |      |      |      |    |      |          |
|-------------|---------------------------------------------------------------------------------------------------------------------|----------|------|------|------|------|------|----|------|----------|
| IPI00883647 | cDNA, FLJ92684, highly similar to Homo sapiens IK cytokine, down-regulator of HLA II (IK), mRNA                     | B2R5Y4   | 1.61 | 1.19 | 1.24 | 1.34 | 0.23 | 7  | 17.4 | 5.35E-43 |
| IPI00883857 | Heterogeneous nuclear ribonucleoprotein U                                                                           | Q00839-1 | 0.99 | 1.02 | 1.02 | 1.01 | 0.02 | 45 | 46.7 | 0        |
| IPI00883896 | Epithelial protein lost in neoplasm beta variant                                                                    | Q53GG0   | 0.95 |      | 1.05 | 1.00 | 0.07 | 24 | 42.5 | 0        |
| IPI00883897 | RELA protein                                                                                                        | Q2TAM5   | 1.02 | 1.12 | 1.10 | 1.08 | 0.05 | 9  | 26.3 | 5.23E-64 |
| IPI00883925 | FLJ00169 protein                                                                                                    | Q8TEM4   | 1.02 | 1.07 | 1.17 | 1.09 | 0.08 | 3  | 11.5 | 2.84E-80 |
| IPI00884061 | NA                                                                                                                  |          |      | 1.22 |      | 1.22 |      | 2  | 30.9 | 5.01E-57 |
| IPI00884105 | CD107 antigen-like family member A                                                                                  | P11279   | 1.28 | 1.01 | 1.44 | 1.24 | 0.21 | 4  | 9.8  | 6.9E-113 |
| IPI00884192 | Glutathione peroxidase 4                                                                                            | P36969-1 | 0.85 | 0.57 | 0.48 | 0.64 | 0.20 | 4  | 21.4 | 1.47E-16 |
| IPI00884896 | Gene associated with retinoic and interferon-induced mortality 12 protein                                           | Q16881-1 | 0.63 | 0.86 | 1.00 | 0.83 | 0.19 | 22 | 49.9 | 0        |
| IPI00885108 | PAT1-like protein 1                                                                                                 | Q86TB9-1 | 1.19 | 1.22 | 1.15 | 1.18 | 0.03 | 7  | 13.6 | 1.6E-107 |
| IPI00885123 | SH3 domain-containing guanine exchange factor                                                                       | Q96DR7-3 |      | 0.97 |      | 0.97 |      | 2  | 5.4  | 0.009854 |
| IPI00886911 | NA                                                                                                                  |          | 0.84 | 0.97 | 1.04 | 0.95 | 0.10 | 3  | 5.6  | 2.18E-89 |
| IPI00887558 | NA                                                                                                                  |          |      | 0.78 |      | 0.78 |      | 1  | 5.9  | 0.010054 |
| IPI00889000 | Neurochondrin                                                                                                       | Q9UBB6-3 |      | 0.95 | 1.17 | 1.06 | 0.15 | 3  | 5.3  | 3.2E-08  |
| IPI00889534 | Carbamoylphosphate synthetase I                                                                                     | Q5R206   |      |      | 1.03 | 1.03 |      | 2  | 1.7  | 2.96E-31 |
| IPI00890743 | Serine/threonine-protein phosphatase                                                                                | B7Z2W9   | 0.83 | 1.12 | 1.04 | 1.00 | 0.15 | 8  | 29.2 | 3.8E-121 |
| IPI00890837 | Structural maintenance of chromosomes flexible hinge domain-containing protein 1                                    | A6NHR9-1 | 0.91 | 1.08 | 1.03 | 1.01 | 0.08 | 15 | 10.2 | 2.3E-125 |
| IPI00892541 | HLA-B associated transcript 3                                                                                       | B0UX85   | 1.13 | 1.29 | 1.12 | 1.18 | 0.10 | 7  | 14.3 | 2.56E-73 |
| IPI00893004 | Major histocompatibility complex, class I, C                                                                        | B0S7Z6   | 0.86 | 1.55 | 1.57 | 1.33 | 0.40 | 9  | 28.2 | 3.8E-159 |
| IPI00893197 | Phosphotyrosyl phosphatase activator                                                                                | Q15257-2 | 1.18 | 1.17 | 1.07 | 1.14 | 0.06 | 7  | 28.4 | 2.07E-47 |
| IPI00893532 | von Willebrand factor A domain-containing protein 3B                                                                | Q502W6-6 | 0.88 |      |      | 0.88 |      | 1  | 0.8  | 0.004303 |
| IPI00893541 | 14 kDa protein                                                                                                      | C9JKU1   | 1.04 | 1.07 | 1.08 | 1.06 | 0.02 | 8  | 69.9 | 3.2E-252 |
| IPI00893746 | NHP2 non-histone chromosome protein 2-like 1 ( <i>S. cerevisiae</i> )                                               | B1AHD1   | 0.73 | 0.95 | 0.88 | 0.86 | 0.12 | 6  | 39.4 | 1.1E-106 |
| IPI00893770 | cDNA FLJ46786 fis, clone TRACH3028837, highly similar to Homo sapiens smoothelin (SMTN), transcript variant 2, mRNA | B3KY41   | 0.68 |      | 0.92 | 0.80 | 0.18 | 15 | 18.6 | 9E-143   |
| IPI00893918 | Valyl-tRNA synthetase                                                                                               | B0V043   | 0.95 | 0.88 | 0.90 | 0.91 | 0.03 | 42 | 39.6 | 0        |
| IPI00893949 | MHC class I antigen                                                                                                 | A0N0E2   | 1.12 | 1.46 | 1.76 | 1.45 | 0.32 | 12 | 44.2 | 0        |
| IPI00894154 | Complex I-42kD                                                                                                      | O95299   |      | 0.92 | 0.96 | 0.94 | 0.03 | 7  | 17.7 | 1.5E-112 |

|             |                                                                                                                                       |          |      |      |      |      |      |     |      |          |
|-------------|---------------------------------------------------------------------------------------------------------------------------------------|----------|------|------|------|------|------|-----|------|----------|
| IPI00894287 | cDNA FLJ56889, moderately similar to Vigilin                                                                                          | B4DTQ2   | 0.73 | 1.06 | 0.91 | 0.90 | 0.16 | 32  | 32.7 | 0        |
| IPI00894395 | Low molecular mass protein 2                                                                                                          | B0V0T1   |      | 1.27 |      | 1.27 |      | 2   | 8.7  | 0.000426 |
| IPI00894409 | Copine I                                                                                                                              | B0QZ18   | 1.10 | 1.33 | 1.32 | 1.25 | 0.13 | 14  | 29.2 | 1.1E-210 |
| IPI00894498 | Beta-actin                                                                                                                            | A1E282   | 0.91 |      |      | 0.91 |      | 36  | 79.5 | 0        |
| IPI00895781 | GC-rich promoter-binding protein 1                                                                                                    | Q86WP2-2 |      | 1.06 |      | 1.06 |      | 1   | 2.4  | 0.000683 |
| IPI00895800 | HBEBP2-binding protein C                                                                                                              | Q27J81-1 | 1.05 | 1.18 | 1.26 | 1.16 | 0.11 | 3   | 4.8  | 8.32E-23 |
| IPI00895911 | Cellular nucleic acid binding protein alpha variant 1                                                                                 | Q5U0E9   | 0.92 | 0.98 | 0.89 | 0.93 | 0.04 | 11  | 57.3 | 0        |
| IPI00896498 | cDNA, FLJ93047, highly similar to Homo sapiens matrix metalloproteinase 14 (membrane-inserted) (MMP14), mRNA                          | B2R6P3   | 1.55 | 1.86 | 2.05 | 1.82 | 0.25 | 2   | 3.8  | 9.24E-05 |
| IPI00896504 | Glucosamine (UDP-N-acetyl)-2-epimerase/N-acetylmannosamine kinase, isoform CRA_a                                                      | A6PZH2   |      | 1.43 | 1.25 | 1.34 | 0.13 | 5   | 9.7  | 1.35E-71 |
| IPI00900291 | cDNA, FLJ93859, highly similar to Homo sapiens protein phosphatase 1A (formerly 2C), magnesium-dependent, alpha isoform (PPM1A), mRNA | B2R8E4   | 0.96 |      | 1.63 | 1.30 | 0.47 | 3   | 7.3  | 2.36E-06 |
| IPI00900293 | Filamin B                                                                                                                             | B2ZZ83   | 0.91 | 0.92 | 0.96 | 0.93 | 0.03 | 125 | 61.3 | 0        |
| IPI00900312 | Proto-oncogene c-RAF                                                                                                                  | P04049-2 | 0.90 | 1.11 | 1.07 | 1.03 | 0.11 | 8   | 19.9 | 3.17E-25 |
| IPI00900386 | Putative uncharacterized protein GTPBP3                                                                                               | A6NFH1   |      |      | 0.58 | 0.58 |      | 1   | 4.4  | 1.04E-39 |
| IPI00902451 | Ser/thr protein kinase Emk1/MARK2 isoform EMK1A                                                                                       | Q5DNC6   |      | 1.02 |      | 1.02 |      | 6   | 13.3 | 7.55E-39 |
| IPI00902533 | Nuclear envelope pore membrane protein POM 121                                                                                        | Q96HA1-1 | 1.28 | 0.61 |      | 0.95 | 0.47 | 2   | 2.9  | 6.67E-09 |
| IPI00902560 | Outer mitochondrial membrane protein porin 2                                                                                          | P45880-1 | 0.89 | 0.99 | 1.12 | 1.00 | 0.11 | 12  | 50.2 | 5.6E-172 |
| IPI00902564 | 65 kDa eukaryotic translation initiation factor 2A                                                                                    | Q9BY44-1 |      | 0.93 | 0.90 | 0.91 | 0.02 | 19  | 45.8 | 9.9E-142 |
| IPI00902588 | cDNA FLJ38699 fis, clone KIDNE2002168, highly similar to Short chain 3-hydroxyacyl-CoA dehydrogenase, mitochondrial (EC 1.1.1.35)     | B3KTT6   |      | 1.09 | 1.15 | 1.12 | 0.05 | 9   | 24.2 | 7.97E-37 |
| IPI00902614 | Deubiquitinating enzyme 24                                                                                                            | Q9UPU5   | 1.21 | 1.08 | 1.04 | 1.11 | 0.09 | 3   | 1.7  | 1.91E-34 |
| IPI00902680 | cDNA FLJ39696 fis, clone SMINT2011033, highly similar to Sorting and assembly machinery component 50 homolog                          | B3KUE6   | 0.91 |      |      | 0.91 |      | 3   | 10.9 | 1.98E-14 |
| IPI00902843 | cDNA FLJ16129 fis, clone BRACE2039823, highly similar to CDP-diacylglycerol--inositol3-phosphatidyltransferase (EC 2.7.8.11)          | B3KY94   |      | 1.38 |      | 1.38 |      | 1   | 4.6  | 0.000422 |



|             |                                                                                       |          |      |      |      |      |      |    |      |          |
|-------------|---------------------------------------------------------------------------------------|----------|------|------|------|------|------|----|------|----------|
| IPI00902969 | Augmenter of liver regeneration                                                       | P55789   | 0.99 | 0.79 | 0.80 | 0.86 | 0.11 | 3  | 24.9 | 1.5E-99  |
| IPI00902991 | BetaCstF-64 variant 2                                                                 | B3V096   | 1.09 | 1.21 | 0.99 | 1.10 | 0.11 | 8  | 18.4 | 7.93E-49 |
| IPI00903155 | cDNA FLJ39540 fis, clone PUAEN2008314, highly similar to Switch-associated protein 70 | B3KUB9   | 1.11 | 0.93 | 1.05 | 1.03 | 0.09 | 11 | 25.6 | 3.03E-52 |
| IPI00903226 | cDNA FLJ46359 fis, clone TESTI4049786, highly similar to Hexokinase-1 (EC 2.7.1.1)    | B3KXY9   | 0.90 | 0.89 | 0.97 | 0.92 | 0.04 | 14 | 14.6 | 2.01E-69 |
| IPI00903253 | cDNA FLJ44718 fis, clone BRACE3022051                                                 | Q6ZRD3   | 1.15 | 0.95 | 0.88 | 0.99 | 0.14 | 2  | 22.3 | 3.63E-42 |
| IPI00903256 | Putative uncharacterized protein ZC3H14                                               | B5MBX9   | 1.31 | 1.02 | 1.00 | 1.11 | 0.17 | 6  | 11.8 | 1.96E-61 |
| IPI00903320 | cDNA FLJ36571 fis, clone TRACH2012242, highly similar to Myoferlin                    | B3KSL7   |      | 1.38 | 1.21 | 1.29 | 0.12 | 4  | 26.3 | 3.87E-37 |
| IPI00903328 | cDNA FLJ40132 fis, clone TESTI2012155, highly similar to NUCLEOPORIN-LIKE PROTEIN RIP | B3KUL1   | 0.92 | 0.96 | 0.98 | 0.95 | 0.03 | 4  | 12   | 2.14E-51 |
| IPI00908375 | cDNA FLJ52821, highly similar to Protein transport protein Sec23A                     | B4E0Q9   |      |      | 0.93 | 0.93 |      | 12 | 38.1 | 1.4E-181 |
| IPI00908404 | cDNA FLJ51188, highly similar to N-acetylglucosamine-6-sulfatase (EC3.1.6.14)         | B4E284   | 1.26 | 1.15 | 1.17 | 1.19 | 0.06 | 10 | 23.3 | 4.04E-47 |
| IPI00908416 | cDNA FLJ55157, highly similar to Eukaryotic translation initiation factor 4E          | A8MX72   | 0.94 | 0.98 | 0.98 | 0.97 | 0.02 | 4  | 20.6 | 1.03E-67 |
| IPI00908444 | Calcium/calmodulin-dependent protein kinase type II subunit gamma                     | Q13555-6 |      |      | 1.36 | 1.36 |      | 5  | 13.3 | 3.28E-95 |
| IPI00908461 | cDNA FLJ52942, highly similar to Nucleolar protein of 40 kDa                          | B4DYA9   | 1.03 |      |      | 1.03 |      | 2  | 9.1  | 2.27E-23 |
| IPI00908469 | cDNA FLJ52712, highly similar to Tubulin beta-6 chain                                 | B4DP54   | 0.92 | 0.97 | 1.05 | 0.98 | 0.06 | 23 | 60.5 | 0        |
| IPI00908538 | cDNA FLJ54293                                                                         | B4E3J6   |      | 1.02 |      | 1.02 |      | 3  | 11.7 | 0.002513 |
| IPI00908568 | Replication factor C 5 isoform 3                                                      |          | 1.11 |      |      | 1.11 |      | 8  | 37.6 | 2.51E-90 |
| IPI00908578 | cDNA FLJ51932                                                                         | B4DQ06   |      |      | 1.05 | 1.05 |      | 2  | 18.4 | 1.03E-05 |
| IPI00908639 | cDNA FLJ61589                                                                         | B4DGV1   | 1.14 | 1.19 |      | 1.17 | 0.04 | 3  | 3.8  | 5.39E-42 |
| IPI00908736 | Putative uncharacterized protein YAF2                                                 | C9JKP3   | 0.92 | 0.96 | 0.86 | 0.91 | 0.05 | 4  | 28.9 | 8.04E-95 |
| IPI00908804 | cDNA FLJ53353, highly similar to ATP-binding cassette sub-family D member 3           | B4DL07   | 0.85 | 1.22 |      | 1.03 | 0.26 | 7  | 12.7 | 1.67E-64 |
| IPI00908873 | 140 kDa nucleolar phosphoprotein                                                      | Q14978-3 |      |      | 0.81 | 0.81 |      | 7  | 12.3 | 2.78E-10 |
| IPI00908913 | cDNA FLJ61582, highly similar to RNA-binding protein with multiple splicing           | B4E3T4   | 0.79 | 1.21 | 1.16 | 1.05 | 0.23 | 4  | 28.6 | 1.08E-77 |
| IPI00908931 | cDNA FLJ52456, moderately similar to Programmed cell death protein 5                  | B4DE64   | 0.87 |      |      | 0.87 |      | 4  | 32.6 | 7.2E-120 |
| IPI00909064 | Bifunctional coenzyme A synthase                                                      | Q13057-2 | 0.91 | 1.18 | 1.02 | 1.04 | 0.14 | 9  | 19.6 | 1.63E-65 |

|             |                                                                                                         |          |      |      |      |      |      |    |      |          |
|-------------|---------------------------------------------------------------------------------------------------------|----------|------|------|------|------|------|----|------|----------|
| IPI00909083 | GSPT1 protein                                                                                           | Q96GF2   | 0.94 | 1.07 | 0.99 | 1.00 | 0.07 | 16 | 28.5 | 3.6E-117 |
| IPI00909112 | cDNA FLJ59570, highly similar to Protein farnesyltransferase subunit beta (EC 2.5.1.58)                 | B4DL54   | 1.02 |      |      | 1.02 |      | 3  | 9.8  | 8.66E-16 |
| IPI00909195 | cDNA FLJ53622, highly similar to Hematological and neurological expressed1-like protein                 | B4DLH4   | 1.34 | 1.09 | 0.96 | 1.13 | 0.20 | 10 | 60.1 | 6.7E-130 |
| IPI00909247 | cDNA FLJ51655, highly similar to Actin-like protein 2                                                   | B4DWQ5   | 0.74 |      |      | 0.74 |      | 10 | 29.2 | 2.2E-227 |
| IPI00909366 | cDNA FLJ60058, highly similar to Myosin light chain 1, slow-twitch muscle A isoform                     | B4E368   | 3.41 |      | 0.88 | 2.14 | 1.79 | 6  | 26.9 | 2.8E-138 |
| IPI00909484 | cDNA FLJ54776, highly similar to Cell division control protein 42 homolog                               | B4E1U9   | 0.92 | 1.15 | 1.09 | 1.05 | 0.12 | 8  | 30.9 | 5.99E-70 |
| IPI00909515 | cDNA FLJ51495, highly similar to ADP-ribosylation factor 5                                              | B4DLJ3   |      |      | 1.29 | 1.29 |      | 4  | 22.7 | 2.73E-87 |
| IPI00909555 | cDNA FLJ51602, highly similar to Interferon-induced guanylate-binding protein 1                         | B4DNS2   | 0.82 |      | 1.26 | 1.04 | 0.31 | 12 | 31.9 | 2.46E-82 |
| IPI00909569 | Histone deacetylase 7                                                                                   | Q8WUI4-8 | 0.85 | 0.95 |      | 0.90 | 0.07 | 5  | 7.7  | 3.15E-09 |
| IPI00909703 | cDNA FLJ51518, highly similar to Annexin A11                                                            | B4DPJ2   |      | 1.15 | 1.16 | 1.16 | 0.01 | 14 | 32.3 | 1.1E-205 |
| IPI00909772 | cDNA FLJ53069, highly similar to AP-2 complex subunit mu-1                                              | B4DNB9   | 0.97 |      |      | 0.97 |      | 10 | 25   | 5.78E-69 |
| IPI00909773 | Ubiquitin carrier protein                                                                               | B4DSZ4   | 1.15 |      |      | 1.15 |      | 6  | 28.8 | 3.92E-56 |
| IPI00909853 | cDNA FLJ59607, moderately similar to D-dopachrome decarboxylase (EC 4.1.1.84)                           | B4E259   | 0.93 |      |      | 0.93 |      | 3  | 15.4 | 5.29E-57 |
| IPI00909904 | Mammalian STE20-like protein kinase 3                                                                   | Q9Y6E0-2 | 1.11 | 1.17 | 1.01 | 1.10 | 0.08 | 8  | 19.6 | 3E-182   |
| IPI00910016 | cDNA FLJ75178, highly similar to Homo sapiens methyl-CpG binding protein splice variant 1 (MBD1) mRNA   | A8K654   |      |      | 1.14 | 1.14 |      | 2  | 5.9  | 3.32E-06 |
| IPI00910034 | cDNA FLJ51105, highly similar to Arfaptin-2                                                             | B4DUZ3   | 0.96 | 1.30 | 0.97 | 1.08 | 0.19 | 4  | 14.4 | 2.19E-36 |
| IPI00910088 | cDNA FLJ14622 fis, clone NT2RP2000147, highly similar to Adaptor-related protein complex 1 mu-1 subunit | B3KNH5   | 1.04 | 1.08 | 1.12 | 1.08 | 0.04 | 9  | 28.3 | 1.01E-69 |
| IPI00910135 | cDNA FLJ56849, moderately similar to Mus musculus actin filament associated protein 1 (Afap1), mRNA     | B4DMU2   | 0.81 |      | 1.25 | 1.03 | 0.31 | 3  | 4.4  | 1.29E-05 |
| IPI00910164 | cDNA FLJ53381, highly similar to Monocarboxylate transporter 1                                          | B4DKS0   | 0.90 | 0.67 | 0.97 | 0.85 | 0.16 | 5  | 11.7 | 4.48E-44 |
| IPI00910194 | cDNA FLJ60565, highly similar to Nuclear pore complex protein Nup153                                    | B4DIK2   | 1.03 | 1.11 | 1.08 | 1.07 | 0.04 | 17 | 17.6 | 3.4E-250 |
| IPI00910365 | cDNA FLJ53237, highly similar to Caseinolytic peptidase B protein                                       | B4DXP7   | 0.99 |      |      | 0.99 |      | 5  | 11   | 2.05E-26 |

|             |                                                                                                                                           |          |      |      |      |      |      |    |      |          |
|-------------|-------------------------------------------------------------------------------------------------------------------------------------------|----------|------|------|------|------|------|----|------|----------|
| IPI00910443 | cDNA FLJ61695, highly similar to Glioma tumor suppressor candidate region gene 2 protein                                                  | B4E1N4   | 1.42 | 0.90 | 0.86 | 1.06 | 0.31 | 7  | 19.5 | 7.11E-62 |
| IPI00910572 | cDNA FLJ60673, highly similar to Homo sapiens aldehyde dehydrogenase 16 family, member A1 (ALDH16A1), mRNA                                | B4DLQ1   | 0.99 |      |      | 0.99 |      | 5  | 9.5  | 8.13E-48 |
| IPI00910581 | cDNA FLJ57960                                                                                                                             | B4DF33   | 1.44 |      | 0.98 | 1.21 | 0.32 | 3  | 11   | 3.09E-05 |
| IPI00910593 | cDNA FLJ52765, highly similar to Calponin-2                                                                                               | B4DUT8   | 0.76 | 1.08 | 1.02 | 0.96 | 0.17 | 17 | 56.1 | 0        |
| IPI00910610 | NEDD8 carrier protein UBE2F                                                                                                               | Q969M7-2 | 1.22 | 1.17 |      | 1.20 | 0.03 | 2  | 12.8 | 5.47E-28 |
| IPI00910694 | cDNA FLJ58598, highly similar to Homo sapiens NOL1/NOP2/Sun domain family, member 5 (NSUN5), transcript variant 1, mRNA                   | B4DP79   | 0.72 | 0.93 | 0.86 | 0.83 | 0.11 | 3  | 8.5  | 5.73E-12 |
| IPI00910781 | Glucose-6-phosphate isomerase                                                                                                             | B4DE36   | 1.05 | 1.06 | 0.99 | 1.03 | 0.04 | 29 | 43.8 | 0        |
| IPI00910882 | Putative uncharacterized protein TBC1D5                                                                                                   | C9JP52   | 1.02 | 1.15 | 1.10 | 1.09 | 0.06 | 4  | 6.9  | 4.16E-26 |
| IPI00910937 | cDNA FLJ54803, highly similar to Cyclin-dependent kinase inhibitor 1                                                                      | B4DQP9   | 1.07 |      | 1.35 | 1.21 | 0.20 | 2  | 15.2 | 1.29E-75 |
| IPI00910974 | Phosphoglycerate kinase                                                                                                                   | B4DWQ3   |      | 1.02 | 1.04 | 1.03 | 0.01 | 16 | 97.5 | 0        |
| IPI00910977 | cDNA FLJ31171 fis, clone KIDNE2000046, highly similar to 3-mercaptopyruvate sulfurtransferase                                             | B3KP52   | 1.13 | 0.94 | 1.01 | 1.03 | 0.10 | 8  | 34.7 | 2E-110   |
| IPI00911039 | cDNA FLJ38698 fis, clone KIDNE2002015, highly similar to HEAT SHOCK 70 kDa PROTEIN 1                                                      | B3KTT5   | 1.02 | 1.00 | 1.01 | 1.01 | 0.01 | 35 | 55.5 | 0        |
| IPI00911050 | cDNA FLJ53329, highly similar to NADPH:adrenodoxin oxidoreductase, mitochondrial (EC 1.18.1.2)                                            | B4DHX5   |      | 1.64 |      | 1.64 |      | 1  | 2.4  | 0.003353 |
| IPI00911064 | cDNA FLJ58961, highly similar to APAF1-interacting protein                                                                                | A8MWRO   | 1.18 |      | 1.07 | 1.13 | 0.08 | 3  | 18.1 | 2.04E-08 |
| IPI00913848 | cDNA FLJ77570, highly similar to Homo sapiens pleckstrin homology domain containing, family C (with FERM domain) member 1 (PLEKHC1), mRNA | A8K6S3   | 0.65 | 0.87 | 0.88 | 0.80 | 0.13 | 26 | 52.3 | 1.9E-263 |
| IPI00913889 | Haloacid dehalogenase-like hydrolase domain-containing protein 1A                                                                         | Q08623   | 1.23 | 1.02 | 0.98 | 1.08 | 0.13 | 4  | 15.1 | 6.77E-87 |
| IPI00913938 | cDNA FLJ59791, highly similar to Importin-11                                                                                              | B4DZ73   | 0.93 | 0.71 | 0.89 | 0.84 | 0.12 | 6  | 10   | 1.57E-12 |
| IPI00913961 | Histone H2A.Z                                                                                                                             | P0C0S5   | 1.35 | 1.09 | 1.13 | 1.19 | 0.14 | 4  | 22.1 | 1.14E-24 |
| IPI00914016 | Dynactin subunit 4                                                                                                                        | Q9UJW0   | 1.24 | 1.11 | 1.17 | 1.17 | 0.06 | 7  | 22.9 | 1.03E-53 |
| IPI00914045 | Small integral membrane protein 13                                                                                                        |          |      | 2.55 |      | 2.55 |      | 2  | 13.2 | 8.16E-07 |
| IPI00914048 | Basophilic leukemia-expressed protein Bles03                                                                                              | Q9H3H3   | 1.04 | 1.13 | 1.18 | 1.11 | 0.07 | 5  | 18.8 | 7.66E-28 |

|             |                                                                                                       |          |      |      |      |      |      |    |      |          |
|-------------|-------------------------------------------------------------------------------------------------------|----------|------|------|------|------|------|----|------|----------|
| IPI00914566 | Farnesyl diphosphate synthetase                                                                       | P14324   | 1.91 | 2.06 | 2.14 | 2.04 | 0.11 | 8  | 21   | 2.74E-55 |
| IPI00914847 | Nebulin                                                                                               | A8MTT4   | 1.09 | 0.98 | 1.12 | 1.06 | 0.08 | 2  | 0.4  | 0.009732 |
| IPI00914938 | 100 kDa coated vesicle protein C                                                                      | O94973-1 |      |      | 1.00 | 1.00 |      | 18 | 24.2 | 8.7E-203 |
| IPI00914949 | Spectrin, beta, erythrocytic (Includes spherocytosis, clinical type I) variant                        | Q59FP5   |      |      | 0.97 | 0.97 |      | 7  | 2.5  | 2.14E-11 |
| IPI00915008 | Methyltransferase-like protein 1                                                                      | Q9UBP6   | 0.80 | 0.92 | 0.83 | 0.85 | 0.06 | 8  | 30.6 | 2.07E-72 |
| IPI00915022 | hTREN120                                                                                              | Q8NI27-1 | 0.75 | 1.05 | 0.92 | 0.91 | 0.15 | 4  | 2.5  | 6.66E-10 |
| IPI00915356 | Cleavage and polyadenylation specificity factor 59 kDa subunit                                        | Q8N684-1 | 1.14 | 1.55 | 1.27 | 1.32 | 0.21 | 7  | 17.7 | 3.36E-14 |
| IPI00915363 | 40S ribosomal protein S24                                                                             | P62847-1 | 0.94 | 0.84 | 0.89 | 0.89 | 0.05 | 4  | 12.1 | 8.91E-75 |
| IPI00915437 | Aicardi-Goutieres syndrome 2 protein                                                                  | Q5TBB1   | 0.82 |      |      | 0.82 |      | 2  | 13.2 | 0.001792 |
| IPI00915456 | cDNA FLJ77778, highly similar to Homo sapiens death-associated protein 6 (DAXX), mRNA                 | A8K822   |      | 1.17 |      | 1.17 |      | 2  | 4.5  | 9.51E-05 |
| IPI00915466 | EPS-15-interacting protein 2                                                                          | O95208-1 |      | 1.21 |      | 1.21 |      | 3  | 6.1  | 1.25E-10 |
| IPI00916111 | Cytosolic malate dehydrogenase                                                                        | P40925   | 1.02 | 1.18 | 1.13 | 1.11 | 0.08 | 14 | 44.3 | 0        |
| IPI00916402 | Adaptor-associated kinase 1                                                                           | Q2M2I8   | 1.21 | 1.09 | 0.98 | 1.09 | 0.12 | 6  | 14.8 | 1.3E-75  |
| IPI00916405 | Putative uncharacterized protein ENSP00000387259                                                      | B8ZU2    |      |      | 0.96 | 0.96 |      | 11 | 17.8 | 7.3E-132 |
| IPI00916503 | cDNA FLJ55789, highly similar to Rattus norvegicus basic leucine zipper and W2 domains 1 (Bzw1), mRNA | B4DLZ8   | 1.02 | 1.07 | 1.19 | 1.09 | 0.09 | 16 | 31   | 4.2E-105 |
| IPI00916546 | Putative uncharacterized protein PWP2                                                                 | C9JC91   | 0.92 |      | 1.23 | 1.07 | 0.21 | 3  | 22   | 1.04E-32 |
| IPI00916570 | Secretory carrier-associated membrane protein 4                                                       | C9JXD3   | 0.97 | 0.84 | 1.08 | 0.96 | 0.12 | 1  | 4.6  | 5.09E-14 |
| IPI00916600 | cDNA FLJ75174, highly similar to Homo sapiens calmodulin 1 (phosphorylase kinase, delta), mRNA        | A8K1M2   | 1.28 | 1.06 | 1.06 | 1.14 | 0.12 | 7  | 36.2 | 0        |
| IPI00916847 | GTP-binding protein 9                                                                                 | Q9NTK5-1 | 0.97 | 0.97 | 0.97 | 0.97 | 0.00 | 21 | 50.7 | 1.9E-250 |
| IPI00917041 | Putative uncharacterized protein METTL5                                                               | B8ZC8    | 0.58 | 0.66 | 0.59 | 0.61 | 0.04 | 2  | 10.2 | 7.62E-07 |
| IPI00917072 | Putative uncharacterized protein RABL2A                                                               | B7ZBD6   |      | 1.01 | 1.05 | 1.03 | 0.03 | 3  | 18.1 | 2.77E-51 |
| IPI00917081 | ANO6 protein                                                                                          | B9EGG0   |      | 1.03 |      | 1.03 |      | 3  | 5.6  | 6.71E-22 |
| IPI00917228 | Putative uncharacterized protein PTMA                                                                 | C9J0D0   | 1.33 | 0.95 | 0.92 | 1.07 | 0.23 | 8  | 22.3 | 0        |
| IPI00917297 | Putative uncharacterized protein CWC22                                                                | B7WP27   | 1.05 | 0.95 | 1.04 | 1.01 | 0.06 | 6  | 8.3  | 5.4E-38  |
| IPI00917298 | cDNA FLJ57527, highly similar to 60S ribosomal protein L31                                            | B7Z4C8   | 0.99 | 0.90 |      | 0.95 | 0.06 | 4  | 26.2 | 1.13E-24 |

|             |                                                                                                 |          |      |      |      |      |      |    |      |          |
|-------------|-------------------------------------------------------------------------------------------------|----------|------|------|------|------|------|----|------|----------|
| IPI00917656 | Putative uncharacterized protein FAM128B                                                        | B8ZZ87   | 1.06 |      | 1.17 | 1.12 | 0.08 | 2  | 16.5 | 2.5E-96  |
| IPI00917683 | Putative uncharacterized protein SUMO1                                                          | B8ZZN6   | 1.21 | 1.25 | 1.06 | 1.17 | 0.10 | 2  | 13   | 9.66E-06 |
| IPI00918021 | Ubiquitin carrier protein                                                                       | B8ZZC0   | 1.37 | 1.43 | 1.13 | 1.31 | 0.16 | 7  | 30.6 | 4.4E-170 |
| IPI00921172 | Peroxisomal carnitine O-octanoyltransferase                                                     | Q9UKG9   |      |      | 1.45 | 1.45 |      | 2  | 5.8  | 1.2E-28  |
| IPI00921422 | Colonic and hepatic tumor over-expressed gene protein                                           | Q14008-3 | 0.90 | 1.01 | 0.97 | 0.96 | 0.06 | 33 | 20.9 | 1E-165   |
| IPI00921428 | cDNA FLJ54837, highly similar to Inositol monophosphatase (EC 3.1.3.25)                         | B7Z6Q4   | 0.85 | 1.06 | 1.08 | 1.00 | 0.13 | 10 | 33.9 | 8.4E-92  |
| IPI00921819 | cDNA FLJ56007, highly similar to Cip1-interacting zinc finger protein                           | B7Z3U7   |      | 0.98 | 1.06 | 1.02 | 0.06 | 3  | 6.7  | 2.25E-39 |
| IPI00921844 | MAD3/BUB1-related protein kinase                                                                | O60566-3 | 0.69 | 1.18 | 0.96 | 0.94 | 0.24 | 9  | 10.6 | 4.32E-49 |
| IPI00921909 | Zinc finger protein 185 variant 721                                                             | B8K2M1   |      | 1.48 |      | 1.48 |      | 7  | 17.9 | 8.94E-52 |
| IPI00921911 | cDNA FLJ56946, highly similar to Cysteine-rich protein 2                                        | B7Z6C0   | 1.14 | 1.18 | 1.16 | 1.16 | 0.02 | 5  | 28.4 | 3E-216   |
| IPI00922006 | Adapter-related protein complex 1 sigma-1B subunit                                              | P56377   | 1.13 |      | 1.10 | 1.12 | 0.02 | 3  | 21.7 | 1.1E-104 |
| IPI00922055 | Diazepam binding inhibitor, splice form 1G                                                      | B8ZWD6   | 1.32 | 1.21 | 1.19 | 1.24 | 0.07 | 5  | 38.5 | 1.87E-57 |
| IPI00922070 | cDNA FLJ57025, highly similar to Ceroid-lipofuscinosis neuronal protein 6                       | B4DDH6   | 0.72 | 0.84 |      | 0.78 | 0.09 | 1  | 3.2  | 3.28E-09 |
| IPI00922181 | cDNA FLJ53276, moderately similar to DNA replication licensing factor MCM2                      | B7Z8Z6   | 1.13 | 1.17 | 1.15 | 1.15 | 0.02 | 34 | 40.6 | 0        |
| IPI00922223 | cDNA FLJ54755, highly similar to Vacuolar ATP synthase subunit d (EC 3.6.3.14)                  | B7Z6L9   | 0.95 | 1.15 | 1.27 | 1.12 | 0.16 | 8  | 19.1 | 5.83E-57 |
| IPI00922250 | Putative overexpressed in colon carcinoma 1 protein                                             | Q8TAD7   | 0.62 |      | 0.88 | 0.75 | 0.19 | 3  | 55.6 | 6.1E-60  |
| IPI00922383 | cDNA FLJ57430, highly similar to DNA-directed RNA polymerase II 33 kDa polypeptide (EC 2.7.7.6) | B7Z6D1   |      |      | 1.08 | 1.08 |      | 5  | 14.9 | 1.17E-78 |
| IPI00922413 | cDNA FLJ61560, highly similar to Tight junction protein ZO-2                                    | B7Z954   | 0.97 | 1.04 | 1.04 | 1.02 | 0.04 | 8  | 12.1 | 3.2E-177 |
| IPI00922415 | cDNA FLJ51825, highly similar to Single-stranded DNA-binding protein, mitochondrial             | B7Z268   |      |      | 1.21 | 1.21 |      | 6  | 40.9 | 1.7E-154 |
| IPI00922428 | cDNA FLJ51089, highly similar to FK506-binding protein 9 (EC 5.2.1.8)                           | B7Z6H3   | 1.15 | 1.27 | 1.27 | 1.23 | 0.07 | 5  | 7.5  | 7.13E-12 |
| IPI00922443 | cDNA FLJ59210, highly similar to Tubulin-specific chaperone E                                   | B7Z3P1   | 1.05 | 1.11 | 0.97 | 1.04 | 0.07 | 12 | 26.8 | 1.91E-82 |
| IPI00922476 | EVPL protein                                                                                    | B7ZLH8   | 0.83 | 1.12 |      | 0.98 | 0.20 | 2  | 1.4  | 0.003419 |
| IPI00922484 | BUD31 homolog (Yeast), isoform CRA_b                                                            | B7Z4S9   | 0.70 |      | 0.99 | 0.85 | 0.20 | 10 | 60   | 1.9E-36  |

|             |                                                                                                                      |          |      |      |      |      |      |    |      |          |
|-------------|----------------------------------------------------------------------------------------------------------------------|----------|------|------|------|------|------|----|------|----------|
| IPI00922513 | cDNA FLJ57872, highly similar to Mevalonate kinase (EC 2.7.1.36)                                                     | B7Z1C2   | 1.74 | 2.06 |      | 1.90 | 0.22 | 5  | 25.6 | 1.44E-16 |
| IPI00922574 | cDNA FLJ58752, highly similar to Homo sapiens RCD1 required for cell differentiation 1 homolog (RQCD1), mRNA         | B7Z1E5   | 0.85 |      |      | 0.85 |      | 4  | 13   | 1.02E-20 |
| IPI00922682 | cDNA FLJ54713, highly similar to Gephyrin                                                                            | B7Z2B5   |      | 0.89 | 0.83 | 0.86 | 0.05 | 6  | 10.1 | 6.38E-24 |
| IPI00922697 | PDHE1-A type I                                                                                                       | P08559   |      | 1.05 |      | 1.05 |      | 17 | 42.8 | 3.59E-83 |
| IPI00922773 | cDNA FLJ58031, highly similar to Tuftelin                                                                            | B7Z4Y1   | 0.73 | 1.17 | 1.13 | 1.01 | 0.24 | 2  | 5.1  | 1.19E-24 |
| IPI00922855 | TUBGCP2 protein                                                                                                      | B7ZKL8   |      | 1.24 | 1.35 | 1.30 | 0.08 | 4  | 5.3  | 7.15E-34 |
| IPI00923468 | SMARCA4 protein                                                                                                      | B9EGQ8   | 1.01 | 0.93 | 1.01 | 0.98 | 0.05 | 11 | 8.3  | 1.2E-175 |
| IPI00923582 | cDNA FLJ59687, highly similar to Secernin-1                                                                          | B4DHM0   | 1.02 | 1.08 | 1.05 | 1.05 | 0.03 | 10 | 27.2 | 1E-102   |
| IPI00924510 | Putative uncharacterized protein RIF1                                                                                | C9JI70   | 0.89 | 1.12 | 0.90 | 0.97 | 0.13 | 9  | 5.2  | 1.8E-107 |
| IPI00924549 | BET1 homolog                                                                                                         | C9JZC1   |      | 1.07 |      | 1.07 |      | 2  | 21.8 | 1.09E-59 |
| IPI00924713 | cDNA, FLJ93994, highly similar to Homo sapiens phosphate cytidyltransferase 1, choline, alpha isoform (PCYT1A), mRNA | B2R8P1   | 0.96 | 1.07 | 1.11 | 1.05 | 0.08 | 9  | 35   | 8.28E-29 |
| IPI00924769 | Putative uncharacterized protein WBSCR22                                                                             | C9K060   |      | 1.17 |      | 1.17 |      | 2  | 11.1 | 6.82E-05 |
| IPI00924778 | Epithelial cell transforming sequence 2 oncogene protein splice variant b                                            | Q0MT80   | 1.06 |      | 1.08 | 1.07 | 0.01 | 3  | 6    | 2.52E-05 |
| IPI00924780 | Putative uncharacterized protein RAPH1                                                                               | C9K0J5   |      | 1.05 |      | 1.05 |      | 2  | 1.7  | 0.000155 |
| IPI00924788 | Arylacetamide deacetylase-like 1                                                                                     | Q6PIU2-2 | 0.82 | 1.20 | 1.21 | 1.08 | 0.22 | 8  | 29.9 | 1.7E-294 |
| IPI00924816 | Myotrophin                                                                                                           | P58546   | 0.94 |      |      | 0.94 |      | 3  | 30.5 | 1.1E-167 |
| IPI00924991 | cDNA FLJ54356, highly similar to DNA-repair protein complementing XP-C cells                                         | B4DIP3   |      | 1.03 |      | 1.03 |      | 3  | 5.2  | 6.05E-06 |
| IPI00925052 | Putative uncharacterized protein ARPC4                                                                               | C9JWM7   | 0.98 | 1.08 | 1.14 | 1.07 | 0.08 | 9  | 29.9 | 3.13E-59 |
| IPI00925205 | SH3-domain GRB2-like endophilin B2                                                                                   | B7ZC38   |      |      | 1.40 | 1.40 |      | 6  | 21.5 | 7.06E-19 |
| IPI00925217 | CLASP2 protein                                                                                                       | B2RTR1   | 0.75 | 1.30 |      | 1.03 | 0.39 | 5  | 5.3  | 5.3E-176 |
| IPI00925251 | Putative uncharacterized protein SNRPG                                                                               | C9J303   | 0.91 | 0.95 | 0.98 | 0.95 | 0.03 | 3  | 23.3 | 2.1E-139 |
| IPI00925413 | EIF4G1 protein                                                                                                       | B2RU10   | 0.83 |      |      | 0.83 |      | 43 | 29.4 | 0        |
| IPI00925520 | 6-phosphofructokinase, liver type                                                                                    | P17858-2 |      | 1.20 |      | 1.20 |      | 15 | 21.7 | 2.6E-113 |
| IPI00925656 | MRPS17 protein                                                                                                       | Q8IY71   | 0.83 | 0.98 | 0.92 | 0.91 | 0.07 | 2  | 16.9 | 3.62E-98 |
| IPI00925803 | cDNA FLJ60579                                                                                                        | B4DIY7   | 0.99 |      |      | 0.99 |      | 2  | 6.4  | 5.6E-138 |
| IPI00925804 | Non-functional aryl hydrocarbon receptor interacting protein                                                         | A5JGZ4   | 1.09 | 1.40 | 1.39 | 1.29 | 0.17 | 8  | 26.9 | 6.3E-158 |

|             |                                                                                                                             |          |      |      |      |      |      |    |      |          |
|-------------|-----------------------------------------------------------------------------------------------------------------------------|----------|------|------|------|------|------|----|------|----------|
| IPI00925918 | Coiled-coil domain-containing protein 12                                                                                    | Q8WUD4   | 1.27 | 1.23 | 1.08 | 1.19 | 0.10 | 8  | 43   | 6.5E-199 |
| IPI00926007 | FLJ00144 protein                                                                                                            | Q8TEP9   | 1.21 |      |      | 1.21 |      | 16 | 64.7 | 4.2E-223 |
| IPI00926109 | DEAH box protein 30                                                                                                         | Q7L2E3-2 | 0.87 | 1.01 | 1.02 | 0.97 | 0.09 | 21 | 21   | 1.4E-112 |
| IPI00926396 | Tumor necrosis factor ligand superfamily member 10 isoform 3                                                                | C9JP96   | 0.84 |      |      | 0.84 |      | 1  | 33.8 | 0.01533  |
| IPI00926491 | cDNA FLJ56092, highly similar to Pentatricopeptide repeat protein 1                                                         | B4DJ38   |      | 0.84 | 0.95 | 0.90 | 0.08 | 3  | 5.6  | 2.28E-23 |
| IPI00926529 | Putative uncharacterized protein SUMF2                                                                                      | C9J660   | 1.25 | 1.23 |      | 1.24 | 0.01 | 5  | 18.5 | 3.4E-30  |
| IPI00926581 | MYH14 variant protein                                                                                                       | B0I1S2   |      |      | 0.98 | 0.98 |      | 18 | 7.9  | 5.7E-220 |
| IPI00926625 | Zyxin                                                                                                                       | Q15942   | 0.92 | 0.87 | 0.91 | 0.90 | 0.03 | 15 | 43   | 2.6E-144 |
| IPI00926648 | Putative uncharacterized protein APEH                                                                                       | C9JIF9   | 1.10 | 1.15 | 1.10 | 1.12 | 0.03 | 11 | 21.3 | 6.08E-67 |
| IPI00926903 | Putative uncharacterized protein CHCHD3                                                                                     | C9JRZ6   | 0.88 | 0.92 | 0.89 | 0.90 | 0.02 | 16 | 45.3 | 3.8E-239 |
| IPI00926925 | OGDH protein                                                                                                                | A2VCT3   | 1.11 | 1.45 | 1.24 | 1.27 | 0.17 | 3  | 3.2  | 1.14E-06 |
| IPI00926977 | 26S protease regulatory subunit 10B                                                                                         | P62333   | 0.96 | 1.06 | 1.05 | 1.02 | 0.05 | 23 | 59.8 | 2E-267   |
| IPI00927412 | NA                                                                                                                          | C9J8D9   | 1.66 | 1.11 | 0.91 | 1.22 | 0.39 | 2  | 22.9 | 2E-166   |
| IPI00927432 | COX assembly mitochondrial protein homolog                                                                                  | C9J8M2   | 0.75 | 1.11 | 1.10 | 0.99 | 0.20 | 2  | 17.7 | 3.61E-09 |
| IPI00927531 | Adapter-related protein complex 1 sigma-1A subunit                                                                          | C9JXA6   | 1.11 | 1.10 | 1.05 | 1.09 | 0.03 | 2  | 13.1 | 1.5E-123 |
| IPI00927606 | Cellular glutathione peroxidase                                                                                             | P07203   |      | 0.38 |      | 0.38 |      | 2  | 12.3 | 9.97E-06 |
| IPI00927614 | 256 kDa golgin                                                                                                              | Q13439-3 | 1.41 | 0.64 |      | 1.03 | 0.55 | 3  | 1.7  | 1.31E-42 |
| IPI00927646 | Ubiquitin carboxyl-terminal hydrolase                                                                                       | B4DGT3   | 0.82 |      |      | 0.82 |      | 3  | 3    | 5.34E-51 |
| IPI00927658 | Putative uncharacterized protein RPL32                                                                                      | C9JBL2   | 0.86 | 0.85 | 0.85 | 0.85 | 0.01 | 10 | 47.7 | 1.3E-167 |
| IPI00927682 | Putative uncharacterized protein RAB3GAP1                                                                                   | C9J837   | 1.00 | 0.95 | 1.06 | 1.00 | 0.05 | 15 | 21.9 | 9.8E-152 |
| IPI00927731 | Angio-associated, migratory cell protein, isoform CRA_a                                                                     | C9JEH3   | 0.78 | 1.05 | 0.97 | 0.93 | 0.14 | 6  | 17.7 | 1.41E-83 |
| IPI00927892 | Beta-MPP                                                                                                                    | O75439   | 0.82 | 1.05 | 1.04 | 0.97 | 0.13 | 11 | 24.9 | 1.4E-17  |
| IPI00927933 | Protein FAM136A                                                                                                             | Q96C01   | 0.86 |      | 0.81 | 0.84 | 0.03 | 3  | 13.1 | 1.38E-27 |
| IPI00929268 | cDNA FLJ57057, highly similar to Small subunit processome component 20 homolog                                              | B4DN27   | 0.79 | 0.65 | 0.63 | 0.69 | 0.09 | 8  | 3.5  | 7.48E-40 |
| IPI00929313 | Uncharacterized protein FLJ40176                                                                                            | Q8NDH2   |      |      | 1.16 | 1.16 |      | 3  | 0.5  | 0.017334 |
| IPI00929344 | cDNA FLJ77779, highly similar to Homo sapiens phosphoribosylformylglycinamide synthase (FGAR amidotransferase) (PFAS), mRNA | A8K8N7   | 0.85 | 0.96 | 0.86 | 0.89 | 0.06 | 24 | 27.5 | 4E-221   |
| IPI00930241 | EBNA1-binding protein 2                                                                                                     | Q99848   | 1.02 | 0.91 | 0.94 | 0.96 | 0.06 | 10 | 29.9 | 7.36E-88 |

|             |                                                                              |          |      |      |      |      |      |    |      |          |
|-------------|------------------------------------------------------------------------------|----------|------|------|------|------|------|----|------|----------|
| IPI00930688 | Alpha-tubulin ubiquitous                                                     | P68363   | 1.02 | 1.14 | 1.13 | 1.10 | 0.06 | 31 | 75.4 | 0        |
| IPI00930706 | cDNA FLJ55259, highly similar to Four and a half LIM domains protein 1       | B7Z793   | 1.01 | 1.40 | 1.13 | 1.18 | 0.20 | 9  | 28.8 | 1.9E-242 |
| IPI00930710 | Mitochondrial aspartate-glutamate carrier protein                            | Q546F9   | 0.91 | 0.76 | 0.91 | 0.86 | 0.09 | 14 | 30.3 | 0        |
| IPI00935649 | Putative uncharacterized protein CUL4A                                       | A8MSH7   | 1.12 |      | 1.40 | 1.26 | 0.20 | 10 | 11.2 | 8.21E-54 |
| IPI00935906 | cDNA FLJ56465, highly similar to Dynactin-1                                  | B4DM45   | 1.00 | 1.15 | 1.08 | 1.07 | 0.07 | 28 | 28.7 | 0        |
| IPI00936141 | AKT-interacting protein                                                      | Q9H8T0-2 |      | 1.41 |      | 1.41 |      | 2  | 13   | 6.98E-10 |
| IPI00936284 | Dihydrofolate reductase                                                      | P00374   | 1.31 | 1.34 | 1.31 | 1.32 | 0.02 | 11 | 44.3 | 2.34E-47 |
| IPI00936328 | MARCKS-related protein-like                                                  |          | 0.89 |      |      | 0.89 |      | 2  | 10.8 | 3.95E-06 |
| IPI00936738 | Torsin-1A-interacting protein 1                                              | Q5JTV8-1 |      | 1.14 |      | 1.14 |      | 12 | 29   | 4.4E-155 |
| IPI00936844 | NA                                                                           |          |      | 1.06 |      | 1.06 |      | 1  | 6.6  | 0.006426 |
| IPI00937477 | WD repeat-containing protein 43                                              | Q15061   |      | 0.81 | 0.78 | 0.80 | 0.02 | 10 | 16.7 | 5.71E-51 |
| IPI00937635 | NA                                                                           |          |      | 1.03 |      | 1.03 |      | 1  | 12.2 | 2.8E-07  |
| IPI00937956 | Putative uncharacterized protein FNBP1L                                      | A6NDI6   |      |      | 0.92 | 0.92 |      | 2  | 5.9  | 0.001546 |
| IPI00938079 | cDNA FLJ55458, highly similar to Programmed cell death 6-interacting protein | B4DHD2   | 0.92 | 1.13 | 1.11 | 1.05 | 0.11 | 44 | 60.4 | 0        |
| IPI00939154 | cDNA FLJ61231, highly similar to Apoptosis-stimulating of p53 protein 2      | B4DG66   |      | 1.02 |      | 1.02 |      | 2  | 2.7  | 1.9E-15  |
| IPI00939159 | Adenylyl cyclase-associated protein                                          | B4DNA3   | 1.39 | 0.91 | 1.05 | 1.12 | 0.25 | 27 | 67.9 | 0        |
| IPI00939163 | Antigen NY-CO-25                                                             | Q92598-1 | 0.74 | 0.89 | 0.84 | 0.82 | 0.07 | 38 | 40.7 | 0        |
| IPI00939239 | High mobility group nucleosome-binding domain-containing protein 1           | P05114   | 1.49 |      | 1.20 | 1.35 | 0.20 | 5  | 39.6 | 8.56E-27 |
| IPI00939304 | Importin subunit beta-3                                                      | O00410-3 | 0.79 | 0.88 | 0.86 | 0.84 | 0.04 | 43 | 45.4 | 0        |
| IPI00939339 | Alcohol dehydrogenase 6                                                      | P28332-2 | 0.86 |      | 1.16 | 1.01 | 0.21 | 1  | 2.7  | 0.002277 |
| IPI00939523 | DEAD box protein 46                                                          | Q7L014   | 0.90 | 1.03 | 1.01 | 0.98 | 0.07 | 14 | 16.5 | 1.32E-58 |
| IPI00939667 | Cell growth-inhibiting gene 1 protein                                        | O14773-1 | 1.18 | 0.46 | 1.07 | 0.90 | 0.39 | 4  | 12.3 | 9.05E-18 |
| IPI00939707 | Protein KIAA0664                                                             | O75153   |      | 0.82 | 0.74 | 0.78 | 0.06 | 11 | 10.2 | 1.8E-25  |
| IPI00939864 | cDNA FLJ23974 fis, clone HEP18860                                            | Q6ZME5   |      |      | 0.80 | 0.80 |      | 2  | 20.3 | 1.06E-27 |
| IPI00940000 | DEAD box polypeptide 17 isoform p82 variant                                  | Q59F66   | 1.00 | 1.06 | 1.02 | 1.03 | 0.03 | 35 | 48.2 | 0        |
| IPI00940113 | cDNA, FLJ93510, highly similar to Homo sapiens JTV1 gene (JTV1), mRNA        | B2R7M3   | 0.68 | 1.01 | 0.91 | 0.87 | 0.17 | 4  | 18.4 | 4.75E-20 |
| IPI00940180 | Dipeptidyl peptidase 9                                                       | Q86TI2-2 | 1.23 | 1.06 | 0.88 | 1.05 | 0.18 | 6  | 7.6  | 2.2E-24  |



|             |                                                                                                                                                            |          |      |      |      |      |      |    |      |          |
|-------------|------------------------------------------------------------------------------------------------------------------------------------------------------------|----------|------|------|------|------|------|----|------|----------|
| IPI00940292 | cDNA FLJ58495, highly similar to Adapter-related protein complex 1 beta-1 subunit                                                                          | B4DKH5   | 1.06 | 1.08 | 1.07 | 1.07 | 0.01 | 29 | 29.3 | 4.9E-280 |
| IPI00940373 | RalBP1-associated Eps domain-containing protein 1                                                                                                          | Q96D71-1 | 1.22 | 0.86 | 0.91 | 1.00 | 0.19 | 5  | 11.7 | 7.67E-70 |
| IPI00940755 | Putative uncharacterized protein DENR                                                                                                                      | C9JW58   | 0.99 | 1.02 | 1.01 | 1.01 | 0.01 | 8  | 37.5 | 0        |
| IPI00940936 | LYN protein                                                                                                                                                | Q6NUK7   |      | 0.81 | 1.05 | 0.93 | 0.17 | 5  | 9.1  | 6.84E-29 |
| IPI00940950 | Ribosomal protein L10                                                                                                                                      | Q5HY50   | 2.66 | 0.95 | 0.86 | 1.49 | 1.01 | 13 | 52.2 | 2.1E-158 |
| IPI00941161 | General vesicular transport factor p115                                                                                                                    | O60763   | 0.93 | 1.13 | 1.03 | 1.03 | 0.10 | 22 | 31.2 | 0        |
| IPI00941170 | E3 ubiquitin-protein ligase NEDD4-like                                                                                                                     | Q96PU5-8 | 0.77 | 1.06 | 0.85 | 0.89 | 0.15 | 10 | 14   | 9.29E-53 |
| IPI00941534 | CDC10 protein homolog                                                                                                                                      | Q16181-1 | 1.00 | 1.23 | 1.23 | 1.15 | 0.13 | 17 | 39.7 | 6.1E-268 |
| IPI00941549 | cDNA FLJ75843, highly similar to Homo sapiens pleckstrin homology domain containing, family A (phosphoinositide binding specific) member 2 (PLEKHA2), mRNA | A8K727   | 0.65 |      |      | 0.65 |      | 1  | 2.6  | 2.12E-11 |
| IPI00941696 | NA                                                                                                                                                         | C9J8V8   |      |      | 1.14 | 1.14 |      | 2  | 18.6 | 1.83E-15 |
| IPI00941711 | Myosin                                                                                                                                                     | Q14784   | 1.45 | 1.02 | 0.95 | 1.14 | 0.27 | 9  | 10   | 1.9E-133 |
| IPI00941810 | NA                                                                                                                                                         |          | 0.87 | 0.94 |      | 0.90 | 0.05 | 15 | 18.6 | 2.5E-261 |
| IPI00941899 | Cytosolic thyroid hormone-binding protein                                                                                                                  | P14618-2 | 0.79 | 1.42 | 1.30 | 1.17 | 0.34 | 46 | 65.5 | 0        |
| IPI00942092 | Adenylosuccinase                                                                                                                                           | P30566-1 | 0.79 | 0.99 | 0.97 | 0.92 | 0.11 | 12 | 33.1 | 2.96E-97 |
| IPI00942266 | SLC9A3R2 protein                                                                                                                                           | Q6NTG0   | 0.80 |      | 0.82 | 0.81 | 0.01 | 3  | 9.9  | 5.91E-06 |
| IPI00942269 | Putative uncharacterized protein TBC1D4                                                                                                                    | C9JF11   |      |      | 0.86 | 0.86 |      | 2  | 2.4  | 1.03E-26 |
| IPI00942279 | Putative uncharacterized protein APOOL                                                                                                                     | C9J5N9   | 0.95 | 1.14 | 0.98 | 1.03 | 0.10 | 4  | 23.1 | 4.19E-19 |
| IPI00942405 | LSM7 homolog, U6 small nuclear RNA associated                                                                                                              | O75243   |      |      | 0.48 | 0.48 |      | 2  | 23.4 | 9.18E-09 |
| IPI00942417 | Nik-related protein kinase                                                                                                                                 | Q7Z2Y5-1 | 1.79 |      |      | 1.79 |      | 2  | 2.2  | 0.003375 |
| IPI00942450 | Putative uncharacterized protein SFRS15                                                                                                                    | C9J1W7   | 1.13 | 1.19 | 1.05 | 1.12 | 0.07 | 5  | 8.2  | 2.85E-27 |
| IPI00942549 | Putative uncharacterized protein ENSP00000400408                                                                                                           | C9J062   | 0.96 |      |      | 0.96 |      | 2  | 11.1 | 1.18E-45 |
| IPI00942869 | Cadherin-associated Src substrate                                                                                                                          | O60716-1 | 0.94 | 1.13 | 1.07 | 1.05 | 0.10 | 27 | 35.8 | 0        |
| IPI00942981 | DDR GK domain-containing protein 1                                                                                                                         | C9JSZ5   | 1.38 |      |      | 1.38 |      | 3  | 14.3 | 9.55E-16 |
| IPI00943181 | Putative uncharacterized protein PSME2                                                                                                                     | C9JE52   | 1.10 | 1.07 | 1.17 | 1.11 | 0.05 | 13 | 51.6 | 3.4E-147 |
| IPI00943886 | Polyadenylate-binding protein-interacting protein 1                                                                                                        | Q9H074-1 | 1.01 |      | 1.13 | 1.07 | 0.08 | 3  | 6    | 6.67E-08 |
| IPI00944536 | Alpha N-catenin                                                                                                                                            | P26232-5 |      |      | 0.92 | 0.92 |      | 7  | 9.8  | 1.3E-245 |

|             |                                                                                          |          |        |      |      |       |       |    |      |          |
|-------------|------------------------------------------------------------------------------------------|----------|--------|------|------|-------|-------|----|------|----------|
| IPI00945379 | Cell proliferation-inducing gene 53 protein                                              | P46934-1 |        |      | 0.86 | 0.86  |       | 3  | 2.6  | 1.47E-06 |
| IPI00945633 | Putative uncharacterized protein SSR1                                                    | C9IZQ1   | 1.18   | 0.98 | 1.01 | 1.06  | 0.11  | 4  | 19.1 | 1E-116   |
| IPI00945749 | cDNA FLJ77653                                                                            | A8K3B4   | 1.02   | 1.04 | 1.19 | 1.08  | 0.09  | 15 | 25.7 | 4.4E-294 |
| IPI00945846 | Trypsin 1                                                                                | P07477   | 138.44 | 0.02 | 0.03 | 46.16 | 79.91 | 1  | 3.8  | 5.54E-43 |
| IPI00945864 | cDNA FLJ58644, highly similar to Fragile X mental retardation syndrome-related protein 1 | B4DXZ6   |        |      | 0.98 | 0.98  |       | 20 | 39.1 | 4.8E-121 |
| IPI00945940 | cDNA FLJ54528, highly similar to Serine/threonine-protein kinase MST4 (EC 2.7.11.1)      | B4E0Y9   | 1.01   | 1.19 | 1.21 | 1.13  | 0.11  | 11 | 32.4 | 2.1E-276 |
| IPI00945964 | Elongation factor G 1, mitochondrial                                                     | Q96RP9-2 | 0.78   |      |      | 0.78  |       | 5  | 9.4  | 5.49E-23 |
| IPI00946083 | RING finger protein 104                                                                  | Q8IWR1   |        |      | 1.03 | 1.03  |       | 1  | 2.1  | 6.23E-47 |
| IPI00946103 | Putative uncharacterized protein NDUFA5                                                  | C9IZN5   | 0.97   |      |      | 0.97  |       | 3  | 38.7 | 2.9E-38  |
| IPI00946150 | cDNA FLJ52061, highly similar to Translocon-associated protein subunit gamma             | B4E2P2   | 0.75   | 0.95 | 1.15 | 0.95  | 0.20  | 2  | 9.1  | 2.7E-100 |
| IPI00946154 | Basic fibroblast growth factor                                                           | P09038-4 | 0.61   | 0.71 | 0.70 | 0.67  | 0.05  | 6  | 19.1 | 1.19E-58 |
| IPI00946415 | ACIN1 protein                                                                            | B2RTT4   |        | 1.03 | 1.11 | 1.07  | 0.06  | 15 | 15.8 | 3.4E-240 |
| IPI00946421 | Cell death regulatory protein GRIM-19                                                    | Q9P0J0   | 0.91   | 1.12 | 1.10 | 1.04  | 0.12  | 5  | 15   | 1.4E-28  |
| IPI00946478 | Apoptin-associating protein 1                                                            | Q8N488   |        | 1.23 | 1.24 | 1.23  | 0.01  | 3  | 24.6 | 1.66E-84 |
| IPI00946792 | cDNA FLJ55335, highly similar to Tyrosine-protein kinase-like 7                          | B7Z477   | 0.94   | 0.99 | 1.20 | 1.05  | 0.14  | 13 | 16.9 | 7.2E-123 |
| IPI00946830 | cDNA FLJ51877, highly similar to Homo sapiens Mak3 homolog (MAK3), mRNA                  | B0AZT5   |        | 1.09 |      | 1.09  |       | 8  | 50.5 | 1.97E-78 |
| IPI00947127 | L-lactate dehydrogenase                                                                  | B7Z5E3   | 0.96   | 1.07 | 1.01 | 1.01  | 0.05  | 31 | 66.5 | 0        |
| IPI00947530 | Putative uncharacterized protein TAGLN3                                                  | C9J5W6   | 0.92   | 0.77 |      | 0.84  | 0.10  | 3  | 30.4 | 4.6E-186 |
| IPI00952618 | FERM and PDZ domain-containing protein 4                                                 | Q14CM0   | 0.76   |      |      | 0.76  |       | 2  | 1.4  | 0.007713 |
| IPI00952714 | MHC class I antigen                                                                      | Q2YHR9   | 0.70   |      | 1.53 | 1.11  | 0.58  | 8  | 26   | 9.04E-84 |
| IPI00953224 | Putative uncharacterized protein APIP                                                    | C9JEQ4   | 1.10   | 0.96 |      | 1.03  | 0.09  | 3  | 25   | 4.38E-13 |
| IPI00953272 | Putative uncharacterized protein NDUFA11                                                 | C9JT23   |        |      | 0.99 | 0.99  |       | 2  | 16.7 | 1.07E-28 |
| IPI00953308 | Putative uncharacterized protein PCM1                                                    | A6NNN6   |        | 0.94 | 1.08 | 1.01  | 0.10  | 4  | 2.3  | 1.01E-07 |
| IPI00953461 | La ribonucleoprotein domain family member 4B                                             | Q92615   |        | 1.32 | 1.02 | 1.17  | 0.21  | 4  | 6.5  | 9.23E-19 |
| IPI00953526 | Putative uncharacterized protein CCNK                                                    | C9JI13   |        | 1.12 | 0.49 | 0.81  | 0.44  | 2  | 5.8  | 1.81E-85 |
| IPI00953712 | KIAA1715 protein                                                                         | B7ZLA8   | 1.16   | 1.07 | 0.92 | 1.05  | 0.12  | 4  | 12.4 | 6.45E-18 |
| IPI00954006 | Putative uncharacterized protein DKFZp667H197                                            | Q69YJ7   | 0.85   | 1.06 | 0.93 | 0.94  | 0.11  | 10 | 11.4 | 3.66E-21 |

|             |                                                                 |          |      |      |      |      |      |   |      |          |
|-------------|-----------------------------------------------------------------|----------|------|------|------|------|------|---|------|----------|
| IPI00954084 | MHC class I antigen                                             | Q9MYF2   | 1.21 | 1.81 | 1.63 | 1.55 | 0.31 | 5 | 33.1 | 7.99E-65 |
| IPI00954460 | MHC class I antigen                                             | Q1W4D6   | 2.91 |      | 1.28 | 2.09 | 1.15 | 9 | 42.9 | 2.2E-136 |
| IPI00954473 | D-tyrosyl-tRNA(Tyr) deacylase                                   | Q496C9   | 0.96 | 1.06 | 1.02 | 1.01 | 0.05 | 6 | 25.8 | 1.3E-176 |
| IPI00954530 | OCIA domain-containing protein 1                                | Q9NX40-1 | 1.05 | 0.99 | 1.13 | 1.06 | 0.07 | 8 | 41.6 | 4.5E-124 |
| IPI00954568 | Mitochondrial import inner membrane translocase subunit Tim17-B | O60830   | 0.88 | 1.04 | 0.98 | 0.96 | 0.08 | 5 | 36.9 | 7.54E-49 |

**Table S3.** List of proteins whose expression was significantly changed upon K<sub>2</sub>Cr<sub>2</sub>O<sub>7</sub> treatment. The ratio is expressed as the average ratio in K<sub>2</sub>Cr<sub>2</sub>O<sub>7</sub>-treated cells versus control untreated cells. (“S.D.” represents standard deviation).

| <b>IPI No.</b>      | <b>Protein Names</b>                                                                | <b>Ratio</b> | <b>S.D.</b> |
|---------------------|-------------------------------------------------------------------------------------|--------------|-------------|
| <b>Up-regulated</b> |                                                                                     |              |             |
| IPI00945846         | Trypsin 1                                                                           | 46.16        | 79.91       |
| IPI00022990         | Statherin                                                                           | 11.11        |             |
| IPI00027462         | Calgranulin-B                                                                       | 10.60        |             |
| IPI00302030         | Ras-related protein Rab-30                                                          | 9.58         |             |
| IPI00296909         | 193 kDa vault protein                                                               | 9.37         |             |
| IPI00747077         | RUN and TBC1 domain-containing protein 2                                            | 7.68         |             |
| IPI00020944         | Squalene synthase                                                                   | 4.19         | 0.67        |
| IPI00008475         | HMG-CoA synthase                                                                    | 4.10         | 0.86        |
| IPI00220327         | 67 kDa cytokeratin                                                                  | 4.01         | 6.75        |
| IPI00290110         | Neoplastic transformation inhibitor protein                                         | 3.64         | 0.39        |
| IPI00176193         | Collagen alpha-1(XIV) chain                                                         | 3.33         | 4.49        |
| IPI00000070         | Low-density lipoprotein receptor                                                    | 3.21         | 0.90        |
| IPI00220014         | Isopentenyl-PP-delta-isomerase                                                      | 3.17         | 0.36        |
| IPI00295601         | BM88 antigen                                                                        | 2.91         |             |
| IPI00016014         | Cerebral protein 14                                                                 | 2.87         |             |
| IPI00300725         | Cytokeratin-6A                                                                      | 2.84         |             |
| IPI00030362         | Differentiation-dependent protein A4                                                | 2.74         |             |
| IPI00477802         | Nuclear phosphoprotein p21/SIIR                                                     | 2.74         | 1.96        |
| IPI00477526         | UPF0550 protein C7orf28                                                             | 2.71         |             |
| IPI00914045         | Small integral membrane protein 13                                                  | 2.55         |             |
| IPI00103145         | Class A basic helix-loop-helix protein 39                                           | 2.54         |             |
| IPI00006442         | Coilin                                                                              | 2.51         | 2.37        |
| IPI00296999         | ATP synthase mitochondrial F1 complex assembly factor 2                             | 2.50         |             |
| IPI00410297         | Endo-glucuronidase                                                                  | 2.45         |             |
| IPI00300333         | Pancreatic differentiation protein 2                                                | 2.42         | 2.40        |
| IPI00019355         | Cerebral protein 2                                                                  | 2.31         |             |
| IPI00016441         | Pro-rich, PH and SH2 domain-containing signaling mediator                           | 2.29         |             |
| IPI00107831         | Leukocyte common antigen related                                                    | 2.18         |             |
| IPI00045914         | Msx2-interacting protein                                                            | 2.15         | 1.76        |
| IPI00007956         | Thioredoxin-binding protein 2                                                       | 2.15         |             |
| IPI00909366         | cDNA FLJ60058, highly similar to Myosin light chain 1, slow-twitch muscle A isoform | 2.14         | 1.79        |
| IPI00332493         | Pleckstrin homology domain-containing family O member 2                             | 2.14         | 1.39        |
| IPI00021033         | Collagen alpha-1(III) chain                                                         | 2.14         | 0.50        |
| IPI00465261         | Endoplasmic reticulum aminopeptidase 2                                              | 2.13         |             |
| IPI00294501         | 7-dehydrocholesterol reductase                                                      | 2.13         | 0.09        |
| IPI00847793         | Dermcidin isoform 2                                                                 | 2.12         | 3.46        |

|             |                                                                                                              |      |      |
|-------------|--------------------------------------------------------------------------------------------------------------|------|------|
| IPI00954460 | MHC class I antigen                                                                                          | 2.09 | 1.15 |
| IPI00016703 | Desmosterol reductase                                                                                        | 2.05 | 0.56 |
| IPI00010717 | Mevalonate kinase                                                                                            | 2.04 |      |
| IPI00914566 | Farnesyl diphosphate synthetase                                                                              | 2.04 | 0.11 |
| IPI00395596 | Amino-terminal enhancer of split                                                                             | 2.03 |      |
| IPI00014172 | Golgi 4-transmembrane-spanning transporter MTP                                                               | 2.01 |      |
| IPI00219783 | Ubiquitin-conjugating enzyme E2G 1                                                                           | 1.99 | 1.61 |
| IPI00299033 | Importin alpha Q2                                                                                            | 1.98 | 1.54 |
| IPI00872929 | Apolipoprotein B mRNA editing enzyme, catalytic polypeptide-like 3C variant                                  | 1.96 |      |
| IPI00219628 | Protein kinase C beta type                                                                                   | 1.96 |      |
| IPI00027240 | Guanine nucleotide-binding protein G(I)/G(S)/G(O) subunit gamma-5                                            | 1.93 | 0.01 |
| IPI00402657 | RNA polymerase II-associated protein 1                                                                       | 1.93 |      |
| IPI00398625 | Hornerin                                                                                                     | 1.92 | 3.15 |
| IPI00922513 | cDNA FLJ57872, highly similar to Mevalonate kinase (EC 2.7.1.36)                                             | 1.90 | 0.22 |
| IPI00645782 | cDNA FLJ58300, highly similar to Seryl-tRNA synthetase, mitochondrial (EC 6.1.1.11)                          | 1.88 | 0.95 |
| IPI00163361 | T-box transcription factor TBX14                                                                             | 1.84 |      |
| IPI00003817 | Rho GDP dissociation inhibitor (GDI) beta                                                                    | 1.84 |      |
| IPI00304227 | Cadherin-11                                                                                                  | 1.83 |      |
| IPI00386516 | cDNA FLJ32696 fis, clone TESTI2000358                                                                        | 1.83 | 0.84 |
| IPI00896498 | cDNA, FLJ93047, highly similar to Homo sapiens matrix metalloproteinase 14 (membrane-inserted) (MMP14), mRNA | 1.82 | 0.25 |
| IPI00299086 | Melanoma differentiation-associated protein 9                                                                | 1.80 | 0.22 |
| IPI00303297 | DnaJ homolog subfamily C member 25                                                                           | 1.80 |      |
| IPI00554560 | Lysine-rich nucleolar protein 1                                                                              | 1.80 | 0.99 |
| IPI00018801 | Eva-1 homolog B                                                                                              | 1.79 | 0.38 |
| IPI00942417 | Nik-related protein kinase                                                                                   | 1.79 |      |
| IPI00299738 | Procollagen C-endopeptidase enhancer 1                                                                       | 1.78 | 0.16 |
| IPI00295772 | Lanosterol 14 alpha-demethylase                                                                              | 1.78 | 0.06 |
| IPI00332106 | Hematopoietic PBX-interacting protein                                                                        | 1.76 | 0.26 |
| IPI00514832 | RING finger protein 109                                                                                      | 1.76 |      |
| IPI00009111 | 5T4 oncofetal antigen                                                                                        | 1.75 | 0.12 |
| IPI00009634 | Sulfide:quinone oxidoreductase, mitochondrial                                                                | 1.74 |      |
| IPI00015285 | CTP:phosphoethanolamine cytidyltransferase                                                                   | 1.72 | 0.20 |
| IPI00289547 | Transcription factor jun-D                                                                                   | 1.71 | 0.45 |
| IPI00011528 | CF-1 50 kDa subunit                                                                                          | 1.71 | 1.33 |
| IPI00651738 | 1,2-dihydroxy-3-keto-5-methylthiopentene dioxygenase                                                         | 1.71 | 0.40 |
| IPI00761160 | Calpain inhibitor                                                                                            | 1.70 |      |
| IPI00645849 | Extracellular matrix protein 1                                                                               | 1.70 | 0.20 |
| IPI00465176 | 39S ribosomal protein L28, mitochondrial                                                                     | 1.69 | 0.97 |
| IPI00041127 | Anti-silencing function protein 1 homolog B                                                                  | 1.69 | 0.15 |
| IPI00180675 | Alpha-tubulin 3                                                                                              | 1.68 | 0.24 |
| IPI00100213 | p53-inducible ribonucleotide reductase small subunit 2-like protein                                          | 1.68 | 0.49 |

|             |                                                                                                |      |      |
|-------------|------------------------------------------------------------------------------------------------|------|------|
| IPI00291419 | Acetoacetyl-CoA acetyltransferase-2                                                            | 1.68 | 0.12 |
| IPI00019551 | Beckwith-Wiedemann syndrome chromosomal region 1 candidate gene C protein                      | 1.67 |      |
| IPI00157734 | Exocyst complex component 3                                                                    | 1.67 |      |
| IPI00784739 | Uncharacterized protein C14orf43                                                               | 1.67 | 0.12 |
| IPI00011676 | Neural Wiskott-Aldrich syndrome protein                                                        | 1.67 | 0.60 |
| IPI00413817 | Serine incorporator 1                                                                          | 1.66 |      |
| IPI00009747 | Lanosterol cyclase                                                                             | 1.66 | 0.03 |
| IPI00183642 | Suppressor of hairy wing homolog 3                                                             | 1.66 |      |
| IPI00022078 | Differentiation-related gene 1 protein                                                         | 1.65 | 0.19 |
| IPI00739099 | Collagen alpha-2(V) chain                                                                      | 1.65 | 0.64 |
| IPI00219344 | Calcium-binding protein BDR-1                                                                  | 1.65 | 0.28 |
| IPI00328243 | Choline phosphatase 3                                                                          | 1.65 | 0.14 |
| IPI00247063 | Atriopeptidase                                                                                 | 1.64 | 0.33 |
| IPI00642259 | 230 kDa bullous pemphigoid antigen                                                             | 1.64 | 0.97 |
| IPI00911050 | cDNA FLJ53329, highly similar to NADPH:adrenodoxin oxidoreductase, mitochondrial (EC 1.18.1.2) | 1.64 |      |
| IPI00024307 | Ephrin-B1                                                                                      | 1.63 |      |
| IPI00184871 | Uncharacterized protein C6orf130                                                               | 1.63 |      |
| IPI00880117 | Apolipoprotein B mRNA editing enzyme, catalytic polypeptide-like 3B                            | 1.63 | 0.89 |
| IPI00290614 | Endonuclease G, mitochondrial                                                                  | 1.62 |      |
| IPI00022629 | Protein regulator of cytokinesis 1                                                             | 1.61 | 0.42 |
| IPI00657752 | Putative uncharacterized protein CD81                                                          | 1.61 | 0.42 |
| IPI00000398 | Nucleolar and spindle-associated protein 1                                                     | 1.60 | 0.20 |
| IPI00102660 | Progressive external ophthalmoplegia 1 protein                                                 | 1.60 |      |
| IPI00061111 | BLM-associated protein of 18 kDa                                                               | 1.60 | 0.06 |
| IPI00027223 | Cytosolic NADP-isocitrate dehydrogenase                                                        | 1.60 | 0.15 |
| IPI00257932 | Transcription elongation factor A protein-like 5                                               | 1.60 |      |
| IPI00375462 | Serine/arginine-rich-splicing regulatory protein 86                                            | 1.59 | 0.08 |
| IPI00022745 | Mevalonate-PP decarboxylase                                                                    | 1.59 | 0.28 |
| IPI00465431 | 35 kDa lectin                                                                                  | 1.59 | 0.07 |
| IPI00743663 | E3 ubiquitin-protein ligase TRAF6                                                              | 1.59 | 0.51 |
| IPI00549564 | Acetoacetyl-CoA synthetase                                                                     | 1.58 |      |
| IPI00401829 | Uncharacterized protein C14orf38                                                               | 1.58 | 0.82 |
| IPI00478390 | Cyclin-dependent kinase inhibitor 2A, isoform 4                                                | 1.58 |      |
| IPI00304483 | Polyadenylate-binding protein-interacting protein 2                                            | 1.57 |      |
| IPI00329598 | 17-beta-hydroxysteroid dehydrogenase 11                                                        | 1.56 | 0.14 |
| IPI00788747 | TIMP metalloproteinase inhibitor 2                                                             | 1.56 |      |
| IPI00954084 | MHC class I antigen                                                                            | 1.55 | 0.31 |
| IPI00004758 | Autosomal recessive hypercholesterolemia protein                                               | 1.55 |      |
| IPI00005036 | RNA binding motif protein 5                                                                    | 1.55 | 0.34 |
| IPI00098524 | Enzyme-like protein PIT13                                                                      | 1.55 |      |
| IPI00479018 | Melanoma differentiation-associated protein 9                                                  | 1.54 | 0.25 |
| IPI00641384 | Protein transport protein Sec16A                                                               | 1.54 |      |

|             |                                                                                                  |      |      |
|-------------|--------------------------------------------------------------------------------------------------|------|------|
| IPI00018404 | Elongin 110 kDa subunit                                                                          | 1.54 |      |
| IPI00063213 | Mediator complex subunit 30                                                                      | 1.54 | 0.06 |
| IPI00099497 | Transcription factor MafF                                                                        | 1.53 | 0.32 |
| IPI00647163 | Transcription elongation factor A protein-like 4                                                 | 1.53 | 0.38 |
| IPI00103521 | Stoned B                                                                                         | 1.53 | 1.04 |
| IPI00022145 | Nuclear ubiquitous casein and cyclin-dependent kinases substrate                                 | 1.53 | 0.02 |
| IPI00514926 | Guanylate kinase 1                                                                               | 1.53 | 0.58 |
| IPI00166066 | ORM1-like protein 3                                                                              | 1.53 |      |
| IPI00016542 | WD repeat-containing protein 76                                                                  | 1.53 |      |
| IPI00011736 | Phosphatidylinositol 3-kinase 85 kDa regulatory subunit beta                                     | 1.52 | 0.39 |
| IPI00828172 | Protein FAM114A2                                                                                 | 1.52 | 0.30 |
| IPI00029144 | PP2A subunit B isoform PR72/PR130                                                                | 1.52 |      |
| IPI00017373 | Replication factor A protein 3                                                                   | 1.52 | 0.38 |
| IPI00215610 | 55 kDa erythrocyte membrane protein                                                              | 1.52 | 0.67 |
| IPI00873459 | Septin-10                                                                                        | 1.52 |      |
| IPI00329784 | Brain ryanodine receptor-calcium release channel                                                 | 1.52 |      |
| IPI00028419 | Adenovirus E1B19K-binding protein B5                                                             | 1.51 | 0.03 |
| IPI00016807 | NAD-dependent deacetylase sirtuin-5                                                              | 1.51 |      |
| IPI00029656 | Inversely correlated with estrogen receptor expression 1                                         | 1.51 |      |
| IPI00027166 | TIMP metalloproteinase inhibitor 2                                                               | 1.51 | 0.36 |
| IPI00006971 | Endosialin                                                                                       | 1.51 |      |
| IPI00552452 | Ubiquitin-like modifier activating enzyme 1                                                      | 1.50 | 0.41 |
| IPI00464999 | Amplified in breast cancer protein 1                                                             | 1.50 |      |
| IPI00607861 | 6-phosphogluconolactonase                                                                        | 1.50 |      |
| IPI00043622 | FERM domain-containing protein 6                                                                 | 1.50 |      |
| IPI00220578 | G(i) alpha-3                                                                                     | 1.49 | 0.27 |
| IPI00940950 | Ribosomal protein L10                                                                            | 1.49 | 1.01 |
| IPI00216088 | Cellular retinoic acid-binding protein 2                                                         | 1.49 | 0.05 |
| IPI00295940 | cDNA FLJ55508, highly similar to Sad1/unc-84-like protein 2                                      | 1.49 | 0.20 |
| IPI00012866 | Protein kinase B                                                                                 | 1.49 | 0.18 |
| IPI00012069 | Azoreductase                                                                                     | 1.49 | 0.61 |
| IPI00100980 | EH domain-containing protein 2                                                                   | 1.48 | 0.19 |
| IPI00017344 | Ras-related protein Rab-5B                                                                       | 1.48 | 0.07 |
| IPI00921909 | Zinc finger protein 185 variant 721                                                              | 1.48 |      |
| IPI00852806 | cDNA FLJ13729 fis, clone PLACE3000121, weakly similar to VESICULAR TRAFFIC CONTROL PROTEIN SEC15 | 1.48 | 0.65 |
| IPI00216730 | Histone H2A type 2-B                                                                             | 1.48 |      |
| IPI00551024 | ATP-dependent dihydroxyacetone kinase                                                            | 1.48 | 0.11 |
| IPI00298946 | Down syndrome critical region protein 3                                                          | 1.48 | 0.35 |
| IPI00215997 | CD9 antigen                                                                                      | 1.48 | 0.31 |
| IPI00306400 | Kinesin-like protein 2                                                                           | 1.48 | 0.31 |
| IPI00001690 | Cullin-7                                                                                         | 1.48 | 0.42 |
| IPI00001883 | SH3 and PX domain-containing protein 1                                                           | 1.48 |      |

|             |                                                                           |      |      |
|-------------|---------------------------------------------------------------------------|------|------|
| IPI00042099 | Pygopus homolog 2                                                         | 1.47 | 0.20 |
| IPI00306046 | Developmentally-regulated endothelial cell locus 1 protein                | 1.47 | 0.71 |
| IPI00000155 | 3-hydroxyisobutyrate dehydrogenase-like protein                           | 1.47 | 0.09 |
| IPI00178899 | Cyclin-A/CDK2-associated protein p45                                      | 1.47 |      |
| IPI00218803 | Fibulin-1                                                                 | 1.47 |      |
| IPI00301579 | cDNA FLJ59142, highly similar to Epididymal secretory protein E1          | 1.47 | 0.10 |
| IPI00029665 | Cob(I)alamin adenosyltransferase                                          | 1.46 | 0.06 |
| IPI00401002 | OriLyt TD-element-binding protein 7                                       | 1.46 | 0.28 |
| IPI00009737 | Ras-related GTP-binding protein D                                         | 1.46 |      |
| IPI00016891 | Ras-related protein Rab-6B                                                | 1.46 | 0.41 |
| IPI00641124 | cDNA FLJ55777, highly similar to DCN1-like protein 4                      | 1.46 |      |
| IPI00008943 | ATP-dependent RNA helicase DDX19B                                         | 1.46 | 0.06 |
| IPI00027463 | Calcyclin                                                                 | 1.46 |      |
| IPI00019407 | NAD(P)H steroid dehydrogenase                                             | 1.45 | 0.09 |
| IPI00029605 | Chondroitinsulfatase                                                      | 1.45 | 0.16 |
| IPI00304875 | HIRA-interacting protein 3                                                | 1.45 |      |
| IPI00043565 | Coiled-coil domain-containing protein 16                                  | 1.45 | 0.18 |
| IPI00893949 | MHC class I antigen                                                       | 1.45 | 0.32 |
| IPI00921172 | Peroxisomal carnitine O-octanoyltransferase                               | 1.45 |      |
| IPI00289831 | Receptor-type tyrosine-protein phosphatase S                              | 1.44 | 0.71 |
| IPI00166955 | Protein canopy homolog 4                                                  | 1.44 | 0.12 |
| IPI00550854 | Limitrin                                                                  | 1.44 |      |
| IPI00296772 | ADP-ribosylation factor-binding protein GGA2                              | 1.44 | 0.12 |
| IPI00031680 | Acyl-CoA-binding domain-containing protein 6                              | 1.44 | 0.35 |
| IPI00009726 | Nicotinamide mononucleotide adenylyltransferase 1                         | 1.44 |      |
| IPI00026314 | Actin-depolymerizing factor                                               | 1.44 | 0.12 |
| IPI00160901 | Putative uncharacterized protein GTSE1                                    | 1.44 | 0.60 |
| IPI00792422 | WASH complex subunit FAM21A                                               | 1.43 | 0.11 |
| IPI00022865 | Cyclin-A2                                                                 | 1.43 |      |
| IPI00479217 | Heterogeneous nuclear ribonucleoprotein U                                 | 1.43 |      |
| IPI00027713 | Cyclic AMP-responsive element-binding protein 1                           | 1.43 |      |
| IPI00014264 | Arf-GAP with coiled-coil, ANK repeat and PH domain-containing protein 2   | 1.43 |      |
| IPI00217950 | High mobility group nucleosome-binding domain-containing protein 2        | 1.43 | 0.23 |
| IPI00303954 | Cytochrome b5 outer mitochondrial membrane isoform                        | 1.43 | 0.06 |
| IPI00551002 | cDNA FLJ55173, highly similar to Nuclear distribution protein nudE-like 1 | 1.43 |      |
| IPI00402231 | Cysteine string protein                                                   | 1.43 | 0.12 |
| IPI00419721 | EPM2A-interacting protein 1                                               | 1.43 | 0.67 |
| IPI00395768 | Syntaxin-3                                                                | 1.43 | 0.02 |
| IPI00027444 | Leukocyte elastase inhibitor                                              | 1.42 | 0.02 |
| IPI00216952 | 70 kDa lamin                                                              | 1.42 | 0.41 |
| IPI00257508 | Collapsin response mediator protein 2                                     | 1.42 | 0.06 |
| IPI00026781 | [Acyl-carrier-protein] S-acetyltransferase                                | 1.42 | 0.18 |



|             |                                                                                                                              |      |      |
|-------------|------------------------------------------------------------------------------------------------------------------------------|------|------|
| IPI00011118 | Putative uncharacterized protein RRM2                                                                                        | 1.42 | 0.27 |
| IPI00644290 | NDRG family member 3                                                                                                         | 1.42 | 0.05 |
| IPI00395488 | Protein slit-like 2                                                                                                          | 1.42 | 0.42 |
| IPI00307257 | TBC1 domain family member 9B                                                                                                 | 1.42 | 0.38 |
| IPI00000105 | Lung resistance-related protein                                                                                              | 1.42 | 0.07 |
| IPI00936141 | AKT-interacting protein                                                                                                      | 1.41 |      |
| IPI00028122 | CLL-associated antigen KW-7                                                                                                  | 1.41 | 0.18 |
| IPI00021924 | Histone H1x                                                                                                                  | 1.41 | 0.18 |
| IPI00032293 | Cystatin-3                                                                                                                   | 1.41 | 0.28 |
| IPI00023191 | cDNA FLJ54710, highly similar to Target of Myb protein 1                                                                     | 1.41 | 0.26 |
| IPI00816474 | Mammalian retrotransposon derived protein 8C                                                                                 | 1.41 | 0.49 |
| IPI00005658 | Ubiquitin-like protein 4A                                                                                                    | 1.41 |      |
| IPI00299463 | Cell cycle regulatory protein p95                                                                                            | 1.40 |      |
| IPI00925205 | SH3-domain GRB2-like endophilin B2                                                                                           | 1.40 |      |
| IPI00784013 | Janus kinase 1                                                                                                               | 1.40 | 0.09 |
| IPI00018195 | Mitogen-activated protein kinase 3                                                                                           | 1.40 | 0.15 |
| IPI00328350 | Cell growth-inhibiting gene 39 protein                                                                                       | 1.40 | 0.23 |
| IPI00470559 | Ankyrin repeat domain-containing protein 25                                                                                  | 1.40 | 0.43 |
| IPI00007941 | Cardiac lineage protein 1                                                                                                    | 1.40 | 0.11 |
| IPI00657692 | cDNA FLJ39535 fis, clone PUAEN2005502, highly similar to Goodpasture antigen-binding protein (EC 2.7.11.9)                   | 1.40 |      |
| IPI00478127 | Transcription elongation factor A protein-like 3                                                                             | 1.40 |      |
| IPI00003527 | Ezrin-radixin-moesin-binding phosphoprotein 50                                                                               | 1.40 | 0.34 |
| IPI00031397 | Long-chain acyl-CoA synthetase 3                                                                                             | 1.40 | 0.12 |
| IPI00304962 | Alpha-2 type I collagen                                                                                                      | 1.39 | 0.14 |
| IPI00384280 | Prenylcysteine lyase                                                                                                         | 1.39 | 0.13 |
| IPI00221172 | N-recognin-7                                                                                                                 | 1.39 | 0.19 |
| IPI00299214 | Thymidine kinase, cytosolic                                                                                                  | 1.39 | 0.39 |
| IPI00084828 | Syntaxin binding protein 1                                                                                                   | 1.39 |      |
| IPI00103090 | Replicative senescence down-regulated leol1-like protein                                                                     | 1.39 |      |
| IPI00848090 | cDNA, FLJ94534, highly similar to Homo sapiens capping protein (actin filament), gelsolin-like(CAPG), mRNA                   | 1.39 | 0.55 |
| IPI00003348 | G protein subunit beta-2                                                                                                     | 1.39 | 0.19 |
| IPI00002478 | Endothelin-converting enzyme 1                                                                                               | 1.39 | 0.43 |
| IPI00023832 | Adapter protein HOFI                                                                                                         | 1.39 | 0.07 |
| IPI00642238 | Heterochromatin protein 1-binding protein 3                                                                                  | 1.39 | 0.10 |
| IPI00414657 | Chromosome transmission fidelity factor 18 homolog                                                                           | 1.39 | 0.11 |
| IPI00297646 | Alpha-1 type I collagen                                                                                                      | 1.39 | 0.11 |
| IPI00010388 | Centromere protein B                                                                                                         | 1.38 | 0.01 |
| IPI00879287 | Putative uncharacterized protein CDCA5                                                                                       | 1.38 | 0.25 |
| IPI00410717 | Pogo transposable element with ZNF domain                                                                                    | 1.38 | 0.00 |
| IPI00902843 | cDNA FLJ16129 fis, clone BRACE2039823, highly similar to CDP-diacylglycerol--inositol3-phosphatidyltransferase (EC 2.7.8.11) | 1.38 |      |

|                       |                                                                                                        |      |      |
|-----------------------|--------------------------------------------------------------------------------------------------------|------|------|
| IPI00152303           | Phosphatidylinositol-5-phosphate 4-kinase type II gamma                                                | 1.38 | 0.08 |
| IPI00942981           | DDRKG domain-containing protein 1                                                                      | 1.38 |      |
| IPI00382990           | Dermal papilla derived protein 12                                                                      | 1.38 | 1.05 |
| IPI00028911           | Alpha-dystroglycan                                                                                     | 1.38 |      |
| IPI00644697           | Heme-binding protein 2                                                                                 | 1.38 | 0.34 |
| IPI00848174           | cDNA FLJ34950 fis, clone NT2RP7017284, highly similar to Casein kinase I isoform epsilon (EC 2.7.11.1) | 1.38 |      |
| IPI00844090           | Collagen alpha-1(V) chain                                                                              | 1.38 | 0.35 |
| IPI00008726           | Iron regulatory protein 2                                                                              | 1.38 |      |
| IPI00301609           | Nercc1 kinase                                                                                          | 1.38 | 0.22 |
| IPI00447051           | B-cell CLL/lymphoma 7 protein family member C                                                          | 1.37 |      |
| IPI00026268           | Guanine nucleotide-binding protein G(I)/G(S)/G(T) subunit beta-1                                       | 1.37 | 0.17 |
| IPI00175029           | Transmembrane protein 55A                                                                              | 1.37 | 0.28 |
| IPI00004312           | Signal transducer and activator of transcription 2                                                     | 1.37 | 0.30 |
| IPI00102182           | Zinc finger FYVE domain-containing protein 21                                                          | 1.37 |      |
| IPI00029015           | 3-dehydrosphinganine reductase                                                                         | 1.37 |      |
| IPI00219718           | cDNA FLJ76382, highly similar to Homo sapiens retinol binding protein 1, cellular (RBP1), mRNA         | 1.37 |      |
| IPI00337648           | Fas-associated protein-tyrosine phosphatase 1                                                          | 1.37 |      |
| IPI00217541           | ATP-dependent RNA helicase DDX51                                                                       | 1.37 | 1.09 |
| IPI00647389           | EH domain-binding mitotic phosphoprotein                                                               | 1.37 | 0.49 |
| IPI00018311           | Neuroplastin                                                                                           | 1.37 | 0.23 |
| IPI00156984           | Charged multivesicular body protein 1b                                                                 | 1.37 | 0.07 |
| IPI00060521           | FLYWCH family member 2                                                                                 | 1.37 | 0.25 |
| IPI00792186           | ATP-binding cassette sub-family F member 1                                                             | 1.37 | 0.20 |
| IPI00016457           | Carnitine acetyltransferase                                                                            | 1.36 |      |
| IPI00008599           | 3-beta-hydroxysteroid-delta(8),delta(7)-isomerase                                                      | 1.36 |      |
| IPI00550781           | PRKR-interacting protein 1                                                                             | 1.36 | 0.24 |
| IPI00168336           | LEM domain-containing protein 2                                                                        | 1.36 | 0.16 |
|                       |                                                                                                        |      |      |
| <b>Down-regulated</b> |                                                                                                        |      |      |
| IPI00514027           | Heat shock protein 90kDa alpha (Cytosolic), class B member 1                                           | 0.01 |      |
| IPI00413517           | Rho guanine nucleotide exchange factor 10                                                              | 0.08 |      |
| IPI00796114           | cDNA FLJ11889 fis, clone HEMBA1007251, weakly similar to Homo sapiens F-box protein FBX29 (FBX29) mRNA | 0.09 |      |
| IPI00740545           | POTE ankyrin domain family, member I                                                                   | 0.15 | 0.11 |
| IPI00409761           | CHETK-alpha                                                                                            | 0.16 |      |
| IPI00069084           | 350/400 kDa PCAF-associated factor                                                                     | 0.17 |      |
| IPI00163172           | Putative uncharacterized protein SKP2                                                                  | 0.24 |      |
| IPI00299145           | Cytokeratin-6C                                                                                         | 0.29 |      |
| IPI00029728           | Basic transcription factor 2 80 kDa subunit                                                            | 0.31 |      |
| IPI00028980           | Unhealthy ribosome biogenesis protein 2 homolog                                                        | 0.34 |      |
| IPI00299635           | Baculoviral IAP repeat-containing protein 6                                                            | 0.35 | 0.31 |

|             |                                                                                              |      |      |
|-------------|----------------------------------------------------------------------------------------------|------|------|
| IPI00023020 | Alpha-inhibin-31                                                                             | 0.36 |      |
| IPI00293307 | Adipophilin                                                                                  | 0.36 | 0.15 |
| IPI00022628 | cDNA, FLJ93207, highly similar to Homo sapiens microtubule-associated protein 7 (MAP7), mRNA | 0.37 |      |
| IPI00927606 | Cellular glutathione peroxidase                                                              | 0.38 |      |
| IPI00783004 | 1-phosphatidylinositol-4,5-bisphosphate phosphodiesterase beta-4                             | 0.39 | 0.37 |
| IPI00007118 | Endothelial plasminogen activator inhibitor                                                  | 0.41 | 0.05 |
| IPI00016334 | Cell surface glycoprotein MUC18                                                              | 0.42 |      |
| IPI00007253 | Protein TRS85 homolog                                                                        | 0.43 |      |
| IPI00293665 | Cytokeratin-6B                                                                               | 0.44 |      |
| IPI00012215 | UPF0184 protein C9orf16                                                                      | 0.47 |      |
| IPI00021685 | ADP-ribosylation factor-like protein 6                                                       | 0.47 |      |
| IPI00333913 | Neuroblastoma-amplified gene protein                                                         | 0.48 |      |
| IPI00942405 | LSM7 homolog, U6 small nuclear RNA associated                                                | 0.48 |      |
| IPI00010676 | Monocyte activation antigen Mo3                                                              | 0.49 | 0.01 |
| IPI00747787 | Condensin-2 complex subunit D3                                                               | 0.50 |      |
| IPI00018219 | Kerato-epithelin                                                                             | 0.51 | 0.18 |
| IPI00022498 | Metallothionein-2                                                                            | 0.53 |      |
| IPI00166861 | Uncharacterized protein C12orf45                                                             | 0.53 |      |
| IPI00550977 | Coiled-coil domain-containing protein 21                                                     | 0.55 |      |
| IPI00025050 | Tryptophanyl tRNA synthetase 2, mitochondrial                                                | 0.55 | 0.51 |
| IPI00004436 | Cancer-associated Sm-like                                                                    | 0.55 |      |
| IPI00377050 | 13S Golgi transport complex 90 kDa subunit                                                   | 0.55 | 0.45 |
| IPI00027693 | Nuclear body protein SP140-like protein                                                      | 0.55 | 0.00 |
| IPI00396967 | Four and a half LIM-domain protein 2                                                         | 0.55 | 0.11 |
| IPI00030877 | 15 kDa selenoprotein                                                                         | 0.56 | 0.02 |
| IPI00060148 | Coiled-coil domain-containing protein 127                                                    | 0.57 |      |
| IPI00150963 | RNA pseudouridylylase domain-containing protein 2                                            | 0.58 |      |
| IPI00297617 | PH domain leucine-rich repeat-containing protein phosphatase 1                               | 0.58 |      |
| IPI00299219 | CCN family member 1                                                                          | 0.58 | 0.10 |
| IPI00900386 | Putative uncharacterized protein GTPBP3                                                      | 0.58 |      |
| IPI00297357 | Liver-related putative tumor suppressor                                                      | 0.58 |      |
| IPI00004962 | Golgi integral membrane protein 4                                                            | 0.59 | 0.04 |
| IPI00015713 | CDK5 regulatory subunit-associated protein 1-like 1                                          | 0.59 | 0.23 |
| IPI00793181 | Selenoprotein S                                                                              | 0.59 | 0.22 |
| IPI00815672 | Axonal transporter of synaptic vesicles                                                      | 0.60 |      |
| IPI00013735 | FAST kinase domain-containing protein 2                                                      | 0.60 | 0.35 |
| IPI00747478 | Methylmalonic aciduria and homocystinuria type D protein, mitochondrial                      | 0.61 |      |
| IPI00917041 | Putative uncharacterized protein METTL5                                                      | 0.61 | 0.04 |
| IPI00295849 | Geranylgeranyl transferase type II subunit beta                                              | 0.61 |      |
| IPI00414717 | Golgi glycoprotein 1                                                                         | 0.61 | 0.10 |
| IPI00023529 | Cell division protein kinase 6                                                               | 0.61 | 0.12 |
| IPI00016046 | Protein MGR2 homolog                                                                         | 0.62 |      |

|             |                                                                                                                                                            |      |      |
|-------------|------------------------------------------------------------------------------------------------------------------------------------------------------------|------|------|
| IPI00004459 | 18S rRNA dimethylase                                                                                                                                       | 0.62 | 0.09 |
| IPI00008752 | Metallothionein-1G                                                                                                                                         | 0.62 | 0.00 |
| IPI00844311 | Uridine-cytidine kinase-like 1                                                                                                                             | 0.62 |      |
| IPI00025257 | Semaphorin 7A                                                                                                                                              | 0.62 |      |
| IPI00218696 | Caldesmon                                                                                                                                                  | 0.62 |      |
| IPI00178314 | Amisyn                                                                                                                                                     | 0.63 | 0.04 |
| IPI00884192 | Glutathione peroxidase 4                                                                                                                                   | 0.64 | 0.20 |
| IPI00329625 | cDNA FLJ56153, highly similar to Homo sapiens transforming growth factor beta regulator 4 (TBRG4), transcript variant 1, mRNA                              | 0.64 | 0.04 |
| IPI00216135 | Alpha-tropomyosin                                                                                                                                          | 0.64 | 0.10 |
| IPI00941549 | cDNA FLJ75843, highly similar to Homo sapiens pleckstrin homology domain containing, family A (phosphoinositide binding specific) member 2 (PLEKHA2), mRNA | 0.65 |      |
| IPI00412787 | ADP-ribosylation factor-like protein 5A                                                                                                                    | 0.65 |      |
| IPI00556494 | Activator-recruited cofactor 36 kDa component                                                                                                              | 0.66 |      |
| IPI00008750 | Metallothionein-0                                                                                                                                          | 0.66 | 0.01 |
| IPI00384180 | Dopamine receptor-interacting protein 3                                                                                                                    | 0.66 | 0.08 |
| IPI00797887 | cDNA FLJ58199, highly similar to Fragile X mental retardation syndrome-related protein 1                                                                   | 0.66 |      |
| IPI00855785 | Anastellin                                                                                                                                                 | 0.66 |      |
| IPI00553067 | Coiled-coil domain-containing protein 132                                                                                                                  | 0.66 |      |
| IPI00414037 | Uncharacterized protein C9orf93                                                                                                                            | 0.67 |      |
| IPI00480103 | Protein FAM83D                                                                                                                                             | 0.67 | 0.46 |
| IPI00478838 | Fatty acyl-CoA reductase 1                                                                                                                                 | 0.67 | 0.00 |
| IPI00006142 | ARM protein lost in epithelial cancers on chromosome X 2                                                                                                   | 0.67 |      |
| IPI00946154 | Basic fibroblast growth factor                                                                                                                             | 0.67 | 0.05 |
| IPI00419084 | DENN domain-containing protein 5B                                                                                                                          | 0.68 |      |
| IPI00008711 | Wolframin                                                                                                                                                  | 0.68 |      |
| IPI00015953 | DEAD box protein 21                                                                                                                                        | 0.68 | 0.04 |
| IPI00294744 | Deadenylating nuclease                                                                                                                                     | 0.68 |      |
| IPI00153032 | Protein LTV1 homolog                                                                                                                                       | 0.68 | 0.04 |
| IPI00304181 | Eukaryotic translation initiation factor 2C 3                                                                                                              | 0.69 |      |
| IPI00794278 | Anaphase-promoting complex subunit 3                                                                                                                       | 0.69 | 0.71 |
| IPI00456429 | 60S ribosomal protein L40                                                                                                                                  | 0.69 |      |
| IPI00929268 | cDNA FLJ57057, highly similar to Small subunit processome component 20 homolog                                                                             | 0.69 | 0.09 |
| IPI00014310 | Cullin-1                                                                                                                                                   | 0.69 | 0.45 |
| IPI00604527 | Threonine--tRNA ligase                                                                                                                                     | 0.69 | 0.01 |
| IPI00010130 | Glutamate decarboxylase                                                                                                                                    | 0.70 | 0.19 |
| IPI00646899 | Putative uncharacterized protein RPL10                                                                                                                     | 0.70 |      |
| IPI00009365 | Cytochrome c oxidase assembly protein COX16 homolog, mitochondrial                                                                                         | 0.70 | 0.09 |
| IPI00646748 | Tropomyosin 2 (Beta)                                                                                                                                       | 0.70 |      |
| IPI00011307 | Bifunctional methylenetetrahydrofolate dehydrogenase/cyclohydrolase, mitochondrial                                                                         | 0.71 | 0.04 |
| IPI00001541 | Mitochondrial import inner membrane translocase subunit Tim9                                                                                               | 0.71 | 0.12 |

|             |                                                                  |      |      |
|-------------|------------------------------------------------------------------|------|------|
| IPI00470498 | PAI1 RNA-binding protein 1                                       | 0.71 | 0.12 |
| IPI00217630 | DEAH box protein 37                                              | 0.71 |      |
| IPI00019004 | Translocation protein 1                                          | 0.72 | 0.11 |
| IPI00024579 | E3 ubiquitin-protein ligase RAD18                                | 0.72 | 0.16 |
| IPI00514399 | Putative uncharacterized protein RPS27                           | 0.72 | 0.10 |
| IPI00829835 | G patch domain-containing protein 4                              | 0.72 |      |
| IPI00554777 | Asparagine synthetase [glutamine-hydrolyzing]                    | 0.72 | 0.06 |
| IPI00152708 | U3 small nucleolar RNA-associated protein 15 homolog             | 0.72 | 0.03 |
| IPI00009335 | Brain protein 16                                                 | 0.72 | 0.02 |
| IPI00657953 | PTPRF-interacting protein                                        | 0.72 |      |
| IPI00873982 | Myosin heavy chain 11 smooth muscle isoform                      | 0.72 |      |
| IPI00871704 | Putative uncharacterized protein DIAPH3                          | 0.72 | 0.12 |
| IPI00015916 | Bone-derived growth factor                                       | 0.73 |      |
| IPI00003310 | RPB11a protein                                                   | 0.73 |      |
| IPI00791720 | Protein Smaug homolog 2                                          | 0.73 |      |
| IPI00291646 | Methylenetetrahydrofolate dehydrogenase (NADP+ dependent) 1-like | 0.73 | 0.03 |
| IPI00446294 | Target of Myb-like protein 2                                     | 0.73 |      |
| IPI00759776 | Alpha actin 1                                                    | 0.73 |      |
| IPI00024425 | Putative uncharacterized protein KIAA0664                        | 0.73 |      |
| IPI00384471 | Bromodomain containing 1                                         | 0.73 |      |
| IPI00016207 | Inner membrane preprotein translocase Tim17a                     | 0.73 |      |
| IPI00216674 | Apoptotic protease Mch-3                                         | 0.73 |      |
| IPI00794521 | Putative uncharacterized protein DKFZp434J046                    | 0.73 |      |
| IPI00014516 | Caldesmon                                                        | 0.73 | 0.06 |
| IPI00396329 | Brix domain-containing protein 1                                 | 0.73 | 0.02 |
| IPI00456899 | RING finger protein 169                                          | 0.74 |      |
| IPI00298928 | Leucine-rich repeat protein SHOC-2                               | 0.74 |      |
| IPI00065671 | Cytidine monophosphokinase 2                                     | 0.74 | 0.13 |
| IPI00219153 | 60S ribosomal protein L22                                        | 0.74 | 0.20 |
| IPI00909247 | cDNA FLJ51655, highly similar to Actin-like protein 2            | 0.74 |      |
| IPI00006050 | Family with sequence similarity 115, member A                    | 0.74 |      |
| IPI00009943 | Tumor protein, translationally-controlled 1                      | 0.74 | 0.02 |
| IPI00642369 | cDNA FLJ60364, highly similar to Stat3-interacting protein       | 0.74 |      |
| IPI00829741 | Ankyrin repeat and LEM domain-containing protein 2               | 0.74 |      |
| IPI00019835 | Bcl-2-like protein 12                                            | 0.74 | 0.14 |

**Table S4.** Pathways perturbed by potassium dichromate treatment, as identified by GenMAPP analysis. (A) Summary of significantly perturbed pathways. (B) List of proteins involved in the perturbed pathways.

(A)

| MAPP Name                           | Number Changed | Number Measured | Number on MAPP | Percent Changed | Percent Present | Z Score |
|-------------------------------------|----------------|-----------------|----------------|-----------------|-----------------|---------|
| <b>Down-regulated Pathway</b>       |                |                 |                |                 |                 |         |
| Selenium Pathway                    | 3              | 24              | 87             | 12.5            | 27.6            | 3.0     |
| <b>Up-regulated Pathway</b>         |                |                 |                |                 |                 |         |
| Cholesterol Biosynthesis            | 13             | 16              | 21             | 81.3            | 76.2            | 11.1    |
| Signal Transduction of S1P Receptor | 3              | 7               | 24             | 42.9            | 29.2            | 3.8     |
| Inflammatory Response Pathway       | 3              | 8               | 32             | 37.5            | 25.0            | 3.4     |
| IL-5 Signaling Pathway              | 6              | 29              | 70             | 20.7            | 41.4            | 3.0     |
| estrogen signalling                 | 3              | 10              | 23             | 30.0            | 43.5            | 2.9     |
| G Protein Signaling Pathways        | 6              | 32              | 94             | 18.8            | 34.0            | 2.7     |

(B)

| IPI NO.                         | Symbol      | Protein Name                                      | Ratio     |
|---------------------------------|-------------|---------------------------------------------------|-----------|
| <b>Down-regulate Pathway</b>    |             |                                                   |           |
| <b>Selenium Pathway</b>         |             |                                                   |           |
| IPI00030877                     | RP4-604K5.1 | 15 kDa selenoprotein                              | 0.56±0.02 |
| IPI00007118                     | SERPINE1    | Endothelial plasminogen activator inhibitor       | 0.41±0.05 |
| IPI00793181                     | AC023024.1  | Selenoprotein S                                   | 0.59±0.22 |
| <b>Up-regulated Pathway</b>     |             |                                                   |           |
| <b>Cholesterol Biosynthesis</b> |             |                                                   |           |
| IPI00019407                     | NSDHL       | NAD(P)H steroid dehydrogenase                     | 1.45±0.09 |
| IPI00914566                     | FDPS        | Farnesyl diphosphate synthetase                   | 2.04±0.11 |
| IPI00022745                     | MVD         | Mevalonate-PP decarboxylase                       | 1.59±0.28 |
| IPI00009747                     | LSS         | Lanosterol cyclase                                | 1.66±0.03 |
| IPI00008599                     | EBP         | 3-beta-hydroxysteroid-delta(8),delta(7)-isomerase | 1.36      |
| IPI00008475                     | HMGCS1      | HMG-CoA synthase                                  | 4.10±0.86 |
| IPI00295772                     | CYP51A1     | Lanosterol 14 alpha-demethylase                   | 1.78±0.06 |
| IPI00020944                     | FDFT1       | Squalene synthase                                 | 4.19±0.67 |
| IPI00294501                     | DHCR7       | 7-dehydrocholesterol reductase                    | 2.13±0.09 |
| IPI00010717                     | MVK         | Mevalonate kinase                                 | 2.04      |
| IPI00220014                     | IDI1        | Isopentenyl-PP-delta-isomerase                    | 3.17±0.36 |
| IPI00291419                     | ACAT2       | Acetoacetyl-CoA acetyltransferase-2               | 1.68±0.12 |
| IPI00016703                     | DHCR24      | Desmosterol reductase                             | 2.05±0.56 |

|                                            |         |                                                                   |           |
|--------------------------------------------|---------|-------------------------------------------------------------------|-----------|
|                                            |         |                                                                   |           |
| <b>Signal Transduction of S1P Receptor</b> |         |                                                                   |           |
| IPI00018195                                | MAPK3   | Mitogen-activated protein kinase 3                                | 1.40±0.15 |
| IPI00012866                                | AKT1    | Protein kinase B                                                  | 1.49±0.18 |
| IPI00220578                                | GNAI3   | G(i) alpha-3                                                      | 1.49±0.27 |
|                                            |         |                                                                   |           |
| <b>Inflammatory Response Pathway</b>       |         |                                                                   |           |
| IPI00021033                                | COL3A1  | Collagen alpha-1(III) chain                                       | 2.14±0.50 |
| IPI00297646                                | COL1A1  | Alpha-1 type I collagen                                           | 1.39±0.11 |
| IPI00304962                                | COL1A2  | Alpha-2 type I collagen                                           | 1.39±0.14 |
|                                            |         |                                                                   |           |
| <b>IL-5 Signaling Pathway</b>              |         |                                                                   |           |
| IPI00784013                                | JAK1    | Janus kinase 1                                                    | 1.40±0.09 |
| IPI00011736                                | PIK3R2  | Phosphatidylinositol 3-kinase 85 kDa regulatory subunit beta      | 1.52±0.39 |
| IPI00012866                                | AKT1    | Protein kinase B                                                  | 1.49±0.18 |
| IPI00219628                                | PRKCB   | Protein kinase C beta type                                        | 1.96      |
| IPI00299086                                | SDCBP   | Melanoma differentiation-associated protein 9                     | 1.80±0.22 |
| IPI00018195                                | MAPK3   | Mitogen-activated protein kinase 3                                | 1.40±0.15 |
|                                            |         |                                                                   |           |
| <b>Estrogen Signalling</b>                 |         |                                                                   |           |
| IPI00027713                                | CREB1   | Cyclic AMP-responsive element-binding protein 1                   | 1.43      |
| IPI00026268                                | GNB1    | Guanine nucleotide-binding protein G(I)/G(S)/G(T) subunit beta-1  | 1.37±0.17 |
| IPI00012866                                | AKT1    | Protein kinase B                                                  | 1.49±0.18 |
|                                            |         |                                                                   |           |
| <b>G Protein Signaling Pathways</b>        |         |                                                                   |           |
| IPI00027240                                | GNG5    | Guanine nucleotide-binding protein G(I)/G(S)/G(O) subunit gamma-5 | 1.93±0.01 |
| IPI00220578                                | GNAI3   | G(i) alpha-3                                                      | 1.49±0.27 |
| IPI00303297                                | DNAJC25 | DnaJ homolog subfamily C member 25                                | 1.80      |
| IPI00026268                                | GNB1    | Guanine nucleotide-binding protein G(I)/G(S)/G(T) subunit beta-1  | 1.37±0.17 |
| IPI00003348                                | GNB2    | G protein subunit beta-2                                          | 1.39±0.19 |
| IPI00219628                                | PRKCB   | Protein kinase C beta type                                        | 1.96      |

**Table S5.** GO annotation of significantly changed proteins by potassium dichromate treatment, as identified by GenMAPP analysis. (A) Summary of GO types. (B) List of proteins involved in different GO types.

(A)

| GO Name                                              | Number Changed | Number Measured | Number in GO | Percent Changed | Percent Present | Z Score |
|------------------------------------------------------|----------------|-----------------|--------------|-----------------|-----------------|---------|
| <b>Down-regulated GO Type</b>                        |                |                 |              |                 |                 |         |
| <b>Biological Process</b>                            |                |                 |              |                 |                 |         |
| tissue regeneration                                  | 3              | 9               | 35           | 33.3            | 25.7            | 5.8     |
| regulation of inflammatory response                  | 4              | 16              | 135          | 25.0            | 11.9            | 5.6     |
| cellular divalent inorganic cation homeostasis       | 5              | 24              | 208          | 20.8            | 11.5            | 5.6     |
| regulation of cell-matrix adhesion                   | 3              | 11              | 43           | 27.3            | 25.6            | 5.1     |
| wound healing                                        | 4              | 19              | 70           | 21.1            | 27.1            | 5.0     |
| muscle cell development                              | 3              | 12              | 40           | 25.0            | 30.0            | 4.9     |
|                                                      |                |                 |              |                 |                 |         |
| <b>Cellular Component</b>                            |                |                 |              |                 |                 |         |
| contractile fiber                                    | 3              | 9               | 40           | 33.3            | 22.5            | 5.8     |
| platelet alpha granule lumen                         | 3              | 10              | 48           | 30.0            | 20.8            | 5.4     |
| contractile fiber part                               | 5              | 37              | 125          | 13.5            | 29.6            | 4.2     |
| actin filament bundle                                | 3              | 25              | 39           | 12.0            | 64.1            | 2.9     |
| extracellular region                                 | 10             | 160             | 2036         | 6.3             | 7.9             | 2.9     |
|                                                      |                |                 |              |                 |                 |         |
| <b>Molecular Function</b>                            |                |                 |              |                 |                 |         |
| heparin binding                                      | 4              | 16              | 126          | 25.0            | 12.7            | 5.6     |
| extracellular matrix binding                         | 3              | 13              | 39           | 23.1            | 33.3            | 4.6     |
| structural constituent of muscle                     | 3              | 14              | 45           | 21.4            | 31.1            | 4.4     |
| integrin binding                                     | 4              | 26              | 78           | 15.4            | 33.3            | 4.1     |
| antioxidant activity                                 | 3              | 22              | 57           | 13.6            | 38.6            | 3.2     |
|                                                      |                |                 |              |                 |                 |         |
| <b>Up-regulated GO Type</b>                          |                |                 |              |                 |                 |         |
| <b>Biological Process</b>                            |                |                 |              |                 |                 |         |
| cholesterol biosynthetic process                     | 13             | 18              | 33           | 72.2            | 54.5            | 10.8    |
| epidermis development                                | 9              | 27              | 152          | 33.3            | 17.8            | 5.9     |
| skeletal system development                          | 9              | 30              | 175          | 30.0            | 17.1            | 5.5     |
| cell-cell signaling                                  | 13             | 73              | 637          | 17.8            | 11.5            | 4.2     |
| digestive system process                             | 3              | 7               | 38           | 42.9            | 18.4            | 4.1     |
| homophilic cell adhesion                             | 3              | 7               | 137          | 42.9            | 5.1             | 4.1     |
| G-protein coupled receptor protein signaling pathway | 6              | 33              | 1127         | 18.2            | 2.9             | 2.9     |
|                                                      |                |                 |              |                 |                 |         |
| <b>Cellular Component</b>                            |                |                 |              |                 |                 |         |
| fibrillar collagen                                   | 5              | 6               | 12           | 83.3            | 50.0            | 7.9     |



| GO Name                                       | Number Changed | Number Measured | Number in GO | Percent Changed | Percent Present | Z Score |
|-----------------------------------------------|----------------|-----------------|--------------|-----------------|-----------------|---------|
| extrinsic to internal side of plasma membrane | 6              | 14              | 50           | 42.9            | 28.0            | 5.8     |
| extracellular matrix                          | 12             | 50              | 330          | 24.0            | 15.2            | 5.3     |
| basement membrane                             | 6              | 22              | 78           | 27.3            | 28.2            | 4.2     |
| extracellular region                          | 22             | 160             | 2036         | 13.8            | 7.9             | 4.1     |
| G-protein-coupled receptor binding            | 46             | 481             | 3659         | 9.6             | 13.1            | 3.4     |
| <b>Molecular Function</b>                     |                |                 |              |                 |                 |         |
| platelet-derived growth factor binding        | 4              | 6               | 11           | 66.7            | 54.5            | 6.2     |
| extracellular matrix structural constituent   | 8              | 22              | 87           | 36.4            | 25.3            | 5.9     |
| beta-amyloid binding                          | 3              | 5               | 22           | 60.0            | 22.7            | 5.0     |
| calcium ion binding                           | 18             | 128             | 764          | 14.1            | 16.8            | 3.8     |
| integrin binding                              | 6              | 26              | 78           | 23.1            | 33.3            | 3.6     |

(B)

| IPI NO.                                               | Symbol     | Protein Name                                | Ratio     |
|-------------------------------------------------------|------------|---------------------------------------------|-----------|
| <b>Down-regulated GO Type</b>                         |            |                                             |           |
| <b>Biological Process</b>                             |            |                                             |           |
| <b>Tissue Regeneration</b>                            |            |                                             |           |
| IPI00010676                                           | PLAUR      | Monocyte activation antigen Mo3             | 0.49±0.01 |
| IPI00007118                                           | SERPINE1   | Endothelial plasminogen activator inhibitor | 0.41±0.05 |
| IPI00927606                                           | GPX1       | Cellular glutathione peroxidase             | 0.38      |
| <b>Regulation of Inflammatory Response</b>            |            |                                             |           |
| IPI00793181                                           | AC023024.1 | Selenoprotein S                             | 0.59±0.22 |
| IPI00025257                                           | SEMA7A     | Semaphorin 7A                               | 0.62      |
| IPI00007118                                           | SERPINE1   | Endothelial plasminogen activator inhibitor | 0.41±0.05 |
| IPI00927606                                           | GPX1       | Cellular glutathione peroxidase             | 0.38      |
| <b>Cellular Divalent Inorganic Cation Homeostasis</b> |            |                                             |           |
| IPI00009943                                           | TPT1       | Tumor protein, translationally-controlled 1 | 0.74±0.02 |
| IPI00008750                                           | MT1H       | Metallothionein-0                           | 0.66±0.01 |
| IPI00022498                                           | MT2A       | Metallothionein-2                           | 0.53      |
| IPI00008711                                           | WFS1       | Wolframin                                   | 0.68      |
| IPI00946154                                           | FGF2       | Basic fibroblast growth factor              | 0.67±0.05 |
| <b>Regulation of Cell-matrix Adhesion</b>             |            |                                             |           |
| IPI00023529                                           | CDK6       | Cell division protein kinase 6              | 0.61±0.12 |
| IPI00007118                                           | SERPINE1   | Endothelial plasminogen activator inhibitor | 0.41±0.05 |

| <b>IPI NO.</b>                      | <b>Symbol</b> | <b>Protein Name</b>                                                                                                                                        | <b>Ratio</b> |
|-------------------------------------|---------------|------------------------------------------------------------------------------------------------------------------------------------------------------------|--------------|
| IPI00941549                         | PLEKHA2       | cDNA FLJ75843, highly similar to Homo sapiens pleckstrin homology domain containing, family A (phosphoinositide binding specific) member 2 (PLEKHA2), mRNA | 0.65         |
| <b>Wound Healing</b>                |               |                                                                                                                                                            |              |
| IPI00855785                         | FN1           | Anastellin                                                                                                                                                 | 0.66         |
| IPI00007118                         | SERPINE1      | Endothelial plasminogen activator inhibitor                                                                                                                | 0.41±0.05    |
| IPI00216135                         | TPM1          | Alpha-tropomyosin                                                                                                                                          | 0.64±0.10    |
| IPI00946154                         | FGF2          | Basic fibroblast growth factor                                                                                                                             | 0.67±0.05    |
| <b>Muscle Cell Development</b>      |               |                                                                                                                                                            |              |
| IPI00396967                         | FHL2          | Four and a half LIM-domain protein 2                                                                                                                       | 0.55±0.11    |
| IPI00873982                         | MYH11         | Myosin heavy chain 11 smooth muscle isoform                                                                                                                | 0.72         |
| IPI00927606                         | GPX1          | Cellular glutathione peroxidase                                                                                                                            | 0.38         |
| <b>Cellular Component</b>           |               |                                                                                                                                                            |              |
| <b>Contractile Fiber</b>            |               |                                                                                                                                                            |              |
| IPI00014516                         | CALD1         | Caldesmon                                                                                                                                                  | 0.73±0.06    |
| IPI00216135                         | TPM1          | Alpha-tropomyosin                                                                                                                                          | 0.64±0.10    |
| IPI00873982                         | MYH11         | Myosin heavy chain 11 smooth muscle isoform                                                                                                                | 0.72         |
| <b>Platelet Alpha Granule Lumen</b> |               |                                                                                                                                                            |              |
| IPI00855785                         | FN1           | Anastellin                                                                                                                                                 | 0.66         |
| IPI00007118                         | SERPINE1      | Endothelial plasminogen activator inhibitor                                                                                                                | 0.41±0.05    |
| IPI00759776                         | ACTN1         | Alpha actin 1                                                                                                                                              | 0.73         |
| <b>Contractile Fiber Part</b>       |               |                                                                                                                                                            |              |
| IPI00396967                         | FHL2          | Four and a half LIM-domain protein 2                                                                                                                       | 0.55±0.11    |
| IPI00646748                         | TPM2          | Tropomyosin 2 (Beta)                                                                                                                                       | 0.70         |
| IPI00216135                         | TPM1          | Alpha-tropomyosin                                                                                                                                          | 0.64±0.10    |
| IPI00873982                         | MYH11         | Myosin heavy chain 11 smooth muscle isoform                                                                                                                | 0.72         |
| IPI00759776                         | ACTN1         | Alpha actin 1                                                                                                                                              | 0.73         |
| <b>Actin Filament Bundle</b>        |               |                                                                                                                                                            |              |
| IPI00216135                         | TPM1          | Alpha-tropomyosin                                                                                                                                          | 0.64±0.10    |
| IPI00873982                         | MYH11         | Myosin heavy chain 11 smooth muscle isoform                                                                                                                | 0.72         |
| IPI00759776                         | ACTN1         | Alpha actin 1                                                                                                                                              | 0.73         |
| <b>Extracellular Region</b>         |               |                                                                                                                                                            |              |
| IPI00855785                         | FN1           | Anastellin                                                                                                                                                 | 0.66         |
| IPI00018219                         | TGFBI         | Kerato-epithelin                                                                                                                                           | 0.51±0.18    |

| <b>IPI NO.</b>                          | <b>Symbol</b> | <b>Protein Name</b>                                                                                                                                        | <b>Ratio</b> |
|-----------------------------------------|---------------|------------------------------------------------------------------------------------------------------------------------------------------------------------|--------------|
| IPI00010676                             | PLAUR         | Monocyte activation antigen Mo3                                                                                                                            | 0.49±0.01    |
| IPI00299219                             | CYR61         | CCN family member 1                                                                                                                                        | 0.58±0.10    |
| IPI00023020                             | SEMG1         | Alpha-inhibin-31                                                                                                                                           | 0.36         |
| IPI00293307                             | PLIN2         | Adipophilin                                                                                                                                                | 0.36±0.15    |
| IPI00946154                             | FGF2          | Basic fibroblast growth factor                                                                                                                             | 0.67±0.05    |
| IPI00740545                             | POTEI         | POTE ankyrin domain family, member I                                                                                                                       | 0.15±0.11    |
| IPI00007118                             | SERPINE1      | Endothelial plasminogen activator inhibitor                                                                                                                | 0.41±0.05    |
| IPI00759776                             | ACTN1         | Alpha actin 1                                                                                                                                              | 0.73         |
| <b>Molecular Function</b>               |               |                                                                                                                                                            |              |
| <b>Heparin Binding</b>                  |               |                                                                                                                                                            |              |
| IPI00855785                             | FN1           | Anastellin                                                                                                                                                 | 0.66         |
| IPI00299219                             | CYR61         | CCN family member 1                                                                                                                                        | 0.58±0.10    |
| IPI00946154                             | FGF2          | Basic fibroblast growth factor                                                                                                                             | 0.67±0.05    |
| IPI00219153                             | RPL22         | 60S ribosomal protein L22                                                                                                                                  | 0.74±0.20    |
| <b>Extracellular Matrix Binding</b>     |               |                                                                                                                                                            |              |
| IPI00018219                             | TGFBI         | Kerato-epithelin                                                                                                                                           | 0.51±0.18    |
| IPI00299219                             | CYR61         | CCN family member 1                                                                                                                                        | 0.58±0.10    |
| IPI00941549                             | PLEKHA2       | cDNA FLJ75843, highly similar to Homo sapiens pleckstrin homology domain containing, family A (phosphoinositide binding specific) member 2 (PLEKHA2), mRNA | 0.65         |
| <b>Structural Constituent of Muscle</b> |               |                                                                                                                                                            |              |
| IPI00646748                             | TPM2          | Tropomyosin 2 (Beta)                                                                                                                                       | 0.70         |
| IPI00216135                             | TPM1          | Alpha-tropomyosin                                                                                                                                          | 0.64±0.10    |
| IPI00873982                             | MYH11         | Myosin heavy chain 11 smooth muscle isoform                                                                                                                | 0.72         |
| <b>Integrin Binding</b>                 |               |                                                                                                                                                            |              |
| IPI00018219                             | TGFBI         | Kerato-epithelin                                                                                                                                           | 0.51±0.18    |
| IPI00025257                             | SEMA7A        | Semaphorin 7A                                                                                                                                              | 0.62         |
| IPI00299219                             | CYR61         | CCN family member 1                                                                                                                                        | 0.58±0.10    |
| IPI00759776                             | ACTN1         | Alpha actin 1                                                                                                                                              | 0.73         |
| <b>Antioxidant Activity</b>             |               |                                                                                                                                                            |              |
| IPI00793181                             | AC023024.1    | Selenoprotein S                                                                                                                                            | 0.59±0.22    |
| IPI00030877                             | RP4-604K5.1   | 15 kDa selenoprotein                                                                                                                                       | 0.56±0.02    |
| IPI00927606                             | GPX1          | Cellular glutathione peroxidase                                                                                                                            | 0.38         |
| <b>Up-regulated GO Type</b>             |               |                                                                                                                                                            |              |
| <b>Biological Process</b>               |               |                                                                                                                                                            |              |

| IPI NO.                                 | Symbol   | Protein Name                                                      | Ratio     |
|-----------------------------------------|----------|-------------------------------------------------------------------|-----------|
| <b>Cholesterol Biosynthetic Process</b> |          |                                                                   |           |
| IPI00019407                             | NSDHL    | NAD(P)H steroid dehydrogenase                                     | 1.45±0.09 |
| IPI00914566                             | FDPS     | Farnesyl diphosphate synthetase                                   | 2.04±0.11 |
| IPI00008475                             | HMGCS1   | HMG-CoA synthase                                                  | 4.10±0.86 |
| IPI00022745                             | MVD      | Mevalonate-PP decarboxylase                                       | 1.59±0.28 |
| IPI00009747                             | LSS      | Lanosterol cyclase                                                | 1.66±0.03 |
| IPI00008599                             | EBP      | 3-beta-hydroxysteroid-delta(8),delta(7)-isomerase                 | 1.36      |
| IPI00016703                             | DHCR24   | Desmosterol reductase                                             | 2.05±0.56 |
| IPI00295772                             | CYP51A1  | Lanosterol 14 alpha-demethylase                                   | 1.78±0.06 |
| IPI00020944                             | FDFT1    | Squalene synthase                                                 | 4.19±0.67 |
| IPI00294501                             | DHCR7    | 7-dehydrocholesterol reductase                                    | 2.13±0.09 |
| IPI00010717                             | MVK      | Mevalonate kinase                                                 | 2.04      |
| IPI00291419                             | ACAT2    | Acetoacetyl-CoA acetyltransferase-2                               | 1.68±0.12 |
| IPI00220014                             | IDI1     | Isopentenyl-PP-delta-isomerase                                    | 3.17±0.36 |
|                                         |          |                                                                   |           |
| <b>Epidermis Development</b>            |          |                                                                   |           |
| IPI00019407                             | NSDHL    | NAD(P)H steroid dehydrogenase                                     | 1.45±0.09 |
| IPI00220327                             | KRT1     | 67 kDa cytokeratin                                                | 4.01±6.75 |
| IPI00016703                             | DHCR24   | Desmosterol reductase                                             | 2.05±0.56 |
| IPI00478390                             | CDKN2A   | Cyclin-dependent kinase inhibitor 2A, isoform 4                   | 1.58      |
| IPI00216088                             | CRABP2   | Cellular retinoic acid-binding protein 2                          | 1.49±0.05 |
| IPI00739099                             | COL5A2   | Collagen alpha-2(V) chain                                         | 1.65±0.64 |
| IPI00021033                             | COL3A1   | Collagen alpha-1(III) chain                                       | 2.14±0.50 |
| IPI00297646                             | COL1A1   | Alpha-1 type I collagen                                           | 1.39±0.11 |
| IPI00844090                             | COL5A1   | Collagen alpha-1(V) chain                                         | 1.38±0.35 |
| <b>Skeletal System Development</b>      |          |                                                                   |           |
| IPI00739099                             | COL5A2   | Collagen alpha-2(V) chain                                         | 1.65±0.64 |
| IPI00008599                             | EBP      | 3-beta-hydroxysteroid-delta(8),delta(7)-isomerase                 | 1.36      |
| IPI00395596                             | AES      | Amino-terminal enhancer of split                                  | 2.03      |
| IPI00023832                             | SH3PXD2B | Adapter protein HOFI                                              | 1.39±0.07 |
| IPI00021033                             | COL3A1   | Collagen alpha-1(III) chain                                       | 2.14±0.50 |
| IPI00465431                             | LGALS3   | 35 kDa lectin                                                     | 1.59±0.07 |
| IPI00304227                             | CDH11    | Cadherin-11                                                       | 1.83      |
| IPI00304962                             | COL1A2   | Alpha-2 type I collagen                                           | 1.39±0.14 |
| IPI00297646                             | COL1A1   | Alpha-1 type I collagen                                           | 1.39±0.11 |
|                                         |          |                                                                   |           |
| <b>Cell-cell Signaling</b>              |          |                                                                   |           |
| IPI00024307                             | EFNB1    | Ephrin-B1                                                         | 1.63      |
| IPI00027240                             | GNG5     | Guanine nucleotide-binding protein G(I)/G(S)/G(O) subunit gamma-5 | 1.93±0.01 |
| IPI00220578                             | GNAI3    | G(i) alpha-3                                                      | 1.49±0.27 |

| <b>IPI NO.</b>                                              | <b>Symbol</b> | <b>Protein Name</b>                                               | <b>Ratio</b> |
|-------------------------------------------------------------|---------------|-------------------------------------------------------------------|--------------|
| IPI00027713                                                 | CREB1         | Cyclic AMP-responsive element-binding protein 1                   | 1.43         |
| IPI00026268                                                 | GNB1          | Guanine nucleotide-binding protein G(I)/G(S)/G(T) subunit beta-1  | 1.37±0.17    |
| IPI00003348                                                 | GNB2          | G protein subunit beta-2                                          | 1.39±0.19    |
| IPI00247063                                                 | MME           | Atriopeptidase                                                    | 1.64±0.33    |
| IPI00084828                                                 | STXBP1        | Syntaxin binding protein 1                                        | 1.39         |
| IPI00219628                                                 | PRKCB         | Protein kinase C beta type                                        | 1.96         |
| IPI00299086                                                 | SDCBP         | Melanoma differentiation-associated protein 9                     | 1.80±0.22    |
| IPI00027462                                                 | S100A9        | Calgranulin-B                                                     | 10.60        |
| IPI00012069                                                 | NQO1          | Azoreductase                                                      | 1.49±0.61    |
| IPI00402231                                                 | DNAJC5        | Cysteine string protein                                           | 1.43±0.12    |
| <b>Digestive System Process</b>                             |               |                                                                   |              |
| IPI00000070                                                 | LDLR          | Low-density lipoprotein receptor                                  | 3.21±0.90    |
| IPI00008726                                                 | IREB2         | Iron regulatory protein 2                                         | 1.38         |
| IPI00022990                                                 | STATH         | Statherin                                                         | 11.11        |
| <b>Homophilic Cell Adhesion</b>                             |               |                                                                   |              |
| IPI00304227                                                 | CDH11         | Cadherin-11                                                       | 1.83         |
| IPI00107831                                                 | PTPRF         | Leukocyte common antigen related                                  | 2.18         |
| IPI00018311                                                 | NPTN          | Neuroplastin                                                      | 1.37±0.23    |
| <b>G-protein coupled receptor protein signaling pathway</b> |               |                                                                   |              |
| IPI00027240                                                 | GNG5          | Guanine nucleotide-binding protein G(I)/G(S)/G(O) subunit gamma-5 | 1.93±0.01    |
| IPI00220578                                                 | GNAI3         | G(i) alpha-3                                                      | 1.49±0.27    |
| IPI00303297                                                 | DNAJC25       | DnaJ homolog subfamily C member 25                                | 1.80         |
| IPI00026268                                                 | GNB1          | Guanine nucleotide-binding protein G(I)/G(S)/G(T) subunit beta-1  | 1.37±0.17    |
| IPI00012866                                                 | AKT1          | Protein kinase B                                                  | 1.49±0.18    |
| IPI00003348                                                 | GNB2          | G protein subunit beta-2                                          | 1.39±0.19    |
| <b>Cellular Component</b>                                   |               |                                                                   |              |
| <b>Fibrillar Collagen</b>                                   |               |                                                                   |              |
| IPI00844090                                                 | COL5A1        | Collagen alpha-1(V) chain                                         | 1.38±0.35    |
| IPI00021033                                                 | COL3A1        | Collagen alpha-1(III) chain                                       | 2.14±0.50    |
| IPI00739099                                                 | COL5A2        | Collagen alpha-2(V) chain                                         | 1.65±0.64    |
| IPI00304962                                                 | COL1A2        | Alpha-2 type I collagen                                           | 1.39±0.14    |
| IPI00297646                                                 | COL1A1        | Alpha-1 type I collagen                                           | 1.39±0.11    |
| <b>Extrinsic to Internal Side of Plasma Membrane</b>        |               |                                                                   |              |
| IPI00027240                                                 | GNG5          | Guanine nucleotide-binding protein G(I)/G(S)/G(O) subunit gamma-5 | 1.93±0.01    |
| IPI00220578                                                 | GNAI3         | G(i) alpha-3                                                      | 1.49±0.27    |

| <b>IPI NO.</b>              | <b>Symbol</b> | <b>Protein Name</b>                                              | <b>Ratio</b> |
|-----------------------------|---------------|------------------------------------------------------------------|--------------|
| IPI00303297                 | DNAJC25       | DnaJ homolog subfamily C member 25                               | 1.80         |
| IPI00026268                 | GNB1          | Guanine nucleotide-binding protein G(I)/G(S)/G(T) subunit beta-1 | 1.37±0.17    |
| IPI00027463                 | S100A6        | Calcyclin                                                        | 1.46         |
| IPI00303297                 | DNAJC25       | DnaJ homolog subfamily C member 25                               | 1.80         |
| IPI00001883                 | SNX9          | SH3 and PX domain-containing protein 1                           | 1.48         |
|                             |               |                                                                  |              |
| <b>Extracellular Matrix</b> |               |                                                                  |              |
| IPI00006971                 | CD248         | Endosialin                                                       | 1.51         |
| IPI00299738                 | PCOLCE        | Procollagen C-endopeptidase enhancer 1                           | 1.78±0.16    |
| IPI00218803                 | FBLN1         | Fibulin-1                                                        | 1.47         |
| IPI00645849                 | ECM1          | Extracellular matrix protein 1                                   | 1.70±0.20    |
| IPI00844090                 | COL5A1        | Collagen alpha-1(V) chain                                        | 1.38±0.35    |
| IPI00739099                 | COL5A2        | Collagen alpha-2(V) chain                                        | 1.65±0.64    |
| IPI00027166                 | TIMP2         | TIMP metalloproteinase inhibitor 2                               | 1.51±0.36    |
| IPI00021033                 | COL3A1        | Collagen alpha-1(III) chain                                      | 2.14±0.50    |
| IPI00465431                 | LGALS3        | 35 kDa lectin                                                    | 1.59±0.07    |
| IPI00297646                 | COL1A1        | Alpha-1 type I collagen                                          | 1.39±0.11    |
| IPI00176193                 | COL14A1       | Collagen alpha-1(XIV) chain                                      | 3.33±4.49    |
| IPI00304962                 | COL1A2        | Alpha-2 type I collagen                                          | 1.39±0.14    |
|                             |               |                                                                  |              |
| <b>Basement Membrane</b>    |               |                                                                  |              |
| IPI00028911                 | DAG1          | Alpha-dystroglycan                                               | 1.38         |
| IPI00218803                 | FBLN1         | Fibulin-1                                                        | 1.47         |
| IPI00027166                 | TIMP2         | TIMP metalloproteinase inhibitor 2                               | 1.51±0.36    |
| IPI00844090                 | COL5A1        | Collagen alpha-1(V) chain                                        | 1.38±0.35    |
| IPI00642259                 | DST           | 230 kDa bullous pemphigoid antigen                               | 1.64±0.97    |
| IPI00032293                 | CST3          | Cystatin-3                                                       | 1.41±0.28    |
|                             |               |                                                                  |              |
| <b>Extracellular Region</b> |               |                                                                  |              |
| IPI00028911                 | DAG1          | Alpha-dystroglycan                                               | 1.38         |
| IPI00299738                 | PCOLCE        | Procollagen C-endopeptidase enhancer 1                           | 1.78±0.16    |
| IPI00410297                 | HPSE          | Endo-glucuronidase                                               | 2.45         |
| IPI00329598                 | HSD17B11      | 17-beta-hydroxysteroid dehydrogenase 11                          | 1.56±0.14    |
| IPI00022990                 | STATH         | Statherin                                                        | 11.11        |
| IPI00739099                 | COL5A2        | Collagen alpha-2(V) chain                                        | 1.65±0.64    |
| IPI00026314                 | GSN           | Actin-depolymerizing factor                                      | 1.44±0.12    |
| IPI00847793                 | DCD           | Dermcidin isoform 2                                              | 2.12±3.46    |
| IPI00844090                 | COL5A1        | Collagen alpha-1(V) chain                                        | 1.38±0.35    |
| IPI00301579                 | NPC2          | cDNA FLJ59142, highly similar to Epididymal secretory protein E1 | 1.47±0.10    |
| IPI00176193                 | COL14A1       | Collagen alpha-1(XIV) chain                                      | 3.33±4.49    |

| <b>IPI NO.</b>                                     | <b>Symbol</b> | <b>Protein Name</b>                                              | <b>Ratio</b> |
|----------------------------------------------------|---------------|------------------------------------------------------------------|--------------|
| IPI00027462                                        | S100A9        | Calgranulin-B                                                    | 10.60        |
| IPI00945846                                        | PRSS1         | Alpha-trypsin chain 1                                            | 46.16±79.91  |
| IPI00306046                                        | EDIL3         | Developmentally-regulated endothelial cell locus 1 protein       | 1.47±0.71    |
| IPI00218803                                        | FBLN1         | Fibulin-1                                                        | 1.47         |
| IPI00645849                                        | ECM1          | Extracellular matrix protein 1                                   | 1.70±0.20    |
| IPI00395488                                        | VASN          | Protein slit-like 2                                              | 1.42±0.42    |
| IPI00027166                                        | TIMP2         | TIMP metalloproteinase inhibitor 2                               | 1.51±0.36    |
| IPI00021033                                        | COL3A1        | Collagen alpha-1(III) chain                                      | 2.14±0.50    |
| IPI00297646                                        | COL1A1        | Alpha-1 type I collagen                                          | 1.39±0.11    |
| IPI00304962                                        | COL1A2        | Alpha-2 type I collagen                                          | 1.39±0.14    |
| IPI00032293                                        | CST3          | Cystatin-3                                                       | 1.41±0.28    |
| <b>G-protein coupled receptor binding</b>          |               |                                                                  |              |
| IPI00026268                                        | GNB1          | Guanine nucleotide-binding protein G(I)/G(S)/G(T) subunit beta-1 | 1.37±0.17    |
| IPI00220578                                        | GNAI3         | G(i) alpha-3                                                     | 1.49±0.27    |
| IPI00299086                                        | SDCBP         | Melanoma differentiation-associated protein 9                    | 1.80±0.22    |
| IPI00003527                                        | SLC9A3R1      | Ezrin-radixin-moesin-binding phosphoprotein 50                   | 1.40±0.34    |
| <b>Molecular Function</b>                          |               |                                                                  |              |
| <b>Platelet-derived Growth Factor Binding</b>      |               |                                                                  |              |
| IPI00844090                                        | COL5A1        | Collagen alpha-1(V) chain                                        | 1.38±0.35    |
| IPI00021033                                        | COL3A1        | Collagen alpha-1(III) chain                                      | 2.14±0.50    |
| IPI00297646                                        | COL1A1        | Alpha-1 type I collagen                                          | 1.39±0.11    |
| IPI00304962                                        | COL1A2        | Alpha-2 type I collagen                                          | 1.39±0.14    |
| <b>Extracellular Matrix Structural Constituent</b> |               |                                                                  |              |
| IPI00218803                                        | FBLN1         | Fibulin-1                                                        | 1.47         |
| IPI00022990                                        | STATH         | Statherin                                                        | 11.11        |
| IPI00844090                                        | COL5A1        | Collagen alpha-1(V) chain                                        | 1.38±0.35    |
| IPI00739099                                        | COL5A2        | Collagen alpha-2(V) chain                                        | 1.65±0.64    |
| IPI00021033                                        | COL3A1        | Collagen alpha-1(III) chain                                      | 2.14±0.50    |
| IPI00297646                                        | COL1A1        | Alpha-1 type I collagen                                          | 1.39±0.11    |
| IPI00176193                                        | COL14A1       | Collagen alpha-1(XIV) chain                                      | 3.33±4.49    |
| IPI00304962                                        | COL1A2        | Alpha-2 type I collagen                                          | 1.39±0.14    |
| <b>Beta-amyloid Binding</b>                        |               |                                                                  |              |
| IPI00016014                                        | ITM2C         | Cerebral protein 14                                              | 2.87         |
| IPI00032293                                        | CST3          | Cystatin-3                                                       | 1.41±0.28    |
| IPI00004758                                        | LDLRAP1       | Autosomal recessive hypercholesterolemia protein                 | 1.55         |

| <b>IPI NO.</b>             | <b>Symbol</b> | <b>Protein Name</b>                                                                 | <b>Ratio</b> |
|----------------------------|---------------|-------------------------------------------------------------------------------------|--------------|
| <b>Calcium Ion Binding</b> |               |                                                                                     |              |
| IPI00027462                | S100A9        | Calgranulin-B                                                                       | 10.60        |
| IPI00006971                | CD248         | Endosialin                                                                          | 1.51         |
| IPI00329784                | RYR3          | Brain ryanodine receptor-calcium release channel                                    | 1.52         |
| IPI00219344                | HPCAL1        | Calcium-binding protein BDR-1                                                       | 1.65±0.28    |
| IPI00004312                | STAT2         | Signal transducer and activator of transcription 2                                  | 1.37±0.30    |
| IPI00307257                | TBC1D9B       | TBC1 domain family member 9B                                                        | 1.42±0.38    |
| IPI00000070                | LDLR          | Low-density lipoprotein receptor                                                    | 3.21±0.90    |
| IPI00218803                | FBLN1         | Fibulin-1                                                                           | 1.47         |
| IPI00027463                | S100A6        | Calcyclin                                                                           | 1.46         |
| IPI00909366                | MYL6B         | cDNA FLJ60058, highly similar to Myosin light chain 1, slow-twitch muscle A isoform | 2.14±1.79    |
| IPI00100980                | EHD2          | EH domain-containing protein 2                                                      | 1.48±0.19    |
| IPI00398625                | HRNR          | Hornerin                                                                            | 1.92±3.15    |
| IPI00026314                | GSN           | Actin-depolymerizing factor                                                         | 1.44±0.12    |
| IPI00642259                | DST           | 230 kDa bullous pemphigoid antigen                                                  | 1.64±0.97    |
| IPI00304227                | CDH11         | Cadherin-11                                                                         | 1.83         |
| IPI00306046                | EDIL3         | Developmentally-regulated endothelial cell locus 1 protein                          | 1.47±0.71    |
| IPI00029144                | PPP2R3A       | PP2A subunit B isoform PR72/PR130                                                   | 1.52         |
| IPI00028911                | DAG1          | Alpha-dystroglycan                                                                  | 1.38         |
| <b>Integrin Binding</b>    |               |                                                                                     |              |
| IPI00215997                | CD9           | CD9 antigen                                                                         | 1.48±0.31    |
| IPI00306046                | EDIL3         | Developmentally-regulated endothelial cell locus 1 protein                          | 1.47±0.71    |
| IPI00844090                | COL5A1        | Collagen alpha-1(V) chain                                                           | 1.38±0.35    |
| IPI00027166                | TIMP2         | TIMP metalloproteinase inhibitor 2                                                  | 1.51±0.36    |
| IPI00021033                | COL3A1        | Collagen alpha-1(III) chain                                                         | 2.14±0.50    |
| IPI00642259                | DST           | 230 kDa bullous pemphigoid antigen                                                  | 1.64±0.97    |



**Figure S1.** Cell viability test with MTT assay of GM00637 cells after 24 hrs of treatment with 0, 0.125, 0.5, 1, 2  $\mu\text{M}$  potassium dichromate.

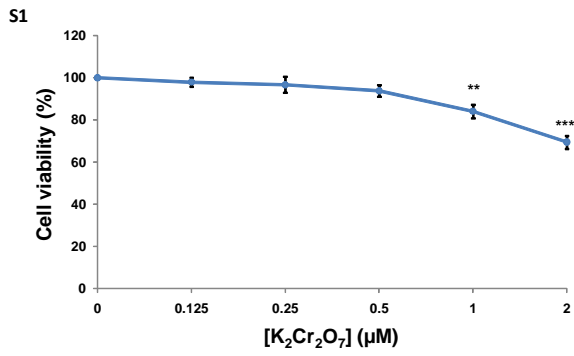

**Figure S2.** Determination of the threshold value of significantly changed proteins by Perseus.

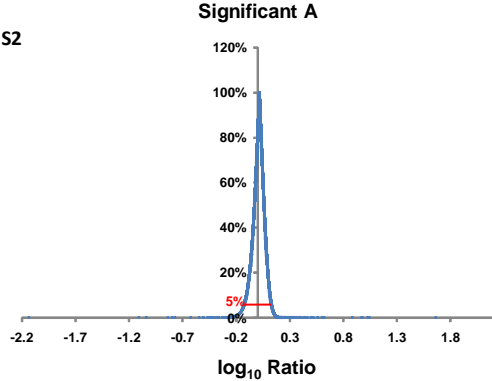

Supplement: NIHMS489061-supplement-1_si_001.pdf [file NIHMS489061-supplement-1_si_001.pdf]
